# Supplementary material for: In Vivo Screening Unveils Pervasive RNA-Binding Protein Dependencies in Leukemic Stem Cells and Identifies ELAVL1 as a Therapeutic Target
Source: PubMed Central journal article supplement — Blood Cancer Discov. 2023 Feb 9;4(3):180–207. doi: 10.1158/2643-3230.BCD-22-0086 (PMC10150294; doi:10.1158/2643-3230.bcd-22-0086), 2023-02-09
Supplement: bcd-22-0086_supplementary_figure_s3_suppst12.pdf [file bcd-22-0086_supplementary_figure_s3_suppst12.pdf]

# Supplemental Figure S3

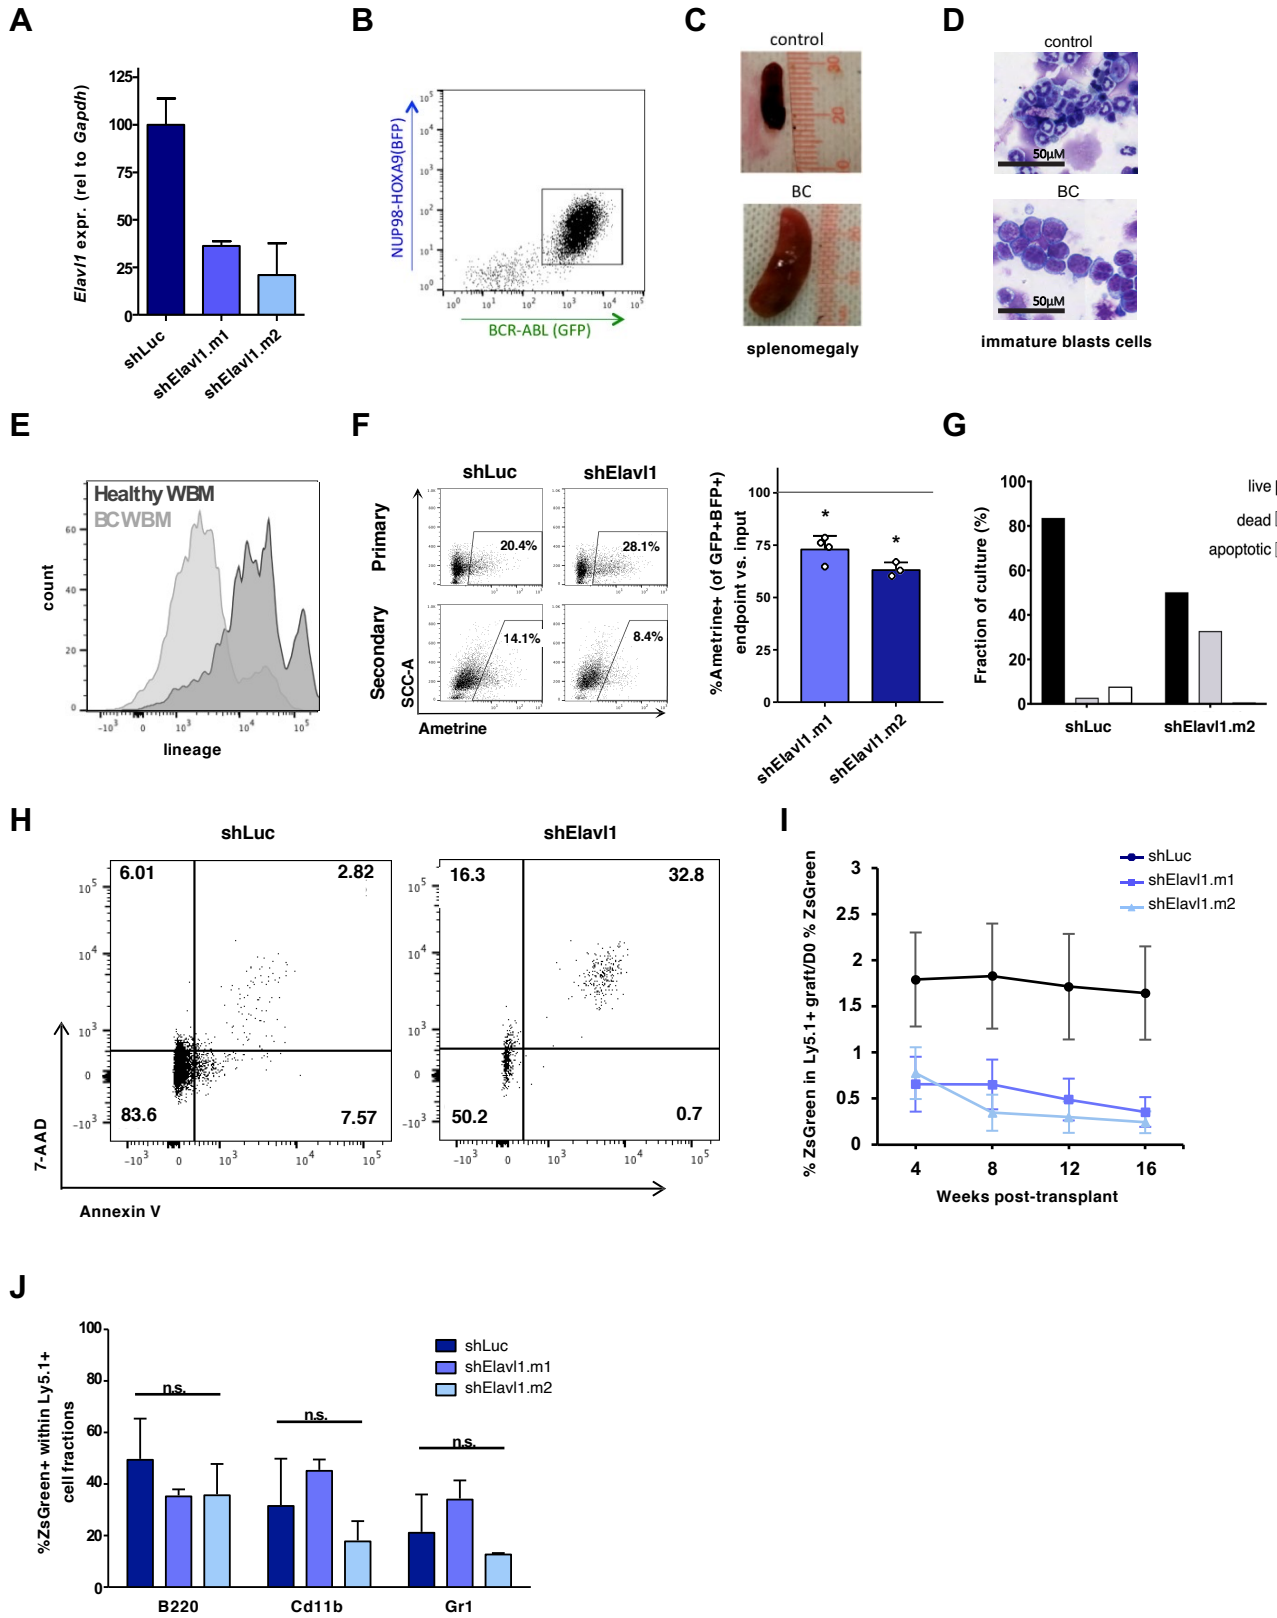

**Supplemental Figure S3. Generation of mouse myeloid leukemia models and analysis of Elavl1 knockdown in murine healthy versus malignant hematopoietic cells.** (A) qPCR knockdown validation of shElavl1.6 and shElavl1.7 Ametrine<sup>+</sup> cells in primary mouse BM. Data is normalized to *Gapdh*. (B) B6.SJL LSK cells were retrovirally infected with NUP98-HOXA9-BFP and BCR- ABL-GFP. BFP<sup>+</sup>GFP<sup>+</sup> cells isolated 48h post-infection were transplanted into C57Blk/6 recipients. Flow cytometric evaluation of endpoint blast- crisis BM grafts (10 days post- transplantation) is shown. (C, D) Splenomegaly (C) and infiltration of BM with immature blast cells (Wright-Giemsa staining of peripheral blood sampled from primary engrafted recipient mouse) (D) indicate advanced stages of disease (blast-crisis) 10 days PT. Scale bars of 50µM are shown. (E) Flow cytometric evaluation of recipient mice whole BM (WBM) at blast-crisis shows a drastic decrease in lineage positive cells as compared to WBM from healthy mice (control). \* $p < 0.05$  as determined by a two-sided Student's t test. (F) Output vs. input analysis of the Ametrine<sup>+</sup> fraction of shElavl1 transduced BC CML BM. GFP<sup>+</sup>BFP<sup>+</sup> BM was analyzed at the endpoint of secondary transplantation; data is normalized to shLuciferase (dotted line). Representative flow plots are shown at left. (G) Fraction of apoptotic cells was measured in shLuciferase- and shElavl1- transduced BC CML cultures, 3 days post-infection. Flow plots are shown in (H). (I) Percentage of ZsGreen<sup>+</sup> cells within Ly5.1<sup>+</sup> fractions in peripheral blood (PB) samples at 4-week intervals post-transplant relative to the percent of ZsGreen<sup>+</sup> cells at day 0 (D0). (J) Quantification of lineage marker expression in 18-week endpoint BM grafts initiated by shLuciferase, shElavl1.6- or shElavl1.7-transduced cells.
