# Supplementary material for: In Vivo Screening Unveils Pervasive RNA-Binding Protein Dependencies in Leukemic Stem Cells and Identifies ELAVL1 as a Therapeutic Target
Source: PubMed Central journal article supplement — Blood Cancer Discov. 2023 Feb 9;4(3):180–207. doi: 10.1158/2643-3230.BCD-22-0086 (PMC10150294; doi:10.1158/2643-3230.bcd-22-0086), 2023-02-09
Supplement: bcd-22-0086_supplementary_figure_s4_suppst13.pdf [file bcd-22-0086_supplementary_figure_s4_suppst13.pdf]

# Supplemental Figure S4

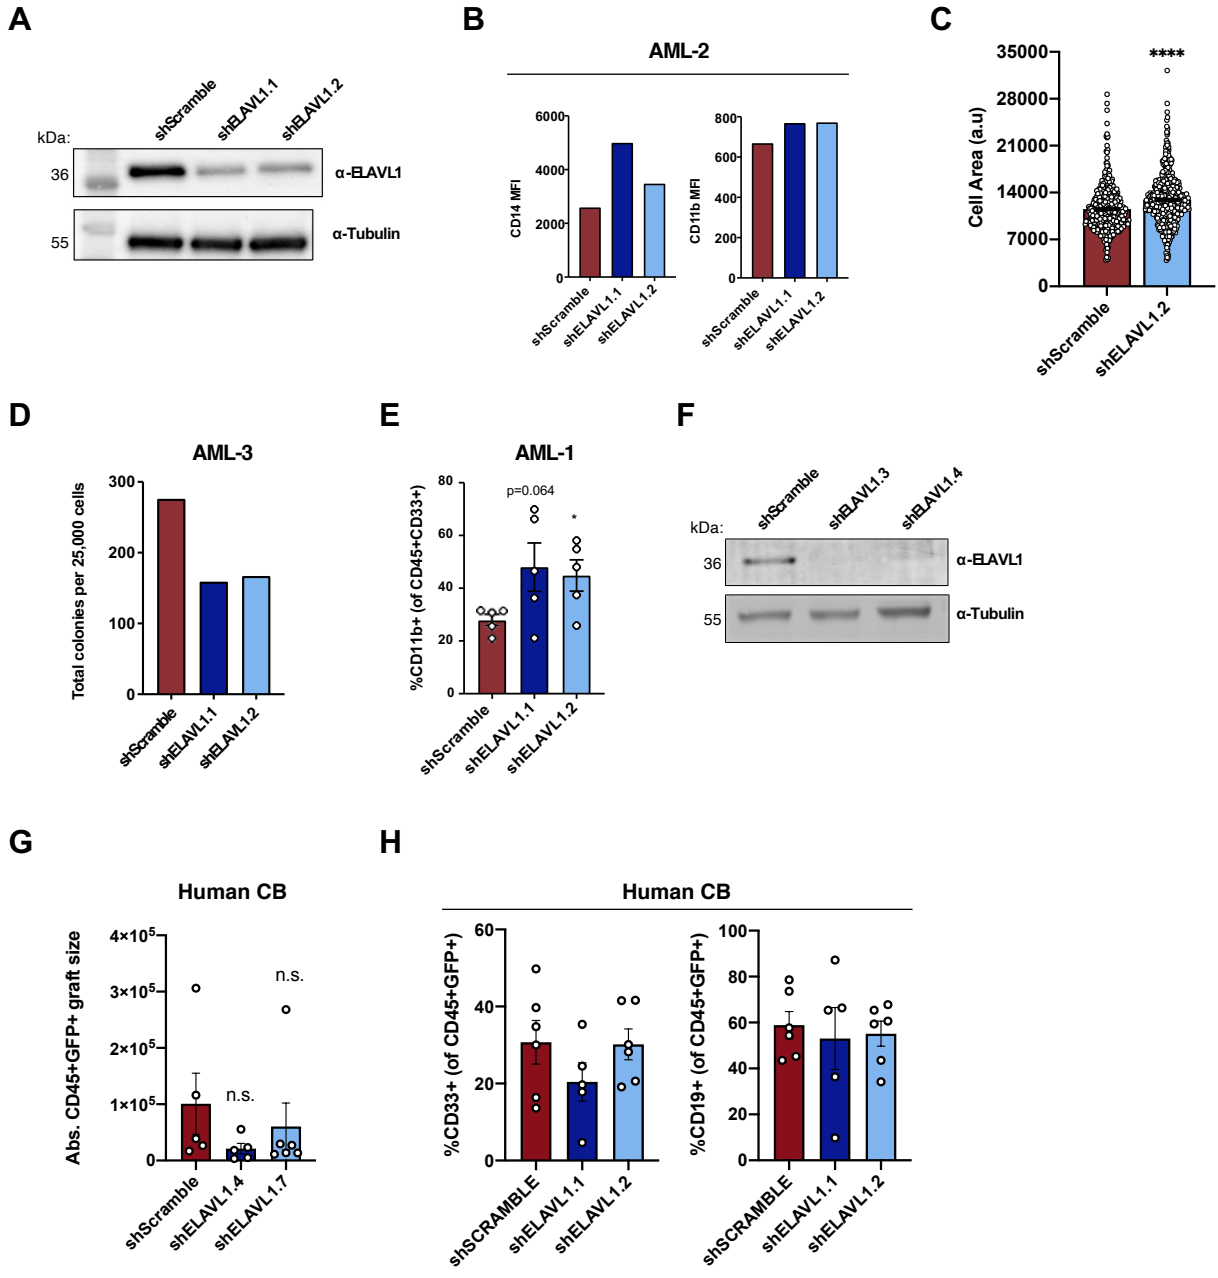

**Supplemental Figure S4. ELAVL1 knockdown promotes AML cell differentiation but maintains lineage output in healthy hematopoietic grafts.** (A) Western blot validation of ELAVL1 knockdown by shELAVL1.1 and shELAVL1.2 in HeLa cells, normalized to  $\alpha$ -tubulin. (B) Median fluorescence intensities (MFI) of CD14 and CD11b in primary AML cultures 10 days post-infection. (C) Quantification of cellular area of shScramble- and shELAVL1.2- infected primary AML cells from images of cytopsins. (D) CFU output from infected primary AML cells 16 days post- plating (n=1). (E) Flow cytometric analysis of CD11b<sup>+</sup> populations in bone marrow at endpoints from shScramble- and shELAVL1.1- infected grafts. (F) Western blot validation of ELAVL1 knockdown by shElav1.3 and shElav1.4 in HEK293 cells, normalized to  $\alpha$ -tubulin. (G) Absolute graft size (CD45<sup>+</sup>GFP<sup>+</sup>) in the bone marrow of recipient mice at endpoint. (H) Flow cytometric quantification of percentage of myeloid (CD33<sup>+</sup>) and lymphoid (CD19<sup>+</sup>) populations within bone marrow grafts of CB-transplanted mice at endpoint.
