# Supplementary material for: In Vivo Screening Unveils Pervasive RNA-Binding Protein Dependencies in Leukemic Stem Cells and Identifies ELAVL1 as a Therapeutic Target
Source: Oxford University Press journal article supplement (doi:10.1158/2643-3230.bcd-22-0086), 2023-02-09
Supplement: bcd-22-0086_supplementary_table_s3_suppst3.xlsx [file bcd-22-0086_supplementary_table_s3_suppst3.xlsx]

## Sheet: Sheet1
Supplemental Table S3. Patient AML Clinical Data
ID	Gender	Age (years)	De novo vs. Secondary	Type of Sample	FAB Subtype	Karyotype	Additional Molecular Markers
AML-1	M	64	De novo	Diagnosis	M1	46,XY[21]	FLT3-ITD
AML-2	M	78	De novo	Diagnosis	M1	46, XY[20]	na
AML-3	F	52	De novo	Diagnosis	unclassified	47, XX, +8[14]	FLT3-ITD
AML-4	M	32	De novo	Diagnosis	M1	46,XY,ider(7)(q10)del(7)(q21)[20]	nd
AML-5	F	52	De novo	Relapse	n/a	47, XX, +8[14]	FLT3-ITD
AML-6	M	64	MDS, refractory	Diagnosis	unclassified	47, XY, +8[2]/46, XY[20]	nd
AML-7	F	66	Secondary	Diagnosis	nd	46, XX[17]	nd
AML-8	M	33	De novo	Diagnosis	M4/M5-myelomonocytic with MDS-related changes	46,XY[20]	NPM1 and high FLT3-ITD
AML-9	M	84	De novo	Diagnosis	M5b	46,XY20]	nd
AML-10	F	52	De novo	Diagnosis	M5a	46,XX[12]	NPM1; FLT3-ITD; FLT3-TKD undetected
AML-11	F	55	De novo	Relapse	M4	46,XX[20]	NPM1; FLT3-ITD; FLT3-TKD
