# Supplementary material for: In Vivo Screening Unveils Pervasive RNA-Binding Protein Dependencies in Leukemic Stem Cells and Identifies ELAVL1 as a Therapeutic Target
Source: Oxford University Press journal article supplement (doi:10.1158/2643-3230.bcd-22-0086), 2023-02-09
Supplement: bcd-22-0086_supplementary_table_s4_suppst4.xlsx [file bcd-22-0086_supplementary_table_s4_suppst4.xlsx]

## Sheet: Sheet1
Supplemental Table S4: Limiting dilution analysis
Treatment	Cell dose/mouse (Input cell equivalents)	Number of mice transplanted	Number of mice engrafted	LSC frequency (0.95 confidence interval)	Number of LSC/mouse	LSC depletion
DMSO	30000 7500	12 12	11 5	Lower: 1/22508 Estimate: 1/12833 Upper: 1/7317	15.58	0.83
MS-444	30000 7500	12 12	5 0	Lower: 1/176211 Estimate: 1/73989 Upper: 1/31067	2.7
