# Supplementary material for: In Vivo Screening Unveils Pervasive RNA-Binding Protein Dependencies in Leukemic Stem Cells and Identifies ELAVL1 as a Therapeutic Target
Source: Oxford University Press journal article supplement (doi:10.1158/2643-3230.bcd-22-0086), 2023-02-09
Supplement: bcd-22-0086_supplementary_table_s5_suppst5.xlsx [file bcd-22-0086_supplementary_table_s5_suppst5.xlsx]

## Sheet: RNA-seq
Supplemental Table S5: Differentially expressed transcripts upon Elavl1 knock out in RN2c cells
index	baseMean	log2FoldChange	lfcSE	stat	pvalue	padj	gene_name
ENSMUSG00000040028.9	3025.09	-0.987012	0.0676295	-14.5944	3.05e-48	2.85e-44	Elavl1
ENSMUSG00000056054.8	5548.41	0.872846	0.0709488	12.3025	8.79e-35	4.11e-31	S100a8
ENSMUSG00000056071.6	2691.59	1.0589	0.0874633	12.1068	9.72e-34	3.03e-30	S100a9
ENSMUSG00000022026.5	2960.37	0.872993	0.0724862	12.0436	2.1e-33	4.9e-30	Olfm4
ENSMUSG00000071562.4	5734.19	0.701022	0.0658801	10.6409	1.92e-26	3.6e-23	Stfa1
ENSMUSG00000032484.6	845.241	1.1743	0.118561	9.90459	3.98e-23	6.19e-20	Ngp
ENSMUSG00000071561.2	3489.68	0.695756	0.0736051	9.45254	3.31e-21	4.42e-18	BC100530
ENSMUSG00000079597.1	1827.34	0.77644	0.0906477	8.56547	1.08e-17	1.26e-14	Gm5483
ENSMUSG00000004609.5	3796.19	0.570874	0.0668286	8.54235	1.32e-17	1.37e-14	Cd33
ENSMUSG00000032690.9	413.891	1.16282	0.142644	8.1519	3.58e-16	3.35e-13	Oas2
ENSMUSG00000040809.9	431.56	1.11877	0.148551	7.5312	5.03e-14	4.27e-11	Chi3l3
ENSMUSG00000045573.9	1551.43	0.687736	0.0914853	7.51745	5.59e-14	4.35e-11	Penk
ENSMUSG00000053477.9	10526.6	0.417518	0.0563646	7.40745	1.29e-13	9.26e-11	Tcf4
ENSMUSG00000038357.7	394.688	1.10707	0.153068	7.23257	4.74e-13	3.16e-10	Camp
ENSMUSG00000026987.9	10590.1	0.387017	0.0538066	7.19274	6.35e-13	3.96e-10	Baz2b
ENSMUSG00000089788.1	529.682	0.908952	0.12689	7.16332	7.87e-13	4.6e-10	Gm16586
ENSMUSG00000051166.8	1611.71	0.568711	0.0807093	7.04641	1.84e-12	1.01e-09	Eml5
ENSMUSG00000058624.6	4431.02	0.458234	0.0658161	6.96234	3.35e-12	1.74e-09	Gda
ENSMUSG00000026822.9	467.582	0.928904	0.134103	6.92677	4.31e-12	2.12e-09	Lcn2
ENSMUSG00000037965.8	3492.68	0.523049	0.0772932	6.76708	1.31e-11	6.14e-09	Zc3h7a
ENSMUSG00000040943.7	1547.52	0.558125	0.0841396	6.63332	3.28e-11	1.46e-08	Tet2
ENSMUSG00000092215.1	348.199	1.00721	0.152589	6.60078	4.09e-11	1.74e-08	Gm20419
ENSMUSG00000092341.1	12902.2	0.988737	0.151632	6.52065	7e-11	2.84e-08	Malat1
ENSMUSG00000029823.9	5700.43	0.396926	0.0613022	6.4749	9.49e-11	3.7e-08	Luc7l2
ENSMUSG00000054905.2	660.152	0.804456	0.124562	6.45828	1.06e-10	3.96e-08	Stfa3
ENSMUSG00000032621.6	1738.31	0.526187	0.0842739	6.24377	4.27e-10	1.54e-07	Srek1
ENSMUSG00000046434.8	1364.08	0.57309	0.0920883	6.22327	4.87e-10	1.69e-07	Hnrnpa1
ENSMUSG00000035545.7	2317.7	0.586978	0.0950873	6.17305	6.7e-10	2.24e-07	Leng8
ENSMUSG00000035021.7	8865.52	0.353472	0.057388	6.15934	7.31e-10	2.35e-07	Baz1a
ENSMUSG00000032525.6	3736.95	0.392444	0.0638128	6.14992	7.75e-10	2.42e-07	Nktr
ENSMUSG00000059657.4	220.792	1.19122	0.194773	6.11596	9.6e-10	2.89e-07	Stfa2l1
ENSMUSG00000034160.7	4136.96	0.422293	0.0695852	6.06872	1.29e-09	3.77e-07	Ogt
ENSMUSG00000040865.8	3959.63	0.410258	0.0686955	5.97212	2.34e-09	6.63e-07	Ino80d
ENSMUSG00000090086.1	485.862	0.860499	0.145527	5.91298	3.36e-09	9.24e-07	AI480526
ENSMUSG00000025498.7	263.066	1.02782	0.174017	5.90643	3.5e-09	9.34e-07	Irf7
ENSMUSG00000021282.9	11580.9	0.313919	0.0539982	5.81351	6.12e-09	1.59e-06	Eif5
ENSMUSG00000026034.10	2870.36	0.407447	0.0703039	5.79551	6.81e-09	1.72e-06	Clk1
ENSMUSG00000085334.1	452.464	0.778568	0.136162	5.71794	1.08e-08	2.65e-06	Gm12940
ENSMUSG00000033487.8	3099.1	0.382393	0.0678411	5.63659	1.73e-08	4.16e-06	Fndc3a
ENSMUSG00000034163.9	1461.44	0.484282	0.0860001	5.63117	1.79e-08	4.18e-06	Zfc3h1
ENSMUSG00000035597.11	1210.32	0.540682	0.0965368	5.60079	2.13e-08	4.86e-06	Prpf39
ENSMUSG00000056763.9	798.065	0.582274	0.104663	5.56333	2.65e-08	5.89e-06	Cspp1
ENSMUSG00000004668.7	1989.99	0.446151	0.0804854	5.54325	2.97e-08	6.45e-06	Abca13
ENSMUSG00000035992.9	1643.31	0.503659	0.0918071	5.48605	4.11e-08	8.54e-06	Fnip1
ENSMUSG00000007850.10	13332.9	0.293706	0.0535011	5.48973	4.03e-08	8.54e-06	Hnrnph1
ENSMUSG00000040152.8	5627	0.361914	0.0672122	5.38465	7.26e-08	1.47e-05	Thbs1
ENSMUSG00000037876.9	4529.5	0.415933	0.0781823	5.32004	1.04e-07	2.06e-05	Jmjd1c
ENSMUSG00000028053.7	1510.26	0.438049	0.0826039	5.303	1.14e-07	2.17e-05	Ash1l
ENSMUSG00000033943.9	1974.07	0.420889	0.0793625	5.30338	1.14e-07	2.17e-05	Mga
ENSMUSG00000008200.7	3606.66	0.358956	0.0681757	5.26516	1.4e-07	2.62e-05	Fnbp4
ENSMUSG00000028248.6	2346.12	0.396691	0.0764063	5.19186	2.08e-07	3.82e-05	Sfrs18
ENSMUSG00000089726.1	490.401	0.662758	0.12827	5.16689	2.38e-07	4.28e-05	Mir17hg
ENSMUSG00000014496.7	6011.07	0.305768	0.0595813	5.13195	2.87e-07	5.06e-05	Ankrd28
ENSMUSG00000022961.10	19956.8	0.288956	0.0571268	5.05816	4.23e-07	7.33e-05	Son
ENSMUSG00000026082.6	2245.49	0.372129	0.0738877	5.03642	4.74e-07	8.06e-05	Rev1
ENSMUSG00000027620.9	7613.74	0.302477	0.0603027	5.01598	5.28e-07	8.81e-05	Rbm39
ENSMUSG00000017737.2	328.159	0.796786	0.161788	4.92488	8.44e-07	0.000138422	Mmp9
ENSMUSG00000057110.8	4184.64	0.33858	0.0695556	4.86776	1.13e-06	0.000175831	Cep110
ENSMUSG00000037266.11	7247.23	0.293744	0.0602889	4.87226	1.1e-06	0.000175831	D4Wsu53e
ENSMUSG00000028134.7	709.638	0.563354	0.115715	4.86848	1.12e-06	0.000175831	Ptbp2
ENSMUSG00000038538.10	2055.44	0.37391	0.0771884	4.84412	1.27e-06	0.000194873	Ubn2
ENSMUSG00000024164.8	4959.14	0.308412	0.0639119	4.82557	1.4e-06	0.000207123	C3
ENSMUSG00000035967.8	1214.35	0.428847	0.088869	4.8256	1.4e-06	0.000207123	Ddx26b
ENSMUSG00000041328.9	1404.51	0.431655	0.0896512	4.81483	1.47e-06	0.000215169	Pcf11
ENSMUSG00000079036.3	1191.51	0.435005	0.091059	4.77717	1.78e-06	0.000252512	Alkbh1
ENSMUSG00000032661.8	573.291	0.662106	0.138615	4.77658	1.78e-06	0.000252512	Oas3
ENSMUSG00000072214.5	584.927	0.56745	0.11921	4.76007	1.94e-06	0.000269982	Sept5
ENSMUSG00000030137.7	4512.99	-0.293305	0.0621516	-4.71918	2.37e-06	0.000325491	Tuba8
ENSMUSG00000042410.7	5357.24	0.323493	0.0686678	4.71098	2.47e-06	0.000333958	Agps
ENSMUSG00000020994.4	3432.68	0.314924	0.0676182	4.65738	3.2e-06	0.000427639	Pnn
ENSMUSG00000060131.5	9662.63	0.270082	0.0580926	4.64916	3.33e-06	0.000438774	Atp8b4
ENSMUSG00000084796.1	357.711	0.729382	0.158224	4.60979	4.03e-06	0.000523259	A430104N18Rik
ENSMUSG00000029068.9	3395.51	0.385143	0.0837259	4.60005	4.22e-06	0.000540833	Ccnl2
ENSMUSG00000028207.11	2340.28	0.330865	0.0721407	4.58639	4.51e-06	0.000569638	Asph
ENSMUSG00000090957.1	254.388	-0.782119	0.17173	-4.55436	5.25e-06	0.000654843	Gm7535
ENSMUSG00000026305.8	9071.43	0.266411	0.0587095	4.53779	5.68e-06	0.000699144	Lrrfip1
ENSMUSG00000030655.7	5230.65	0.27445	0.0605979	4.52903	5.93e-06	0.000719295	Smg1
ENSMUSG00000070327.6	5500.71	0.266521	0.0590045	4.51696	6.27e-06	0.000751772	Rnf213
ENSMUSG00000022974.6	1882.27	0.35654	0.0791089	4.50696	6.58e-06	0.000768372	Gcfc1
ENSMUSG00000020863.9	2691.45	0.38337	0.0850375	4.50825	6.54e-06	0.000768372	Luc7l3
ENSMUSG00000010608.8	4426.82	0.340883	0.0757722	4.49878	6.83e-06	0.000788659	Rbm25
ENSMUSG00000037857.8	1718.7	0.354569	0.0790044	4.48796	7.19e-06	0.000819667	Nufip2
ENSMUSG00000047909.5	772.604	0.54886	0.122496	4.48064	7.44e-06	0.000838066	Ankrd16
ENSMUSG00000069565.6	4271.74	-0.277216	0.061942	-4.47541	7.63e-06	0.000848618	Dazap1
ENSMUSG00000044934.6	970.635	0.441861	0.0989025	4.46764	7.91e-06	0.000869691	Zfp367
ENSMUSG00000028842.8	572.773	0.531905	0.119336	4.4572	8.3e-06	0.000881987	Eif2c3
ENSMUSG00000032405.8	5730.2	0.278367	0.0624344	4.45855	8.25e-06	0.000881987	Pias1
ENSMUSG00000059895.6	4860.1	-0.285993	0.0640966	-4.46191	8.12e-06	0.000881987	Ptp4a3
ENSMUSG00000026977.11	3500.82	0.345402	0.077706	4.44498	8.79e-06	0.000923152	March7
ENSMUSG00000019769.9	1614.16	0.371588	0.0838506	4.43155	9.36e-06	0.000971674	Syne1
ENSMUSG00000036197.8	2157.4	0.334004	0.0756345	4.41603	1.01e-05	0.00102138	Gxylt1
ENSMUSG00000029304.8	3841.51	0.327297	0.0740929	4.41738	9.99e-06	0.00102138	Spp1
ENSMUSG00000029915.7	603.9	0.523906	0.118943	4.40467	1.06e-05	0.00106481	Clec5a
ENSMUSG00000062593.8	1151.93	0.425779	0.0969352	4.39241	1.12e-05	0.00111467	Lilrb4
ENSMUSG00000002413.8	1300.25	0.387453	0.0887829	4.36405	1.28e-05	0.00122877	Braf
ENSMUSG00000027829.8	3268.12	0.293996	0.0673894	4.36264	1.28e-05	0.00122877	Ccnl1
ENSMUSG00000041685.8	1171.26	0.412068	0.0943554	4.3672	1.26e-05	0.00122877	Fcho2
ENSMUSG00000024006.10	2177.21	0.368697	0.0845232	4.36208	1.29e-05	0.00122877	Stk38
ENSMUSG00000017291.7	1993.2	0.386978	0.0889265	4.35166	1.35e-05	0.00127562	Taok1
ENSMUSG00000068240.3	5664.07	-0.273679	0.0632408	-4.32757	1.51e-05	0.00139523	Gm11808
ENSMUSG00000072501.3	1457.32	0.388586	0.0897874	4.32785	1.51e-05	0.00139523	Phf20l1
ENSMUSG00000054737.5	216.598	0.831602	0.193151	4.30545	1.67e-05	0.00152709	Zfp182
ENSMUSG00000038095.8	3907.61	0.273287	0.063699	4.29029	1.78e-05	0.00160374	Sbno1
ENSMUSG00000047036.7	1043.77	0.407328	0.0949308	4.29078	1.78e-05	0.00160374	Zfp445
ENSMUSG00000029328.8	5865.39	0.266364	0.0622961	4.27577	1.9e-05	0.00169562	Hnrpdl
ENSMUSG00000092274.1	1044.03	1.08179	0.253282	4.27109	1.95e-05	0.00171526	Neat1
ENSMUSG00000055436.11	5654.53	0.260278	0.0610103	4.26614	1.99e-05	0.00173737	Srsf11
ENSMUSG00000040296.8	646.745	0.506314	0.119357	4.24203	2.22e-05	0.0018486	Ddx58
ENSMUSG00000066551.6	3530.45	0.27848	0.0656069	4.24467	2.19e-05	0.0018486	Hmgb1
ENSMUSG00000024423.5	858.673	0.438196	0.103264	4.24347	2.2e-05	0.0018486	Impact
ENSMUSG00000037652.8	1453.47	0.368988	0.0868306	4.24951	2.14e-05	0.0018486	Phc3
ENSMUSG00000050310.7	1041.23	0.399173	0.0940764	4.24308	2.2e-05	0.0018486	Rictor
ENSMUSG00000022360.6	4220.74	0.341956	0.0806597	4.23949	2.24e-05	0.00185306	Atad2
ENSMUSG00000039968.5	2437.34	0.367725	0.0867791	4.23748	2.26e-05	0.00185332	Rsbn1l
ENSMUSG00000059005.6	1685.7	0.339565	0.0801763	4.23522	2.28e-05	0.00185581	Hnrnpa3
ENSMUSG00000000838.10	2446.88	0.366666	0.0867083	4.22873	2.35e-05	0.0018937	Fmr1
ENSMUSG00000032265.8	1043.94	0.401539	0.095048	4.22459	2.39e-05	0.00191234	Fam46a
ENSMUSG00000025236.9	1742.76	0.383611	0.0910177	4.21468	2.5e-05	0.00198133	Adpgk
ENSMUSG00000039782.7	1171.87	0.381205	0.0905057	4.21194	2.53e-05	0.00198867	Cpeb2
ENSMUSG00000054387.6	2941.31	0.288425	0.0685088	4.21004	2.55e-05	0.00198877	Mdm4
ENSMUSG00000025060.8	5956.84	0.284459	0.0676102	4.20734	2.58e-05	0.001996	Slk
ENSMUSG00000025492.6	216.422	0.833778	0.198425	4.20198	2.65e-05	0.00202717	Ifitm3
ENSMUSG00000047213.7	2158.82	0.320731	0.0764341	4.19618	2.71e-05	0.00206287	Ythdf3
ENSMUSG00000036768.5	2028.65	0.354245	0.0853252	4.15171	3.3e-05	0.00244806	Kif15
ENSMUSG00000006262.9	887.523	0.42701	0.102841	4.15214	3.29e-05	0.00244806	Mob1b
ENSMUSG00000039153.9	4808.82	0.291433	0.0701466	4.15463	3.26e-05	0.00244806	Runx2
ENSMUSG00000074788.3	688.816	0.555373	0.134162	4.13957	3.48e-05	0.00256093	5830416P10Rik
ENSMUSG00000027365.8	2359.28	0.348372	0.0844947	4.123	3.74e-05	0.0027308	Trpm7
ENSMUSG00000021068.9	12977.3	0.239067	0.0583868	4.09454	4.23e-05	0.00306495	Nin
ENSMUSG00000034994.9	101611	-0.196691	0.0480847	-4.09051	4.3e-05	0.0030947	Eef2
ENSMUSG00000029714.7	1287.32	0.436125	0.107626	4.05223	5.07e-05	0.00361978	Gigyf1
ENSMUSG00000020017.8	439.153	0.578679	0.143056	4.04513	5.23e-05	0.00370296	Hal
ENSMUSG00000027881.8	3471	0.275605	0.0684154	4.0284	5.62e-05	0.00394663	Prpf38b
ENSMUSG00000024079.4	976.083	0.438454	0.109047	4.02079	5.8e-05	0.00404602	Eif2ak2
ENSMUSG00000055897.7	458.047	0.58502	0.145741	4.0141	5.97e-05	0.00413156	Ppp4r1l-ps
ENSMUSG00000040565.6	2619.82	0.293221	0.0732963	4.00049	6.32e-05	0.00431273	Btaf1
ENSMUSG00000034957.9	3964.74	-0.27892	0.0697065	-4.00135	6.3e-05	0.00431273	Cebpa
ENSMUSG00000021185.9	2200.14	-0.298686	0.0748057	-3.99282	6.53e-05	0.00442232	9030617O03Rik
ENSMUSG00000062627.3	795.208	0.44623	0.112154	3.97875	6.93e-05	0.00465869	Mysm1
ENSMUSG00000034243.9	2211.39	0.312455	0.0786792	3.97125	7.15e-05	0.00476193	Golgb1
ENSMUSG00000028403.9	2159.08	0.310267	0.0781503	3.97013	7.18e-05	0.00476193	Zdhhc21
ENSMUSG00000068220.5	21618.7	-0.2019	0.0509782	-3.96052	7.48e-05	0.00488832	Lgals1
ENSMUSG00000046157.7	5728.42	-0.233954	0.0590519	-3.96184	7.44e-05	0.00488832	Tmem229b
ENSMUSG00000071337.4	2470.29	0.293786	0.0742181	3.95842	7.54e-05	0.00489722	Tia1
ENSMUSG00000041268.10	1252.47	0.346102	0.0877334	3.94493	7.98e-05	0.00514551	Dmxl2
ENSMUSG00000072847.3	561.321	0.476537	0.120857	3.94298	8.05e-05	0.00515202	A530017D24Rik
ENSMUSG00000071796.6	329.899	0.617855	0.157292	3.92808	8.56e-05	0.00544447	6820431F20Rik
ENSMUSG00000057036.5	9880.1	-0.229812	0.0586483	-3.91847	8.91e-05	0.00562789	Gm7536
ENSMUSG00000036606.9	661.799	-0.451126	0.115411	-3.90886	9.27e-05	0.00581736	Plxnb2
ENSMUSG00000087412.3	5822.94	-0.266531	0.068256	-3.90488	9.43e-05	0.00587452	Gm15501
ENSMUSG00000023150.8	10316.2	0.209576	0.0538923	3.8888	0.000100742	0.006236	Ivns1abp
ENSMUSG00000019943.8	1165.23	0.376116	0.0968827	3.88218	0.000103526	0.00636614	Atp2b1
ENSMUSG00000025494.7	644.547	0.452391	0.117027	3.86571	0.000110766	0.00676688	Sigirr
ENSMUSG00000052760.8	2066.12	0.344055	0.089113	3.86089	0.000112975	0.00685701	A630001G21Rik
ENSMUSG00000022119.8	1712.63	0.342764	0.0888485	3.85784	0.000114392	0.00689819	Rbm26
ENSMUSG00000029647.7	4187.76	0.246752	0.0641071	3.84906	0.000118572	0.00710443	Pan3
ENSMUSG00000004789.8	4925.79	-0.247097	0.064224	-3.84742	0.00011937	0.00710667	Dlst
ENSMUSG00000075376.4	1007.88	0.378171	0.0984079	3.8429	0.00012159	0.00719305	Rc3h2
ENSMUSG00000024975.6	2068.36	0.298571	0.077877	3.83388	0.000126137	0.0074151	Pdcd4
ENSMUSG00000046111.9	1455.41	0.341461	0.0891354	3.83081	0.000127721	0.0074612	5830418K08Rik
ENSMUSG00000042354.6	2281.54	0.295969	0.0772911	3.82928	0.000128517	0.0074612	Gnl3
ENSMUSG00000031613.8	5786.01	0.272256	0.0711845	3.82465	0.000130956	0.00755585	Hpgd
ENSMUSG00000054452.8	7920.38	-0.215538	0.0564135	-3.82069	0.000133078	0.00763115	Aes
ENSMUSG00000048107.8	1253.71	0.334384	0.087735	3.8113	0.00013824	0.00783887	Kctd12
ENSMUSG00000041459.8	8008.16	0.214769	0.0563543	3.81105	0.000138377	0.00783887	Tardbp
ENSMUSG00000024085.7	3300.21	0.264818	0.0695342	3.80845	0.000139839	0.00787397	Man2a1
ENSMUSG00000050621.4	5699.43	-0.236842	0.0623593	-3.79802	0.000145854	0.00816347	Gm9846
ENSMUSG00000003847.9	1382.09	0.328048	0.0864153	3.79618	0.000146946	0.0081756	Nfat5
ENSMUSG00000032449.7	1391.11	0.371149	0.0979975	3.78733	0.000152275	0.00837562	Slc25a36
ENSMUSG00000036916.7	601.451	0.449438	0.118672	3.78724	0.000152333	0.00837562	Zfp280c
ENSMUSG00000052456.8	1526.68	-0.313555	0.0828391	-3.78511	0.00015364	0.00839808	Asna1
ENSMUSG00000027035.2	1240.81	0.342548	0.0906822	3.77746	0.000158438	0.00861003	Lass6
ENSMUSG00000039270.3	913.479	0.378249	0.100628	3.75888	0.000170673	0.00922125	Megf9
ENSMUSG00000043535.7	3287.07	0.285613	0.0761014	3.75306	0.000174686	0.00938384	Setx
ENSMUSG00000017550.7	1396.82	0.361715	0.0969657	3.73034	0.000191222	0.0102134	Atad5
ENSMUSG00000020362.7	4273.25	0.235099	0.0632139	3.7191	0.000199935	0.0106181	Cnot6
ENSMUSG00000024943.7	895.248	0.409941	0.110276	3.71742	0.000201264	0.0106283	Smc5
ENSMUSG00000040907.9	14714.6	-0.206239	0.055555	-3.71235	0.000205347	0.010783	Atp1a3
ENSMUSG00000037808.6	1511.57	0.313366	0.0844701	3.70979	0.000207431	0.0107926	Fam76b
ENSMUSG00000057596.7	288.738	0.649979	0.17523	3.70929	0.000207839	0.0107926	Trim30d
ENSMUSG00000036990.6	5485.62	0.221417	0.0597849	3.70356	0.000212596	0.0109786	Otud4
ENSMUSG00000087679.2	1290.07	-0.323907	0.0875903	-3.69798	0.000217319	0.0111609	C330006A16Rik
ENSMUSG00000076617.2	6412.19	-0.213243	0.0576899	-3.69638	0.000218699	0.0111704	Ighm
ENSMUSG00000025609.9	1644.31	0.314317	0.0851333	3.69205	0.000222451	0.0113003	Mkln1
ENSMUSG00000051949.5	367.801	0.537536	0.14584	3.6858	0.000227988	0.0115189	2010005H15Rik
ENSMUSG00000048154.7	7496.32	0.268388	0.0729539	3.67887	0.00023427	0.0117097	Mll2
ENSMUSG00000030921.9	953.88	0.37354	0.101514	3.6797	0.000233507	0.0117097	Trim30a
ENSMUSG00000023025.8	2163.78	0.322797	0.0879582	3.6699	0.000242648	0.012064	Larp4
ENSMUSG00000071793.5	472.717	0.477166	0.130558	3.65482	0.000257363	0.0126609	2610005L07Rik
ENSMUSG00000078671.3	2616.07	0.280571	0.076744	3.65594	0.000256245	0.0126609	Chd2
ENSMUSG00000026893.4	527.002	0.452759	0.124104	3.64822	0.000264068	0.0129227	Gca
ENSMUSG00000031584.9	19871.7	0.197971	0.0543252	3.64418	0.000268242	0.0130473	Gsr
ENSMUSG00000032518.5	18501.5	-0.189105	0.0519081	-3.64307	0.000269405	0.0130473	Rpsa
ENSMUSG00000019726.9	1079.53	0.337491	0.0928512	3.63475	0.000278247	0.013406	Lyst
ENSMUSG00000024383.8	1075.79	0.349798	0.0962911	3.63272	0.000280452	0.013443	Map3k2
ENSMUSG00000029422.7	1913.54	0.28705	0.0792027	3.62425	0.000289805	0.0138204	Rsrc2
ENSMUSG00000020590.8	986.064	0.368133	0.101769	3.61734	0.000297642	0.0141221	Snx13
ENSMUSG00000030276.12	409.488	0.584382	0.161958	3.60824	0.000308283	0.0145531	Ttll3
ENSMUSG00000072620.3	556.367	0.438201	0.121594	3.60381	0.000313586	0.0147291	Slfn2
ENSMUSG00000051278.8	612.945	0.423179	0.117482	3.60207	0.000315697	0.0147541	4930422G04Rik
ENSMUSG00000022789.7	2018.89	0.296804	0.0824526	3.59969	0.000318591	0.0147886	Dnm1l
ENSMUSG00000022124.8	1037.01	0.343343	0.095403	3.59887	0.0003196	0.0147886	Fbxl3
ENSMUSG00000041219.7	4639.22	0.224308	0.0623529	3.59739	0.000321427	0.0147999	Arhgap11a
ENSMUSG00000047888.8	2493.07	0.264155	0.0736961	3.58439	0.000337873	0.0154809	Tnrc6b
ENSMUSG00000062198.4	323.99	0.560873	0.156588	3.58184	0.000341186	0.0155564	2700097O09Rik
ENSMUSG00000028060.9	1754.82	0.291596	0.081531	3.57651	0.000348213	0.0157997	2810403A07Rik
ENSMUSG00000034761.9	542.081	0.440165	0.123241	3.57158	0.000354839	0.0160226	Map4k5
ENSMUSG00000029817.8	3601.35	0.249582	0.07008	3.56138	0.000368906	0.0165777	Tra2a
ENSMUSG00000027312.8	2847.03	0.247042	0.0694192	3.5587	0.00037269	0.0165883	Atrn
ENSMUSG00000030091.9	14250.4	-0.193556	0.054372	-3.55984	0.000371081	0.0165883	Nup210
ENSMUSG00000028937.8	2629.09	-0.248091	0.069993	-3.54451	0.000393345	0.0174246	Acot7
ENSMUSG00000036622.8	7980.41	-0.243279	0.0688383	-3.53406	0.000409223	0.0180425	Atp13a2
ENSMUSG00000000204.8	5661.1	0.491244	0.139177	3.52964	0.00041613	0.0182609	Slfn4
ENSMUSG00000026349.8	1672.31	0.281773	0.0799894	3.52263	0.000427292	0.0186631	Ccnt2
ENSMUSG00000026648.11	525.505	0.445757	0.126791	3.51569	0.000438608	0.0190682	Dclre1c
ENSMUSG00000038047.11	1285.4	0.313464	0.0895163	3.50176	0.000462204	0.020001	Haus6
ENSMUSG00000021669.7	2503.53	0.259985	0.0744716	3.49106	0.000481107	0.0202563	Col4a3bp
ENSMUSG00000091747.2	26335	-0.21185	0.0606629	-3.49225	0.000478967	0.0202563	D17H6S56E-5
ENSMUSG00000020069.9	979.581	0.355728	0.1018	3.49437	0.000475183	0.0202563	Hnrnph3
ENSMUSG00000052837.4	3890.73	-0.251235	0.0718691	-3.49574	0.000472752	0.0202563	Junb
ENSMUSG00000033880.5	1271.89	0.306593	0.087722	3.49506	0.00047396	0.0202563	Lgals3bp
ENSMUSG00000047676.5	11658.6	-0.191174	0.0547517	-3.49165	0.000480043	0.0202563	Rpsa-ps10
ENSMUSG00000043801.6	6463.19	-0.205434	0.0588926	-3.48828	0.000486142	0.0203299	Gm9786
ENSMUSG00000032688.6	1291.54	0.30604	0.0877484	3.48769	0.000487204	0.0203299	Malt1
ENSMUSG00000043279.8	3428.36	0.228076	0.0656283	3.47527	0.000510335	0.0212004	Trim56
ENSMUSG00000033799.8	857.295	0.365012	0.105145	3.47153	0.000517505	0.0214032	BC016423
ENSMUSG00000030275.4	3664.29	0.222012	0.0640163	3.46805	0.000524251	0.0215867	Etnk1
ENSMUSG00000078122.3	947.514	-0.357909	0.103597	-3.45484	0.00055063	0.0224748	F630028O10Rik
ENSMUSG00000024012.10	2686.38	-0.242889	0.0703005	-3.45501	0.000550272	0.0224748	Mtch1
ENSMUSG00000002325.8	1105.8	0.325702	0.0945064	3.44635	0.000568217	0.0230918	Irf9
ENSMUSG00000022587.7	31379.5	-0.199178	0.0578808	-3.44117	0.000579214	0.0232357	Ly6e
ENSMUSG00000037533.10	2538.22	0.264475	0.0768294	3.44236	0.000576655	0.0232357	Rapgef6
ENSMUSG00000024298.8	916.317	0.358247	0.104091	3.44167	0.00057814	0.0232357	Zfp871
ENSMUSG00000046295.7	453.086	0.49514	0.144063	3.43697	0.000588262	0.0234978	Ankle1
ENSMUSG00000027580.10	2240.27	0.256762	0.0748825	3.42887	0.000606107	0.0240054	BC006779
ENSMUSG00000056749.7	1182.64	-0.3307	0.0964458	-3.42887	0.000606106	0.0240054	Nfil3
ENSMUSG00000020372.9	36752.8	-0.168342	0.0491302	-3.42645	0.000611526	0.0241093	Gnb2l1
ENSMUSG00000028161.9	2884.96	0.264153	0.0771158	3.4254	0.000613887	0.0241093	Ppp3ca
ENSMUSG00000000171.4	3067.26	-0.238483	0.0696859	-3.42225	0.000621045	0.0242883	Sdhd
ENSMUSG00000037486.10	2006.96	0.263947	0.0771558	3.42096	0.000624013	0.0243027	Asxl2
ENSMUSG00000027199.8	2467.31	0.258179	0.0756624	3.41225	0.000644302	0.0249691	Gatm
ENSMUSG00000031785.8	6014.47	-0.223397	0.0655056	-3.41035	0.000648801	0.0249691	Gpr56
ENSMUSG00000020894.10	1057.09	0.374836	0.109916	3.41021	0.000649138	0.0249691	Vamp2
ENSMUSG00000019802.6	2644.81	0.252275	0.0742481	3.39773	0.000679474	0.0259226	Sec63
ENSMUSG00000041846.8	3482.61	0.26244	0.0772314	3.3981	0.000678557	0.0259226	Smek1
ENSMUSG00000019790.9	3230.5	0.225224	0.0664366	3.39006	0.000698775	0.0265506	Stxbp5
ENSMUSG00000090663.1	1717.85	0.30832	0.0911244	3.38351	0.000715662	0.0269729	Srcap
ENSMUSG00000087370.2	1178.23	0.316652	0.0935567	3.3846	0.00071283	0.0269729	Tmem170b
ENSMUSG00000028064.8	1425.42	0.303533	0.0897927	3.38038	0.000723867	0.0271726	Sema4a
ENSMUSG00000078193.1	4884.14	-0.246308	0.072999	-3.37413	0.000740499	0.0276858	Gm2000
ENSMUSG00000038623.3	4541.72	0.206198	0.061205	3.36897	0.000754502	0.0279928	Tm6sf1
ENSMUSG00000024034.6	301.645	0.57355	0.170249	3.3689	0.0007547	0.0279928	Tmprss3
ENSMUSG00000039218.9	20986.1	0.198943	0.0591231	3.36489	0.000765746	0.0282902	Srrm2
ENSMUSG00000056608.6	3406.59	0.256739	0.076416	3.35976	0.000780105	0.0287072	Chd9
ENSMUSG00000048279.10	496.326	0.442321	0.131788	3.35631	0.000789899	0.0289537	Sacs
ENSMUSG00000062822.7	1217.6	0.321915	0.0960404	3.35187	0.000802677	0.0290799	4833420G17Rik
ENSMUSG00000026970.9	1691.34	0.314295	0.0937363	3.35298	0.000799475	0.0290799	Rbms1
ENSMUSG00000029179.8	1215.01	0.308054	0.0918928	3.35232	0.000801376	0.0290799	Zcchc4
ENSMUSG00000085362.1	271.517	0.597766	0.178453	3.3497	0.00080898	0.0291951	C030034L19Rik
ENSMUSG00000033066.9	1187.22	0.304011	0.0908754	3.34536	0.000821751	0.0294288	Gas7
ENSMUSG00000019982.7	17330.2	0.172253	0.0514832	3.34582	0.000820404	0.0294288	Myb
ENSMUSG00000038056.8	2609.52	0.23557	0.070628	3.33536	0.000851881	0.0303914	Mll3
ENSMUSG00000022255.9	11842.7	0.197662	0.0593871	3.32837	0.000873573	0.0309291	Mtdh
ENSMUSG00000012640.9	564.003	0.4231	0.127115	3.32847	0.000873239	0.0309291	Zfp715
ENSMUSG00000049658.7	1392.22	0.325114	0.0977608	3.3256	0.000882271	0.0311192	Bdp1
ENSMUSG00000028676.10	3434.19	0.264289	0.0795541	3.32213	0.000893321	0.0313905	Srsf10
ENSMUSG00000050931.6	7153.17	0.190704	0.057445	3.31977	0.000900908	0.0315385	Sgms2
ENSMUSG00000029290.5	603.114	0.394923	0.11902	3.31812	0.000906249	0.0316071	Zfp326
ENSMUSG00000068394.4	786.785	0.348375	0.105069	3.31568	0.000914205	0.0317661	Cep152
ENSMUSG00000030474.8	484.973	0.452268	0.136491	3.31355	0.000921204	0.0318907	Siglece
ENSMUSG00000038766.9	4137.03	0.211458	0.0638915	3.30965	0.000934128	0.0322188	Gabpb2
ENSMUSG00000030779.8	3101.31	0.238091	0.0720381	3.30507	0.000949541	0.03263	Rbbp6
ENSMUSG00000057181.8	463.915	0.433387	0.131207	3.30308	0.000956281	0.0327412	5730455P16Rik
ENSMUSG00000055296.7	1546.4	0.285801	0.0865999	3.30025	0.000966003	0.0327746	D730040F13Rik
ENSMUSG00000002028.6	40125.7	0.16513	0.0500435	3.29973	0.000967775	0.0327746	Mll1
ENSMUSG00000041920.8	4486.77	0.208931	0.0632787	3.30176	0.00096079	0.0327746	Slc16a6
ENSMUSG00000078859.3	270.44	0.578836	0.175539	3.29747	0.000975591	0.03292	Gm17491
ENSMUSG00000055204.7	5494.29	0.197584	0.0601056	3.28728	0.00101161	0.0332975	Ankrd17
ENSMUSG00000019122.7	14768.1	-0.193654	0.0588747	-3.28926	0.00100451	0.0332975	Ccl9
ENSMUSG00000025366.6	12309.2	-0.175708	0.0533887	-3.29111	0.000997939	0.0332975	Esyt1
ENSMUSG00000005583.8	9092.81	0.22424	0.0681261	3.29155	0.000996368	0.0332975	Mef2c
ENSMUSG00000042129.5	1314.31	-0.293356	0.0890877	-3.29289	0.000991635	0.0332975	Rassf4
ENSMUSG00000010142.6	2580.59	-0.229466	0.0698049	-3.28725	0.00101171	0.0332975	Tnfrsf13b
ENSMUSG00000026872.8	4425.29	0.223846	0.0680664	3.28865	0.0010067	0.0332975	Zeb2
ENSMUSG00000030748.7	3598.78	-0.213391	0.0649817	-3.28387	0.00102392	0.033581	Il4ra
ENSMUSG00000040297.7	1219.88	0.324138	0.0987661	3.28188	0.00103119	0.0335837	AI848100
ENSMUSG00000005506.9	3151.78	0.23762	0.0723905	3.28248	0.00102899	0.0335837	Celf1
ENSMUSG00000022439.3	13755.9	-0.172793	0.052671	-3.28061	0.00103583	0.0336178	Parvg
ENSMUSG00000054280.6	1556.35	0.277674	0.0847014	3.27827	0.00104445	0.0337803	C330019G07Rik
ENSMUSG00000026981.9	253.165	0.575164	0.175532	3.2767	0.0010503	0.0338521	Il1rn
ENSMUSG00000027630.8	2411.44	0.233731	0.0713816	3.27439	0.0010589	0.034012	Tbl1xr1
ENSMUSG00000047793.7	267.733	0.565085	0.172892	3.26842	0.00108149	0.0346187	Sned1
ENSMUSG00000069135.5	1451.44	0.275554	0.0843453	3.26698	0.00108702	0.0346772	Fgfr1op
ENSMUSG00000069516.6	11795.5	0.187718	0.0575594	3.26129	0.00110908	0.0351534	Lyz2
ENSMUSG00000045322.9	374.307	-0.486957	0.149319	-3.26119	0.00110947	0.0351534	Tlr9
ENSMUSG00000042271.7	932.872	0.352313	0.108261	3.25429	0.00113678	0.0358968	Nxt2
ENSMUSG00000035649.11	892.274	0.332877	0.102351	3.25232	0.00114465	0.0360238	Zcchc7
ENSMUSG00000002981.9	4567.62	-0.203529	0.0626009	-3.25122	0.00114913	0.0360433	Clptm1
ENSMUSG00000027522.8	2296.03	0.244724	0.0753091	3.24959	0.0011557	0.0361281	Stx16
ENSMUSG00000007892.7	19770.4	-0.181539	0.0559246	-3.24615	0.00116979	0.0364468	Rplp1
ENSMUSG00000040651.7	725.778	0.398739	0.122952	3.24304	0.0011826	0.0367234	D14Abb1e
ENSMUSG00000018425.10	3390.27	0.2522	0.077889	3.23794	0.00120396	0.0370321	Dhx40
ENSMUSG00000028760.9	7233.48	0.195716	0.0604525	3.23752	0.00120575	0.0370321	Eif4g3
ENSMUSG00000029004.9	3208.03	0.234683	0.0725026	3.23689	0.00120839	0.0370321	Mll5
ENSMUSG00000047407.10	858.996	0.353946	0.109254	3.23967	0.0011967	0.0370321	Tgif1
ENSMUSG00000071041.2	5322.33	-0.192632	0.0596212	-3.23093	0.00123389	0.0375284	Gm15210
ENSMUSG00000022346.8	2731.33	-0.234254	0.0724804	-3.23196	0.00122942	0.0375284	Myc
ENSMUSG00000036928.8	555.015	0.399732	0.123745	3.2303	0.00123663	0.0375284	Stag3
ENSMUSG00000024665.7	3507.28	-0.208944	0.0647559	-3.22664	0.00125251	0.0377652	Fads2
ENSMUSG00000038174.8	622.762	0.452199	0.140126	3.22709	0.00125057	0.0377652	Fam126b
ENSMUSG00000024338.8	9712.41	-0.181831	0.0564746	-3.2197	0.00128327	0.0385681	Psmb8
ENSMUSG00000037355.8	345.936	0.483549	0.150358	3.21599	0.00129997	0.0389449	4933407H18Rik
ENSMUSG00000026815.8	1983.08	-0.244341	0.0760033	-3.21488	0.00130499	0.0389705	Gfi1b
ENSMUSG00000062232.8	2949	0.228934	0.0712399	3.21356	0.001311	0.0390252	Rapgef2
ENSMUSG00000089672.2	508.335	0.470724	0.146584	3.21129	0.0013214	0.0391044	Gp49a
ENSMUSG00000032413.6	1086.68	0.300253	0.093503	3.21115	0.00132203	0.0391044	Rasa2
ENSMUSG00000038002.7	1754.54	0.274093	0.0853878	3.20997	0.00132747	0.0391414	Cramp1l
ENSMUSG00000006736.8	2158.95	-0.237663	0.0740762	-3.20836	0.00133493	0.0391506	Tspan31
ENSMUSG00000020128.8	1546.92	0.275353	0.0858307	3.2081	0.00133616	0.0391506	Vps54
ENSMUSG00000082286.4	1135.62	0.32984	0.102869	3.2064	0.00134406	0.0392592	Pisd-ps1
ENSMUSG00000030062.6	24150.2	-0.167239	0.0522271	-3.20215	0.00136407	0.0397194	Rpn1
ENSMUSG00000056124.5	1637.58	0.25801	0.0808059	3.19296	0.00140824	0.0408784	B4galt6
ENSMUSG00000031490.5	1809.68	-0.256531	0.0803873	-3.19119	0.00141689	0.0409119	Eif4ebp1
ENSMUSG00000020640.8	3198.87	0.250041	0.078379	3.19015	0.001422	0.0409119	Itsn2
ENSMUSG00000040483.9	202.378	0.608952	0.190892	3.19004	0.00142253	0.0409119	Xaf1
ENSMUSG00000082280.1	1667.3	-0.284445	0.0893964	-3.18184	0.00146344	0.0419593	Gm7901
ENSMUSG00000034422.8	684.059	0.36396	0.114474	3.17942	0.00147568	0.0421809	Parp14
ENSMUSG00000031278.6	1488.58	0.291158	0.0916127	3.17814	0.00148223	0.042239	Acsl4
ENSMUSG00000049076.8	2993.54	0.217124	0.0683625	3.17606	0.00149288	0.0424131	Acap2
ENSMUSG00000034297.8	2729.77	0.233359	0.073497	3.17508	0.00149794	0.0424279	Med13
ENSMUSG00000042599.8	1108.08	0.308343	0.0972702	3.16996	0.00152458	0.0427936	Jhdm1d
ENSMUSG00000051457.6	15616.1	-0.165655	0.0522474	-3.17059	0.00152128	0.0427936	Spn
ENSMUSG00000034723.5	2135.37	0.249684	0.0787501	3.17059	0.00152132	0.0427936	Tmx4
ENSMUSG00000033792.6	216.82	0.605844	0.191581	3.16234	0.00156506	0.0436676	Atp7a
ENSMUSG00000078773.4	591.726	0.391369	0.123758	3.16238	0.00156485	0.0436676	Rad54b
ENSMUSG00000013974.2	466.621	0.434418	0.137415	3.16135	0.0015704	0.0436862	1810033B17Rik
ENSMUSG00000046546.3	981.537	-0.318418	0.100807	-3.15869	0.00158482	0.0439298	Fam43a
ENSMUSG00000062604.6	1167.92	0.286216	0.090632	3.158	0.00158856	0.0439298	Srpk2
ENSMUSG00000015937.8	27585.8	-0.165727	0.0525038	-3.15647	0.00159689	0.0440298	H2afy
ENSMUSG00000027677.10	1228.71	0.32423	0.102756	3.15534	0.00160309	0.0440708	Ttc14
ENSMUSG00000035284.8	3463.52	0.206169	0.0654186	3.15153	0.00162416	0.0445193	Vps13c
ENSMUSG00000074800.3	4822.48	-0.20396	0.0647807	-3.14847	0.00164128	0.044857	Gm4149
ENSMUSG00000049878.6	580.736	0.376418	0.119597	3.14738	0.00164741	0.0448933	Rlf
ENSMUSG00000025651.8	5170.03	-0.200005	0.0635998	-3.14474	0.00166232	0.0451677	Uqcrc1
ENSMUSG00000066900.5	2876.28	-0.214295	0.0682586	-3.13946	0.00169262	0.0458577	Suds3
ENSMUSG00000073411.4	28436.1	-0.157745	0.0502705	-3.13793	0.00170145	0.0459638	H2-D1
ENSMUSG00000028820.7	16278.3	0.16619	0.0530535	3.1325	0.00173326	0.0466881	Sfpq
ENSMUSG00000054051.6	1062.27	0.314024	0.100318	3.13029	0.00174633	0.046905	Ercc6
ENSMUSG00000001281.3	1089.82	-0.314221	0.100557	-3.12482	0.00177917	0.0471101	Itgb7
ENSMUSG00000040021.6	1366.41	0.270088	0.0863911	3.12634	0.00176995	0.0471101	Lats1
ENSMUSG00000049647.3	1128.51	0.303422	0.0970801	3.12548	0.00177514	0.0471101	Purb
ENSMUSG00000041997.9	1263.68	0.275129	0.0879606	3.12787	0.00176078	0.0471101	Tlk1
ENSMUSG00000032555.3	7212.07	0.178366	0.057045	3.12676	0.00176742	0.0471101	Topbp1
ENSMUSG00000026615.8	7156.83	0.190948	0.0611767	3.12126	0.0018008	0.0475481	Eprs
ENSMUSG00000009079.10	9376.42	0.180785	0.0579721	3.11848	0.00181785	0.0478633	Ewsr1
ENSMUSG00000061244.7	1422.26	0.307086	0.0985395	3.11638	0.00183088	0.0479357	Exoc5
ENSMUSG00000069367.2	4763.8	-0.194731	0.0624705	-3.11717	0.00182597	0.0479357	Rps2-ps10
ENSMUSG00000009741.8	2468.42	0.24035	0.0771452	3.11556	0.00183599	0.0479357	Ubp1
ENSMUSG00000020074.5	2582.25	0.250318	0.080418	3.11271	0.00185376	0.048265	Ccar1
ENSMUSG00000025612.5	6270.27	0.194929	0.062696	3.10912	0.00187644	0.0485846	Bach1
ENSMUSG00000020859.9	2343.24	0.231439	0.0744344	3.1093	0.00187529	0.0485846	Spag9
ENSMUSG00000036882.5	491.332	0.439421	0.141577	3.10376	0.00191081	0.0492572	Arhgap33
ENSMUSG00000006445.3	898.633	-0.312206	0.1006	-3.10342	0.00191295	0.0492572	Epha2
ENSMUSG00000002603.9	14941.9	-0.185767	0.0598759	-3.10254	0.00191869	0.0492692	Tgfb1
ENSMUSG00000038733.6	12738.1	0.165386	0.0533978	3.09724	0.00195332	0.0500209	Wdr26
ENSMUSG00000034218.8	1242.88	0.297294	0.0962424	3.08901	0.00200822	0.0512059	Atm
ENSMUSG00000006782.10	1958.01	-0.234538	0.0759351	-3.08867	0.00201054	0.0512059	Cnp
ENSMUSG00000025403.3	11683.5	-0.164876	0.0534524	-3.08454	0.00203864	0.0517154	Shmt2
ENSMUSG00000056579.9	3264.43	0.215674	0.0699307	3.08411	0.00204162	0.0517154	Tug1
ENSMUSG00000034156.9	1281.57	0.725304	0.235243	3.08321	0.00204784	0.0517328	Bzrap1
ENSMUSG00000029208.9	760.205	0.334081	0.108575	3.07696	0.00209126	0.0526873	Guf1
ENSMUSG00000024843.9	1093.06	0.300783	0.0979664	3.07026	0.0021387	0.0535937	Chka
ENSMUSG00000060419.6	17293	-0.166693	0.0542788	-3.07106	0.00213299	0.0535937	Rps16-ps2
ENSMUSG00000052684.3	1476.11	-1.13361	0.369489	-3.06804	0.00215464	0.0538488	Jun
ENSMUSG00000024483.11	3341.75	0.202392	0.0660961	3.06208	0.00219805	0.0547216	Ankhd1
ENSMUSG00000026068.5	861.61	0.343142	0.112161	3.05937	0.00221806	0.0547216	Il18rap
ENSMUSG00000015880.9	1697.09	0.286047	0.0934616	3.06058	0.00220908	0.0547216	Ncapg
ENSMUSG00000020275.8	595.104	0.359072	0.117372	3.05926	0.00221884	0.0547216	Rel
ENSMUSG00000029920.6	1014.71	0.313114	0.102278	3.0614	0.00220302	0.0547216	Smarcad1
ENSMUSG00000022020.7	968.165	0.297348	0.0972341	3.05806	0.00222773	0.0547963	Naa16
ENSMUSG00000020530.7	2639.27	0.216722	0.070956	3.05431	0.00225578	0.0551957	Ggnbp2
ENSMUSG00000027177.8	3084.12	0.216181	0.0707669	3.05483	0.00225189	0.0551957	Hipk3
ENSMUSG00000053510.6	5666.6	0.179377	0.0587821	3.05156	0.00227658	0.0555592	Nrd1
ENSMUSG00000031820.8	2314.14	-0.233553	0.076674	-3.04605	0.00231866	0.0564387	5430437P03Rik
ENSMUSG00000046006.5	5128.51	-0.184774	0.0607546	-3.04133	0.00235539	0.0568885	Gapt
ENSMUSG00000073664.4	305.432	0.521693	0.171527	3.04147	0.00235424	0.0568885	Nbeal1
ENSMUSG00000056537.5	2211.19	0.257692	0.0846944	3.04262	0.00234531	0.0568885	Rlim
ENSMUSG00000060510.7	831.391	0.310499	0.102164	3.03922	0.00237192	0.05714	Zfp266
ENSMUSG00000060143.5	3162.31	-0.218574	0.0719687	-3.03708	0.00238885	0.0573998	Gm10076
ENSMUSG00000037243.10	478.409	0.417846	0.137628	3.03605	0.00239698	0.0574476	Zfp692
ENSMUSG00000071419.6	2939.16	-0.224557	0.0740114	-3.03408	0.00241269	0.0576762	Rps15-ps2
ENSMUSG00000029616.9	7878.19	-0.169464	0.0558982	-3.03166	0.00243211	0.0579922	Erp29
ENSMUSG00000040212.5	3795.04	-0.192329	0.0634747	-3.03001	0.00244545	0.0581418	Emp3
ENSMUSG00000082575.1	2703.18	-0.221518	0.0731241	-3.02935	0.00245082	0.0581418	Gm13050
ENSMUSG00000029202.8	5987.6	0.203538	0.0672267	3.02764	0.00246471	0.0583231	Pds5a
ENSMUSG00000056888.5	10824.8	-0.164091	0.0542199	-3.0264	0.00247487	0.0584156	Glipr1
ENSMUSG00000036181.1	396.341	-0.470258	0.155509	-3.02398	0.00249472	0.0587359	Hist1h1c
ENSMUSG00000042082.5	1548.77	0.254845	0.0843514	3.02123	0.00251753	0.0589127	Arsb
ENSMUSG00000037400.10	8265.78	0.189622	0.0628058	3.01918	0.00253462	0.0589127	Atp11b
ENSMUSG00000022884.8	6026.68	0.191583	0.0634118	3.02125	0.0025173	0.0589127	Eif4a2
ENSMUSG00000036097.6	1682.08	0.256527	0.0849211	3.02077	0.00252131	0.0589127	Fam178a
ENSMUSG00000037966.9	3540.36	-0.196453	0.0651206	-3.01676	0.00255494	0.0589127	Ninj1
ENSMUSG00000078348.3	1594.42	-0.263054	0.0872091	-3.01636	0.00255828	0.0589127	Sf3b5
ENSMUSG00000035208.9	305.672	0.528695	0.175068	3.01994	0.00252826	0.0589127	Slfn8
ENSMUSG00000024054.5	3111.67	0.240768	0.0798228	3.01628	0.00255896	0.0589127	Smchd1
ENSMUSG00000039531.6	358.626	0.441713	0.146428	3.01658	0.00255644	0.0589127	Zufsp
ENSMUSG00000029771.5	1052.59	-0.291956	0.0968285	-3.01518	0.00256823	0.0589809	Irf5
ENSMUSG00000048163.8	6541.81	-0.175385	0.0582886	-3.00891	0.0026219	0.059919	Selplg
ENSMUSG00000036572.9	626.775	0.348344	0.115758	3.00925	0.00261894	0.059919	Upf3b
ENSMUSG00000000753.8	488.72	-0.39484	0.131455	-3.00362	0.00266785	0.0606724	Serpinf1
ENSMUSG00000052707.6	2536.05	0.21097	0.0702301	3.00399	0.00266465	0.0606724	Tnrc6a
ENSMUSG00000029267.10	2222.49	0.223067	0.074328	3.00111	0.00268995	0.0610267	Mtf2
ENSMUSG00000022194.9	1034.26	0.30537	0.102051	2.99233	0.00276855	0.0626576	Pabpn1
ENSMUSG00000003484.4	521.796	-0.374054	0.125173	-2.98829	0.00280544	0.0631075	Cyp4f18
ENSMUSG00000021488.6	4524.21	0.183438	0.0613929	2.98794	0.00280868	0.0631075	Nsd1
ENSMUSG00000058013.7	3852.42	0.190656	0.0638039	2.98816	0.00280664	0.0631075	Sept11
ENSMUSG00000020564.9	2134.84	0.221227	0.0741937	2.98175	0.00286604	0.0641129	Atxn7l1
ENSMUSG00000026896.7	448.631	0.466847	0.156574	2.98163	0.00286714	0.0641129	Ifih1
ENSMUSG00000081094.1	11554.9	-0.179089	0.0601224	-2.97874	0.00289438	0.0644137	Rpl19-ps11
ENSMUSG00000009470.9	6886.07	0.180671	0.0606417	2.97932	0.00288893	0.0644137	Tnpo1
ENSMUSG00000021182.7	1890.77	0.243323	0.081767	2.97581	0.00292212	0.0648767	Ccdc88c
ENSMUSG00000043881.7	3330.6	0.213436	0.0717582	2.97438	0.00293578	0.0650254	Kbtbd7
ENSMUSG00000032312.6	6608.32	-0.177727	0.0598205	-2.971	0.00296827	0.0651899	Csk
ENSMUSG00000020719.7	30637.3	0.150833	0.0507654	2.97117	0.00296665	0.0651899	Ddx5
ENSMUSG00000035620.7	609.641	0.38793	0.130585	2.97071	0.0029711	0.0651899	Ric8b
ENSMUSG00000053774.7	1617.52	0.247672	0.0833171	2.97265	0.00295241	0.0651899	Ubxn7
ENSMUSG00000034109.9	1448.12	0.278229	0.0936894	2.96969	0.00298096	0.0652531	Golim4
ENSMUSG00000025234.5	3765.72	0.199887	0.0673549	2.96767	0.00300068	0.0653785	Arih1
ENSMUSG00000040721.7	279.637	-0.506321	0.17059	-2.96805	0.00299693	0.0653785	Zfhx2
ENSMUSG00000059775.3	6607.81	-0.181363	0.0612168	-2.96263	0.00305018	0.0663025	Rps26-ps1
ENSMUSG00000038121.6	858.974	0.301568	0.101835	2.96135	0.00306297	0.066426	4933403F05Rik
ENSMUSG00000038828.7	2022.15	-0.221581	0.0748729	-2.95943	0.00308204	0.0666848	Tmem214
ENSMUSG00000023852.7	2270.56	0.229108	0.0774944	2.95645	0.00311203	0.0671783	Chd1
ENSMUSG00000024542.7	2519.25	0.21334	0.0722273	2.95373	0.00313962	0.0676175	Cep192
ENSMUSG00000047370.4	757.894	-0.319882	0.108337	-2.95265	0.0031506	0.0676981	Gm7367
ENSMUSG00000028874.8	321.98	0.465463	0.157891	2.94801	0.00319832	0.0685657	Fgr
ENSMUSG00000030557.9	1204.76	0.272092	0.0923903	2.94502	0.00322929	0.0690713	Mef2a
ENSMUSG00000029249.8	1365.25	0.253048	0.086074	2.93989	0.00328331	0.0700572	Rest
ENSMUSG00000042625.9	3882.72	0.216667	0.0737157	2.93922	0.00329037	0.0700572	Safb2
ENSMUSG00000020812.11	582.736	0.377976	0.128978	2.93056	0.00338353	0.0714126	1810032O08Rik
ENSMUSG00000047798.8	384.033	0.478551	0.163344	2.9297	0.00339284	0.0714126	Cd300lf
ENSMUSG00000020300.7	1142.34	0.275634	0.0940046	2.93214	0.00336638	0.0714126	Cpeb4
ENSMUSG00000049932.2	6572.2	-0.176266	0.060158	-2.93006	0.003389	0.0714126	H2afx
ENSMUSG00000003348.9	3978.95	-0.185168	0.0632174	-2.92906	0.00339987	0.0714126	Mob3a
ENSMUSG00000026409.7	783.857	0.307299	0.104902	2.92938	0.00339637	0.0714126	Pfkfb2
ENSMUSG00000024754.6	2088.13	0.218508	0.0746323	2.92779	0.00341376	0.0715435	Tmem2
ENSMUSG00000028522.10	1836.73	0.231831	0.0792925	2.92374	0.00345848	0.0723186	Mier1
ENSMUSG00000074746.2	2463.42	0.233193	0.0799177	2.91791	0.00352382	0.0735204	Pdzd8
ENSMUSG00000028798.10	4175.2	-0.184164	0.0631674	-2.91549	0.00355132	0.0739291	Eif3i
ENSMUSG00000033671.10	2806.97	0.23219	0.0797715	2.91069	0.0036063	0.0749068	Cep350
ENSMUSG00000037172.8	1444.33	0.250913	0.0863553	2.90558	0.0036657	0.0758735	E330009J07Rik
ENSMUSG00000027397.8	1962.33	0.240191	0.0826734	2.90529	0.00366907	0.0758735	Slc20a1
ENSMUSG00000022139.9	1399.86	0.276692	0.0953145	2.90293	0.00369685	0.0762372	Mbnl2
ENSMUSG00000022797.9	5345.38	0.193727	0.0667469	2.90242	0.00370297	0.0762372	Tfrc
ENSMUSG00000026849.11	1523.44	-0.237686	0.081978	-2.89939	0.00373886	0.0768068	Tor1a
ENSMUSG00000067148.8	929.745	-0.283903	0.0979979	-2.89704	0.00376706	0.077212	Polr1c
ENSMUSG00000013707.3	1529.72	-0.250906	0.0866374	-2.89605	0.00377893	0.077212	Tnfaip8l2
ENSMUSG00000019505.6	10608.2	-0.163243	0.0563747	-2.89568	0.00378336	0.077212	Ubb
ENSMUSG00000021713.7	486.459	0.386896	0.133741	2.89287	0.00381737	0.0777362	Ppwd1
ENSMUSG00000030591.9	5108.87	-0.175063	0.0605458	-2.89142	0.0038351	0.0779276	Psmd8
ENSMUSG00000028214.7	1138.4	-0.26841	0.0930031	-2.88604	0.00390127	0.0791001	Gem
ENSMUSG00000048271.8	3920.78	0.191106	0.0662798	2.88332	0.00393502	0.0796118	Rbm33
ENSMUSG00000015143.8	1144.21	0.267983	0.0931749	2.87613	0.00402583	0.0800851	Actn1
ENSMUSG00000050812.11	5473.44	0.178591	0.0620968	2.876	0.00402745	0.0800851	AI314180
ENSMUSG00000053898.6	2355.7	-0.212844	0.0739388	-2.87864	0.00399388	0.0800851	Ech1
ENSMUSG00000064215.7	2453.59	0.216127	0.0751482	2.87602	0.0040273	0.0800851	Ifi27l1
ENSMUSG00000026223.9	2039.23	-0.215461	0.0749332	-2.87537	0.00403553	0.0800851	Itm2c
ENSMUSG00000071076.4	2267.33	-0.253297	0.0880616	-2.87636	0.00402285	0.0800851	Jund
ENSMUSG00000058603.8	7936.09	-0.173251	0.0602501	-2.87553	0.00403348	0.0800851	Rpl28-ps1
ENSMUSG00000032180.9	427.887	-0.392917	0.13664	-2.87557	0.00403299	0.0800851	Tmed1
ENSMUSG00000022858.9	4230.47	0.214161	0.074423	2.87761	0.00400694	0.0800851	Tra2b
ENSMUSG00000045411.9	1989.29	0.225181	0.0784171	2.87159	0.00408419	0.0801994	2410002F23Rik
ENSMUSG00000090723.1	5168.3	-0.185262	0.0645014	-2.87221	0.00407609	0.0801994	Gm9625
ENSMUSG00000044702.7	457.21	0.393181	0.13681	2.87393	0.00405399	0.0801994	Palb2
ENSMUSG00000024498.8	3937.15	0.191772	0.0667464	2.87314	0.00406415	0.0801994	Tcerg1
ENSMUSG00000038393.7	4651.38	-0.186411	0.0648927	-2.8726	0.00407112	0.0801994	Txnip
ENSMUSG00000052296.6	15275	-0.156223	0.0544458	-2.86932	0.00411353	0.0806062	Ppp6r1
ENSMUSG00000030413.6	683.731	0.35015	0.122097	2.8678	0.00413339	0.0808259	Pglyrp1
ENSMUSG00000021500.8	4368.61	0.1905	0.0664965	2.86481	0.00417258	0.0814219	Ddx46
ENSMUSG00000063457.7	14139.7	-0.175424	0.0613426	-2.85974	0.00423985	0.0825623	Rps15
ENSMUSG00000028613.8	2695.25	0.214506	0.0750522	2.8581	0.00426187	0.0828186	Lrp8
ENSMUSG00000052212.5	383.436	0.409588	0.143439	2.8555	0.00429696	0.0833272	Cd177
ENSMUSG00000034724.11	4510.88	0.197077	0.0690536	2.85397	0.0043177	0.0833834	Cnot6l
ENSMUSG00000037674.7	3523.81	0.196329	0.068782	2.85436	0.00431234	0.0833834	Rfx7
ENSMUSG00000000552.8	683.728	-0.352538	0.123645	-2.85122	0.00435524	0.0839349	Zfp385a
ENSMUSG00000024921.8	1590.4	0.231668	0.0813111	2.84916	0.00438353	0.0843064	Smarca2
ENSMUSG00000079481.4	2111.05	0.213837	0.075075	2.84831	0.00439517	0.0843567	Nhsl2
ENSMUSG00000020189.7	8686.55	0.201466	0.0708326	2.84425	0.00445159	0.0852644	Osbpl8
ENSMUSG00000041966.12	546.28	0.354074	0.124627	2.84107	0.00449629	0.0858747	Dcaf17
ENSMUSG00000062933.5	13167.6	-0.176992	0.0623064	-2.84067	0.00450183	0.0858747	Gm10123
ENSMUSG00000001525.9	34642.1	-0.139923	0.0493035	-2.83799	0.00453979	0.0864225	Tubb5
ENSMUSG00000038708.8	2338.32	0.217696	0.0767252	2.83735	0.00454904	0.0864225	Golga4
ENSMUSG00000060376.6	2365.53	-0.204639	0.0722116	-2.83388	0.00459869	0.0865233	Bckdha
ENSMUSG00000020385.10	1319.21	0.27727	0.097785	2.83551	0.00457525	0.0865233	Clk4
ENSMUSG00000081051.2	14481.4	-0.151649	0.0534975	-2.83469	0.00458696	0.0865233	Gm15427
ENSMUSG00000034353.7	4948.65	-0.172618	0.0608769	-2.83552	0.00457508	0.0865233	Ramp1
ENSMUSG00000021957.6	28924	-0.142007	0.0501129	-2.83374	0.00460063	0.0865233	Tkt
ENSMUSG00000067274.4	43173.5	-0.147511	0.0520725	-2.8328	0.00461429	0.086606	Rplp0
ENSMUSG00000029798.8	431.628	0.43341	0.153058	2.83167	0.00463057	0.0866576	Herc6
ENSMUSG00000037487.6	5925.13	0.16444	0.058079	2.83132	0.00463558	0.0866576	Ubr5
ENSMUSG00000062647.10	4519.71	-0.181675	0.0642911	-2.82581	0.00471612	0.0879872	Rpl7a
ENSMUSG00000042408.7	453.185	0.375849	0.133059	2.82468	0.00473285	0.0881234	Zmym6
ENSMUSG00000027806.4	2137.6	0.208993	0.0740639	2.8218	0.00477554	0.0887416	Tsc22d2
ENSMUSG00000005161.9	2846.18	-0.197922	0.0701769	-2.82033	0.00479741	0.088971	Prdx2
ENSMUSG00000047368.3	2578.46	0.206264	0.0731704	2.81895	0.00481804	0.0891768	Fam108b
ENSMUSG00000021938.5	1429.62	0.240124	0.0852475	2.81679	0.00485064	0.089426	Pspc1
ENSMUSG00000054414.3	1245.95	0.25312	0.0898466	2.81725	0.00484371	0.089426	Slc30a7
ENSMUSG00000034480.11	1063.47	0.319679	0.113554	2.8152	0.00487464	0.0896915	Diap2
ENSMUSG00000035064.9	6431.81	-0.164863	0.0586126	-2.81275	0.00491196	0.0898475	Eef2k
ENSMUSG00000024063.6	993.218	-0.273325	0.0971687	-2.8129	0.00490976	0.0898475	Lbh
ENSMUSG00000025860.8	3239.73	0.215368	0.0765537	2.81329	0.00490374	0.0898475	Xiap
ENSMUSG00000003970.8	33786.5	-0.138672	0.0493364	-2.81075	0.0049426	0.0901866	Rpl8
ENSMUSG00000030337.10	1085.92	0.263809	0.0938728	2.81028	0.00494979	0.0901866	Vamp1
ENSMUSG00000022867.8	2111.37	0.239924	0.0854407	2.80808	0.00498384	0.0906303	Usp25
ENSMUSG00000028927.6	5340.92	-0.193872	0.0690778	-2.80658	0.00500709	0.0908763	Padi2
ENSMUSG00000027366.6	2184.7	0.209683	0.0748918	2.79981	0.00511329	0.092566	2010106G01Rik
ENSMUSG00000039286.6	2118.76	0.218095	0.0779301	2.7986	0.00513254	0.092566	Fndc3b
ENSMUSG00000039997.10	336.276	0.446574	0.159597	2.79814	0.00513981	0.092566	Ifi203
ENSMUSG00000067288.6	1655.51	-0.233746	0.0835105	-2.799	0.00512606	0.092566	Rps28
ENSMUSG00000053565.8	4571.7	-0.176721	0.0631776	-2.79721	0.00515461	0.092654	Eif3k
ENSMUSG00000040111.8	1765.36	0.245736	0.0879822	2.79302	0.00522184	0.0936824	Gramd1b
ENSMUSG00000045055.4	1547.87	-0.240382	0.0861826	-2.78922	0.00528353	0.0946076	Rpsa-ps2
ENSMUSG00000031631.8	677.915	0.343936	0.123398	2.78721	0.00531648	0.0950155	4933411K20Rik
ENSMUSG00000074129.5	27842	-0.148769	0.0534581	-2.7829	0.00538749	0.0961009	Rpl13a
ENSMUSG00000040997.6	2300.55	-0.200249	0.0721282	-2.77629	0.00549833	0.0973567	Abhd4
ENSMUSG00000008036.9	2622.82	-0.194578	0.0700875	-2.77622	0.00549955	0.0973567	Ap2s1
ENSMUSG00000022557.9	3584.33	-0.185758	0.0668808	-2.77746	0.00547862	0.0973567	Bop1
ENSMUSG00000030653.9	1379.74	0.244698	0.0881067	2.77729	0.00548143	0.0973567	Pde2a
ENSMUSG00000002428.6	994.349	0.30387	0.109498	2.77512	0.00551809	0.0975002	Hltf
ENSMUSG00000063524.7	7561.63	-0.157982	0.056963	-2.77341	0.00554721	0.0975044	Eno1
ENSMUSG00000084106.2	9142.69	-0.162165	0.0585385	-2.77022	0.00560178	0.0975044	Gm6136
ENSMUSG00000063856.5	21347.3	-0.146887	0.0530021	-2.77134	0.00558262	0.0975044	Gpx1
ENSMUSG00000037795.8	2474.79	0.207526	0.0748159	2.77382	0.00554028	0.0975044	N4bp2
ENSMUSG00000020936.8	4027.02	-0.173985	0.0627709	-2.77175	0.00557559	0.0975044	Nmt1
ENSMUSG00000019907.8	2554.91	0.231228	0.0834599	2.77053	0.00559645	0.0975044	Ppp1r12a
ENSMUSG00000054675.5	1656.95	-0.240781	0.0868793	-2.77144	0.00558086	0.0975044	Tmem119
ENSMUSG00000071757.4	494.52	-0.357247	0.12888	-2.77193	0.00557254	0.0975044	Zhx2
ENSMUSG00000031592.8	2282.8	0.250441	0.0905153	2.76683	0.00566037	0.0982918	Pcm1
ENSMUSG00000012848.8	24695.7	-0.171107	0.0618602	-2.76603	0.00567436	0.0982918	Rps5
ENSMUSG00000026219.8	7765.95	0.184666	0.0667679	2.76579	0.00567857	0.0982918	Trip12
ENSMUSG00000030688.7	559.842	-0.342739	0.12405	-2.76292	0.00572875	0.0989772	Stard10
ENSMUSG00000046691.5	5163.2	-0.166979	0.0604522	-2.76217	0.00574192	0.0990147	Chtf8
ENSMUSG00000039960.4	295.25	0.442009	0.160056	2.76159	0.00575211	0.0990147	Rhou
ENSMUSG00000020561.7	713.545	0.38385	0.139042	2.76067	0.00576824	0.0991098	Twistnb
ENSMUSG00000027770.4	1269.23	0.242034	0.0877593	2.75793	0.00581695	0.099472	Dhx36
ENSMUSG00000035247.8	6011.52	0.177759	0.0644596	2.75768	0.00582125	0.099472	Hectd1
ENSMUSG00000057143.7	740.12	0.353481	0.128137	2.75861	0.00580482	0.099472	Trim12c
ENSMUSG00000017418.7	379.687	0.400132	0.145274	2.75433	0.00588132	0.10027	Arl5b
ENSMUSG00000072692.4	8075.35	-0.168763	0.061282	-2.75388	0.00588942	0.10027	Gm13826
ENSMUSG00000021134.9	7222.27	0.173296	0.062966	2.75221	0.00591946	0.100599	Srsf5
ENSMUSG00000083992.1	9740.55	-0.161675	0.0587593	-2.75148	0.00593264	0.10064	Gm11478
ENSMUSG00000025228.4	3844.66	-0.177731	0.0646275	-2.75008	0.00595805	0.100887	Actr1a
ENSMUSG00000028034.8	5454.6	0.19284	0.0701824	2.7477	0.00600154	0.10144	Fubp1
ENSMUSG00000005371.8	1079.3	0.255817	0.0932954	2.74201	0.00610639	0.103026	Fbxo11
ENSMUSG00000085385.1	768.052	0.304983	0.111326	2.73955	0.00615241	0.103615	9430008C03Rik
ENSMUSG00000044098.8	1855.62	0.225137	0.0822175	2.73831	0.00617553	0.103818	Rsbn1
ENSMUSG00000036403.9	635.887	0.314148	0.114786	2.73682	0.00620366	0.10406	Cep135
ENSMUSG00000035696.9	2542.67	0.192196	0.0702376	2.73637	0.00621221	0.10406	Rnf38
ENSMUSG00000035759.3	229.134	0.512385	0.187653	2.73049	0.00632399	0.105404	Bbs10
ENSMUSG00000063273.6	3546.02	0.221391	0.0810845	2.73037	0.0063263	0.105404	Naa15
ENSMUSG00000046230.8	979.482	0.330863	0.121158	2.73083	0.00631755	0.105404	Vps13a
ENSMUSG00000021484.7	8892.4	-0.149126	0.0546549	-2.7285	0.0063623	0.105816	Lman2
ENSMUSG00000059070.8	5908.51	-0.159882	0.0586414	-2.72644	0.00640217	0.106131	Rpl18
ENSMUSG00000035623.8	1121.67	0.321794	0.118031	2.72635	0.00640395	0.106131	Rsf1
ENSMUSG00000019158.8	987.937	-0.276011	0.101429	-2.72122	0.00650412	0.1076	Tmem160
ENSMUSG00000036435.7	1446.71	0.237102	0.08716	2.72031	0.00652208	0.107707	Exoc1
ENSMUSG00000030695.7	26297.4	-0.147921	0.0544342	-2.71743	0.0065792	0.108096	Aldoa
ENSMUSG00000043019.5	1837.3	0.21106	0.0776505	2.71807	0.00656632	0.108096	Edem3
ENSMUSG00000048000.8	2832.1	0.186467	0.0686205	2.71737	0.00658034	0.108096	Gigyf2
ENSMUSG00000028893.8	1797.07	-0.212054	0.078074	-2.71607	0.00660616	0.108329	Sesn2
ENSMUSG00000027665.7	1283.35	0.24087	0.0887098	2.71526	0.0066223	0.108404	Pik3ca
ENSMUSG00000034252.7	2324.67	0.234766	0.0864934	2.71426	0.00664242	0.108543	Senp6
ENSMUSG00000028649.10	11290.3	0.156847	0.0578467	2.71142	0.00669964	0.109287	Macf1
ENSMUSG00000034158.8	2565.78	0.204923	0.0756549	2.70865	0.00675574	0.11001	Lrrc58
ENSMUSG00000034801.6	1695.53	0.219312	0.0810263	2.70667	0.0067961	0.110283	Sos2
ENSMUSG00000020290.8	5605.16	0.196991	0.0727765	2.7068	0.00679352	0.110283	Xpo1
ENSMUSG00000035356.9	205.625	0.558933	0.206687	2.70425	0.00684578	0.110897	Nfkbiz
ENSMUSG00000047789.3	428.071	0.378576	0.14012	2.70179	0.00689667	0.111528	Slc38a9
ENSMUSG00000034926.3	8417.36	-0.153437	0.0568173	-2.70054	0.00692267	0.111562	Dhcr24
ENSMUSG00000017548.9	5396.09	0.206294	0.0763744	2.70109	0.00691124	0.111562	Suz12
ENSMUSG00000022698.10	4511.83	0.200092	0.0741504	2.69846	0.00696608	0.112069	Naa50
ENSMUSG00000031818.5	8171.41	-0.155107	0.057615	-2.69212	0.00709993	0.113635	Cox4i1
ENSMUSG00000030659.7	538.63	0.363549	0.13503	2.69237	0.00709466	0.113635	Nucb2
ENSMUSG00000014956.9	5784.07	0.177087	0.0657652	2.69272	0.00708716	0.113635	Ppp1cb
ENSMUSG00000062949.6	1016.98	0.307952	0.114453	2.69064	0.00713156	0.113752	Atp11c
ENSMUSG00000026623.10	3343.63	0.190358	0.0707463	2.69071	0.00713002	0.113752	Lpgat1
ENSMUSG00000032383.6	4829.75	-0.168651	0.0627872	-2.68608	0.0072296	0.114924	Ppib
ENSMUSG00000021027.8	2489.8	0.204692	0.0761995	2.68627	0.00722547	0.114924	Ralgapa1
ENSMUSG00000028514.9	2812.75	0.185761	0.0691747	2.68539	0.00724446	0.114934	Usp24
ENSMUSG00000066798.3	533.022	0.347728	0.129512	2.68491	0.00725483	0.114934	Zbtb6
ENSMUSG00000037234.9	1466.71	0.258079	0.0962139	2.68235	0.00731068	0.115623	Hook3
ENSMUSG00000026031.9	1875.5	0.225737	0.0842774	2.67851	0.00739515	0.116483	Cflar
ENSMUSG00000091845.1	1637.76	-0.217905	0.0813554	-2.67844	0.00739662	0.116483	Gm4604
ENSMUSG00000026879.7	10515.9	-0.157886	0.0589529	-2.67817	0.00740247	0.116483	Gsn
ENSMUSG00000066258.6	660.371	0.310218	0.115923	2.67607	0.00744914	0.11702	Trim12a
ENSMUSG00000025239.2	1807.97	-0.215407	0.0805295	-2.67489	0.00747547	0.117237	Limd1
ENSMUSG00000003814.8	56170.1	-0.12929	0.0483997	-2.6713	0.00755576	0.118298	Calr
ENSMUSG00000035569.9	7963.46	0.165413	0.0619538	2.66994	0.00758652	0.118313	Ankrd11
ENSMUSG00000018661.10	1515.16	-0.22831	0.0855271	-2.66944	0.00759776	0.118313	Cog1
ENSMUSG00000001403.7	3026.1	-0.181598	0.0680393	-2.66902	0.00760738	0.118313	Ube2c
ENSMUSG00000041408.10	4157.35	0.203914	0.0763886	2.66943	0.00759793	0.118313	Wapal
ENSMUSG00000026491.7	2083.93	0.198656	0.0745604	2.66437	0.00771335	0.119563	Ahctf1
ENSMUSG00000021413.7	2327.59	0.235967	0.0885475	2.66487	0.00770191	0.119563	Prpf4b
ENSMUSG00000032035.7	203.555	0.50603	0.190086	2.66211	0.00776518	0.120167	Ets1
ENSMUSG00000014763.7	659.751	-0.298721	0.112306	-2.65988	0.00781689	0.120768	Fam120b
ENSMUSG00000034330.9	10283.5	-0.149677	0.0563679	-2.65536	0.00792247	0.122197	Plcg2
ENSMUSG00000040459.9	2602.8	0.185413	0.0698468	2.65457	0.00794093	0.12228	Arglu1
ENSMUSG00000023067.7	6818.58	-0.180244	0.0679325	-2.65328	0.0079713	0.122506	Cdkn1a
ENSMUSG00000001924.9	16240.2	-0.139428	0.052558	-2.65284	0.00798182	0.122506	Uba1
ENSMUSG00000081406.2	12617.2	-0.148555	0.0560342	-2.65115	0.00802176	0.122897	Gm13654
ENSMUSG00000067870.2	5234.42	-0.202051	0.076235	-2.65037	0.00804039	0.122897	Gm8759
ENSMUSG00000070691.4	5054.56	-0.170814	0.0644555	-2.6501	0.00804677	0.122897	Runx3
ENSMUSG00000039536.8	14574.5	0.140932	0.0531917	2.64952	0.00806059	0.122908	Stau1
ENSMUSG00000026103.8	3392.58	0.201824	0.0762054	2.64842	0.00808683	0.122969	Gls
ENSMUSG00000047554.7	422.506	0.367104	0.138621	2.64825	0.00809096	0.122969	Tmem41b
ENSMUSG00000031029.6	11609.1	-0.147136	0.0556608	-2.64343	0.00820695	0.12453	Eif3f
ENSMUSG00000034653.8	482.076	0.370983	0.14046	2.6412	0.00826133	0.125152	Ythdc2
ENSMUSG00000021495.7	1425.64	0.245444	0.0929636	2.64022	0.00828529	0.125312	Fam193b
ENSMUSG00000051256.9	906.538	-0.262502	0.099491	-2.63846	0.00832847	0.125558	Jagn1
ENSMUSG00000078942.3	1066.59	0.24817	0.0940461	2.63881	0.00831968	0.125558	Naip6
ENSMUSG00000066026.7	936.301	-0.262355	0.0995131	-2.63639	0.00837938	0.12592	Dhrs3
ENSMUSG00000070713.3	3146.75	-0.176958	0.0671106	-2.63682	0.00836876	0.12592	Gm10282
ENSMUSG00000057863.5	3926.67	-0.184203	0.0699545	-2.63318	0.00845906	0.12671	Rpl36
ENSMUSG00000031662.7	1511.43	-0.217509	0.0825925	-2.63352	0.00845059	0.12671	Snx20
ENSMUSG00000022788.9	2761.47	0.231909	0.0881711	2.63022	0.00853296	0.127612	Fgd4
ENSMUSG00000001029.9	1889.38	-0.219775	0.0835837	-2.6294	0.00855365	0.127717	Icam2
ENSMUSG00000063427.6	7155	-0.149376	0.0568337	-2.6283	0.00858118	0.127906	Gm8017
ENSMUSG00000044533.9	18232.8	-0.136728	0.052031	-2.62781	0.00859364	0.127906	Rps2
ENSMUSG00000050357.7	206.378	0.544747	0.20735	2.62718	0.00860953	0.127938	Rltpr
ENSMUSG00000063663.5	762.911	0.338223	0.128873	2.62447	0.00867828	0.128755	Brwd3
ENSMUSG00000025821.8	1011.51	-0.252972	0.0964146	-2.6238	0.00869556	0.128807	Zfp282
ENSMUSG00000025737.5	907.759	-0.274008	0.10449	-2.62234	0.00873291	0.129156	Wdr24
ENSMUSG00000067369.6	1056.69	-0.251813	0.0960623	-2.62135	0.00875813	0.129324	Trmt2b
ENSMUSG00000041935.9	1274.53	0.231762	0.0885595	2.61702	0.00887006	0.129751	AW549877
ENSMUSG00000025958.7	2188.53	0.22422	0.0856567	2.61766	0.00885354	0.129751	Creb1
ENSMUSG00000032040.9	1378.92	-0.225454	0.0861495	-2.61701	0.0088703	0.129751	Dcps
ENSMUSG00000040415.9	741.585	0.310236	0.11846	2.61891	0.00882125	0.129751	Dtx3
ENSMUSG00000084956.1	1875.43	0.228325	0.0871978	2.61847	0.0088325	0.129751	Gm16194
ENSMUSG00000021704.7	485.474	0.378475	0.144567	2.61798	0.00884519	0.129751	Mtx3
ENSMUSG00000071644.4	5486.21	-0.153692	0.0588576	-2.61125	0.00902124	0.131035	Eef1g
ENSMUSG00000031608.7	1002.31	0.249683	0.0956666	2.60992	0.00905622	0.131035	Galnt7
ENSMUSG00000028114.10	822.774	0.267912	0.102645	2.61008	0.00905204	0.131035	Mettl14
ENSMUSG00000005125.6	2297.12	-0.191885	0.0734671	-2.61185	0.00900532	0.131035	Ndrg1
ENSMUSG00000041881.6	1454.76	-0.227905	0.0872531	-2.612	0.00900149	0.131035	Ndufa7
ENSMUSG00000049625.4	10054.5	-0.141138	0.0540716	-2.6102	0.00904902	0.131035	Tifab
ENSMUSG00000056144.7	262.642	0.488871	0.187192	2.61161	0.00901175	0.131035	Trim34a
ENSMUSG00000064368.1	624.852	0.309635	0.118694	2.60869	0.00908893	0.131305	mt-Nd6
ENSMUSG00000019579.7	2217.93	-0.192513	0.0738608	-2.60643	0.00914906	0.13197	D17Wsu104e
ENSMUSG00000067851.5	2964.04	0.202596	0.0777803	2.60471	0.00919509	0.132429	Arfgef1
ENSMUSG00000015889.7	9512.06	0.150854	0.0579427	2.60351	0.00922751	0.132692	Lta4h
ENSMUSG00000017176.10	357.893	-0.380093	0.146145	-2.60079	0.0093009	0.133542	Nt5c3l
ENSMUSG00000029510.9	257.025	0.445987	0.171577	2.59933	0.00934053	0.133905	Gpc2
ENSMUSG00000009585.9	5680.87	-0.158968	0.0612474	-2.59551	0.00944507	0.134656	Apobec3
ENSMUSG00000034973.9	694.713	0.286203	0.110256	2.59581	0.00943695	0.134656	Dopey1
ENSMUSG00000025580.9	3907.77	-0.18366	0.0707238	-2.59686	0.00940795	0.134656	Eif4a3
ENSMUSG00000024750.4	3476.62	0.17106	0.0659113	2.59531	0.00945052	0.134656	Zfand5
ENSMUSG00000026721.8	2326.41	0.209029	0.0805925	2.59365	0.00949636	0.135103	Rabgap1l
ENSMUSG00000028756.6	3028.33	-0.176695	0.0681405	-2.59311	0.00951135	0.13511	Pink1
ENSMUSG00000040760.4	1616.76	0.257855	0.0994608	2.59253	0.00952729	0.135131	Appl1
ENSMUSG00000061518.4	1549.27	-0.211947	0.0818388	-2.58981	0.00960279	0.135585	Cox5b
ENSMUSG00000059796.9	6589.57	0.165785	0.0640138	2.58982	0.00960251	0.135585	Eif4a1
ENSMUSG00000002204.8	4995.56	-0.165039	0.063724	-2.58991	0.00960012	0.135585	Napsa
ENSMUSG00000039001.6	5837.61	-0.154596	0.0597242	-2.5885	0.00963956	0.135899	Rps21
ENSMUSG00000063952.9	990.806	0.266563	0.10312	2.58498	0.00973842	0.136061	Brpf3
ENSMUSG00000042444.9	1140.18	0.265286	0.102595	2.58576	0.00971637	0.136061	Fam63b
ENSMUSG00000042323.9	3694.39	0.212484	0.0821651	2.58607	0.00970782	0.136061	Pbrm1
ENSMUSG00000049313.8	4065.45	0.169187	0.0654217	2.5861	0.0097069	0.136061	Sorl1
ENSMUSG00000026104.7	3091.25	0.180474	0.0697684	2.58676	0.00968841	0.136061	Stat1
ENSMUSG00000024066.7	685.618	0.286452	0.110803	2.58524	0.00973116	0.136061	Xdh
ENSMUSG00000040592.5	365.264	-0.373115	0.144883	-2.57529	0.0100156	0.13869	Cd79b
ENSMUSG00000029238.7	401.206	0.397654	0.154295	2.57723	0.0099596	0.13869	Clock
ENSMUSG00000066892.7	449.466	0.366587	0.14225	2.57706	0.00996452	0.13869	Fbxl12
ENSMUSG00000034248.6	2736.25	0.19102	0.0741402	2.57646	0.00998171	0.13869	Slc25a37
ENSMUSG00000007613.9	1345.31	0.22387	0.0869061	2.576	0.0099952	0.13869	Tgfbr1
ENSMUSG00000015120.9	2750.73	0.200771	0.0779509	2.57561	0.0100064	0.13869	Ube2i
ENSMUSG00000025408.9	219.836	0.501404	0.194752	2.57458	0.0100362	0.138769	Ddit3
ENSMUSG00000039395.7	344.374	0.382735	0.148716	2.57359	0.010065	0.138962	Mreg
ENSMUSG00000049103.6	2995.72	0.176096	0.0684868	2.57124	0.0101336	0.139704	Ccr2
ENSMUSG00000074088.4	2331.57	-0.188382	0.0734554	-2.56458	0.0103301	0.141993	Snrnp40
ENSMUSG00000027189.10	3085.98	0.17643	0.0687932	2.56464	0.0103283	0.141993	Trim44
ENSMUSG00000020580.8	1913.2	0.249832	0.0974446	2.56384	0.0103522	0.142088	Rock2
ENSMUSG00000033306.8	361.164	0.382753	0.149336	2.56303	0.0103763	0.142209	Lpp
ENSMUSG00000049470.6	2279.25	0.197453	0.0770704	2.56198	0.0104077	0.142431	Aff4
ENSMUSG00000003072.9	3909.23	-0.161218	0.0630448	-2.55719	0.010552	0.143813	Atp5d
ENSMUSG00000015291.4	3358.69	0.192582	0.0753425	2.55609	0.0105856	0.143813	Gdi1
ENSMUSG00000045427.7	3046.29	0.194725	0.076147	2.55722	0.0105511	0.143813	Hnrnph2
ENSMUSG00000026779.6	361.351	0.420259	0.164407	2.55622	0.0105817	0.143813	Mastl
ENSMUSG00000026395.8	6105.79	0.18762	0.073388	2.55656	0.0105714	0.143813	Ptprc
ENSMUSG00000062014.6	2582.16	0.210773	0.0824909	2.55511	0.0106154	0.144009	Gmfb
ENSMUSG00000051506.10	11036.3	-0.143594	0.0562881	-2.55106	0.0107395	0.145481	Wdfy4
ENSMUSG00000085814.1	199.18	0.490267	0.192282	2.54972	0.0107809	0.14583	1810014B01Rik
ENSMUSG00000033952.8	1312.03	0.244841	0.0961058	2.54762	0.010846	0.145866	Aspm
ENSMUSG00000027751.8	2246.94	0.186095	0.0730157	2.54869	0.0108127	0.145866	Fam48a
ENSMUSG00000000708.8	1408.52	0.221204	0.0867934	2.54863	0.0108147	0.145866	Kat2b
ENSMUSG00000079509.3	1369.3	0.236335	0.0927495	2.5481	0.0108311	0.145866	Zfx
ENSMUSG00000091580.1	976.775	-0.258342	0.101526	-2.54459	0.0109407	0.14693	Gm6467
ENSMUSG00000021754.9	1892.36	0.197007	0.0774647	2.54318	0.0109849	0.14731	Map3k1
ENSMUSG00000040351.7	1262.32	0.222127	0.087428	2.54068	0.0110637	0.147312	Ankib1
ENSMUSG00000025199.9	2046.31	0.190528	0.0749659	2.54153	0.0110369	0.147312	Chuk
ENSMUSG00000025001.5	2161.83	0.22984	0.0904617	2.54075	0.0110616	0.147312	Hells
ENSMUSG00000020572.7	1251.67	0.260436	0.102486	2.54118	0.011048	0.147312	Nampt
ENSMUSG00000040225.7	8020.16	0.144911	0.0570183	2.54148	0.0110383	0.147312	Prrc2c
ENSMUSG00000013593.6	4010.12	-0.164442	0.0647783	-2.53854	0.0111317	0.147802	Ndufs2
ENSMUSG00000031767.7	498.389	-0.322492	0.127039	-2.53852	0.0111322	0.147802	Nudt7
ENSMUSG00000034807.8	7618.18	-0.14238	0.0561559	-2.53545	0.0112304	0.148794	Glt25d1
ENSMUSG00000045409.9	742.201	0.292027	0.115212	2.53469	0.0112547	0.148794	Trim39
ENSMUSG00000030967.6	1068.25	0.24651	0.0972513	2.53477	0.0112521	0.148794	Zranb1
ENSMUSG00000085438.1	4627.86	0.202359	0.0798848	2.53313	0.0113048	0.149246	1700020I14Rik
ENSMUSG00000048924.6	444.581	0.350718	0.138578	2.53084	0.0113791	0.149804	Ccdc125
ENSMUSG00000016534.9	6971.67	0.175908	0.0695028	2.53095	0.0113756	0.149804	Lamp2
ENSMUSG00000025437.8	884.524	0.254203	0.100515	2.52902	0.0114382	0.15037	Usp33
ENSMUSG00000001998.8	648.168	0.295939	0.117126	2.52667	0.0115151	0.150956	Ap4e1
ENSMUSG00000021738.4	1002.34	0.2409	0.0953314	2.52697	0.0115051	0.150956	Atxn7
ENSMUSG00000030846.9	2500.16	0.179989	0.0712842	2.52495	0.0115714	0.151482	Tial1
ENSMUSG00000040433.9	2265.03	0.199825	0.0791577	2.52439	0.0115898	0.15151	Zbtb38
ENSMUSG00000004319.9	945.301	0.252525	0.100095	2.52286	0.0116405	0.151961	Clcn3
ENSMUSG00000051329.7	1914.68	0.208299	0.0826132	2.52137	0.0116897	0.152178	Nup160
ENSMUSG00000056536.7	1001.68	0.25628	0.101643	2.52139	0.0116894	0.152178	Pign
ENSMUSG00000025132.7	19220.3	-0.135851	0.05391	-2.51997	0.0117366	0.15245	Arhgdia
ENSMUSG00000014245.6	428.99	0.348408	0.138297	2.51928	0.0117595	0.15245	Pigl
ENSMUSG00000027242.7	1434.34	0.211454	0.0839294	2.51942	0.0117547	0.15245	Wdr76
ENSMUSG00000073412.5	1510.87	-0.210239	0.0836067	-2.51462	0.0119161	0.154265	Lst1
ENSMUSG00000039637.8	8606.13	0.157211	0.0625335	2.51403	0.011936	0.154309	Coro7
ENSMUSG00000052889.5	1065.91	0.235931	0.0938737	2.51329	0.0119612	0.154422	Prkcb
ENSMUSG00000060019.4	5522.22	-0.15183	0.0605318	-2.50827	0.0121323	0.156199	Gm10073
ENSMUSG00000034206.7	726.502	0.274398	0.109392	2.5084	0.0121281	0.156199	Polq
ENSMUSG00000061613.6	655.998	0.288265	0.115039	2.5058	0.0122174	0.157079	U2af1
ENSMUSG00000033439.4	375.866	0.363358	0.145151	2.50332	0.0123034	0.157535	Ccdc76
ENSMUSG00000043411.8	3313.69	0.174416	0.0696655	2.50362	0.0122932	0.157535	Usp48
ENSMUSG00000045210.8	2362.63	0.200009	0.0798797	2.50388	0.012284	0.157535	Vcpip1
ENSMUSG00000055681.8	3698.64	-0.163437	0.0653147	-2.5023	0.0123391	0.157559	Cope
ENSMUSG00000030107.9	276.176	0.442319	0.176731	2.50277	0.0123225	0.157559	Usp18
ENSMUSG00000002083.6	874.659	-0.264334	0.105703	-2.50071	0.0123945	0.157928	Bbc3
ENSMUSG00000078622.2	1805.19	0.199278	0.0797222	2.49965	0.0124316	0.157928	Ccdc47
ENSMUSG00000059208.7	9486.37	0.14998	0.0600029	2.49954	0.0124355	0.157928	Hnrnpm
ENSMUSG00000042349.7	1363.12	0.256325	0.102528	2.50004	0.012418	0.157928	Ikbke
ENSMUSG00000034269.6	5191.63	0.151884	0.0607879	2.49859	0.0124689	0.158136	Setd5
ENSMUSG00000007041.9	9344	-0.146926	0.0588373	-2.49716	0.0125192	0.158345	Clic1
ENSMUSG00000028410.7	1404.22	0.212921	0.0852577	2.49738	0.0125115	0.158345	Dnaja1
ENSMUSG00000020108.3	339.011	-0.382016	0.153035	-2.49626	0.0125512	0.158535	Ddit4
ENSMUSG00000025495.8	530.726	0.317788	0.127438	2.49366	0.0126433	0.159268	Ptdss2
ENSMUSG00000001424.7	10891.2	-0.135358	0.0542796	-2.49371	0.0126414	0.159268	Snd1
ENSMUSG00000042500.10	696.778	0.280669	0.112635	2.49186	0.0127076	0.159863	Eif2c4
ENSMUSG00000031672.7	4060.41	-0.156785	0.0629535	-2.49049	0.0127567	0.160115	Got2
ENSMUSG00000038535.9	679.334	0.305108	0.122516	2.49034	0.0127619	0.160115	Zfp280d
ENSMUSG00000021171.7	1618.68	0.20239	0.0813099	2.48911	0.0128062	0.160446	Esyt2
ENSMUSG00000036879.8	2925.07	0.18456	0.0741604	2.48866	0.0128226	0.160446	Phkb
ENSMUSG00000020334.6	695.571	0.274173	0.1102	2.48796	0.0128477	0.160545	Slc22a4
ENSMUSG00000020869.7	8804.29	-0.136427	0.0548491	-2.48731	0.0128715	0.160627	Lrrc59
ENSMUSG00000022312.9	7804.39	-0.150414	0.0605501	-2.48413	0.0129868	0.161851	Eif3h
ENSMUSG00000068823.5	6640.99	0.146402	0.0589961	2.48156	0.013081	0.1624	Csde1
ENSMUSG00000031101.6	3474.4	-0.170723	0.0687983	-2.4815	0.0130831	0.1624	Sash3
ENSMUSG00000035851.8	2760.81	0.195544	0.0787709	2.48244	0.0130485	0.1624	Ythdc1
ENSMUSG00000006360.7	405.748	-0.345408	0.139222	-2.48099	0.0131019	0.162419	Crip1
ENSMUSG00000083716.2	4675.69	-0.154857	0.0624396	-2.48011	0.0131343	0.162604	Gm13436
ENSMUSG00000032409.7	1207.23	0.266143	0.107429	2.4774	0.0132345	0.163412	Atr
ENSMUSG00000029275.10	1029.57	0.247433	0.0998748	2.47743	0.0132332	0.163412	Gfi1
ENSMUSG00000018501.10	8534.92	0.146551	0.0591684	2.47684	0.0132552	0.163451	Ncor1
ENSMUSG00000004897.10	12483	-0.130944	0.0529578	-2.47261	0.013413	0.163884	Hdgf
ENSMUSG00000066232.3	4012.47	0.20594	0.0832518	2.4737	0.0133723	0.163884	Ipo7
ENSMUSG00000005410.4	13157.8	-0.130574	0.0527709	-2.47435	0.0133478	0.163884	Mcm5
ENSMUSG00000022450.5	1193.04	-0.22958	0.0927969	-2.47401	0.0133606	0.163884	Ndufa6
ENSMUSG00000053398.5	2508.46	-0.174016	0.0703724	-2.47279	0.0134064	0.163884	Phgdh
ENSMUSG00000038205.6	327.709	0.381051	0.154098	2.47279	0.0134064	0.163884	Prkab2
ENSMUSG00000035726.7	5357.07	0.165575	0.0669516	2.47305	0.0133964	0.163884	Supt16h
ENSMUSG00000023809.8	846.825	0.261853	0.105936	2.4718	0.0134435	0.164042	Rps6ka2
ENSMUSG00000030357.4	6211.01	-0.142865	0.0578509	-2.46954	0.0135286	0.164651	Fkbp4
ENSMUSG00000024174.8	322.028	0.385804	0.156198	2.46997	0.0135123	0.164651	Pot1b
ENSMUSG00000022385.9	1903.77	-0.187956	0.0761645	-2.46776	0.013596	0.165256	Gtse1
ENSMUSG00000040385.5	12839	-0.134198	0.0544153	-2.46618	0.0136564	0.165774	Ppp1ca
ENSMUSG00000021870.10	3782.03	0.185059	0.075062	2.46542	0.0136852	0.165909	Slmap
ENSMUSG00000041515.3	2971.99	-0.170655	0.0692679	-2.4637	0.0137511	0.166409	Irf8
ENSMUSG00000032741.8	3605.54	-0.161554	0.0655813	-2.46341	0.0137621	0.166409	Tpcn1
ENSMUSG00000030660.7	619.519	0.312341	0.12684	2.46248	0.0137979	0.166412	Pik3c2a
ENSMUSG00000016921.8	13748.4	0.129917	0.0527541	2.4627	0.0137895	0.166412	Srsf6
ENSMUSG00000030605.9	467.337	-0.322666	0.131128	-2.46069	0.0138669	0.167028	Mfge8
ENSMUSG00000032344.10	1882.03	0.189745	0.0772419	2.45651	0.0140295	0.167752	E330016A19Rik
ENSMUSG00000080935.1	1467.64	-0.206154	0.083867	-2.45811	0.013967	0.167752	Got2-ps1
ENSMUSG00000008730.10	4558.69	0.161839	0.0658851	2.45638	0.0140346	0.167752	Hipk1
ENSMUSG00000022489.4	2101.3	0.514618	0.209362	2.45803	0.0139703	0.167752	Pde1b
ENSMUSG00000048277.8	3179.09	-0.163806	0.0666744	-2.4568	0.0140181	0.167752	Syngr2
ENSMUSG00000042345.8	2006.58	-0.185155	0.0753441	-2.45746	0.0139922	0.167752	Ubash3a
ENSMUSG00000055782.7	676.653	0.318147	0.129617	2.45451	0.0141075	0.168149	Abcd2
ENSMUSG00000024384.3	1866.35	0.195496	0.0796593	2.45415	0.0141218	0.168149	Iws1
ENSMUSG00000024947.10	1893.27	-0.191885	0.0781752	-2.45455	0.014106	0.168149	Men1
ENSMUSG00000042508.8	1004.93	0.234169	0.0955072	2.45185	0.0142124	0.168369	Dmtf1
ENSMUSG00000083840.2	11836.7	-0.145664	0.0594033	-2.45212	0.0142019	0.168369	Gm15459
ENSMUSG00000046223.9	1796.38	0.213721	0.0871602	2.45205	0.0142046	0.168369	Plaur
ENSMUSG00000022364.7	2876.83	0.170154	0.0693779	2.45257	0.014184	0.168369	Wdr67
ENSMUSG00000052812.4	906.536	0.250747	0.102359	2.44967	0.0142986	0.169176	Atad2b
ENSMUSG00000032712.10	1196.94	0.249073	0.101736	2.44824	0.0143557	0.169209	2810474O19Rik
ENSMUSG00000040272.8	488.37	0.341995	0.139684	2.44834	0.0143517	0.169209	Accs
ENSMUSG00000042759.6	3846.17	0.163141	0.0666224	2.44875	0.0143353	0.169209	Apobr
ENSMUSG00000037416.4	1056.14	0.281097	0.114845	2.44763	0.01438	0.169215	Dmxl1
ENSMUSG00000023348.9	205.641	0.514831	0.210366	2.44732	0.0143924	0.169215	Trip6
ENSMUSG00000068739.7	4778.28	-0.151773	0.0620475	-2.44608	0.0144418	0.169582	Sars
ENSMUSG00000031948.7	5270.93	-0.147828	0.0604608	-2.44501	0.0144846	0.169872	Kars
ENSMUSG00000037860.8	1610.82	0.196685	0.0805355	2.44221	0.0145975	0.17086	Aim2
ENSMUSG00000024570.6	1649.54	-0.198133	0.0811351	-2.44202	0.0146054	0.17086	Rbfa
ENSMUSG00000003031.8	1334.71	0.21352	0.0874997	2.44024	0.0146774	0.170955	Cdkn1b
ENSMUSG00000014905.3	627.186	0.290124	0.118866	2.44077	0.0146558	0.170955	Dnajb9
ENSMUSG00000020380.9	1770.26	0.242279	0.0992733	2.44052	0.014666	0.170955	Rad50
ENSMUSG00000050565.8	896.197	0.243661	0.0998606	2.44001	0.0146867	0.170955	Tor1aip2
ENSMUSG00000024659.7	707.352	0.282492	0.115883	2.43774	0.0147794	0.171606	Anxa1
ENSMUSG00000027782.4	2766.8	0.181694	0.0745261	2.43799	0.0147691	0.171606	Kpna4
ENSMUSG00000002107.9	8890.65	0.145595	0.059833	2.43336	0.0149596	0.172112	Celf2
ENSMUSG00000057561.3	2305.95	0.19082	0.0783854	2.43438	0.0149174	0.172112	Eif1a
ENSMUSG00000045294.9	3503.33	0.160887	0.0661171	2.43337	0.0149592	0.172112	Insig1
ENSMUSG00000032254.8	1500.86	0.206301	0.0847491	2.43426	0.0149223	0.172112	Kif23
ENSMUSG00000039515.5	10908.7	-0.131958	0.0541738	-2.43583	0.0148579	0.172112	Ppp2r4
ENSMUSG00000063171.3	1902.45	-0.185431	0.0762119	-2.4331	0.0149703	0.172112	Rps4y2
ENSMUSG00000016018.3	2555.8	0.175507	0.0720826	2.4348	0.0149001	0.172112	Skiv2l2
ENSMUSG00000025505.9	218.944	0.458143	0.188183	2.43456	0.0149099	0.172112	Tmem80
ENSMUSG00000074698.4	2194.23	0.177774	0.0731101	2.4316	0.0150324	0.172614	Csnk2a1
ENSMUSG00000035248.7	2914.68	0.170469	0.0701545	2.42992	0.0151023	0.173204	Zcchc6
ENSMUSG00000022463.6	9140.82	-0.143198	0.0589534	-2.42901	0.0151401	0.173425	Srebf2
ENSMUSG00000005470.8	2261.29	-0.176138	0.0725748	-2.42698	0.0152251	0.174185	Asf1b
ENSMUSG00000022477.6	7415.01	-0.136295	0.0561899	-2.42561	0.0152825	0.174628	Aco2
ENSMUSG00000047675.9	7133.78	-0.153503	0.0633011	-2.42497	0.0153098	0.174726	Rps8
ENSMUSG00000024740.8	17092.5	-0.12473	0.0514473	-2.42442	0.0153327	0.174774	Ddb1
ENSMUSG00000030541.10	4344.02	-0.149821	0.0618271	-2.42323	0.0153832	0.174942	Idh2
ENSMUSG00000032307.10	638.379	0.279499	0.115343	2.42319	0.0153849	0.174942	Ube2q2
ENSMUSG00000047250.6	1074.7	0.254536	0.105062	2.42271	0.0154052	0.17496	Ptgs1
ENSMUSG00000036902.8	451.158	0.351929	0.145317	2.42179	0.0154441	0.175189	Neto2
ENSMUSG00000032727.6	549.253	0.292656	0.120969	2.41926	0.0155522	0.175933	Mier3
ENSMUSG00000020190.8	7190.99	-0.13781	0.0569585	-2.41948	0.0155428	0.175933	Mknk2
ENSMUSG00000005469.8	2152.3	-0.180748	0.0747356	-2.41849	0.015585	0.175933	Prkaca
ENSMUSG00000003644.11	13332	-0.127216	0.0525992	-2.4186	0.0155805	0.175933	Rps6ka1
ENSMUSG00000028334.4	3809.73	-0.157031	0.0650276	-2.41484	0.0157422	0.177493	Nans
ENSMUSG00000033285.8	2347.11	0.17308	0.0717421	2.41253	0.0158423	0.178193	Wdr3
ENSMUSG00000047141.4	522.208	0.338883	0.140467	2.41255	0.0158412	0.178193	Zfp654
ENSMUSG00000030279.8	2431.48	0.17632	0.07313	2.41105	0.0159067	0.178702	5730419I09Rik
ENSMUSG00000037270.10	2299.96	0.228452	0.0948175	2.40938	0.0159794	0.178874	4932438A13Rik
ENSMUSG00000027176.8	1212.2	0.214132	0.0888644	2.40965	0.015968	0.178874	Cstf3
ENSMUSG00000026436.9	1155.15	0.245917	0.102051	2.40974	0.0159638	0.178874	Elk4
ENSMUSG00000036751.6	3538.45	-0.156245	0.064873	-2.40847	0.0160194	0.178906	Cox6b1
ENSMUSG00000045128.8	9030.94	-0.134405	0.0558058	-2.40845	0.0160206	0.178906	Rpl18a
ENSMUSG00000021189.5	1415.39	0.212057	0.0881551	2.40549	0.0161506	0.180022	Atxn3
ENSMUSG00000024073.6	7467.17	0.13863	0.0576403	2.40509	0.0161685	0.180022	Birc6
ENSMUSG00000017830.8	695.044	0.272788	0.113457	2.40432	0.0162025	0.180022	Dhx58
ENSMUSG00000024661.6	15141.7	-0.131014	0.0544805	-2.40479	0.0161819	0.180022	Fth1
ENSMUSG00000084817.2	1882.7	-0.191958	0.0798495	-2.404	0.0162168	0.180022	Gm5526
ENSMUSG00000027708.7	1509.14	0.226698	0.094498	2.39897	0.0164413	0.182081	Dcun1d1
ENSMUSG00000027852.7	20308.4	0.137053	0.057127	2.39909	0.0164358	0.182081	Nras
ENSMUSG00000031168.8	1405.48	-0.203054	0.0846827	-2.39783	0.0164926	0.182434	Ebp
ENSMUSG00000014353.7	405.555	0.335011	0.139763	2.39699	0.0165305	0.182636	Tmem87b
ENSMUSG00000050229.2	1393.31	0.217272	0.0906647	2.39644	0.0165552	0.182694	Pigm
ENSMUSG00000059534.8	1620.24	-0.192058	0.0801815	-2.39529	0.016607	0.183049	Uqcr10
ENSMUSG00000040857.9	320.182	-0.379516	0.158554	-2.3936	0.0166839	0.183287	Erf
ENSMUSG00000028086.8	755.074	0.266122	0.111166	2.39392	0.0166693	0.183287	Fbxw7
ENSMUSG00000026458.6	585.104	-0.285856	0.119429	-2.39352	0.0166874	0.183287	Ppfia4
ENSMUSG00000040549.9	3253.69	0.185987	0.0777723	2.39143	0.0167828	0.184119	Ckap5
ENSMUSG00000031897.8	1795.12	-0.189158	0.0791355	-2.39031	0.0168344	0.184467	Psmb10
ENSMUSG00000089715.3	302.614	-0.375646	0.15727	-2.38855	0.0169151	0.184919	Cbx6
ENSMUSG00000032560.6	2938.05	0.178125	0.0745656	2.38884	0.0169017	0.184919	Dnajc13
ENSMUSG00000020063.9	888.578	0.246679	0.103316	2.38763	0.0169575	0.185166	Sirt1
ENSMUSG00000022559.7	1391.68	-0.201862	0.0845763	-2.38675	0.0169982	0.185394	Fbxl6
ENSMUSG00000039068.9	1861.69	0.187282	0.0786616	2.38086	0.0172724	0.188165	Zzz3
ENSMUSG00000016494.3	16566.1	-0.126699	0.0532525	-2.37922	0.0173494	0.188563	Cd34
ENSMUSG00000041801.5	398.999	-0.33511	0.140827	-2.37959	0.017332	0.188563	Phlda3
ENSMUSG00000074873.3	229.434	0.449742	0.189236	2.37661	0.0174724	0.18951	AI606181
ENSMUSG00000063696.5	8632.48	-0.135556	0.0570396	-2.37652	0.0174771	0.18951	Gm8730
ENSMUSG00000011257.10	4108.59	-0.149562	0.0629598	-2.37551	0.0175247	0.189588	Pabpc4
ENSMUSG00000024818.8	1345.14	-0.209471	0.0881652	-2.3759	0.0175064	0.189588	Slc25a45
ENSMUSG00000020160.10	1152.79	0.215125	0.0906431	2.37332	0.0176292	0.190298	Meis1
ENSMUSG00000025140.9	1286.66	-0.216461	0.0912249	-2.37282	0.0176527	0.190298	Pycr1
ENSMUSG00000036943.7	3015.48	0.184366	0.0776896	2.37311	0.0176389	0.190298	Rab8b
ENSMUSG00000032754.8	2062.87	0.199529	0.0841034	2.37242	0.0176719	0.190298	Slc24a6
ENSMUSG00000036372.8	1465.4	-0.198528	0.0839964	-2.36353	0.0181018	0.193726	1810006K21Rik
ENSMUSG00000084877.1	281.168	0.395656	0.167298	2.36499	0.0180307	0.193726	5430416N02Rik
ENSMUSG00000024885.7	2003.46	0.199057	0.084244	2.36287	0.0181342	0.193726	Aldh3b1
ENSMUSG00000022617.8	1279.21	0.249714	0.105658	2.36342	0.0181071	0.193726	Chkb
ENSMUSG00000027778.8	760.266	0.250744	0.106056	2.36427	0.0180657	0.193726	Ift80
ENSMUSG00000054364.4	1759.76	-0.188963	0.0799697	-2.36293	0.0181311	0.193726	Rhob
ENSMUSG00000056342.9	3761.62	0.192182	0.0813349	2.36284	0.0181353	0.193726	Usp34
ENSMUSG00000062729.5	813.699	0.250356	0.106126	2.35904	0.0183224	0.195502	Ppox
ENSMUSG00000071657.6	3304.33	-0.155375	0.0658896	-2.35812	0.0183678	0.19554	Bscl2
ENSMUSG00000003429.9	19079.2	-0.135818	0.0575945	-2.35817	0.0183652	0.19554	Rps11
ENSMUSG00000041538.8	1090.66	-0.217956	0.092449	-2.35758	0.0183944	0.1956	H2-Ob
ENSMUSG00000017677.5	4892.23	0.143903	0.0610944	2.35542	0.0185018	0.196519	Wsb1
ENSMUSG00000030802.8	2863.48	-0.162555	0.0690891	-2.35283	0.018631	0.19664	Bckdk
ENSMUSG00000029705.8	4557.24	-0.143763	0.061079	-2.35372	0.0185864	0.19664	Cux1
ENSMUSG00000033386.6	1457.68	0.199376	0.0847751	2.35183	0.0186815	0.19664	Frrs1
ENSMUSG00000027984.8	1021.5	-0.223255	0.0949223	-2.35198	0.0186739	0.19664	Hadh
ENSMUSG00000041229.8	2289.72	-0.179661	0.0763555	-2.35296	0.0186248	0.19664	Phf8
ENSMUSG00000025290.9	9570.89	-0.154496	0.0656493	-2.35335	0.0186049	0.19664	Rps24
ENSMUSG00000073468.5	541.79	0.296086	0.125776	2.35408	0.0185684	0.19664	Sft2d1
ENSMUSG00000049858.7	289.979	-0.382587	0.162667	-2.35196	0.0186746	0.19664	Suox
ENSMUSG00000028977.9	2746.54	0.181476	0.0772045	2.35059	0.0187435	0.197071	Casz1
ENSMUSG00000070544.5	3954.61	0.184852	0.0786921	2.34906	0.0188211	0.197664	Top1
ENSMUSG00000071477.4	927.923	-0.233309	0.099349	-2.34838	0.0188554	0.197802	Zfp777
ENSMUSG00000025375.9	1310.87	0.210687	0.0897699	2.34697	0.0189269	0.198329	Aatk
ENSMUSG00000031922.6	1068.12	0.223225	0.0951855	2.34516	0.0190188	0.198847	Cep57
ENSMUSG00000001173.9	1171.45	0.211131	0.0900179	2.34544	0.0190048	0.198847	Ocrl
ENSMUSG00000085823.1	775.499	-0.248142	0.105843	-2.34444	0.0190556	0.199008	Gm13012
ENSMUSG00000090739.1	204.79	0.455097	0.194233	2.34304	0.0191271	0.199533	D930016D06Rik
ENSMUSG00000009687.8	6521.18	-0.138082	0.0589504	-2.34235	0.0191628	0.199682	Fxyd5
ENSMUSG00000054814.8	900.997	0.232237	0.0992133	2.34078	0.0192434	0.200298	Usp46
ENSMUSG00000037572.9	2308.64	0.175472	0.0750214	2.33896	0.0193374	0.201053	Wdhd1
ENSMUSG00000048047.3	730.246	0.257926	0.110324	2.33789	0.0193931	0.201409	Zbtb33
ENSMUSG00000024640.3	15566.6	-0.120968	0.0517885	-2.33581	0.0195013	0.202307	Psat1
ENSMUSG00000020594.7	7447.5	0.153305	0.0656521	2.33511	0.0195377	0.20246	Pum2
ENSMUSG00000004929.6	1932.84	-0.179223	0.0768684	-2.33156	0.0197239	0.204053	Thop1
ENSMUSG00000035762.8	334.129	0.377796	0.162051	2.33135	0.0197351	0.204053	Tmem161b
ENSMUSG00000023175.8	7787.54	-0.135499	0.0581965	-2.32831	0.0198957	0.20531	Bsg
ENSMUSG00000024942.9	5423.97	-0.139066	0.0597313	-2.32819	0.0199022	0.20531	Capn1
ENSMUSG00000069682.3	15729.4	-0.139609	0.0599852	-2.32739	0.0199445	0.20531	Gm10275
ENSMUSG00000027957.7	1955.84	0.193435	0.083112	2.32741	0.0199436	0.20531	Slc35a3
ENSMUSG00000073647.3	414.391	0.323207	0.138958	2.32594	0.0200215	0.205493	Gm10557
ENSMUSG00000035161.6	1078.23	0.240705	0.103493	2.32582	0.0200283	0.205493	Ints6
ENSMUSG00000020570.8	7281.09	0.137567	0.0591316	2.32646	0.019994	0.205493	Sypl
ENSMUSG00000029635.9	821.624	0.244008	0.104978	2.32438	0.0201053	0.205784	Cdk8
ENSMUSG00000020280.6	1075.73	0.233556	0.100495	2.32405	0.0201227	0.205784	Pus10
ENSMUSG00000031166.6	1332.55	0.215955	0.092912	2.3243	0.0201094	0.205784	Wdr13
ENSMUSG00000045594.8	1610.93	-0.191118	0.0822696	-2.32307	0.0201755	0.206098	Glb1
ENSMUSG00000056666.6	2481.11	-0.180633	0.0777724	-2.32258	0.0202015	0.206139	Retsat
ENSMUSG00000056665.1	540.815	-0.286878	0.123561	-2.32176	0.020246	0.206368	4930572J05Rik
ENSMUSG00000025278.8	18679.2	-0.13614	0.0586496	-2.32124	0.020274	0.206416	Flnb
ENSMUSG00000029407.6	2465.52	0.167021	0.0719655	2.32085	0.0202948	0.206416	Uso1
ENSMUSG00000062203.7	6385.52	0.156075	0.0672645	2.32031	0.0203241	0.206488	Gspt1
ENSMUSG00000025745.5	4505.98	-0.144269	0.0622423	-2.31785	0.0204573	0.207616	Hadha
ENSMUSG00000032212.8	2701.66	0.18577	0.08018	2.31691	0.0205084	0.207889	Sltm
ENSMUSG00000026116.5	2900.82	0.157349	0.0679242	2.31654	0.0205286	0.207889	Tmem131
ENSMUSG00000027104.11	1339.2	0.207418	0.0895984	2.31498	0.0206141	0.208528	Atf2
ENSMUSG00000036678.7	2160.66	-0.180721	0.078104	-2.31385	0.020676	0.208802	Aaas
ENSMUSG00000037458.8	4822.47	0.147636	0.0638103	2.31367	0.0206858	0.208802	Azin1
ENSMUSG00000029545.7	2583.13	-0.161776	0.0699674	-2.31216	0.0207691	0.209416	Acads
ENSMUSG00000056737.8	7592.74	-0.129865	0.056187	-2.31129	0.0208167	0.20967	Capg
ENSMUSG00000081344.3	10964.6	-0.136455	0.0591107	-2.30847	0.0209729	0.210777	Gm14303
ENSMUSG00000052160.6	1749.07	-0.185435	0.0803485	-2.30788	0.0210057	0.210777	Pld4
ENSMUSG00000021733.8	1740.98	0.186697	0.0808621	2.30884	0.0209527	0.210777	Slc4a7
ENSMUSG00000022749.6	967.034	0.224256	0.0971779	2.30768	0.0210169	0.210777	Tbc1d23
ENSMUSG00000047881.8	576.402	0.276783	0.119982	2.30687	0.0210623	0.211007	Rell1
ENSMUSG00000000743.8	3139.93	-0.153337	0.0665222	-2.30505	0.0211636	0.211568	Chmp1a
ENSMUSG00000033685.5	23450.1	-0.134479	0.0583369	-2.30521	0.0211549	0.211568	Ucp2
ENSMUSG00000022914.9	977.22	0.233313	0.101361	2.30181	0.0213459	0.213163	Brwd1
ENSMUSG00000030365.5	846.397	0.237794	0.103334	2.30121	0.0213799	0.213274	Clec2i
ENSMUSG00000058355.6	4810.46	0.181272	0.0788392	2.29926	0.0214902	0.214146	Abce1
ENSMUSG00000037706.10	5184.27	-0.146376	0.063689	-2.2983	0.021545	0.214463	Cd81
ENSMUSG00000032998.9	953.516	0.224441	0.0977165	2.29686	0.0216268	0.21482	Foxj3
ENSMUSG00000021967.3	1292.38	-0.208471	0.090753	-2.29713	0.0216115	0.21482	Mrp63
ENSMUSG00000047459.8	2007.61	-0.173282	0.0754776	-2.2958	0.0216872	0.21483	Dynlrb1
ENSMUSG00000028088.8	298.897	0.363798	0.158474	2.29564	0.0216967	0.21483	Fmo5
ENSMUSG00000084416.2	13547.4	-0.132917	0.0578874	-2.29613	0.0216686	0.21483	Rpl10a-ps1
ENSMUSG00000023473.6	425.707	0.339385	0.147885	2.29492	0.0217378	0.215008	Celsr3
ENSMUSG00000056268.8	980.841	0.232928	0.101524	2.29433	0.0217718	0.215117	Dennd1b
ENSMUSG00000001729.7	10300.8	-0.123713	0.0539613	-2.29262	0.0218699	0.215859	Akt1
ENSMUSG00000031010.10	2912.93	0.204356	0.0891626	2.29195	0.0219088	0.216014	Usp9x
ENSMUSG00000006599.6	1779.47	0.183656	0.0801555	2.29124	0.0219493	0.216017	Gtf2h1
ENSMUSG00000028309.7	2403.5	0.166456	0.0726518	2.29114	0.0219553	0.216017	Rnf20
ENSMUSG00000000290.7	12886.1	0.129262	0.0565404	2.28619	0.0222431	0.218389	Itgb2
ENSMUSG00000026335.9	968.128	0.22168	0.0969523	2.28649	0.0222256	0.218389	Pam
ENSMUSG00000019428.10	7699.09	-0.127342	0.0557565	-2.28389	0.0223779	0.219382	Fkbp8
ENSMUSG00000022514.8	610.989	0.275757	0.120752	2.28367	0.0223911	0.219382	Il1rap
ENSMUSG00000079553.3	2327.95	-0.167748	0.0734912	-2.28256	0.0224561	0.219788	Kifc1
ENSMUSG00000024248.7	3828.93	-0.147838	0.0648169	-2.28085	0.0225572	0.220524	Cox7a2l
ENSMUSG00000009772.9	803.542	-0.248537	0.109036	-2.2794	0.0226434	0.220524	Nuak2
ENSMUSG00000028382.8	13319.3	0.157491	0.0690961	2.2793	0.0226493	0.220524	Rod1
ENSMUSG00000056310.8	1424.19	-0.190892	0.0837158	-2.28023	0.0225939	0.220524	Tyw1
ENSMUSG00000035671.4	1953.28	-0.200141	0.0877986	-2.27955	0.0226346	0.220524	Zswim4
ENSMUSG00000039735.8	577.793	0.299057	0.131416	2.27565	0.0228671	0.221721	Fnbp1l
ENSMUSG00000045636.9	2115.19	0.177996	0.0782105	2.27586	0.0228546	0.221721	Mtus1
ENSMUSG00000022899.2	262.143	0.39093	0.171711	2.27668	0.0228055	0.221721	Slc15a2
ENSMUSG00000023004.8	13877.2	-0.123693	0.054352	-2.27578	0.0228592	0.221721	Tuba1b
ENSMUSG00000072940.3	3259.79	-0.188178	0.0827494	-2.27407	0.0229618	0.222408	Gm10443
ENSMUSG00000029648.7	465.024	0.306982	0.135018	2.27364	0.0229874	0.222426	Flt1
ENSMUSG00000067071.2	3128.87	-0.150893	0.0664183	-2.27186	0.0230948	0.222927	Hes6
ENSMUSG00000069392.4	1206.17	-0.210971	0.0928638	-2.27184	0.0230964	0.222927	Rpl17-ps3
ENSMUSG00000026222.9	5625.68	0.138808	0.0611059	2.2716	0.0231108	0.222927	Sp100
ENSMUSG00000028693.8	3684.27	0.14705	0.0647667	2.27046	0.0231795	0.22336	Nasp
ENSMUSG00000008398.7	7972.4	-0.125808	0.0554586	-2.26851	0.0232982	0.223576	Elk3
ENSMUSG00000051235.7	641.748	0.271575	0.119661	2.26952	0.0232365	0.223576	Gen1
ENSMUSG00000030201.8	2135.25	0.176008	0.0776127	2.26777	0.0233429	0.223576	Lrp6
ENSMUSG00000032462.8	1824.78	0.17521	0.0772842	2.26708	0.0233852	0.223576	Pik3cb
ENSMUSG00000043991.3	1323.62	0.210531	0.0928427	2.26761	0.0233529	0.223576	Pura
ENSMUSG00000031309.8	1480.08	0.218259	0.0962787	2.26695	0.0233933	0.223576	Rps6ka3
ENSMUSG00000005674.3	1406.76	-0.196505	0.0866081	-2.2689	0.0232744	0.223576	Tomm40l
ENSMUSG00000029684.8	503.353	0.293057	0.129177	2.26866	0.0232892	0.223576	Wasl
ENSMUSG00000003873.9	4346.94	-0.140914	0.0621837	-2.26609	0.0234457	0.223653	Bax
ENSMUSG00000025260.4	1147.41	-0.205548	0.0907602	-2.26474	0.0235289	0.223653	Hsd17b10
ENSMUSG00000071652.5	1890.24	-0.174168	0.0768784	-2.2655	0.0234817	0.223653	Ints5
ENSMUSG00000057554.6	610.903	0.26914	0.118873	2.26408	0.0235689	0.223653	Lgals8
ENSMUSG00000036109.9	1077.14	0.226801	0.100158	2.26444	0.0235473	0.223653	Mbnl3
ENSMUSG00000048874.8	2322.79	0.184293	0.0813786	2.26464	0.0235348	0.223653	Phf3
ENSMUSG00000036918.8	7448.44	-0.130858	0.0577905	-2.26436	0.0235519	0.223653	Ttc7
ENSMUSG00000032216.7	3531.78	0.158172	0.0698963	2.26296	0.0236383	0.224084	Nedd4
ENSMUSG00000023953.7	874.001	0.226665	0.100271	2.26052	0.0237892	0.225286	Polh
ENSMUSG00000036777.7	2026.66	0.185872	0.0822462	2.25995	0.0238243	0.22539	Anln
ENSMUSG00000020954.8	1509.51	0.197667	0.0875343	2.25817	0.0239354	0.226212	Strn3
ENSMUSG00000028779.10	1463.4	-0.187571	0.0832251	-2.25378	0.0242103	0.228579	Pef1
ENSMUSG00000030340.8	437.903	0.308698	0.137064	2.25222	0.0243082	0.229272	Scnn1a
ENSMUSG00000039630.8	22807.9	0.149028	0.0661877	2.2516	0.0243474	0.22941	Hnrnpu
ENSMUSG00000000787.6	11503.4	0.140213	0.0622877	2.25105	0.0243826	0.229511	Ddx3x
ENSMUSG00000020021.4	357.461	0.331912	0.147482	2.25053	0.0244152	0.229587	Fgd6
ENSMUSG00000014959.6	3766.04	-0.143897	0.0640344	-2.24718	0.0246284	0.231359	Gorasp2
ENSMUSG00000054604.7	5113.84	0.138769	0.0617813	2.24613	0.0246956	0.231497	Cggbp1
ENSMUSG00000050299.7	11896.1	-0.127353	0.0567073	-2.24579	0.0247174	0.231497	Gm9843
ENSMUSG00000018160.9	2719.15	0.158741	0.0706731	2.24613	0.0246955	0.231497	Med1
ENSMUSG00000038612.9	8448.33	0.124896	0.0556255	2.2453	0.0247487	0.231558	Mcl1
ENSMUSG00000055065.6	9713.5	0.127317	0.0567312	2.24421	0.0248191	0.231844	Ddx17
ENSMUSG00000021706.8	326.966	0.359014	0.159985	2.24405	0.0248289	0.231844	Zfyve16
ENSMUSG00000020638.7	483.786	0.294633	0.131349	2.24314	0.024888	0.232164	Cmpk2
ENSMUSG00000036046.7	2286.07	-0.16746	0.0746906	-2.24205	0.0249579	0.232567	5031439G07Rik
ENSMUSG00000050697.8	1805.04	0.185579	0.0827852	2.2417	0.024981	0.232567	Prkaa1
ENSMUSG00000022369.7	1042.57	0.212377	0.0947873	2.24056	0.0250544	0.233019	Mtbp
ENSMUSG00000013160.7	5785.02	-0.134213	0.0599452	-2.23892	0.025161	0.233313	Atp6v0d1
ENSMUSG00000018076.8	4012.77	0.149002	0.066547	2.23905	0.0251526	0.233313	Med13l
ENSMUSG00000042446.9	1447.18	0.201356	0.0899195	2.23929	0.0251371	0.233313	Zmym4
ENSMUSG00000052192.4	1459.86	-0.191427	0.0855168	-2.23847	0.0251902	0.233353	Gm5963
ENSMUSG00000091679.1	247.241	0.396994	0.177419	2.23761	0.0252465	0.233643	Vmn2r96
ENSMUSG00000038866.9	1572.54	0.184935	0.0827348	2.23528	0.025399	0.234821	Zcchc2
ENSMUSG00000004661.8	201.135	0.433364	0.193964	2.23424	0.025467	0.235218	Arid3b
ENSMUSG00000000600.8	692.948	0.259834	0.116317	2.23383	0.025494	0.235234	Krit1
ENSMUSG00000032959.6	2546.42	-0.156468	0.070091	-2.23236	0.0255914	0.2359	Pebp1
ENSMUSG00000020982.7	1044.88	0.215194	0.0964262	2.23169	0.0256353	0.235964	Nemf
ENSMUSG00000005566.7	14317.7	-0.128855	0.0577438	-2.23149	0.0256488	0.235964	Trim28
ENSMUSG00000027427.7	766.121	0.237802	0.10672	2.22829	0.0258611	0.237485	Polr3f
ENSMUSG00000033382.7	1954.78	0.181689	0.0815397	2.22823	0.0258649	0.237485	Trappc8
ENSMUSG00000042029.6	2043.21	0.184404	0.0827733	2.22782	0.0258927	0.237506	Ncapg2
ENSMUSG00000018340.7	2713.59	-0.153788	0.0690781	-2.22629	0.0259948	0.23773	Anxa6
ENSMUSG00000039396.4	858.56	0.227682	0.102241	2.22691	0.025953	0.23773	Neil3
ENSMUSG00000057841.3	7567.65	-0.135223	0.0607594	-2.22555	0.0260442	0.23773	Rpl32
ENSMUSG00000047965.9	991.008	-0.220917	0.0992543	-2.22577	0.0260294	0.23773	Rpl9-ps7
ENSMUSG00000037475.9	1762.43	0.222805	0.100106	2.22569	0.0260347	0.23773	Thoc2
ENSMUSG00000034832.8	4228.9	0.162599	0.0731072	2.22412	0.0261402	0.238373	Tet3
ENSMUSG00000061111.8	2111.33	-0.166814	0.0750835	-2.22171	0.0263029	0.239176	Fam195b
ENSMUSG00000063065.7	3945.28	-0.139891	0.0629877	-2.22092	0.0263561	0.239176	Mapk3
ENSMUSG00000038126.9	1186.79	0.205766	0.0926401	2.22113	0.0263421	0.239176	Mphosph9
ENSMUSG00000027227.7	1663.81	-0.191551	0.0862315	-2.22136	0.0263267	0.239176	Sord
ENSMUSG00000040123.9	480.375	0.286862	0.129101	2.222	0.0262832	0.239176	Zmym5
ENSMUSG00000030180.9	3170.61	0.169327	0.0762606	2.22038	0.026393	0.239278	Kdm5a
ENSMUSG00000016256.9	8929.58	-0.121864	0.0549419	-2.21805	0.0265512	0.239782	Ctsz
ENSMUSG00000052336.5	1195.08	-0.207213	0.0934058	-2.21842	0.0265265	0.239782	Cx3cr1
ENSMUSG00000075706.3	1096.98	-0.20677	0.0932211	-2.21806	0.026551	0.239782	Gpx4
ENSMUSG00000022710.10	5802.07	0.135233	0.0609571	2.2185	0.0265208	0.239782	Usp7
ENSMUSG00000030707.9	29446.5	-0.110984	0.0500582	-2.2171	0.0266163	0.240137	Coro1a
ENSMUSG00000045382.6	1336.26	-0.193184	0.0872293	-2.21467	0.026783	0.241408	Cxcr4
ENSMUSG00000038342.8	2177.81	0.188274	0.085034	2.2141	0.0268217	0.241525	Mlxip
ENSMUSG00000041203.8	3051.69	-0.150703	0.0681541	-2.21121	0.0270216	0.24275	2310036O22Rik
ENSMUSG00000034560.5	1030.43	0.24405	0.110359	2.21142	0.0270068	0.24275	A230046K03Rik
ENSMUSG00000020125.6	22076.8	0.117796	0.0532774	2.211	0.0270357	0.24275	Elane
ENSMUSG00000038608.8	5055.85	0.152779	0.0691235	2.21023	0.0270895	0.243	Dock10
ENSMUSG00000055024.5	5325.76	0.131019	0.0593031	2.2093	0.0271535	0.24334	Ep300
ENSMUSG00000024045.5	3833.65	0.151121	0.0684258	2.20854	0.0272069	0.243352	Akap8
ENSMUSG00000003037.9	3468.78	-0.145168	0.06572	-2.20888	0.0271828	0.243352	Rab8a
ENSMUSG00000057789.6	5056.65	-0.133165	0.0603068	-2.20812	0.0272358	0.243377	Bak1
ENSMUSG00000025393.5	32597.3	-0.10857	0.0492087	-2.20633	0.0273612	0.243661	Atp5b
ENSMUSG00000021893.7	1141.21	0.206276	0.0934657	2.20697	0.0273159	0.243661	Capn7
ENSMUSG00000018372.7	466.336	0.307577	0.13944	2.2058	0.0273979	0.243661	Ccdc45
ENSMUSG00000040950.6	749.524	0.258815	0.117325	2.20597	0.0273863	0.243661	Mgl2
ENSMUSG00000024042.6	872.821	0.227465	0.103108	2.20608	0.0273783	0.243661	Sik1
ENSMUSG00000039005.7	202.701	0.466777	0.211699	2.20491	0.0274604	0.243985	Tlr4
ENSMUSG00000022982.9	1948.72	-0.168924	0.076647	-2.20392	0.0275298	0.24437	Sod1
ENSMUSG00000029634.8	1315.69	0.200785	0.0911249	2.20341	0.0275662	0.24446	Rnf6
ENSMUSG00000002058.7	3373.47	-0.146764	0.0666289	-2.2027	0.0276156	0.244666	Unc119
ENSMUSG00000006333.8	24676.1	-0.117001	0.0531426	-2.20165	0.0276901	0.245094	Rps9
ENSMUSG00000058794.6	5068.14	-0.131979	0.0599927	-2.19991	0.027813	0.245949	Nfe2
ENSMUSG00000044730.9	509.572	0.283642	0.128964	2.19939	0.0278501	0.246022	9930104L06Rik
ENSMUSG00000020307.8	3646.8	-0.140718	0.0640009	-2.19868	0.0279005	0.246022	Cdc34
ENSMUSG00000024581.6	976.994	0.211939	0.0964101	2.1983	0.0279277	0.246022	Napg
ENSMUSG00000021549.6	1039	0.251316	0.114341	2.19795	0.0279529	0.246022	Rasa1
ENSMUSG00000021431.7	524.625	0.279561	0.127168	2.19836	0.0279232	0.246022	Snrnp48
ENSMUSG00000038893.6	4619.54	-0.13899	0.0632761	-2.19657	0.0280511	0.246191	Fam117a
ENSMUSG00000062078.7	3444.49	0.174457	0.0794095	2.19693	0.0280252	0.246191	Qk
ENSMUSG00000026464.6	3592.03	0.14938	0.0679964	2.19688	0.0280288	0.246191	Zc3h11a
ENSMUSG00000018774.7	4446.87	-0.15344	0.0698887	-2.19549	0.0281283	0.246628	Cd68
ENSMUSG00000083669.3	923.224	-0.22531	0.10264	-2.19514	0.0281537	0.246628	Gm10169
ENSMUSG00000001473.6	2061.61	-0.166803	0.0760032	-2.19468	0.0281867	0.246687	Tubb6
ENSMUSG00000078312.4	246.284	-0.397695	0.181253	-2.19414	0.0282254	0.246794	Gm6344
ENSMUSG00000070425.5	1113.42	0.205864	0.0938629	2.19325	0.0282897	0.247125	Trpc2
ENSMUSG00000053173.8	3136.24	-0.150345	0.0685797	-2.19227	0.0283598	0.247456	Rpl18-ps2
ENSMUSG00000090112.2	836.066	0.256595	0.117061	2.19199	0.0283806	0.247456	Shprh
ENSMUSG00000025854.9	448.718	0.296683	0.135484	2.1898	0.0285387	0.247938	Fam20c
ENSMUSG00000020267.6	4057.39	-0.14888	0.0679893	-2.18976	0.0285419	0.247938	Hint1
ENSMUSG00000035004.2	2863.78	0.154068	0.070344	2.1902	0.0285094	0.247938	Igsf6
ENSMUSG00000024236.10	3304.37	0.15126	0.0690501	2.19058	0.0284822	0.247938	Svil
ENSMUSG00000036155.7	3271.88	-0.144465	0.0660496	-2.18722	0.0287264	0.249078	Mgat5
ENSMUSG00000038650.8	3369.46	0.143984	0.0658261	2.18734	0.0287181	0.249078	Rnh1
ENSMUSG00000019960.6	3287.49	-0.144281	0.0660075	-2.18583	0.0288282	0.249559	Dusp6
ENSMUSG00000021149.7	2977.05	0.156615	0.0716572	2.18561	0.028844	0.249559	Gtpbp4
ENSMUSG00000073968.3	241.443	0.401821	0.183869	2.18537	0.0288621	0.249559	Trim68
ENSMUSG00000033909.10	1316.71	0.223021	0.102139	2.18351	0.0289986	0.250509	Usp36
ENSMUSG00000030082.8	10999.2	-0.120157	0.0550493	-2.18272	0.0290562	0.250774	Sec61a1
ENSMUSG00000036707.9	6010.17	0.140889	0.0646058	2.18074	0.0292023	0.25093	Cab39
ENSMUSG00000019471.9	8039.62	-0.121036	0.0554902	-2.18121	0.029168	0.25093	Cdc37
ENSMUSG00000063229.7	18736.8	-0.111708	0.0512034	-2.18166	0.0291349	0.25093	Ldha
ENSMUSG00000027804.7	2662.11	0.156135	0.0716001	2.18066	0.0292086	0.25093	Ppid
ENSMUSG00000031370.5	1036.29	0.207583	0.0951877	2.18077	0.0292001	0.25093	Zrsr2
ENSMUSG00000033307.6	2480.34	-0.153644	0.0704985	-2.17939	0.0293027	0.251508	Mif
ENSMUSG00000040423.4	1707.18	0.172777	0.0792994	2.17879	0.0293471	0.251658	Rc3h1
ENSMUSG00000024614.6	2502.97	0.184108	0.0845195	2.17829	0.0293842	0.251745	Tmx3
ENSMUSG00000059326.6	5464	0.152164	0.0698696	2.17783	0.0294187	0.25181	Csf2ra
ENSMUSG00000020464.9	992.326	0.21973	0.100927	2.17712	0.0294715	0.252031	Pnpt1
ENSMUSG00000020009.6	4934.17	0.133464	0.0613448	2.17564	0.0295825	0.252749	Ifngr1
ENSMUSG00000029449.5	912.666	-0.224829	0.1034	-2.17436	0.0296783	0.253105	Rhof
ENSMUSG00000029614.9	5451.04	-0.143137	0.0658206	-2.17466	0.0296558	0.253105	Rpl6
ENSMUSG00000027379.7	1492.55	0.196283	0.0903403	2.1727	0.0298027	0.253472	Bub1
ENSMUSG00000027207.8	1002.88	-0.212073	0.0976006	-2.17286	0.0297905	0.253472	Galk2
ENSMUSG00000040850.10	1973.72	0.174093	0.0801179	2.17297	0.0297829	0.253472	Psme4
ENSMUSG00000061232.8	25484	-0.110091	0.0506968	-2.17155	0.0298896	0.25398	H2-K1
ENSMUSG00000009207.9	924.938	0.239592	0.110444	2.16935	0.0300563	0.255165	Lnp
ENSMUSG00000007827.8	326.696	0.34968	0.161262	2.1684	0.0301282	0.255377	Ankrd26
ENSMUSG00000020716.8	1054.05	0.207032	0.0955131	2.16758	0.0301906	0.255377	Nf1
ENSMUSG00000020680.8	3954.77	0.136454	0.0629478	2.16773	0.0301791	0.255377	Taf15
ENSMUSG00000056498.7	878.899	0.216845	0.100022	2.16798	0.0301601	0.255377	Tmem154
ENSMUSG00000068101.4	546.32	-0.264052	0.121976	-2.16479	0.0304037	0.255791	Cenpm
ENSMUSG00000034543.8	3164.78	0.148101	0.0684124	2.16483	0.0304006	0.255791	Morc2a
ENSMUSG00000007338.8	1229.57	-0.192319	0.0888118	-2.16546	0.0303522	0.255791	Mrpl49
ENSMUSG00000030835.5	9002.66	-0.125518	0.057954	-2.16582	0.0303251	0.255791	Nomo1
ENSMUSG00000020717.11	7850.68	-0.122598	0.0566318	-2.16482	0.0304011	0.255791	Pecam1
ENSMUSG00000027692.9	225.894	0.390234	0.18026	2.16484	0.0304001	0.255791	Tnik
ENSMUSG00000040407.9	1528.04	0.205585	0.0949981	2.1641	0.0304568	0.256007	Akap9
ENSMUSG00000024472.8	3219.84	0.150589	0.0696404	2.16238	0.0305887	0.256885	Dcp2
ENSMUSG00000030162.7	798.515	0.227374	0.105169	2.16199	0.0306188	0.256907	Olr1
ENSMUSG00000025428.9	24481.3	-0.108716	0.0503201	-2.1605	0.0307342	0.257598	Atp5a1
ENSMUSG00000033166.9	1573.55	0.195713	0.090599	2.16021	0.0307563	0.257598	Dis3
ENSMUSG00000027346.9	1271.82	0.200449	0.092807	2.15984	0.0307848	0.257606	Gpcpd1
ENSMUSG00000030942.7	2106.65	0.162604	0.0753104	2.15912	0.0308411	0.257846	Thumpd1
ENSMUSG00000035173.8	554.369	0.275734	0.127999	2.15419	0.0312252	0.258573	A630007B06Rik
ENSMUSG00000027951.10	2349.91	0.166272	0.0771143	2.15618	0.0310697	0.258573	Adar
ENSMUSG00000052298.6	2353.45	-0.154418	0.0716592	-2.15489	0.0311703	0.258573	Cdc42se2
ENSMUSG00000029062.8	2594.4	0.159758	0.0741448	2.15468	0.031187	0.258573	Cdk11b
ENSMUSG00000060992.7	5928.45	-0.125612	0.0582601	-2.15605	0.0310798	0.258573	Copz1
ENSMUSG00000045205.9	937.475	0.230709	0.107164	2.15285	0.0313304	0.258573	Dpy19l4
ENSMUSG00000032624.8	2283.07	0.158258	0.0735208	2.15257	0.0313527	0.258573	Eml4
ENSMUSG00000048920.6	1310.41	-0.191118	0.0886959	-2.15475	0.0311812	0.258573	Fkrp
ENSMUSG00000031447.6	18553.5	-0.11219	0.0521034	-2.15321	0.0313024	0.258573	Lamp1
ENSMUSG00000002768.7	1173.25	-0.197512	0.0917424	-2.1529	0.0313264	0.258573	Mea1
ENSMUSG00000079184.4	770.389	0.261415	0.121177	2.15731	0.0309817	0.258573	Mphosph8
ENSMUSG00000029632.5	2422.94	-0.167972	0.0779251	-2.15556	0.0311184	0.258573	Ndufa4
ENSMUSG00000066861.7	331.567	0.32849	0.152405	2.15537	0.0311329	0.258573	Oas1g
ENSMUSG00000039849.5	2162.48	-0.158303	0.0734556	-2.15509	0.0311551	0.258573	Pcif1
ENSMUSG00000022855.7	1850.97	0.170653	0.0793004	2.15199	0.0313984	0.258573	Senp2
ENSMUSG00000032501.8	259.332	0.39117	0.181702	2.15281	0.0313336	0.258573	Trib1
ENSMUSG00000025616.7	922.977	0.221869	0.1031	2.15199	0.0313982	0.258573	Usp16
ENSMUSG00000027953.5	797.152	-0.223522	0.103981	-2.14965	0.0315831	0.259858	Slc50a1
ENSMUSG00000043962.9	8297.88	0.122531	0.0570095	2.14931	0.03161	0.259858	Thrap3
ENSMUSG00000029836.9	400.546	0.310378	0.144445	2.14876	0.0316532	0.259984	Cbx3
ENSMUSG00000035047.2	2203.47	0.163024	0.0760462	2.14375	0.0320528	0.262574	Kri1
ENSMUSG00000033499.6	3586.23	0.147294	0.0686948	2.14418	0.0320182	0.262574	Larp4b
ENSMUSG00000044791.9	4056.07	0.172662	0.0805357	2.14391	0.0320397	0.262574	Setd2
ENSMUSG00000031787.7	1584.45	-0.17445	0.081498	-2.14055	0.0323104	0.264453	Katnb1
ENSMUSG00000040253.9	361.813	0.333914	0.156112	2.13894	0.0324404	0.264821	Gbp7
ENSMUSG00000070605.4	338.766	0.352738	0.16489	2.13923	0.0324172	0.264821	Gm13251
ENSMUSG00000074604.3	477.485	0.276729	0.129345	2.13946	0.0323984	0.264821	Mgst2
ENSMUSG00000037474.7	2129.96	0.15881	0.0742712	2.13824	0.0324971	0.265053	Dtl
ENSMUSG00000026781.9	536.521	0.263784	0.123663	2.13308	0.0329183	0.265056	Acbd5
ENSMUSG00000051439.6	776.189	0.232006	0.108769	2.13302	0.0329228	0.265056	Cd14
ENSMUSG00000029516.11	2417.24	0.153769	0.072086	2.13314	0.0329135	0.265056	Cit
ENSMUSG00000039168.9	4462.78	-0.130842	0.0612791	-2.13518	0.0327461	0.265056	Dap
ENSMUSG00000035105.5	2005.02	-0.163993	0.0767846	-2.13575	0.0326995	0.265056	Egln3
ENSMUSG00000021996.9	2700.48	0.147753	0.0692529	2.13353	0.0328815	0.265056	Esd
ENSMUSG00000015656.10	22634.8	-0.123282	0.0577396	-2.13513	0.0327504	0.265056	Hspa8
ENSMUSG00000018169.6	1349.16	-0.182264	0.0852855	-2.1371	0.0325898	0.265056	Mfng
ENSMUSG00000024038.9	1424.13	-0.183323	0.0858178	-2.13619	0.032664	0.265056	Ndufv3
ENSMUSG00000022141.6	3456.42	0.180442	0.0844858	2.13577	0.0326984	0.265056	Nipbl
ENSMUSG00000024851.7	1708.16	0.173515	0.081178	2.13746	0.0325607	0.265056	Pitpnm1
ENSMUSG00000027642.9	14071.1	-0.112316	0.0526268	-2.1342	0.032826	0.265056	Rpn2
ENSMUSG00000044712.8	267.67	0.365538	0.171106	2.13632	0.032653	0.265056	Slc38a6
ENSMUSG00000090935.2	781.985	0.232897	0.109153	2.13366	0.0328703	0.265056	Synj2bp
ENSMUSG00000025016.9	9426.06	0.132428	0.0620287	2.13494	0.0327658	0.265056	Tm9sf3
ENSMUSG00000029135.9	1333.88	0.193065	0.090544	2.13228	0.0329836	0.265316	Fosl2
ENSMUSG00000027523.12	17188.7	-0.10909	0.051212	-2.13015	0.033159	0.266269	Gnas
ENSMUSG00000054008.7	1556.81	-0.180432	0.0846931	-2.13042	0.0331367	0.266269	Ndst1
ENSMUSG00000024095.7	2165.67	0.156405	0.0734997	2.12797	0.0333396	0.267489	Hnrpll
ENSMUSG00000003402.7	5959.59	-0.125752	0.0591275	-2.1268	0.0334367	0.267599	Prkcsh
ENSMUSG00000031887.6	880.259	-0.214507	0.10086	-2.12677	0.0334391	0.267599	Tradd
ENSMUSG00000041258.8	1835.32	0.16601	0.0780544	2.12685	0.0334324	0.267599	Zfp236
ENSMUSG00000027435.8	8695.71	-0.117229	0.0551593	-2.12528	0.0335635	0.268364	Cd93
ENSMUSG00000028234.6	7549.75	-0.134793	0.0634763	-2.12352	0.0337103	0.269078	Rps20
ENSMUSG00000037089.8	2499.2	-0.152547	0.0718326	-2.12364	0.0336999	0.269078	Slc35b2
ENSMUSG00000032436.9	21851.3	-0.112792	0.0531295	-2.12297	0.033756	0.269141	Cmtm7
ENSMUSG00000057788.7	2190.12	-0.162045	0.0763379	-2.12274	0.0337758	0.269141	Ddx49
ENSMUSG00000028771.7	1729.39	0.174405	0.0822458	2.12054	0.0339606	0.270234	Ptpn12
ENSMUSG00000033364.6	1276.28	0.19145	0.0902889	2.12042	0.0339708	0.270234	Usp37
ENSMUSG00000028692.8	6386.04	-0.123354	0.0582454	-2.11783	0.0341891	0.270733	Akr1a4
ENSMUSG00000035960.6	3415.88	-0.139771	0.0660435	-2.11635	0.034315	0.270733	Apex1
ENSMUSG00000028757.4	11455.1	-0.116278	0.0549603	-2.11567	0.0343732	0.270733	Ddost
ENSMUSG00000080848.2	6226.82	-0.144775	0.0683924	-2.11682	0.0342749	0.270733	Gm9385
ENSMUSG00000026816.7	1434.13	-0.180205	0.0851238	-2.11697	0.034262	0.270733	Gtf3c5
ENSMUSG00000027087.5	1426.8	0.178606	0.0844311	2.1154	0.0343956	0.270733	Itgav
ENSMUSG00000021423.5	2441.03	-0.177635	0.0838692	-2.118	0.0341748	0.270733	Ly86
ENSMUSG00000039480.7	1022.54	0.219857	0.10392	2.11564	0.0343758	0.270733	Nt5dc1
ENSMUSG00000018547.8	4649.14	-0.132102	0.062435	-2.11584	0.0343587	0.270733	Pip4k2b
ENSMUSG00000070003.6	2533.39	-0.150338	0.0710739	-2.11523	0.03441	0.270733	Ssbp4
ENSMUSG00000024811.5	5502.18	0.129366	0.0611375	2.11598	0.0343463	0.270733	Tnks2
ENSMUSG00000021712.8	433.29	0.292588	0.138238	2.11655	0.0342979	0.270733	Trim23
ENSMUSG00000033972.8	216.021	0.396589	0.1874	2.11627	0.0343222	0.270733	Zfp944
ENSMUSG00000022174.8	2318.93	-0.161944	0.0766307	-2.1133	0.0345751	0.271424	Dad1
ENSMUSG00000039621.7	4279.52	-0.145764	0.0689893	-2.11284	0.0346141	0.271424	Prex1
ENSMUSG00000032217.6	1576.03	0.185295	0.0876883	2.11311	0.0345915	0.271424	Rnf111
ENSMUSG00000033228.6	5702.52	0.140446	0.0664699	2.11293	0.0346072	0.271424	Scaf11
ENSMUSG00000017188.3	1176.43	-0.190072	0.0900613	-2.11047	0.0348177	0.271873	Ccdc56
ENSMUSG00000056501.3	1754.68	-0.166634	0.0789346	-2.11104	0.0347693	0.271873	Cebpb
ENSMUSG00000026994.3	223.405	0.392774	0.186015	2.11152	0.0347276	0.271873	Galnt3
ENSMUSG00000030677.7	1672.97	-0.177986	0.0843594	-2.10986	0.0348707	0.271873	Kif22
ENSMUSG00000041921.10	475.137	0.285021	0.135093	2.10981	0.0348749	0.271873	Metap1d
ENSMUSG00000001151.8	4056.95	0.136899	0.0648663	2.11048	0.0348168	0.271873	Pcnt
ENSMUSG00000055839.4	1271.99	-0.185573	0.0879111	-2.11091	0.0347799	0.271873	Tceb2
ENSMUSG00000079523.2	942.48	-0.209084	0.0991391	-2.10899	0.0349451	0.272193	Tmsb10
ENSMUSG00000022708.10	206.382	0.400451	0.190097	2.10656	0.0351554	0.273603	Zbtb20
ENSMUSG00000071369.4	584.822	0.251045	0.119253	2.10515	0.0352786	0.274106	Map3k5
ENSMUSG00000002997.9	2139.73	0.165502	0.0786155	2.1052	0.0352736	0.274106	Prkar2b
ENSMUSG00000024431.7	1963.12	0.172115	0.0818186	2.10362	0.0354118	0.274912	Nr3c1
ENSMUSG00000025130.5	27742.5	-0.104737	0.0498403	-2.10145	0.0356016	0.275927	P4hb
ENSMUSG00000024241.6	986.352	0.202754	0.0964802	2.10151	0.0355961	0.275927	Sos1
ENSMUSG00000002015.5	3822.7	-0.141536	0.0674171	-2.09941	0.0357805	0.277084	Bcap31
ENSMUSG00000005871.7	1213.31	0.224861	0.107241	2.09679	0.0360123	0.27772	Apc
ENSMUSG00000016087.6	1857.83	0.176341	0.0840566	2.09789	0.035915	0.27772	Fli1
ENSMUSG00000022952.9	924.389	-0.211238	0.100784	-2.09596	0.0360859	0.27772	Runx1
ENSMUSG00000023393.9	443.631	0.288268	0.137524	2.09613	0.0360705	0.27772	Slc17a9
ENSMUSG00000031314.10	2419.73	0.164355	0.078361	2.09741	0.0359574	0.27772	Taf1
ENSMUSG00000046985.7	580.111	0.251968	0.120137	2.09733	0.0359647	0.27772	Tapt1
ENSMUSG00000020455.10	1431.39	0.175284	0.0836359	2.0958	0.0361004	0.27772	Trim11
ENSMUSG00000035798.7	457.791	0.279477	0.13333	2.09612	0.0360714	0.27772	Zdhhc17
ENSMUSG00000078521.2	413.51	-0.292364	0.139607	-2.0942	0.0362424	0.278331	2610002D18Rik
ENSMUSG00000039640.7	2381.66	-0.157867	0.075394	-2.0939	0.036269	0.278331	Mrpl12
ENSMUSG00000061898.4	292.795	0.341618	0.163117	2.09432	0.0362317	0.278331	Rbak
ENSMUSG00000082691.4	2740.27	-0.150997	0.0721263	-2.09352	0.0363031	0.278364	Dynlt1-ps1
ENSMUSG00000031059.9	2193.2	-0.164975	0.0788413	-2.09249	0.0363946	0.278836	Ndufb11
ENSMUSG00000003662.4	1210.57	-0.18578	0.0888252	-2.09153	0.0364809	0.279061	Ciao1
ENSMUSG00000027198.9	2964.07	-0.140626	0.0672368	-2.0915	0.0364837	0.279061	Ext2
ENSMUSG00000034792.8	991.756	-0.200384	0.0958923	-2.08968	0.0366469	0.280081	Gna15
ENSMUSG00000027313.3	244.563	-0.378345	0.181159	-2.08847	0.0367553	0.28045	Chac1
ENSMUSG00000046404.4	212.502	0.40807	0.19537	2.0887	0.0367347	0.28045	Yod1
ENSMUSG00000030745.7	901.645	-0.211659	0.101374	-2.0879	0.0368067	0.280613	Il21r
ENSMUSG00000000078.6	420.97	0.283873	0.136115	2.08554	0.0370203	0.281758	Klf6
ENSMUSG00000028496.10	397.967	0.293787	0.140956	2.08425	0.0371376	0.281758	Mllt3
ENSMUSG00000022680.6	2075.6	-0.154757	0.07425	-2.08427	0.037136	0.281758	Pdxdc1
ENSMUSG00000026878.9	4998.75	0.128417	0.0615967	2.08481	0.0370869	0.281758	Rab14
ENSMUSG00000028420.7	1268.79	0.18349	0.0879849	2.08548	0.0370261	0.281758	Tmem38b
ENSMUSG00000033233.10	451.682	-0.274331	0.131577	-2.08495	0.0370738	0.281758	Trim45
ENSMUSG00000041891.9	4297.22	0.135843	0.0651894	2.08382	0.0371763	0.281822	Lman1
ENSMUSG00000036106.9	268.009	-0.34974	0.167872	-2.08337	0.0372174	0.281905	Prr5
ENSMUSG00000019951.8	4900.22	0.13284	0.0637893	2.08248	0.0372983	0.282289	Uhrf1bp1l
ENSMUSG00000074743.3	555.814	-0.25073	0.120445	-2.0817	0.0373696	0.282583	Thbd
ENSMUSG00000040785.10	908.114	0.21304	0.102354	2.0814	0.0373976	0.282583	Ttc3
ENSMUSG00000075254.4	1176.14	-0.190823	0.0917737	-2.07927	0.0375921	0.283137	Heg1
ENSMUSG00000016487.9	765.037	0.222632	0.107066	2.07939	0.0375815	0.283137	Ppfibp1
ENSMUSG00000004896.10	550.004	0.272058	0.130833	2.07943	0.0375775	0.283137	Rrnad1
ENSMUSG00000009863.8	2059.11	-0.168892	0.0812048	-2.07983	0.0375412	0.283137	Sdhb
ENSMUSG00000029191.9	3098.16	0.159314	0.0766785	2.07769	0.0377379	0.284007	Rfc1
ENSMUSG00000083621.1	8522.06	-0.125351	0.0604087	-2.07506	0.0379813	0.285608	Gm14586
ENSMUSG00000042208.8	674.194	0.261795	0.126246	2.07369	0.0381079	0.285712	0610010F05Rik
ENSMUSG00000027201.10	905.637	0.206608	0.0995958	2.07446	0.0380363	0.285712	Myef2
ENSMUSG00000035139.8	1335.72	0.179741	0.0866948	2.07326	0.0381479	0.285712	Secisbp2
ENSMUSG00000020608.6	1772.69	0.201439	0.0971253	2.07401	0.0380781	0.285712	Smc6
ENSMUSG00000029729.6	561.503	0.249352	0.120263	2.07339	0.0381363	0.285712	Zkscan1
ENSMUSG00000022451.6	1483.3	0.174564	0.0842341	2.07237	0.0382309	0.286104	Twf1
ENSMUSG00000022102.7	1358.58	-0.184711	0.0891449	-2.07203	0.0382629	0.286115	Dok2
ENSMUSG00000020781.8	605.498	-0.240738	0.116226	-2.0713	0.0383306	0.286392	Tsen54
ENSMUSG00000023032.6	513.154	-0.259909	0.125514	-2.07075	0.0383822	0.286548	Slc4a8
ENSMUSG00000023110.5	3702.39	-0.136539	0.065989	-2.06912	0.0385345	0.287455	Prmt5
ENSMUSG00000029463.5	458.334	-0.276884	0.133866	-2.06837	0.0386055	0.287526	1500011H22Rik
ENSMUSG00000040481.9	4667.01	0.130166	0.0629229	2.06866	0.0385782	0.287526	Bptf
ENSMUSG00000052605.5	274.601	-0.340888	0.164862	-2.06771	0.0386671	0.287756	Isoc2b
ENSMUSG00000054237.5	354.571	0.304696	0.147413	2.06695	0.0387386	0.288059	5730455O13Rik
ENSMUSG00000023942.8	1902.42	-0.170345	0.0824879	-2.06509	0.0389141	0.288904	Slc29a1
ENSMUSG00000028465.10	58378.8	-0.114134	0.0552653	-2.0652	0.038904	0.288904	Tln1
ENSMUSG00000059555.6	3134.33	-0.137645	0.0667277	-2.0628	0.0391321	0.290055	A830007P12Rik
ENSMUSG00000029466.5	1583.22	-0.181696	0.0881026	-2.06233	0.0391767	0.290055	Anapc7
ENSMUSG00000027598.9	2519.23	0.146828	0.0711762	2.06288	0.0391238	0.290055	Itch
ENSMUSG00000002870.7	11066.3	-0.111964	0.0543015	-2.0619	0.0392176	0.290055	Mcm2
ENSMUSG00000036822.6	1643.9	0.186789	0.0905938	2.06183	0.0392243	0.290055	Topors
ENSMUSG00000029547.6	5512.71	-0.132705	0.0643899	-2.06095	0.0393075	0.290211	Ints1
ENSMUSG00000074994.4	1068.27	0.197523	0.0958257	2.06128	0.0392766	0.290211	Qser1
ENSMUSG00000031487.4	379.107	-0.299695	0.145453	-2.06042	0.0393579	0.290354	Brf2
ENSMUSG00000041199.2	426.739	-0.277637	0.134807	-2.05952	0.0394448	0.290766	Rpusd1
ENSMUSG00000078429.2	3578.65	-0.136206	0.0662093	-2.0572	0.0396668	0.291115	Ctdsp2
ENSMUSG00000059498.6	5274.74	-0.129171	0.0627725	-2.05777	0.0396125	0.291115	Fcgr3
ENSMUSG00000037012.11	7611.15	-0.121253	0.0589369	-2.05734	0.0396538	0.291115	Hk1
ENSMUSG00000027162.7	2536.53	0.186479	0.0906454	2.05724	0.0396635	0.291115	Lin7c
ENSMUSG00000024181.8	998.936	-0.198507	0.0964998	-2.05707	0.0396791	0.291115	Mrpl28
ENSMUSG00000040618.5	4336.5	-0.134524	0.065364	-2.05808	0.0395826	0.291115	Pck2
ENSMUSG00000052593.8	3997.26	0.134881	0.0655956	2.05625	0.0397585	0.29139	Adam17
ENSMUSG00000002379.6	989.196	-0.201142	0.09783	-2.05604	0.039779	0.29139	Ndufa11
ENSMUSG00000029253.8	883.593	0.21576	0.104957	2.0557	0.0398117	0.291402	Cenpc1
ENSMUSG00000006728.6	7966.68	-0.118001	0.0574125	-2.05532	0.0398484	0.291442	Cdk4
ENSMUSG00000024083.8	973.42	0.201294	0.097985	2.05433	0.0399438	0.291911	Pja2
ENSMUSG00000033411.9	1189.77	0.188906	0.0919745	2.0539	0.0399855	0.291988	Ctdspl2
ENSMUSG00000019082.9	844.332	0.233557	0.113811	2.05215	0.0401552	0.292998	Slc25a22
ENSMUSG00000022070.6	2017.37	0.153692	0.0749604	2.0503	0.0403347	0.293621	6720463M24Rik
ENSMUSG00000061848.4	1650.67	-0.181089	0.088316	-2.05046	0.0403192	0.293621	Gm5805
ENSMUSG00000034021.9	2120.9	0.170279	0.0830466	2.0504	0.0403255	0.293621	Pds5b
ENSMUSG00000015340.4	2004.22	0.167128	0.0815397	2.04965	0.0403989	0.293859	Cybb
ENSMUSG00000030704.8	2432.83	0.156893	0.076634	2.0473	0.0406286	0.2953	Rab6
ENSMUSG00000027184.8	18118.4	0.119559	0.0584478	2.04557	0.0407982	0.296302	Caprin1
ENSMUSG00000016503.9	1883.69	-0.160311	0.0784046	-2.04466	0.0408883	0.296726	Gtf3a
ENSMUSG00000032046.9	1224.9	-0.18302	0.089543	-2.04394	0.04096	0.297015	Abhd12
ENSMUSG00000024608.4	13264	-0.118738	0.0581048	-2.04352	0.0410009	0.297082	Rps14
ENSMUSG00000058835.7	3106.61	0.15427	0.0755293	2.04252	0.0410998	0.297481	Abi1
ENSMUSG00000073405.5	719.592	-0.226031	0.110691	-2.042	0.0411515	0.297481	C920025E04Rik
ENSMUSG00000042042.8	3093.86	0.16286	0.0797526	2.04206	0.0411452	0.297481	Csgalnact2
ENSMUSG00000040964.9	2174.54	-0.150313	0.0736599	-2.04063	0.0412873	0.298002	Arhgef10l
ENSMUSG00000050075.8	296.842	-0.337968	0.165595	-2.04093	0.0412573	0.298002	Gpr171
ENSMUSG00000045962.9	12110.8	0.111276	0.0545412	2.04022	0.041328	0.298065	Wnk1
ENSMUSG00000022016.9	1606.86	0.176456	0.086519	2.0395	0.0413998	0.298078	Akap11
ENSMUSG00000021357.7	2388.52	0.149532	0.0733236	2.03934	0.041416	0.298078	Exoc2
ENSMUSG00000067719.3	2057.34	-0.16048	0.0787083	-2.03893	0.0414573	0.298078	Gm10221
ENSMUSG00000027272.5	1330.74	0.176085	0.0863597	2.03898	0.0414523	0.298078	Ubr1
ENSMUSG00000063015.6	8100.3	-0.121139	0.0594618	-2.03726	0.0416238	0.298747	Ccni
ENSMUSG00000024194.8	1669.01	-0.163997	0.0805329	-2.0364	0.0417102	0.298747	Cuta
ENSMUSG00000032014.5	2288.35	-0.147234	0.0722931	-2.03662	0.041688	0.298747	Oaf
ENSMUSG00000021451.8	4436.61	-0.149039	0.0731753	-2.03673	0.0416769	0.298747	Sema4d
ENSMUSG00000007812.9	624.564	0.255208	0.125255	2.0375	0.0415999	0.298747	Zfp655
ENSMUSG00000035329.7	1124.41	0.189367	0.093027	2.03562	0.041789	0.298854	Fbxo33
ENSMUSG00000033808.9	1221.23	0.182963	0.0898804	2.03563	0.0417879	0.298854	Tmem87a
ENSMUSG00000029484.8	4512.71	0.134362	0.0660298	2.03487	0.041864	0.298932	Anxa3
ENSMUSG00000033730.2	246.705	0.356623	0.175239	2.03507	0.0418443	0.298932	Egr3
ENSMUSG00000030067.9	6457.73	0.123252	0.0605842	2.03439	0.041912	0.299047	Foxp1
ENSMUSG00000032253.6	2178.15	0.369546	0.181737	2.03341	0.0420113	0.299527	Phip
ENSMUSG00000064068.6	929.692	-0.210801	0.103727	-2.03227	0.0421266	0.30012	Mtx1
ENSMUSG00000046138.6	237.564	0.371646	0.182923	2.03171	0.042183	0.300293	9930021J03Rik
ENSMUSG00000013236.9	5960.23	0.134221	0.0660947	2.03074	0.0422816	0.300298	Ptprs
ENSMUSG00000084349.1	16877.9	-0.10607	0.0522398	-2.03044	0.0423122	0.300298	Rpl3-ps1
ENSMUSG00000038679.8	2770.7	0.153867	0.0757576	2.03105	0.0422499	0.300298	Trps1
ENSMUSG00000040455.11	715.821	0.236283	0.116367	2.03049	0.0423064	0.300298	Usp45
ENSMUSG00000072082.5	2510.75	-0.143603	0.070758	-2.02949	0.0424081	0.300654	Ccnf
ENSMUSG00000018677.3	2906.44	-0.138542	0.0682708	-2.02931	0.0424268	0.300654	Slc25a39
ENSMUSG00000030220.7	28736.9	-0.107114	0.0529297	-2.0237	0.043001	0.300846	Arhgdib
ENSMUSG00000060671.6	810.17	-0.221608	0.109387	-2.0259	0.0427747	0.300846	Atp8b2
ENSMUSG00000028478.11	6446.69	-0.120428	0.0594666	-2.02513	0.0428541	0.300846	Clta
ENSMUSG00000030970.9	1361.63	0.180723	0.0892861	2.02409	0.0429613	0.300846	Ctbp2
ENSMUSG00000042462.4	995.431	-0.195882	0.0967592	-2.02443	0.0429257	0.300846	Dctpp1
ENSMUSG00000036501.6	2157.69	0.151112	0.0745963	2.02574	0.0427918	0.300846	Fam13b
ENSMUSG00000004018.3	444.058	-0.269296	0.132978	-2.02511	0.0428557	0.300846	Fancl
ENSMUSG00000028048.5	3465.56	-0.141067	0.0696497	-2.02537	0.0428293	0.300846	Gba
ENSMUSG00000068284.7	1406.27	0.176867	0.087246	2.02722	0.04264	0.300846	Gm608
ENSMUSG00000040751.6	7898.66	-0.114734	0.056571	-2.02814	0.0425463	0.300846	Lat2
ENSMUSG00000041975.10	369.154	0.305509	0.150685	2.02748	0.0426137	0.300846	Mettl8
ENSMUSG00000018846.8	2687.42	0.162379	0.0800995	2.02722	0.0426401	0.300846	Pank3
ENSMUSG00000082016.1	3134.03	-0.136908	0.0675727	-2.02608	0.0427569	0.300846	Pgam1-ps2
ENSMUSG00000027593.9	7941.27	-0.112272	0.0554717	-2.02394	0.042976	0.300846	Raly
ENSMUSG00000021770.4	521.533	0.261138	0.12873	2.02858	0.042501	0.300846	Samd8
ENSMUSG00000048174.1	210.911	0.379641	0.187477	2.02499	0.042868	0.300846	Tmem81
ENSMUSG00000021969.6	2223.31	0.182932	0.0903458	2.0248	0.0428881	0.300846	Zdhhc20
ENSMUSG00000027363.8	3272.46	0.138362	0.0684013	2.0228	0.0430939	0.301271	Usp8
ENSMUSG00000020491.8	219.458	0.38151	0.18867	2.0221	0.0431662	0.301325	2810021J22Rik
ENSMUSG00000074165.4	211.026	0.379468	0.187636	2.02237	0.0431386	0.301325	Zfp788
ENSMUSG00000038991.9	4119.16	-0.126006	0.0623434	-2.02116	0.0432637	0.30178	Txndc5
ENSMUSG00000030060.8	2721.54	-0.139754	0.0692037	-2.01946	0.0434392	0.302328	8430410A17Rik
ENSMUSG00000060224.3	620.974	0.235044	0.116388	2.01949	0.0434362	0.302328	Pyroxd2
ENSMUSG00000009907.10	2821.61	0.147867	0.0732077	2.01983	0.0434008	0.302328	Vps4b
ENSMUSG00000035478.8	3491.18	-0.13234	0.0656128	-2.01698	0.0436973	0.303364	Mbd3
ENSMUSG00000054766.7	7916.12	0.122811	0.0608845	2.01711	0.0436838	0.303364	Set
ENSMUSG00000019804.6	3244.59	-0.135153	0.0670143	-2.01679	0.0437179	0.303364	Snx3
ENSMUSG00000039233.6	901.663	0.205383	0.101793	2.01766	0.0436267	0.303364	Tbce
ENSMUSG00000011382.6	1232.32	0.184972	0.091785	2.01527	0.043876	0.303626	Dhdh
ENSMUSG00000035234.11	577.123	0.244481	0.121286	2.01573	0.0438277	0.303626	Fam175a
ENSMUSG00000046721.9	12646.9	-0.122417	0.0607474	-2.01518	0.0438856	0.303626	Rpl14-ps1
ENSMUSG00000074093.3	1467.36	0.207518	0.102949	2.01573	0.0438285	0.303626	Svip
ENSMUSG00000054693.7	6852.07	0.137419	0.0682137	2.01454	0.0439528	0.303866	Adam10
ENSMUSG00000066637.1	267.225	0.343366	0.170485	2.01405	0.0440038	0.303994	Ttc32
ENSMUSG00000091086.1	4112.99	-0.139906	0.0695554	-2.01143	0.0442803	0.305678	Gm5428
ENSMUSG00000029404.9	2075.39	-0.15251	0.0759032	-2.00928	0.0445079	0.306643	Arl6ip4
ENSMUSG00000062081.3	696.422	-0.22323	0.111122	-2.00888	0.0445497	0.306643	Gm6055
ENSMUSG00000034154.8	1847.18	0.155298	0.0773058	2.00888	0.0445501	0.306643	Ino80
ENSMUSG00000039917.6	926.647	0.212018	0.105541	2.00887	0.0445513	0.306643	Rhbdd2
ENSMUSG00000043770.8	2052.95	-0.153189	0.0762864	-2.00808	0.044635	0.306993	Gm12481
ENSMUSG00000027133.3	1622.33	-0.163055	0.081246	-2.00694	0.0447566	0.307603	Nop10
ENSMUSG00000064147.6	12973.1	0.307274	0.153169	2.00611	0.0448448	0.307983	Rab44
ENSMUSG00000059743.7	5757.54	-0.120611	0.060154	-2.00504	0.044959	0.30854	Fdps
ENSMUSG00000054342.6	2245.75	-0.15245	0.0761022	-2.00322	0.0451532	0.309646	Kcnn4
ENSMUSG00000027613.9	3140.73	-0.138092	0.0689961	-2.00145	0.0453443	0.310728	Eif6
ENSMUSG00000053063.5	3362.86	0.145754	0.0729733	1.99735	0.0457867	0.311608	Clec12a
ENSMUSG00000022214.7	2387.41	-0.147096	0.0735929	-1.99878	0.045632	0.311608	Dcaf11
ENSMUSG00000060550.8	2035.18	-0.152114	0.0761784	-1.99682	0.0458448	0.311608	H2-Q7
ENSMUSG00000000673.8	649.948	-0.226235	0.113161	-1.99923	0.0455835	0.311608	Haao
ENSMUSG00000032293.7	2193.96	0.187132	0.0937269	1.99656	0.0458727	0.311608	Ireb2
ENSMUSG00000024948.7	2650.53	0.147616	0.0738465	1.99895	0.0456133	0.311608	Map4k2
ENSMUSG00000030824.8	12743.2	-0.106262	0.0532105	-1.997	0.0458249	0.311608	Nucb1
ENSMUSG00000028691.6	3969.79	-0.126974	0.063547	-1.99812	0.0457041	0.311608	Prdx1
ENSMUSG00000027010.8	3470.08	-0.134458	0.0672733	-1.99868	0.045643	0.311608	Slc25a12
ENSMUSG00000035227.5	5209.98	-0.129352	0.0647805	-1.99678	0.0458492	0.311608	Spcs2
ENSMUSG00000041736.6	3271.72	-0.138693	0.06937	-1.99932	0.0455732	0.311608	Tspo
ENSMUSG00000038344.8	471.014	0.258861	0.129587	1.99758	0.0457624	0.311608	Txlng
ENSMUSG00000028703.8	1401.28	-0.170834	0.0856992	-1.99341	0.0462164	0.313714	Lrrc41
ENSMUSG00000034647.8	422.885	0.2797	0.140438	1.99162	0.0464129	0.314125	Ankrd12
ENSMUSG00000037373.8	6900.26	-0.116664	0.0585862	-1.99133	0.046445	0.314125	Ctbp1
ENSMUSG00000020745.9	5226.69	0.128579	0.0645391	1.99227	0.0463414	0.314125	Pafah1b1
ENSMUSG00000005873.5	3662.12	-0.132505	0.0665407	-1.99134	0.0464432	0.314125	Reep5
ENSMUSG00000078619.4	4704.95	-0.121922	0.0612119	-1.99181	0.0463924	0.314125	Smarcd2
ENSMUSG00000017404.6	2057.64	-0.168223	0.0845271	-1.99017	0.0465727	0.314761	Rpl19
ENSMUSG00000001829.9	1333.32	-0.180245	0.0905833	-1.98982	0.0466104	0.314789	Clpb
ENSMUSG00000038225.8	591.628	0.237694	0.119536	1.98848	0.0467591	0.314918	Ccdc111
ENSMUSG00000032562.7	21372.1	-0.100642	0.0506139	-1.98843	0.0467643	0.314918	Gnai2
ENSMUSG00000031153.9	1311.02	0.194274	0.0976851	1.98878	0.0467254	0.314918	Gripap1
ENSMUSG00000035840.6	230.478	0.383421	0.192793	1.98877	0.0467264	0.314918	Lysmd3
ENSMUSG00000022892.9	21321.5	0.100396	0.0505027	1.98793	0.0468198	0.315065	App
ENSMUSG00000066800.3	1061.02	0.19844	0.0998776	1.98684	0.0469407	0.315424	Rnasel
ENSMUSG00000023277.5	3479.34	-0.130678	0.065769	-1.98693	0.0469302	0.315424	Twf2
ENSMUSG00000031601.10	1639.83	0.170181	0.0856741	1.98638	0.0469915	0.315538	Cnot7
ENSMUSG00000031007.2	3774.61	0.129491	0.0652381	1.9849	0.0471551	0.316075	Atp6ap2
ENSMUSG00000018293.3	27396.9	-0.0989944	0.0498777	-1.98475	0.0471728	0.316075	Pfn1
ENSMUSG00000047921.8	1302.54	-0.176232	0.0887687	-1.98529	0.0471119	0.316075	Trappc9
ENSMUSG00000025731.8	256.556	-0.339511	0.171144	-1.98378	0.0472805	0.316343	0610011F06Rik
ENSMUSG00000004530.6	4781.4	-0.120956	0.06097	-1.98387	0.0472706	0.316343	Coro1c
ENSMUSG00000025451.8	1395.56	0.179439	0.0904993	1.98276	0.0473938	0.31644	Paip1
ENSMUSG00000038683.9	1578.31	-0.161506	0.081456	-1.98274	0.0473966	0.31644	Pak1ip1
ENSMUSG00000028898.9	752.075	-0.21698	0.109404	-1.98329	0.0473356	0.31644	Trnau1ap
ENSMUSG00000082433.1	3098.29	-0.136684	0.0689684	-1.98184	0.0474975	0.31688	Gm9025
ENSMUSG00000013663.7	5007.69	0.151656	0.0765386	1.98142	0.0475437	0.31688	Pten
ENSMUSG00000063659.6	1345.32	0.172734	0.0871848	1.98124	0.0475641	0.31688	Zfp238
ENSMUSG00000071646.3	8381.35	-0.10996	0.0555254	-1.98036	0.0476634	0.317315	Mta2
ENSMUSG00000032030.9	1128.79	0.196862	0.0994798	1.97892	0.0478253	0.31794	Cul5
ENSMUSG00000007564.8	6252.9	-0.122146	0.0617227	-1.97894	0.0478226	0.31794	Ppp2r1a
ENSMUSG00000016239.5	470.135	0.260653	0.131797	1.97769	0.0479638	0.318634	Lonrf3
ENSMUSG00000025967.9	16089.9	-0.115923	0.0586519	-1.97646	0.0481027	0.319329	Eef1b2
ENSMUSG00000030965.10	1340.21	0.170071	0.0861118	1.975	0.0482676	0.320197	Fam175b
ENSMUSG00000020048.7	15597.5	0.122709	0.0621946	1.97299	0.0484971	0.321036	Hsp90b1
ENSMUSG00000053560.4	5088.75	-0.130064	0.0659224	-1.97299	0.048497	0.321036	Ier2
ENSMUSG00000037321.9	5844.82	-0.115534	0.0585516	-1.9732	0.0484727	0.321036	Tap1
ENSMUSG00000019689.4	244.727	-0.347823	0.176399	-1.9718	0.0486328	0.321479	1110001J03Rik
ENSMUSG00000055884.6	814.092	0.22566	0.114443	1.97181	0.0486314	0.321479	Fancm
ENSMUSG00000032589.7	455.985	-0.263517	0.13377	-1.96992	0.048848	0.322053	Bsn
ENSMUSG00000027447.6	4871.88	-0.124269	0.0630653	-1.97048	0.0487833	0.322053	Cst3
ENSMUSG00000025794.7	6716.79	-0.130537	0.0662621	-1.97001	0.048837	0.322053	Rpl14
ENSMUSG00000079470.2	460.244	0.263213	0.133622	1.96983	0.0488574	0.322053	Utp14b
ENSMUSG00000035890.7	2369.16	-0.141912	0.0720606	-1.96935	0.0489131	0.322192	Rnf126
ENSMUSG00000024952.5	1282.71	-0.18076	0.091878	-1.96739	0.0491377	0.323276	Rps6ka4
ENSMUSG00000020876.8	947.622	0.203196	0.103286	1.96732	0.0491469	0.323276	Snx11
ENSMUSG00000024900.4	1842.63	-0.156497	0.0795651	-1.96691	0.0491935	0.323356	Cpt1a
ENSMUSG00000055322.7	434.822	-0.289019	0.14715	-1.96411	0.0495172	0.325254	Tns1
ENSMUSG00000039244.4	1845.05	-0.151135	0.0769674	-1.96362	0.0495739	0.325346	E130309D02Rik
ENSMUSG00000057530.7	1347.2	-0.169596	0.0863793	-1.96339	0.0496008	0.325346	Ece1
ENSMUSG00000038611.10	3711	0.128018	0.0652147	1.96303	0.049643	0.325395	Phrf1
ENSMUSG00000025757.7	875.564	0.210467	0.107234	1.96269	0.0496827	0.325427	Hspa4l
ENSMUSG00000016024.3	1180.33	0.179916	0.0917885	1.96011	0.0499828	0.327163	Lbp
ENSMUSG00000041220.6	2014.1	0.185749	0.0948139	1.95909	0.0501026	0.32726	Elovl6
ENSMUSG00000024696.8	830.353	-0.20266	0.103443	-1.95914	0.0500962	0.32726	Lpxn
ENSMUSG00000024735.6	5320.19	-0.118441	0.0604464	-1.95944	0.0500618	0.32726	Prpf19
ENSMUSG00000022601.9	1288.52	0.17664	0.0901988	1.95834	0.0501901	0.327602	Rpl24
ENSMUSG00000020689.3	5250.12	-0.13707	0.0700108	-1.95784	0.0502491	0.327759	Itgb3
ENSMUSG00000037049.8	758.807	-0.210737	0.107726	-1.95624	0.0504367	0.328432	Smpd1
ENSMUSG00000026966.6	1933.34	-0.151786	0.0775768	-1.95659	0.0503957	0.328432	Ssna1
ENSMUSG00000058672.6	652.875	-0.220548	0.112751	-1.95606	0.0504577	0.328432	Tubb2a
ENSMUSG00000013646.10	1132.93	-0.178803	0.091515	-1.95381	0.0507241	0.329936	Sh3bp5l
ENSMUSG00000033054.7	841.448	0.227753	0.116632	1.95276	0.0508482	0.330513	Npat
ENSMUSG00000048249.7	534.467	0.258604	0.132677	1.94913	0.0512796	0.330787	A930001N09Rik
ENSMUSG00000037692.8	954.713	-0.201348	0.103288	-1.94938	0.0512506	0.330787	Ahdc1
ENSMUSG00000032059.6	788.938	-0.20311	0.104173	-1.94973	0.0512083	0.330787	Alg9
ENSMUSG00000078695.2	273.52	-0.323566	0.165966	-1.94959	0.0512247	0.330787	Cisd3
ENSMUSG00000040314.1	16307.5	-0.11387	0.0583516	-1.95145	0.0510036	0.330787	Ctsg
ENSMUSG00000024137.8	550.246	0.241361	0.123771	1.95006	0.0511685	0.330787	E4f1
ENSMUSG00000058503.7	801.309	0.221325	0.11351	1.94983	0.051197	0.330787	Fam133b
ENSMUSG00000061778.3	516.519	0.251073	0.128759	1.94995	0.0511823	0.330787	Mospd2
ENSMUSG00000042694.9	308.583	-0.305202	0.156525	-1.94987	0.051192	0.330787	Obfc1
ENSMUSG00000079614.3	2252.51	0.148456	0.0761482	1.94957	0.0512272	0.330787	Seh1l
ENSMUSG00000010045.1	677.652	-0.221604	0.113591	-1.95089	0.0510697	0.330787	Tmem115
ENSMUSG00000056260.8	422.881	0.280203	0.143981	1.94611	0.0516415	0.331231	4933421E11Rik
ENSMUSG00000059562.6	693.657	0.213916	0.109831	1.94768	0.0514533	0.331231	Ccdc154
ENSMUSG00000007682.5	247.34	0.393982	0.202425	1.94631	0.0516174	0.331231	Dio2
ENSMUSG00000031774.7	1598.69	-0.161343	0.0829122	-1.94595	0.0516603	0.331231	Fam192a
ENSMUSG00000038604.8	5059.76	-0.131262	0.0674282	-1.9467	0.0515711	0.331231	Fam65a
ENSMUSG00000028869.7	2000.46	0.160122	0.0822864	1.94591	0.0516656	0.331231	Gnl2
ENSMUSG00000037523.7	1333.56	-0.170861	0.0878057	-1.94589	0.0516674	0.331231	Mavs
ENSMUSG00000066307.5	207.192	0.379894	0.195147	1.94671	0.0515697	0.331231	Rad54b
ENSMUSG00000034317.8	2209.88	0.149476	0.076779	1.94684	0.0515541	0.331231	Trim59
ENSMUSG00000004568.6	3397.28	-0.133359	0.0685676	-1.94493	0.051783	0.331291	Arhgef18
ENSMUSG00000008855.10	3402.02	-0.130641	0.0671628	-1.94513	0.0517589	0.331291	Hdac5
ENSMUSG00000035413.8	344.367	-0.300878	0.154657	-1.94546	0.0517201	0.331291	Tmem98
ENSMUSG00000040842.11	3446.35	-0.127789	0.0657642	-1.94314	0.0519993	0.33222	D4Ertd22e
ENSMUSG00000002486.9	531.54	0.242181	0.124625	1.94327	0.0519835	0.33222	Tchp
ENSMUSG00000024858.7	15261.3	-0.106427	0.054779	-1.94283	0.0520363	0.332229	Adrbk1
ENSMUSG00000024294.7	3099.15	0.131966	0.0680133	1.9403	0.052343	0.333959	Mib1
ENSMUSG00000022812.7	2724.88	0.133332	0.0687397	1.93966	0.0524212	0.33423	Gsk3b
ENSMUSG00000074656.6	2278.74	0.170891	0.0881599	1.93842	0.0525725	0.334829	Eif2s2
ENSMUSG00000024953.9	5577.55	0.11418	0.0589071	1.9383	0.0525869	0.334829	Prdx5
ENSMUSG00000059479.6	1554.33	-0.157376	0.0812665	-1.93654	0.0528014	0.335738	B3gnt8
ENSMUSG00000006471.10	1636.79	0.193252	0.0997778	1.93682	0.0527669	0.335738	Ndor1
ENSMUSG00000062762.7	2545.52	-0.137615	0.0710909	-1.93576	0.0528975	0.336121	Ei24
ENSMUSG00000026356.9	4537.46	0.12598	0.065137	1.93408	0.0531036	0.336515	Dars
ENSMUSG00000087645.1	231.011	0.36774	0.190057	1.93489	0.0530035	0.336515	F630040L22Rik
ENSMUSG00000020766.4	2349.76	-0.141386	0.0731023	-1.93409	0.0531027	0.336515	Galk1
ENSMUSG00000070610.4	823.102	-0.20104	0.103923	-1.93451	0.0530503	0.336515	Gm13127
ENSMUSG00000028191.9	1727.31	-0.155295	0.0803327	-1.93314	0.0532188	0.336788	Bcl10
ENSMUSG00000029713.9	11523.9	-0.103018	0.0532855	-1.93333	0.0531957	0.336788	Gnb2
ENSMUSG00000018507.10	1738.11	-0.154011	0.0796915	-1.93259	0.0532869	0.336991	Trpv2
ENSMUSG00000063439.6	786.608	-0.204044	0.105615	-1.93196	0.053364	0.337022	B9d2
ENSMUSG00000014867.3	11066.2	-0.104123	0.0538874	-1.93222	0.0533319	0.337022	Surf4
ENSMUSG00000039899.5	29728.3	0.130819	0.0677348	1.93135	0.0534402	0.337048	Fgl2
ENSMUSG00000036781.7	3832.22	-0.12631	0.0653942	-1.93151	0.0534198	0.337048	Rps27l
ENSMUSG00000047180.6	2519.01	-0.144915	0.0750641	-1.93056	0.053538	0.337437	Neurl3
ENSMUSG00000025204.4	1607.56	-0.158175	0.0819605	-1.92989	0.0536205	0.337503	Ndufb8
ENSMUSG00000032423.6	5162.13	0.128264	0.0664584	1.92999	0.0536076	0.337503	Syncrip
ENSMUSG00000060214.6	10814.3	-0.116139	0.0602025	-1.92913	0.0537147	0.337503	Gm8203
ENSMUSG00000027641.7	3246.49	0.138257	0.0716726	1.92902	0.0537289	0.337503	Rbl1
ENSMUSG00000027660.9	647.242	0.220881	0.114475	1.92951	0.0536676	0.337503	Skil
ENSMUSG00000022641.8	1320.23	0.176165	0.0914475	1.92641	0.0540531	0.338252	Bbx
ENSMUSG00000015189.5	1385.73	0.173449	0.0900825	1.92544	0.0541739	0.338252	Casd1
ENSMUSG00000042699.5	9468.62	0.108116	0.0561344	1.92603	0.0541009	0.338252	Dhx9
ENSMUSG00000021728.7	15054.6	0.12024	0.062419	1.92633	0.054063	0.338252	Emb
ENSMUSG00000057605.4	359.845	-0.291104	0.151081	-1.92681	0.0540036	0.338252	Gm6807
ENSMUSG00000022681.8	699.853	-0.215059	0.111627	-1.92659	0.0540304	0.338252	Ntan1
ENSMUSG00000040945.6	20028.1	-0.104432	0.0541959	-1.92693	0.0539885	0.338252	Rcc2
ENSMUSG00000031715.8	3076.07	0.16994	0.0882381	1.92592	0.0541143	0.338252	Smarca5
ENSMUSG00000023456.7	9736.12	-0.106859	0.0554953	-1.92554	0.0541618	0.338252	Tpi1
ENSMUSG00000021470.10	915.042	0.206118	0.107156	1.92353	0.0544135	0.338596	0610007P08Rik
ENSMUSG00000018412.9	2992.6	0.131603	0.0684319	1.92312	0.0544648	0.338596	1700081L11Rik
ENSMUSG00000029034.3	1607.55	-0.155428	0.0808433	-1.92259	0.0545321	0.338596	Cpsf3l
ENSMUSG00000028479.11	1941.68	-0.151299	0.0786291	-1.92421	0.0543284	0.338596	Gne
ENSMUSG00000090430.1	224.663	0.351651	0.182831	1.92336	0.0544347	0.338596	Snhg4
ENSMUSG00000033014.6	1450.24	0.17528	0.09115	1.92299	0.0544815	0.338596	Trim33
ENSMUSG00000041057.9	3225.33	0.143585	0.0746345	1.92384	0.0543752	0.338596	Wdr43
ENSMUSG00000054823.8	3579.23	0.124653	0.0648425	1.9224	0.054555	0.338596	Whsc1l1
ENSMUSG00000039841.8	636.08	0.234349	0.121897	1.92251	0.0545412	0.338596	Zfp800
ENSMUSG00000059820.7	967.066	0.188985	0.098369	1.92119	0.0547081	0.338652	AU019823
ENSMUSG00000006010.8	788.977	0.229234	0.119286	1.92172	0.0546414	0.338652	BC003331
ENSMUSG00000031834.9	2098.67	-0.144227	0.0750417	-1.92196	0.0546105	0.338652	Pik3r2
ENSMUSG00000041959.8	629.81	-0.222313	0.115717	-1.92118	0.0547089	0.338652	S100a10
ENSMUSG00000053641.7	1802.08	0.169008	0.0880059	1.92042	0.0548049	0.338973	Dennd4a
ENSMUSG00000040044.5	1720.71	0.164537	0.0856876	1.92019	0.0548333	0.338973	Orc3
ENSMUSG00000024826.8	3260.27	-0.129036	0.0672134	-1.9198	0.0548836	0.33906	Dpf2
ENSMUSG00000030265.7	1385.17	0.171748	0.089476	1.91948	0.054923	0.339079	Kras
ENSMUSG00000022533.7	5792.09	0.131226	0.0683919	1.91874	0.0550175	0.339238	Atp13a3
ENSMUSG00000022811.9	1809.72	0.173059	0.0901955	1.91871	0.0550213	0.339238	Zfp148
ENSMUSG00000004849.8	2721.38	-0.133724	0.0697143	-1.91817	0.0550897	0.339436	Ap1s1
ENSMUSG00000028843.8	9436.96	-0.109008	0.0568436	-1.91768	0.0551521	0.339596	Sh3bgrl3
ENSMUSG00000089993.1	528.461	-0.246208	0.128494	-1.9161	0.0553522	0.340604	Gm5822
ENSMUSG00000028796.10	1657.88	-0.152726	0.0798657	-1.91228	0.0558402	0.342929	Phc2
ENSMUSG00000068396.7	3254.5	-0.129527	0.0677169	-1.91278	0.0557766	0.342929	Rpl34-ps1
ENSMUSG00000024695.9	7191.86	0.109012	0.057002	1.91242	0.0558225	0.342929	Zfp91
ENSMUSG00000027496.9	2252.76	-0.14471	0.0756994	-1.91164	0.0559218	0.343205	Aurka
ENSMUSG00000035048.7	708.181	-0.209268	0.109495	-1.91122	0.0559768	0.343317	Anapc13
ENSMUSG00000022407.2	2569.85	-0.133678	0.0700727	-1.90771	0.0564292	0.344794	Adsl
ENSMUSG00000019087.7	6517.9	-0.116872	0.0612656	-1.90763	0.056439	0.344794	Atp6ap1
ENSMUSG00000046722.8	5144.32	-0.124227	0.0650823	-1.90877	0.0562919	0.344794	Cdc42se1
ENSMUSG00000045438.6	466.037	-0.252303	0.132246	-1.90783	0.0564131	0.344794	Cox19
ENSMUSG00000041415.8	2980.93	0.132415	0.0693699	1.90882	0.0562853	0.344794	Dicer1
ENSMUSG00000028180.10	2165.43	0.166075	0.0870511	1.90779	0.0564188	0.344794	Zranb2
ENSMUSG00000024121.7	4138.11	0.152718	0.0801081	1.9064	0.0565988	0.345303	Atp6v0c
ENSMUSG00000028745.12	10887.3	-0.104577	0.0548636	-1.90613	0.056633	0.345303	Capzb
ENSMUSG00000030269.7	1296.94	-0.166596	0.0873785	-1.9066	0.0565726	0.345303	Mtmr14
ENSMUSG00000042742.5	485.474	0.249161	0.130786	1.9051	0.0567673	0.345895	B630005N14Rik
ENSMUSG00000034165.8	9158.91	-0.115151	0.060504	-1.9032	0.057015	0.346277	Ccnd3
ENSMUSG00000030678.5	9862.48	-0.111201	0.0584278	-1.90322	0.0570117	0.346277	Maz
ENSMUSG00000052698.7	1173.2	-0.172221	0.0904727	-1.90357	0.0569666	0.346277	Tln2
ENSMUSG00000033777.3	375.862	0.274812	0.144356	1.90371	0.0569474	0.346277	Tlr13
ENSMUSG00000022390.9	3646.23	-0.124028	0.0651591	-1.90347	0.0569796	0.346277	Zc3h7b
ENSMUSG00000015027.9	3057.4	-0.12776	0.0671411	-1.90286	0.0570593	0.34632	Galns
ENSMUSG00000043740.7	253.698	0.344847	0.1813	1.90208	0.0571608	0.346711	B430306N03Rik
ENSMUSG00000028106.8	1927.55	0.148327	0.078004	1.90154	0.0572318	0.346917	Rprd2
ENSMUSG00000050347.4	286.428	-0.30655	0.161275	-1.90079	0.0573296	0.347261	Gm9844
ENSMUSG00000036565.3	4910.15	-0.121538	0.0639493	-1.90054	0.0573629	0.347261	Ttyh3
ENSMUSG00000006398.7	2845	-0.134628	0.0708902	-1.89911	0.0575504	0.34772	Cdc20
ENSMUSG00000070035.2	873.161	-0.19525	0.102801	-1.8993	0.0575254	0.34772	Gm4885
ENSMUSG00000009535.7	1695.06	0.152875	0.0804867	1.89938	0.0575145	0.34772	Rnmt
ENSMUSG00000032047.5	3151.4	-0.130217	0.0685829	-1.89868	0.0576069	0.347837	Acat1
ENSMUSG00000064367.1	26854.4	-0.11849	0.0624253	-1.89811	0.0576816	0.347839	mt-Nd5
ENSMUSG00000020733.3	2933.63	-0.131692	0.0693796	-1.89813	0.0576783	0.347839	Slc9a3r1
ENSMUSG00000020170.3	1132.56	0.173312	0.0913475	1.89728	0.0577911	0.348274	Frs2
ENSMUSG00000026979.10	5846.69	-0.118947	0.0627188	-1.89652	0.0578915	0.348654	Psd4
ENSMUSG00000026020.2	4069.62	0.156153	0.0823531	1.89615	0.0579408	0.348727	Nop58
ENSMUSG00000066491.4	255.649	-0.324666	0.171329	-1.89499	0.0580941	0.349425	Gm6265
ENSMUSG00000006362.9	3323.71	-0.127395	0.0672777	-1.89357	0.058282	0.350015	Cbfa2t3
ENSMUSG00000028228.5	993.56	0.186366	0.0984049	1.89387	0.0582419	0.350015	Cpne3
ENSMUSG00000036199.8	1573.16	-0.153721	0.0811977	-1.89317	0.058335	0.350015	Ndufa13
ENSMUSG00000059734.6	1622.84	-0.156139	0.082477	-1.89312	0.0583421	0.350015	Ndufs8
ENSMUSG00000033454.5	1079	0.177421	0.0938009	1.89146	0.0585631	0.351116	Zbtb1
ENSMUSG00000020392.8	3363.05	-0.127062	0.067207	-1.8906	0.0586775	0.351351	Cdkn2aipnl
ENSMUSG00000084013.1	1015.09	-0.180478	0.0954597	-1.89062	0.0586757	0.351351	Gm14270
ENSMUSG00000034664.7	429.384	0.281828	0.149159	1.88945	0.0588315	0.351941	Itga2b
ENSMUSG00000024516.6	4610.43	0.116609	0.0617205	1.8893	0.0588513	0.351941	Sec11c
ENSMUSG00000020453.10	2816.9	-0.129912	0.0687725	-1.88901	0.0588905	0.35195	Patz1
ENSMUSG00000026657.8	689.933	0.208799	0.110631	1.88735	0.0591138	0.353059	Frmd4a
ENSMUSG00000079557.4	945.52	-0.183407	0.0972005	-1.88689	0.0591745	0.353196	March2
ENSMUSG00000068706.1	1767.25	-0.1657	0.0878577	-1.88601	0.0592942	0.353684	Gm10250
ENSMUSG00000041235.5	3862.68	0.138587	0.0735074	1.88535	0.0593822	0.353983	Chd7
ENSMUSG00000049659.7	1754.19	0.160614	0.085239	1.88428	0.059527	0.354054	Aftph
ENSMUSG00000033102.8	551.171	0.230153	0.122106	1.88486	0.0594486	0.354054	Cdc14b
ENSMUSG00000034826.8	905.746	0.186297	0.0989011	1.88367	0.0596091	0.354054	Nup54
ENSMUSG00000030744.6	36143.9	-0.096405	0.0511669	-1.88413	0.0595475	0.354054	Rps3
ENSMUSG00000035236.10	274.649	0.330679	0.1755	1.88421	0.0595361	0.354054	Scai
ENSMUSG00000037957.8	629.391	0.216948	0.115179	1.88358	0.0596214	0.354054	Wdr20a
ENSMUSG00000066357.4	2883	-0.13433	0.0713585	-1.88246	0.0597732	0.35473	Wdr6
ENSMUSG00000027709.3	634.3	0.214309	0.113899	1.88158	0.0598935	0.354994	Mccc1
ENSMUSG00000063480.7	1764.15	-0.149673	0.0795379	-1.88178	0.0598661	0.354994	Nhp2l1
ENSMUSG00000030399.1	1233.61	-0.167567	0.0892589	-1.87731	0.0604758	0.355067	Ckm
ENSMUSG00000026385.9	2466.02	-0.135746	0.0721927	-1.88032	0.060064	0.355067	Dbi
ENSMUSG00000020075.7	8969.89	0.104433	0.0556187	1.87767	0.060427	0.355067	Ddx21
ENSMUSG00000020076.5	1396.41	0.162863	0.0867115	1.87821	0.0603518	0.355067	Ddx50
ENSMUSG00000061104.4	1732.1	-0.156369	0.0832454	-1.87841	0.0603255	0.355067	Gm10094
ENSMUSG00000026827.6	2516.84	0.132944	0.0707942	1.8779	0.0603949	0.355067	Gpd2
ENSMUSG00000019188.9	7325.16	-0.109473	0.0582	-1.88099	0.0599737	0.355067	H13
ENSMUSG00000018858.9	801.105	-0.204723	0.109018	-1.87789	0.0603959	0.355067	Ict1
ENSMUSG00000025220.6	5618.44	0.113025	0.0601448	1.87921	0.0602162	0.355067	Mgea5
ENSMUSG00000019841.8	910.38	0.222944	0.118633	1.87927	0.060208	0.355067	Rev3l
ENSMUSG00000020496.8	3338.11	-0.127704	0.0680241	-1.87733	0.0604724	0.355067	Rnf187
ENSMUSG00000003868.6	3914.79	-0.125273	0.0666468	-1.87965	0.060156	0.355067	Ruvbl2
ENSMUSG00000037936.9	5546.84	-0.115643	0.0615171	-1.87985	0.0601291	0.355067	Scarb1
ENSMUSG00000032602.5	530.523	-0.242222	0.128863	-1.87969	0.0601503	0.355067	Slc25a20
ENSMUSG00000037286.8	2193.12	0.174819	0.0930251	1.87927	0.0602083	0.355067	Stag1
ENSMUSG00000030982.9	2447.98	-0.134577	0.0717149	-1.87656	0.0605784	0.355447	9030624J02Rik
ENSMUSG00000018666.7	1986.58	0.14869	0.079277	1.87558	0.0607135	0.356016	Cbx1
ENSMUSG00000041238.8	1139.52	0.174878	0.093262	1.87512	0.060776	0.356159	Rbbp8
ENSMUSG00000021668.7	661.691	0.222784	0.118906	1.87361	0.0609843	0.357101	Polk
ENSMUSG00000052926.9	1289.44	-0.167437	0.0893762	-1.8734	0.0610132	0.357101	Rnaseh2a
ENSMUSG00000035093.9	1345.87	0.178048	0.095067	1.87287	0.0610866	0.357307	Secisbp2l
ENSMUSG00000063904.3	4502.26	-0.118933	0.0635148	-1.87253	0.061133	0.357355	Dpp3
ENSMUSG00000060032.4	2433.05	-0.13916	0.0743339	-1.8721	0.0611932	0.357483	H2afj
ENSMUSG00000007891.8	17732.9	-0.10018	0.0535653	-1.87024	0.0614506	0.358428	Ctsd
ENSMUSG00000015745.3	1993.72	-0.142358	0.0761179	-1.87022	0.0614528	0.358428	Plekho1
ENSMUSG00000023104.6	4081.56	-0.116651	0.0623769	-1.8701	0.06147	0.358428	Rfc2
ENSMUSG00000066979.5	4616.14	-0.118123	0.0632282	-1.8682	0.0617345	0.359521	Bub3
ENSMUSG00000030341.10	3318.7	-0.122263	0.0654439	-1.86822	0.0617321	0.359521	Tnfrsf1a
ENSMUSG00000037608.8	4333.69	0.265169	0.141971	1.86776	0.0617948	0.359649	Bclaf1
ENSMUSG00000026319.6	1281.35	0.163674	0.0877187	1.86589	0.0620565	0.360051	2310035C23Rik
ENSMUSG00000026289.8	1120.79	0.171821	0.0920736	1.86612	0.062024	0.360051	Atg16l1
ENSMUSG00000049305.5	1079.82	-0.178085	0.0954156	-1.86642	0.0619832	0.360051	Ccdc71
ENSMUSG00000038212.9	2559.9	0.130774	0.0700497	1.86687	0.0619192	0.360051	Hiatl1
ENSMUSG00000059316.2	879.796	-0.186756	0.100087	-1.86595	0.0620489	0.360051	Slc27a4
ENSMUSG00000015961.8	4679.93	0.132657	0.0711554	1.86433	0.0622752	0.360814	Adss
ENSMUSG00000024381.8	1027.09	-0.179389	0.0962174	-1.86441	0.0622644	0.360814	Bin1
ENSMUSG00000091421.1	2541.94	-0.137712	0.0739042	-1.86339	0.0624076	0.360814	Gm17510
ENSMUSG00000022516.8	1594.35	-0.151318	0.0811993	-1.86353	0.0623871	0.360814	Nudt16l1
ENSMUSG00000038324.7	4903.97	-0.113662	0.0610002	-1.8633	0.0624196	0.360814	Trpc4ap
ENSMUSG00000020163.6	1034.62	-0.189068	0.101465	-1.86338	0.0624091	0.360814	Uqcr11
ENSMUSG00000000982.5	1749.06	-0.154896	0.0831437	-1.86299	0.062464	0.360848	Ccl3
ENSMUSG00000044150.6	418.092	0.292137	0.156916	1.86174	0.062639	0.361259	A830080D01Rik
ENSMUSG00000055923.9	351.546	0.278331	0.149683	1.85947	0.0629604	0.361259	Aasdh
ENSMUSG00000079426.6	8737.01	-0.103378	0.0555162	-1.86212	0.0625858	0.361259	Arpc4
ENSMUSG00000031023.5	616.398	-0.216345	0.116267	-1.86076	0.0627778	0.361259	D930014E17Rik
ENSMUSG00000087153.1	227.648	0.338114	0.181791	1.85991	0.0628983	0.361259	Gm6483
ENSMUSG00000054720.6	800.314	-0.195389	0.105074	-1.85953	0.0629524	0.361259	Lrrc8c
ENSMUSG00000020456.10	8602.77	-0.112462	0.0604248	-1.8612	0.0627165	0.361259	Ogdh
ENSMUSG00000019763.5	416.237	0.270176	0.14519	1.86084	0.0627665	0.361259	Rmnd1
ENSMUSG00000067847.7	640.145	-0.212619	0.11433	-1.8597	0.0629273	0.361259	Romo1
ENSMUSG00000020919.5	2787.77	-0.127957	0.0688091	-1.85959	0.062943	0.361259	Stat5b
ENSMUSG00000056305.3	1336.13	-0.166285	0.0893376	-1.86132	0.0626995	0.361259	Usp39
ENSMUSG00000049800.7	1127.17	0.173171	0.093196	1.85814	0.0631496	0.362123	Sertad2
ENSMUSG00000030282.8	2352.37	-0.133357	0.0718858	-1.85513	0.0635781	0.362828	Cmas
ENSMUSG00000030610.7	401.967	-0.261553	0.140932	-1.85589	0.0634698	0.362828	Det1
ENSMUSG00000037210.8	1291.28	-0.164787	0.0887682	-1.85637	0.0634007	0.362828	Fam193a
ENSMUSG00000024816.6	3014.53	-0.127564	0.0687714	-1.85489	0.0636116	0.362828	Frmd8
ENSMUSG00000058006.5	4408.03	0.122744	0.0661553	1.85539	0.0635402	0.362828	Mdn1
ENSMUSG00000024999.7	874.24	0.189245	0.101911	1.85696	0.0633171	0.362828	Noc3l
ENSMUSG00000091207.1	728.176	0.21103	0.11367	1.85652	0.0633793	0.362828	Purb
ENSMUSG00000014873.8	665.673	0.207263	0.111733	1.85499	0.0635976	0.362828	Surf2
ENSMUSG00000025171.1	1221.58	-0.164403	0.0886358	-1.85482	0.063622	0.362828	Ubtd1
ENSMUSG00000031861.8	1005.03	0.182165	0.0982441	1.85421	0.0637092	0.363104	Lpar2
ENSMUSG00000016252.7	3157.13	-0.123981	0.066895	-1.85337	0.0638288	0.363564	Atp5e
ENSMUSG00000033237.10	7066.72	0.116173	0.0626984	1.85289	0.0638983	0.363568	Arid2
ENSMUSG00000036473.8	1515.83	0.152728	0.0824296	1.85283	0.0639074	0.363568	Tbc1d24
ENSMUSG00000006423.8	1260.85	0.165281	0.0893645	1.84952	0.0643832	0.363897	C330007P06Rik
ENSMUSG00000070343.1	10104	-0.104257	0.0563783	-1.84924	0.0644237	0.363897	Gm10288
ENSMUSG00000028931.5	7410.04	-0.109874	0.0593851	-1.8502	0.0642843	0.363897	Kcnab2
ENSMUSG00000021693.12	1300.83	0.162189	0.0877343	1.84864	0.0645103	0.363897	Kif2a
ENSMUSG00000019920.10	5308.4	0.131683	0.0711672	1.85033	0.064266	0.363897	Lims1
ENSMUSG00000024767.5	2200.48	-0.135799	0.0733543	-1.85127	0.0641303	0.363897	Otub1
ENSMUSG00000067038.4	1050.28	-0.181826	0.0983277	-1.84919	0.0644309	0.363897	Rps12-ps3
ENSMUSG00000034460.6	524.477	0.233236	0.126148	1.84892	0.0644698	0.363897	Six4
ENSMUSG00000003528.8	2226.12	-0.136013	0.0735705	-1.84874	0.064495	0.363897	Slc25a1
ENSMUSG00000038517.8	1541.87	0.169931	0.0918416	1.85026	0.0642762	0.363897	Tbkbp1
ENSMUSG00000036676.8	372.994	0.289371	0.15624	1.85209	0.0640125	0.363897	Tmtc3
ENSMUSG00000000275.9	3313.2	0.123644	0.0668379	1.84991	0.0643264	0.363897	Trim25
ENSMUSG00000019820.8	1450.2	0.159329	0.0861839	1.8487	0.0645004	0.363897	Utrn
ENSMUSG00000015342.6	307.597	0.309753	0.167425	1.8501	0.0642991	0.363897	Xk
ENSMUSG00000041498.7	1133.68	0.169676	0.0918291	1.84774	0.0646398	0.364408	Kif14
ENSMUSG00000019715.8	2064.57	-0.138274	0.0748611	-1.84707	0.0647369	0.364515	Gle1
ENSMUSG00000025237.8	424.956	0.268023	0.145086	1.84733	0.0646992	0.364515	Parp6
ENSMUSG00000024639.5	2187.53	0.135356	0.073317	1.84617	0.0648674	0.364811	Gnaq
ENSMUSG00000022672.7	1535.92	0.165583	0.0896839	1.8463	0.0648489	0.364811	Prkdc
ENSMUSG00000025781.8	5126.35	-0.115615	0.0626341	-1.84588	0.0649101	0.364831	Atp5c1
ENSMUSG00000036398.7	936.154	-0.192909	0.104524	-1.8456	0.0649501	0.364837	Ppp1r11
ENSMUSG00000020134.7	566.932	0.220079	0.119295	1.84484	0.0650611	0.365241	Peli1
ENSMUSG00000058761.3	1361.37	0.171458	0.0929533	1.84456	0.0651022	0.365252	Rnf169
ENSMUSG00000066415.3	2546.65	0.132439	0.0718155	1.84416	0.0651599	0.365357	Msl2
ENSMUSG00000003033.8	3860.14	-0.120428	0.0653458	-1.84293	0.0653397	0.365562	Ap1m1
ENSMUSG00000001128.7	9158.41	-0.103636	0.0562476	-1.8425	0.0654024	0.365562	Cfp
ENSMUSG00000073859.2	567.861	0.221813	0.1204	1.8423	0.0654312	0.365562	Itpripl2
ENSMUSG00000019731.6	3821.5	-0.118473	0.0642774	-1.84315	0.0653067	0.365562	Slc35e1
ENSMUSG00000016757.4	1651.55	-0.14745	0.0800139	-1.84281	0.0653575	0.365562	Ttll12
ENSMUSG00000022000.9	2500.95	0.130492	0.0707929	1.84329	0.0652868	0.365562	Zc3h13
ENSMUSG00000047514.5	1898.3	-0.140673	0.0763895	-1.84152	0.0655451	0.36598	Tspyl1
ENSMUSG00000037351.3	1672.74	-0.147166	0.0800024	-1.83952	0.0658392	0.366309	Actr1b
ENSMUSG00000032966.7	4692.69	-0.111969	0.0608544	-1.83995	0.0657752	0.366309	Fkbp1a
ENSMUSG00000038253.6	628.744	0.210707	0.114524	1.83985	0.0657908	0.366309	Hoxa5
ENSMUSG00000028224.8	696.97	0.20379	0.110747	1.84013	0.0657489	0.366309	Nbn
ENSMUSG00000027387.10	238.833	0.353119	0.191948	1.83966	0.0658178	0.366309	Zc3h8
ENSMUSG00000045639.8	307.273	-0.288108	0.156519	-1.84073	0.0656614	0.366309	Zfp629
ENSMUSG00000024683.4	943.833	-0.18823	0.102353	-1.83903	0.0659113	0.366359	Mrpl16
ENSMUSG00000046792.7	677.785	-0.203765	0.110806	-1.83892	0.0659265	0.366359	Zfp787
ENSMUSG00000020650.7	1694.57	0.188499	0.102575	1.83767	0.0661117	0.366516	Bcap29
ENSMUSG00000043131.8	7966.52	0.11415	0.0621046	1.83803	0.0660575	0.366516	Mob1a
ENSMUSG00000026239.8	1488.9	-0.157452	0.085667	-1.83795	0.0660695	0.366516	Pde6d
ENSMUSG00000048379.7	1035.62	0.201787	0.109791	1.83792	0.0660735	0.366516	Socs4
ENSMUSG00000029456.6	284.037	0.299469	0.163011	1.83711	0.0661941	0.366755	Acad10
ENSMUSG00000049550.10	2716.02	0.13202	0.0718909	1.8364	0.0662991	0.36712	Clip1
ENSMUSG00000002881.8	2030.1	0.157982	0.0860946	1.83498	0.0665084	0.367625	Nab1
ENSMUSG00000031939.8	1260.49	0.181288	0.0987834	1.83521	0.0664744	0.367625	Taf1d
ENSMUSG00000038379.8	739.809	0.222235	0.121093	1.83524	0.0664705	0.367625	Ttk
ENSMUSG00000020888.10	977.746	-0.186719	0.101782	-1.8345	0.0665791	0.367677	Dvl2
ENSMUSG00000079547.2	1373.27	-0.155542	0.0848045	-1.83412	0.0666358	0.367677	H2-DMb1
ENSMUSG00000028256.9	309.336	0.298745	0.162867	1.83429	0.0666113	0.367677	Odf2l
ENSMUSG00000064289.9	1214.87	0.171391	0.0934981	1.8331	0.0667882	0.368301	Tank
ENSMUSG00000038774.8	972.664	0.201213	0.109896	1.83094	0.0671097	0.368734	Ascc3
ENSMUSG00000020687.7	1312.18	0.164334	0.0897651	1.83072	0.067143	0.368734	Cdc27
ENSMUSG00000029389.10	607.689	0.234412	0.128016	1.83112	0.0670829	0.368734	Ddx55
ENSMUSG00000022136.7	3537.88	0.138142	0.0754423	1.8311	0.0670858	0.368734	Dnajc3
ENSMUSG00000025793.8	1981.94	-0.147624	0.0806234	-1.83103	0.0670957	0.368734	Hgs
ENSMUSG00000039844.12	4633.32	-0.120903	0.0660357	-1.83087	0.0671202	0.368734	Rapgef1
ENSMUSG00000071253.2	625.452	0.214747	0.117213	1.83211	0.0669357	0.368734	Slc25a16
ENSMUSG00000031918.9	1585.58	0.147964	0.0808612	1.82985	0.0672724	0.369011	Mtmr2
ENSMUSG00000029594.8	1210.52	-0.175943	0.0961436	-1.83001	0.067249	0.369011	Rbm19
ENSMUSG00000020477.4	760.611	-0.195186	0.106712	-1.82908	0.0673879	0.369428	Mrps24
ENSMUSG00000024070.9	2024.06	0.145839	0.0797685	1.82827	0.0675089	0.369874	Prkd3
ENSMUSG00000021557.7	1429.93	0.153245	0.0838868	1.82681	0.0677281	0.370798	Agtpbp1
ENSMUSG00000038502.9	1166.77	-0.164629	0.0901535	-1.82609	0.0678362	0.370798	Ptov1
ENSMUSG00000069539.5	1207.05	0.173602	0.095058	1.82627	0.067809	0.370798	Scyl2
ENSMUSG00000036810.9	669.163	0.207073	0.113389	1.82622	0.0678167	0.370798	Tmem188
ENSMUSG00000020064.7	1639.5	0.145787	0.0799272	1.824	0.0681524	0.371669	Herc4
ENSMUSG00000032667.10	1119.38	-0.183035	0.100343	-1.82409	0.0681385	0.371669	Pon2
ENSMUSG00000030793.3	1618.04	-0.15345	0.0841288	-1.82398	0.0681546	0.371669	Pycard
ENSMUSG00000062083.1	941.471	-0.183804	0.100744	-1.82447	0.0680805	0.371669	Rpl13a-ps1
ENSMUSG00000044424.3	2521.86	-0.14124	0.077464	-1.8233	0.0682579	0.371711	Gm9493
ENSMUSG00000025959.6	602.7	0.213904	0.117344	1.82288	0.0683213	0.371711	Klf7
ENSMUSG00000002222.8	2233.72	0.136544	0.0748869	1.82334	0.068252	0.371711	Rmnd5a
ENSMUSG00000021188.6	851.763	0.227552	0.124816	1.8231	0.0682878	0.371711	Trip11
ENSMUSG00000020315.11	10640	0.097527	0.0535585	1.82094	0.0686153	0.373093	Spnb2
ENSMUSG00000032218.6	3687	-0.117553	0.0646076	-1.81949	0.0688366	0.374079	Ccnb2
ENSMUSG00000048234.8	1028.63	0.173656	0.0954829	1.81872	0.0689546	0.374503	Rnf149
ENSMUSG00000029014.8	2071.36	0.162787	0.0895296	1.81825	0.0690265	0.374675	Dnajc2
ENSMUSG00000026083.7	3600.84	0.289391	0.159196	1.81783	0.0690905	0.374805	Eif5b
ENSMUSG00000024772.8	2432.18	-0.12986	0.0714621	-1.81718	0.0691889	0.374904	Ehd1
ENSMUSG00000024613.8	4952.54	-0.127933	0.0703988	-1.81725	0.0691781	0.374904	Tcof1
ENSMUSG00000047423.8	990.498	-0.176849	0.0973524	-1.81659	0.0692803	0.375181	AI837181
ENSMUSG00000028127.5	1030.66	0.173688	0.0956418	1.81603	0.0693665	0.37543	Abcd3
ENSMUSG00000024959.7	1113.24	-0.171184	0.0942889	-1.81553	0.0694427	0.375619	Bad
ENSMUSG00000063406.5	2476.44	0.16809	0.0925974	1.81527	0.0694817	0.375619	Tmed5
ENSMUSG00000040359.8	1040.16	0.171733	0.0947245	1.81298	0.0698353	0.377313	1810074P20Rik
ENSMUSG00000029387.4	358.424	-0.267591	0.14772	-1.81147	0.0700675	0.377979	Gtf2h3
ENSMUSG00000032288.8	1366.19	-0.15502	0.0855687	-1.81165	0.0700404	0.377979	Imp3
ENSMUSG00000037646.8	3468.95	0.128491	0.0709351	1.81139	0.07008	0.377979	Vps13b
ENSMUSG00000039988.7	910.177	0.188273	0.104005	1.81023	0.0702601	0.378453	Ankrd13c
ENSMUSG00000021250.7	426.211	-0.244775	0.135217	-1.81023	0.0702594	0.378453	Fos
ENSMUSG00000054723.5	259.163	-0.310177	0.171365	-1.81004	0.0702894	0.378453	Vmac
ENSMUSG00000006678.5	1755.81	0.165849	0.0916584	1.80942	0.070385	0.37875	Pola1
ENSMUSG00000029752.6	4320.61	-0.113402	0.0627498	-1.80721	0.0707298	0.379354	Asns
ENSMUSG00000029163.6	8224.21	-0.106827	0.0590913	-1.80784	0.070632	0.379354	Emilin1
ENSMUSG00000020308.5	378.766	-0.260439	0.14406	-1.80785	0.0706304	0.379354	Gm16517
ENSMUSG00000020962.7	1150.95	0.169513	0.0938155	1.80688	0.0707813	0.379354	Gtf2a1
ENSMUSG00000041671.7	288.39	0.29465	0.16294	1.80833	0.0705553	0.379354	Pyroxd1
ENSMUSG00000005262.6	1558.06	0.149209	0.0825448	1.80761	0.0706671	0.379354	Ufd1l
ENSMUSG00000028799.9	1828.11	-0.147105	0.081405	-1.80707	0.0707509	0.379354	Zfp362
ENSMUSG00000036391.9	789.515	0.192322	0.106495	1.80592	0.0709304	0.379717	Sec24a
ENSMUSG00000071074.3	2124.96	-0.150006	0.0830633	-1.80592	0.0709303	0.379717	Yipf3
ENSMUSG00000060657.6	2646.4	0.13061	0.0723431	1.80543	0.0710079	0.379741	4921513D23Rik
ENSMUSG00000006289.8	1198.23	-0.163632	0.0906359	-1.80537	0.0710161	0.379741	Osgep
ENSMUSG00000008763.8	1605.92	0.16197	0.0897401	1.80488	0.0710938	0.379939	Man1a2
ENSMUSG00000040446.3	643.221	0.211745	0.117337	1.80459	0.0711393	0.379965	Rprd1a
ENSMUSG00000035268.8	843.3	-0.184538	0.102283	-1.80419	0.0712021	0.380083	Pkig
ENSMUSG00000039285.6	1352.81	0.160437	0.088966	1.80335	0.0713328	0.380388	Azi2
ENSMUSG00000030035.8	771.633	-0.192365	0.106673	-1.8033	0.0713405	0.380388	Wbp1
ENSMUSG00000028936.9	8598.51	-0.110016	0.0610658	-1.8016	0.0716088	0.3816	Rpl22
ENSMUSG00000074247.4	1855.02	-0.14081	0.0782137	-1.80033	0.0718092	0.382003	Dda1
ENSMUSG00000055850.6	1168.86	-0.164663	0.0914684	-1.80022	0.0718263	0.382003	Rnf181
ENSMUSG00000059552.6	4767.21	-0.120952	0.0671927	-1.80008	0.0718477	0.382003	Trp53
ENSMUSG00000024312.9	2062.98	-0.135904	0.0754787	-1.80056	0.071772	0.382003	Wdr46
ENSMUSG00000037949.6	979.715	-0.17337	0.0963685	-1.79904	0.072013	0.382664	Ano10
ENSMUSG00000060063.5	3908.45	-0.117006	0.0650717	-1.79811	0.0721601	0.38301	Alox5ap
ENSMUSG00000041995.7	827.473	-0.191887	0.106712	-1.79817	0.0721497	0.38301	Zbed3
ENSMUSG00000031985.3	4540.06	-0.110484	0.0614611	-1.79763	0.0722357	0.383194	Gnpat
ENSMUSG00000030254.9	1906.62	0.137401	0.0764851	1.79645	0.0724236	0.383972	Rad18
ENSMUSG00000030654.7	9095.84	-0.100655	0.0560386	-1.79617	0.0724668	0.383984	Arl6ip1
ENSMUSG00000031201.10	753.943	0.193231	0.107635	1.79524	0.0726148	0.38455	Brcc3
ENSMUSG00000044881.6	372.234	-0.267913	0.149332	-1.79407	0.0728018	0.385322	Chchd8
ENSMUSG00000034311.3	1273.54	0.165808	0.0924857	1.7928	0.0730048	0.386178	Kif4
ENSMUSG00000014769.9	4978.21	-0.108927	0.0607789	-1.79219	0.0731028	0.386477	Psmb1
ENSMUSG00000026740.6	1333.92	0.153435	0.0856272	1.79189	0.0731499	0.386508	Dnajc1
ENSMUSG00000035125.4	308.153	0.296578	0.165561	1.79135	0.0732367	0.38664	AW146020
ENSMUSG00000040430.11	681.498	0.200579	0.111979	1.79122	0.0732577	0.38664	Pitpnc1
ENSMUSG00000078812.4	33949.3	-0.0893273	0.049885	-1.79067	0.0733469	0.386893	Eif5a
ENSMUSG00000005142.9	21963.8	-0.0921213	0.0515125	-1.78833	0.0737229	0.388038	Man2b1
ENSMUSG00000014551.8	876.688	-0.185936	0.10399	-1.78803	0.0737717	0.388038	Mrps25
ENSMUSG00000026260.6	2320.64	-0.133159	0.0744558	-1.78843	0.0737068	0.388038	Ndufa10
ENSMUSG00000031823.7	1127.08	-0.162996	0.0911589	-1.78804	0.0737699	0.388038	Zdhhc7
ENSMUSG00000017421.10	5786.07	0.108035	0.0604075	1.78844	0.0737055	0.388038	Zfp207
ENSMUSG00000036333.9	4210.55	0.111313	0.0622686	1.78762	0.0738366	0.388161	Kidins220
ENSMUSG00000073155.6	1572.8	-0.149681	0.0838928	-1.7842	0.0743916	0.389606	1810058I24Rik
ENSMUSG00000044496.6	3517.94	-0.125676	0.0704492	-1.78392	0.074437	0.389606	2510039O18Rik
ENSMUSG00000038690.9	2476.58	-0.133572	0.0748776	-1.78387	0.074445	0.389606	Atp5j2
ENSMUSG00000028656.8	16560.3	-0.0946099	0.0529965	-1.78521	0.0742271	0.389606	Cap1
ENSMUSG00000031303.8	382.996	0.264842	0.148336	1.78542	0.0741924	0.389606	Map3k15
ENSMUSG00000021374.8	4436.87	0.115534	0.0647526	1.78423	0.0743862	0.389606	Nup153
ENSMUSG00000059409.7	2991.11	-0.125499	0.0703106	-1.78492	0.0742744	0.389606	Ppp2r5d
ENSMUSG00000056211.6	1926.25	0.139577	0.0782287	1.78422	0.0743882	0.389606	R3hdm1
ENSMUSG00000027091.8	1639.28	0.14701	0.0824393	1.78326	0.0745445	0.389909	Zc3h15
ENSMUSG00000038930.5	338.294	0.275297	0.154569	1.78106	0.0749028	0.391564	Rccd1
ENSMUSG00000004880.6	12281.6	0.0957645	0.0538034	1.7799	0.075093	0.392339	Lbr
ENSMUSG00000038736.8	775.313	0.19449	0.10929	1.77957	0.0751457	0.392395	Nudcd1
ENSMUSG00000019055.8	2001.61	-0.136945	0.0769729	-1.77913	0.0752178	0.392552	Plod1
ENSMUSG00000031930.9	3747.52	-0.117114	0.065842	-1.77871	0.0752875	0.392697	Wwp2
ENSMUSG00000020654.9	1743.53	-0.142001	0.0798694	-1.77791	0.0754183	0.392943	Adcy3
ENSMUSG00000032113.8	666.798	0.199409	0.112159	1.77791	0.0754188	0.392943	Chek1
ENSMUSG00000045165.5	1343.07	-0.156995	0.0884074	-1.77582	0.0757632	0.394163	AI467606
ENSMUSG00000025868.6	1156.98	-0.16671	0.0938604	-1.77615	0.0757083	0.394163	Higd2a
ENSMUSG00000027566.8	4697.81	-0.116515	0.0656159	-1.77572	0.0757795	0.394163	Psma7
ENSMUSG00000023020.2	669.2	-0.200611	0.113066	-1.77428	0.0760163	0.394955	2310016M24Rik
ENSMUSG00000037017.9	391.145	-0.261228	0.147227	-1.77432	0.0760107	0.394955	Zscan21
ENSMUSG00000001794.6	7629.57	-0.101798	0.0574091	-1.77321	0.076194	0.395659	Capns1
ENSMUSG00000021327.11	1236.51	0.158226	0.0892481	1.77288	0.076249	0.395724	Zkscan3
ENSMUSG00000034371.7	851.943	-0.184525	0.104158	-1.77158	0.0764641	0.396226	Dak
ENSMUSG00000008976.9	2291.91	0.155708	0.0879071	1.77128	0.0765137	0.396226	Gabpa
ENSMUSG00000015053.8	5133.15	-0.117339	0.0662644	-1.77076	0.0765999	0.396226	Gata2
ENSMUSG00000063077.7	2668.9	0.123456	0.0697165	1.77083	0.0765896	0.396226	Kif1b
ENSMUSG00000036067.6	2066.09	-0.13976	0.0789176	-1.77096	0.0765667	0.396226	Slc2a6
ENSMUSG00000027263.6	1426.69	0.148447	0.0838087	1.77126	0.0765181	0.396226	Tubgcp4
ENSMUSG00000039771.7	1071.32	-0.166753	0.0942115	-1.76998	0.0767301	0.396679	Polr2j
ENSMUSG00000019370.10	9182.65	-0.0992593	0.0560914	-1.7696	0.0767938	0.396789	Calm3
ENSMUSG00000026922.7	818.292	-0.181649	0.102674	-1.76918	0.0768635	0.396869	Agpat2
ENSMUSG00000071715.5	4073.23	0.129053	0.0729526	1.769	0.0768941	0.396869	Ncf4
ENSMUSG00000061306.8	7761.4	-0.10085	0.057035	-1.76822	0.0770247	0.397323	Slc38a10
ENSMUSG00000026288.8	9678.37	-0.10098	0.0571415	-1.76719	0.0771959	0.397987	Inpp5d
ENSMUSG00000064284.6	365.447	-0.260289	0.14734	-1.76659	0.077297	0.398288	2210021J22Rik
ENSMUSG00000027673.6	1770.68	-0.138562	0.0784494	-1.76627	0.0773512	0.398348	Ndufb5
ENSMUSG00000019518.4	1330.37	0.166919	0.0945259	1.76585	0.0774202	0.398484	Ap4m1
ENSMUSG00000025362.5	7295.59	-0.113368	0.0642121	-1.76552	0.0774757	0.39855	Rps26
ENSMUSG00000025041.9	2376.59	-0.128657	0.0729273	-1.76418	0.0777015	0.399492	Nt5c2
ENSMUSG00000020537.3	1366.65	-0.150292	0.0852583	-1.76278	0.0779372	0.399609	Drg2
ENSMUSG00000037174.9	2060.79	0.13225	0.0750453	1.76227	0.0780237	0.399609	Elf2
ENSMUSG00000037740.8	1417.46	-0.158929	0.0901319	-1.76329	0.0778516	0.399609	Mrps26
ENSMUSG00000026565.9	882.731	0.180353	0.102333	1.76241	0.0780006	0.399609	Pou2f1
ENSMUSG00000025816.8	367.381	0.261234	0.148164	1.76314	0.0778767	0.399609	Sec61a2
ENSMUSG00000006058.4	1325.88	-0.152218	0.0863557	-1.76268	0.0779538	0.399609	Snf8
ENSMUSG00000045098.10	1648.04	0.143758	0.0815298	1.76326	0.0778565	0.399609	Suv420h1
ENSMUSG00000031229.9	3085.86	0.138118	0.078424	1.76117	0.0782097	0.400124	Atrx
ENSMUSG00000050213.6	1095.59	-0.162704	0.0923802	-1.76125	0.0781964	0.400124	Snip1
ENSMUSG00000020198.7	4250.12	-0.109628	0.0622651	-1.76066	0.0782954	0.400343	Ap3d1
ENSMUSG00000013833.8	2319.43	-0.131357	0.074659	-1.75942	0.0785054	0.400591	Med16
ENSMUSG00000005774.5	1058.72	-0.167667	0.0952874	-1.7596	0.0784761	0.400591	Rfx5
ENSMUSG00000060377.3	448.43	-0.255044	0.144963	-1.75937	0.0785153	0.400591	Rpl36a-ps1
ENSMUSG00000059981.5	3106.17	0.13073	0.0742789	1.75999	0.0784096	0.400591	Taok2
ENSMUSG00000011831.9	321.176	0.310064	0.176412	1.75761	0.0788136	0.400811	Evi5
ENSMUSG00000047648.7	423.576	0.244398	0.139052	1.7576	0.0788157	0.400811	Fbxo30
ENSMUSG00000058715.6	6553.78	-0.101389	0.0576701	-1.75809	0.0787326	0.400811	Fcer1g
ENSMUSG00000029066.5	1375.94	-0.150726	0.0857172	-1.75841	0.0786776	0.400811	Mrpl20
ENSMUSG00000051695.5	13197.7	-0.0935362	0.0532133	-1.75776	0.0787886	0.400811	Pcbp1
ENSMUSG00000024737.2	252.912	0.301561	0.17155	1.75787	0.0787702	0.400811	Slc15a3
ENSMUSG00000025584.10	1602.82	0.144352	0.0821471	1.75724	0.0788771	0.400905	Pde8a
ENSMUSG00000035151.5	650.65	0.220131	0.125298	1.75686	0.0789419	0.401017	Elmod2
ENSMUSG00000039952.9	1131.06	-0.159413	0.0908408	-1.75486	0.0792831	0.402184	Dag1
ENSMUSG00000083097.2	1694.34	-0.145068	0.0826714	-1.75476	0.0793008	0.402184	Gm14494
ENSMUSG00000024077.9	1720.29	0.144106	0.0821007	1.75524	0.0792186	0.402184	Strn
ENSMUSG00000038803.5	1760.16	-0.148416	0.0846157	-1.754	0.0794304	0.402622	Ost4
ENSMUSG00000022018.6	464.327	0.228645	0.130431	1.753	0.0796024	0.403135	1190002H23Rik
ENSMUSG00000024052.10	687.159	0.198929	0.113486	1.75289	0.0796205	0.403135	Lpin2
ENSMUSG00000001441.7	2690.69	0.132999	0.0758922	1.75248	0.0796917	0.403135	Npepps
ENSMUSG00000031066.4	1079.61	0.175694	0.100259	1.75241	0.079704	0.403135	Usp11
ENSMUSG00000072893.6	215.823	0.324086	0.185168	1.75022	0.0800798	0.403565	4933439C10Rik
ENSMUSG00000023845.6	2633.07	0.138158	0.078924	1.75053	0.0800277	0.403565	Lnpep
ENSMUSG00000039263.10	2716.82	-0.128248	0.0732781	-1.75016	0.0800912	0.403565	Npepl1
ENSMUSG00000037997.6	519.893	0.222745	0.127205	1.75107	0.0799337	0.403565	Parp11
ENSMUSG00000057236.9	12810.5	-0.0928186	0.0530318	-1.75025	0.0800759	0.403565	Rbbp4
ENSMUSG00000038384.10	1917.41	0.148825	0.0850062	1.75076	0.0799877	0.403565	Setd1b
ENSMUSG00000020265.9	3840.62	-0.112165	0.0640394	-1.75151	0.079859	0.403565	Sumo3
ENSMUSG00000020152.7	13803.1	0.103159	0.0589714	1.74931	0.0802369	0.403603	Actr2
ENSMUSG00000031231.4	2235.86	-0.153748	0.0879254	-1.74861	0.0803578	0.403603	Cox7b
ENSMUSG00000038366.9	9350.59	-0.101318	0.0579019	-1.74982	0.0801489	0.403603	Lasp1
ENSMUSG00000020329.6	984.614	-0.171154	0.0978654	-1.74887	0.0803129	0.403603	Polrmt
ENSMUSG00000041079.5	517.857	-0.223513	0.127818	-1.74868	0.0803457	0.403603	Rwdd2b
ENSMUSG00000066613.7	218.415	0.330677	0.18904	1.74925	0.0802478	0.403603	Zfp932
ENSMUSG00000041297.7	2892.26	0.120187	0.068804	1.7468	0.0806721	0.404096	Cdk13
ENSMUSG00000062929.7	501.68	0.226171	0.129476	1.74682	0.0806693	0.404096	Cfl2
ENSMUSG00000030339.7	2071.46	-0.133486	0.0764137	-1.74689	0.0806569	0.404096	Ltbr
ENSMUSG00000021486.6	4401.12	-0.107874	0.0617549	-1.74681	0.0806702	0.404096	Prelid1
ENSMUSG00000048677.7	608.264	0.205351	0.11751	1.74751	0.0805488	0.404096	Tpcn2
ENSMUSG00000001783.3	3776.32	-0.11195	0.0642156	-1.74334	0.0812744	0.406677	D10Wsu52e
ENSMUSG00000001855.8	5364.43	-0.112194	0.0643482	-1.74355	0.0812383	0.406677	Nup214
ENSMUSG00000027628.4	763.826	-0.190609	0.109355	-1.74302	0.0813294	0.406734	0610011L14Rik
ENSMUSG00000070493.3	3101.27	-0.116488	0.0668871	-1.74156	0.0815863	0.406991	Chchd2
ENSMUSG00000029478.9	3601.64	-0.121877	0.069954	-1.74225	0.0814655	0.406991	Ncor2
ENSMUSG00000025982.7	11716.5	0.106042	0.0608917	1.74149	0.0815985	0.406991	Sf3b1
ENSMUSG00000021266.10	2762.63	-0.122532	0.0703458	-1.74186	0.0815337	0.406991	Wars
ENSMUSG00000022401.5	541.405	0.214717	0.123246	1.74219	0.081476	0.406991	Xpnpep3
ENSMUSG00000031691.7	2998.04	-0.129464	0.0743603	-1.74104	0.0816769	0.407165	Tnpo2
ENSMUSG00000011306.6	1264.28	-0.15208	0.0873673	-1.7407	0.0817363	0.407244	Sugp1
ENSMUSG00000059456.6	5711.68	-0.106185	0.0610446	-1.73946	0.0819531	0.407717	Ptk2b
ENSMUSG00000022019.8	400.645	0.250547	0.144041	1.73941	0.0819621	0.407717	Tdrd3
ENSMUSG00000036752.4	11654.5	-0.0970464	0.0557769	-1.7399	0.081876	0.407717	Tubb2c
ENSMUSG00000029198.3	1595.41	-0.140408	0.0807659	-1.73845	0.0821311	0.408239	Grpel1
ENSMUSG00000024927.6	2885.87	-0.120536	0.0693404	-1.73832	0.0821544	0.408239	Rela
ENSMUSG00000034663.7	972.2	0.178444	0.102682	1.73784	0.0822389	0.408441	Bmp2k
ENSMUSG00000037960.9	1116.63	-0.167753	0.0965752	-1.73702	0.0823844	0.408774	1110007C09Rik
ENSMUSG00000020883.11	2173.44	0.128449	0.0739611	1.73672	0.082437	0.408774	Fbxl20
ENSMUSG00000020184.8	3326.98	0.113592	0.0654007	1.73686	0.0824124	0.408774	Mdm2
ENSMUSG00000019132.4	16574	0.0931973	0.0536914	1.73579	0.0826003	0.408862	BC005537
ENSMUSG00000059474.6	1413.53	0.1604	0.0924039	1.73586	0.0825887	0.408862	Mbtd1
ENSMUSG00000079442.5	1226.22	-0.164918	0.095019	-1.73563	0.0826297	0.408862	St6galnac4
ENSMUSG00000031723.1	444.285	-0.231789	0.133507	-1.73615	0.0825375	0.408862	Txnl4b
ENSMUSG00000029465.8	6958.67	-0.102795	0.0592692	-1.73437	0.0828518	0.409311	Arpc3
ENSMUSG00000015214.7	1840.82	0.137162	0.0790837	1.73439	0.0828489	0.409311	Mtmr1
ENSMUSG00000050029.7	1819.31	0.166344	0.0958865	1.7348	0.0827764	0.409311	Rap2c
ENSMUSG00000068966.4	1442.72	0.160657	0.0926695	1.73366	0.0829788	0.409721	Zbtb34
ENSMUSG00000002885.8	5253.44	-0.109039	0.0629754	-1.73146	0.0833703	0.410275	Cd97
ENSMUSG00000013155.9	637.207	-0.207853	0.119968	-1.73257	0.083173	0.410275	E130303B06Rik
ENSMUSG00000057177.6	3647.2	-0.113969	0.0658287	-1.7313	0.0833981	0.410275	Gsk3a
ENSMUSG00000036111.7	273.662	-0.285727	0.164986	-1.73183	0.0833039	0.410275	Lmo1
ENSMUSG00000021910.8	6841.15	0.126519	0.0730301	1.73243	0.0831973	0.410275	Nisch
ENSMUSG00000028957.6	209.321	0.333723	0.192712	1.73172	0.0833238	0.410275	Per3
ENSMUSG00000034075.9	4112.77	-0.112107	0.0647254	-1.73203	0.0832674	0.410275	Zdhhc5
ENSMUSG00000028383.10	650.723	0.199333	0.115195	1.7304	0.0835588	0.410722	Hsdl2
ENSMUSG00000049577.7	536.537	-0.212786	0.122977	-1.7303	0.0835769	0.410722	Zfpm1
ENSMUSG00000031378.7	3483.71	-0.125843	0.0727578	-1.72962	0.0836982	0.411102	Abcd1
ENSMUSG00000030287.8	716.533	0.188213	0.108895	1.72839	0.0839189	0.41197	Itpr2
ENSMUSG00000051378.10	1652.86	-0.14697	0.0850609	-1.72782	0.0840211	0.412255	Kif18b
ENSMUSG00000047126.10	11826.1	0.101453	0.0587458	1.72698	0.0841721	0.412779	Cltc
ENSMUSG00000039810.5	595.202	-0.205472	0.118996	-1.72672	0.0842188	0.412791	Zc3h10
ENSMUSG00000037361.7	1739.56	-0.149702	0.0867425	-1.72583	0.0843787	0.413142	0610009D07Rik
ENSMUSG00000035539.6	226.81	-0.316591	0.183439	-1.72586	0.084372	0.413142	E230008N13Rik
ENSMUSG00000037235.7	3180.9	-0.116284	0.0674105	-1.72501	0.0845255	0.413644	Mxd4
ENSMUSG00000009927.8	5764.87	-0.119712	0.069454	-1.72362	0.0847763	0.414654	Rps25
ENSMUSG00000027082.8	785.316	0.192542	0.11178	1.72251	0.0849775	0.415236	Tfpi
ENSMUSG00000063108.7	706.057	0.194828	0.11311	1.72247	0.0849842	0.415236	Zfp26
ENSMUSG00000038664.9	4333.99	0.108584	0.0631133	1.72046	0.0853495	0.416611	Herc1
ENSMUSG00000041354.9	3355.12	0.128381	0.0746218	1.72043	0.0853546	0.416611	Rgl2
ENSMUSG00000036281.6	1025.31	0.184846	0.107558	1.71857	0.0856928	0.417827	Snapc4
ENSMUSG00000029553.7	661.826	0.195652	0.113846	1.71857	0.0856931	0.417827	Tcfec
ENSMUSG00000040822.6	1084.57	-0.159255	0.0927964	-1.71618	0.0861289	0.417883	1700123O20Rik
ENSMUSG00000028439.8	215.147	0.320076	0.186718	1.71422	0.0864875	0.417883	2310028H24Rik
ENSMUSG00000041718.9	243.554	0.299023	0.174335	1.71522	0.0863056	0.417883	Alg13
ENSMUSG00000004105.6	828.032	-0.178181	0.103861	-1.71558	0.0862396	0.417883	Angptl2
ENSMUSG00000039219.10	779.083	0.209891	0.122288	1.71636	0.0860959	0.417883	Arid4b
ENSMUSG00000020015.8	4501.19	0.107701	0.0627626	1.71601	0.0861608	0.417883	Cdk17
ENSMUSG00000008153.5	1935.95	-0.139059	0.0809908	-1.71698	0.0859833	0.417883	Clstn3
ENSMUSG00000078789.3	430.316	-0.233919	0.13669	-1.71131	0.0870233	0.417883	Dph1
ENSMUSG00000054889.3	755.453	0.183722	0.107069	1.71592	0.0861762	0.417883	Dsp
ENSMUSG00000027236.8	861.896	0.187112	0.109106	1.71495	0.0863539	0.417883	Eif3j
ENSMUSG00000039599.8	415.322	0.239624	0.1399	1.71282	0.0867449	0.417883	Fam149b
ENSMUSG00000055932.8	2320.07	-0.128339	0.0749813	-1.71161	0.086969	0.417883	Fto
ENSMUSG00000036587.6	806.974	-0.177295	0.103444	-1.71393	0.0865414	0.417883	Fut7
ENSMUSG00000033751.5	969.45	-0.176832	0.103036	-1.71622	0.0861221	0.417883	Gadd45gip1
ENSMUSG00000081895.2	2884.99	-0.131547	0.076892	-1.7108	0.0871182	0.417883	Gm10294
ENSMUSG00000082045.2	257.207	-0.291193	0.170124	-1.71165	0.0869609	0.417883	Gm11585
ENSMUSG00000059195.8	11085.4	-0.0974475	0.0569093	-1.71233	0.0868358	0.417883	Gm12715
ENSMUSG00000027615.7	1844.95	0.136215	0.0795056	1.71328	0.0866617	0.417883	Hps3
ENSMUSG00000057440.6	275.047	0.292454	0.170497	1.7153	0.0862902	0.417883	Mpp7
ENSMUSG00000023723.10	1551.23	-0.143561	0.0838335	-1.71246	0.0868121	0.417883	Mrps23
ENSMUSG00000052214.8	1705.71	-0.135786	0.0793743	-1.71071	0.0871353	0.417883	Opa3
ENSMUSG00000038976.6	4973.62	-0.105464	0.0614004	-1.71764	0.0858621	0.417883	Ppp1r9b
ENSMUSG00000026064.8	583.196	0.20621	0.120436	1.7122	0.0868602	0.417883	Ptp4a1
ENSMUSG00000022075.5	953.209	-0.166223	0.096945	-1.71461	0.0864165	0.417883	Rhobtb2
ENSMUSG00000036202.8	2073.96	0.297427	0.173564	1.71365	0.0865934	0.417883	Rif1
ENSMUSG00000028524.12	1588.21	0.14632	0.0851591	1.7182	0.0857601	0.417883	Sgip1
ENSMUSG00000027130.8	5467.42	0.106755	0.0623028	1.71348	0.0866238	0.417883	Slc12a6
ENSMUSG00000026425.8	1161.94	0.155239	0.0904448	1.7164	0.0860889	0.417883	Srgap2
ENSMUSG00000030805.8	1388.85	0.145469	0.0849712	1.71199	0.0868993	0.417883	Stx4a
ENSMUSG00000048707.8	771.58	-0.181394	0.106027	-1.71083	0.0871118	0.417883	Tprn
ENSMUSG00000042675.9	881.957	-0.175376	0.102424	-1.71226	0.0868489	0.417883	Ypel3
ENSMUSG00000042197.7	1221.58	0.154312	0.0900682	1.71328	0.0866611	0.417883	Zfp451
ENSMUSG00000033543.10	1303.14	0.148252	0.0866817	1.71031	0.0872093	0.418023	Gtf2a2
ENSMUSG00000015950.6	18732.2	-0.0883683	0.051705	-1.70908	0.0874353	0.418892	Ncf1
ENSMUSG00000039824.3	505.316	-0.230496	0.134889	-1.70877	0.0874929	0.418897	Myl6b
ENSMUSG00000021392.7	732.897	0.220095	0.128835	1.70835	0.0875709	0.418897	Nol8
ENSMUSG00000023795.9	247.427	0.312784	0.183089	1.70837	0.0875674	0.418897	Pisd-ps2
ENSMUSG00000029322.6	27321.4	-0.09199	0.0538675	-1.70771	0.0876903	0.419254	Plac8
ENSMUSG00000012535.8	2892.41	0.116438	0.0682088	1.70709	0.0878054	0.41959	Tnpo3
ENSMUSG00000015944.8	752.138	-0.183387	0.107456	-1.70663	0.0878906	0.419721	Gatsl2
ENSMUSG00000037649.9	1606.75	-0.137131	0.0803716	-1.70622	0.0879675	0.419721	H2-DMa
ENSMUSG00000037885.11	753.263	0.184437	0.108087	1.70637	0.0879387	0.419721	Stk35
ENSMUSG00000059439.8	743.445	-0.181912	0.106748	-1.70412	0.0883579	0.421368	Bcas3
ENSMUSG00000031697.5	1372.85	0.148606	0.0872243	1.70372	0.0884326	0.421509	Orc6
ENSMUSG00000022387.9	3501.39	0.110042	0.0646216	1.70286	0.0885939	0.421633	Brd1
ENSMUSG00000061436.8	1464.79	0.144233	0.0846998	1.70287	0.0885928	0.421633	Hipk2
ENSMUSG00000040022.8	296.847	0.273322	0.160475	1.70321	0.0885286	0.421633	Rab11fip2
ENSMUSG00000022234.8	10823	-0.0927235	0.0544714	-1.70224	0.0887101	0.421926	Cct5
ENSMUSG00000062585.5	707.479	-0.186278	0.109443	-1.70205	0.0887458	0.421926	Cnr2
ENSMUSG00000047804.8	2338.31	0.123299	0.0724717	1.70134	0.08888	0.422135	Akap10
ENSMUSG00000055720.8	1224.8	-0.155791	0.0915678	-1.70137	0.0888735	0.422135	Ubl7
ENSMUSG00000053332.7	2806.74	0.120128	0.070627	1.70088	0.0889654	0.422326	Gas5
ENSMUSG00000020929.8	5865.39	-0.101765	0.0598414	-1.70058	0.0890214	0.422377	Eftud2
ENSMUSG00000063810.5	552.679	0.21229	0.124908	1.69958	0.0892102	0.423058	Alms1
ENSMUSG00000031700.5	775.628	-0.180228	0.106089	-1.69883	0.0893505	0.42341	Gpt2
ENSMUSG00000053470.6	1389.34	0.153046	0.0900958	1.6987	0.089375	0.42341	Kdm3a
ENSMUSG00000006740.7	4223.44	0.264531	0.15584	1.69745	0.0896121	0.424104	Kif5b
ENSMUSG00000032596.7	2698.37	0.131017	0.0771752	1.69765	0.0895737	0.424104	Uba7
ENSMUSG00000035202.7	886.207	-0.178026	0.104895	-1.69718	0.0896632	0.424112	Lars2
ENSMUSG00000024817.7	1985.08	0.127729	0.0752697	1.69696	0.0897046	0.424112	Uhrf2
ENSMUSG00000041598.7	581.092	-0.201829	0.119028	-1.69564	0.0899533	0.425073	Cdc42ep4
ENSMUSG00000008140.10	3759.59	-0.119743	0.0706889	-1.69394	0.0902765	0.426384	2310044H10Rik
ENSMUSG00000068917.6	1702.15	0.146822	0.0867523	1.69243	0.0905643	0.427256	Clk2
ENSMUSG00000026254.10	2482	-0.123844	0.0731902	-1.69209	0.0906288	0.427256	Eif4e2
ENSMUSG00000046380.2	230.868	-0.303065	0.179075	-1.6924	0.0905704	0.427256	Jrk
ENSMUSG00000036779.6	1885.52	0.141305	0.0835129	1.69201	0.090644	0.427256	Papd5
ENSMUSG00000039656.9	3616.26	-0.120737	0.0713676	-1.69177	0.0906906	0.427261	Rxrb
ENSMUSG00000067873.5	1097.47	0.157466	0.0931132	1.69112	0.0908134	0.427408	Htatsf1
ENSMUSG00000024908.8	5302.31	0.105787	0.0625465	1.69133	0.0907742	0.427408	Ppp6r3
ENSMUSG00000026553.10	11931.7	-0.0916735	0.0543137	-1.68785	0.0914399	0.42815	Copa
ENSMUSG00000090610.1	2158.86	-0.12588	0.0746331	-1.68665	0.0916705	0.42815	Gm3571
ENSMUSG00000083626.1	529.808	-0.214474	0.126962	-1.68928	0.0911664	0.42815	Gm4459
ENSMUSG00000032777.7	4528.9	-0.104697	0.0620452	-1.68743	0.0915203	0.42815	Gtf3c1
ENSMUSG00000016194.8	282.775	0.278236	0.164956	1.68673	0.0916555	0.42815	Hsd11b1
ENSMUSG00000046245.6	2224.24	0.125892	0.0745535	1.68862	0.0912927	0.42815	Pilra
ENSMUSG00000026991.11	219.273	0.330423	0.195656	1.6888	0.0912583	0.42815	Pkp4
ENSMUSG00000018286.6	2634.91	-0.117046	0.0693631	-1.68744	0.0915197	0.42815	Psmb6
ENSMUSG00000022216.10	3684.64	-0.1104	0.0653278	-1.68993	0.0910408	0.42815	Psme1
ENSMUSG00000062456.2	2649.18	-0.125343	0.0743253	-1.68642	0.0917156	0.42815	Rpl9-ps6
ENSMUSG00000022437.6	3981.39	-0.107638	0.063832	-1.68626	0.0917449	0.42815	Samm50
ENSMUSG00000041355.8	3765.56	-0.10902	0.0646456	-1.68643	0.0917126	0.42815	Ssr2
[truncated: 11,523 more rows]
