# Supplementary material for: In Vivo Screening Unveils Pervasive RNA-Binding Protein Dependencies in Leukemic Stem Cells and Identifies ELAVL1 as a Therapeutic Target
Source: Oxford University Press journal article supplement (doi:10.1158/2643-3230.bcd-22-0086), 2023-02-09
Supplement: bcd-22-0086_supplementary_table_s9_suppst9.xlsx [file bcd-22-0086_supplementary_table_s9_suppst9.xlsx]

## Sheet: RNA-seq huAML
Supplemental Table S9a: Differentially expressed transcripts upon ELAVL1 knock down in primary AML
gene_id	symbol	baseMean	log2FoldChange	lfcSE	stat	pvalue	padj
ENSG00000115541	HSPE1	953.343	-1.57686	0.127002	-12.416	2.13866e-35	2.838e-31
ENSG00000143401	ANP32E	2308.97	-1.24734	0.118602	-10.517	7.21095e-26	4.78446e-22
ENSG00000147649	MTDH	5303.29	-1.17902	0.114352	-10.3105	6.3195e-25	2.79533e-21
ENSG00000172667	ZMAT3	844.295	-1.20872	0.118942	-10.1622	2.92378e-24	9.69963e-21
ENSG00000097021	ACOT7	1693.26	-1.07849	0.10944	-9.85467	6.54307e-23	1.73653e-19
ENSG00000154640	BTG3	238.944	-1.70057	0.173275	-9.81429	9.7724e-23	2.16133e-19
ENSG00000163001	CFAP36	345.853	-1.30376	0.139262	-9.36189	7.83255e-21	1.48483e-17
ENSG00000153574	RPIA	780.772	-1.4132	0.15406	-9.17303	4.59912e-20	7.62878e-17
ENSG00000066044	ELAVL1	2150.72	-1.11905	0.126042	-8.87839	6.78327e-19	1.00015e-15
ENSG00000025772	TOMM34	1027.51	-0.981214	0.118175	-8.30307	1.01458e-16	1.34635e-13
ENSG00000150093	ITGB1	1385.33	-1.20191	0.145705	-8.2489	1.5986e-16	1.9285e-13
ENSG00000102096	PIM2	455.269	-1.09124	0.132735	-8.22123	2.01429e-16	2.22747e-13
ENSG00000133393	FOPNL	910.537	-0.945328	0.116859	-8.08949	5.99153e-16	6.11597e-13
ENSG00000110092	CCND1	149.084	-1.49308	0.188605	-7.91644	2.44399e-15	2.31655e-12
ENSG00000143815	LBR	1078.45	-0.897945	0.114571	-7.83743	4.59848e-15	4.06812e-12
ENSG00000105677	TMEM147	1632.36	-0.846314	0.112632	-7.51396	5.73636e-14	4.7576e-11
ENSG00000149485	FADS1	2915.88	-0.833128	0.111263	-7.4879	6.99823e-14	5.46273e-11
ENSG00000132819	RBM38	687.689	-1.05078	0.143273	-7.33414	2.23151e-13	1.64512e-10
ENSG00000126768	TIMM17B	1150.05	-0.919595	0.1269	-7.24662	4.27303e-13	2.98437e-10
ENSG00000174749	C4orf32	322.378	-1.04898	0.147387	-7.11717	1.10166e-12	7.30949e-10
ENSG00000181790	ADGRB1	216.683	-1.11076	0.156981	-7.07576	1.48631e-12	9.28914e-10
ENSG00000122873	CISD1	351.3	-0.980319	0.138764	-7.06467	1.61002e-12	9.28914e-10
ENSG00000057252	SOAT1	227.361	-1.17163	0.165779	-7.06739	1.57878e-12	9.28914e-10
ENSG00000151893	CACUL1	505.725	-0.900496	0.12898	-6.98169	2.91654e-12	1.61261e-09
ENSG00000125148	MT2A	172.313	1.3562	0.195499	6.93711	4.00196e-12	2.12424e-09
ENSG00000159399	HK2	494.922	-0.93204	0.134527	-6.9283	4.25937e-12	2.17392e-09
ENSG00000083799	CYLD	652.129	-0.809369	0.117817	-6.86969	6.43425e-12	3.16231e-09
ENSG00000102743	SLC25A15	382.968	-0.984857	0.144892	-6.79717	1.06697e-11	5.05667e-09
ENSG00000159388	BTG2	423.048	0.973823	0.145182	6.70761	1.97838e-11	9.0528e-09
ENSG00000203667	COX20	1054.69	-0.760318	0.114494	-6.6407	3.12207e-11	1.34098e-08
ENSG00000114904	NEK4	302.267	-1.03365	0.155666	-6.6402	3.13266e-11	1.34098e-08
ENSG00000173011	TADA2B	212.414	-1.13214	0.170667	-6.63361	3.27575e-11	1.35841e-08
ENSG00000157554	ERG	255.002	-1.1291	0.170791	-6.61099	3.81748e-11	1.53509e-08
ENSG00000112335	SNX3	1801.27	-0.760592	0.117076	-6.49654	8.21887e-11	3.20778e-08
ENSG00000067533	RRP15	515.658	-0.916173	0.142168	-6.44429	1.1614e-10	4.40336e-08
ENSG00000183323	CCDC125	448.805	-0.863807	0.135511	-6.37445	1.83619e-10	6.76841e-08
ENSG00000129757	CDKN1C	197.951	1.15656	0.182108	6.35096	2.13973e-10	7.67412e-08
ENSG00000196950	SLC39A10	389.874	-0.995702	0.157364	-6.32739	2.4934e-10	8.70721e-08
ENSG00000128059	PPAT	465.907	-0.778222	0.123923	-6.27986	3.38874e-10	1.15304e-07
ENSG00000157557	ETS2	302.788	-0.949253	0.151257	-6.27576	3.47941e-10	1.1543e-07
ENSG00000171793	CTPS1	2371.03	-0.680572	0.108716	-6.26007	3.84814e-10	1.24548e-07
ENSG00000135045	C9orf40	325.214	-0.929873	0.149237	-6.23085	4.63903e-10	1.42747e-07
ENSG00000136521	NDUFB5	1367.21	-0.716276	0.114968	-6.23025	4.65697e-10	1.42747e-07
ENSG00000169189	NSMCE1	1443.07	-0.887996	0.142588	-6.22771	4.73314e-10	1.42747e-07
ENSG00000164347	GFM2	369.166	-1.01844	0.164245	-6.20074	5.61995e-10	1.65726e-07
ENSG00000124783	SSR1	2531.99	-0.665225	0.107843	-6.16848	6.89507e-10	1.98908e-07
ENSG00000174684	B4GAT1	220.128	-1.06446	0.173363	-6.14003	8.25078e-10	2.32953e-07
ENSG00000104904	OAZ1	10807.2	-0.664075	0.108454	-6.1231	9.17716e-10	2.5371e-07
ENSG00000138668	HNRNPD	12216.7	-0.669342	0.109623	-6.10586	1.02251e-09	2.76912e-07
ENSG00000279602	CTD-3014M21.1	53.7155	-1.71129	0.281462	-6.07999	1.20189e-09	3.18982e-07
ENSG00000169715	MT1E	24.2252	2.88696	0.476839	6.05437	1.40971e-09	3.66801e-07
ENSG00000179639	FCER1A	566.876	0.737878	0.122393	6.02875	1.65234e-09	4.21666e-07
ENSG00000112159	MDN1	1018.54	-0.761404	0.127162	-5.98766	2.12883e-09	5.3301e-07
ENSG00000141380	SS18	1426.31	0.651265	0.109043	5.97253	2.33603e-09	5.74057e-07
ENSG00000084090	STARD7	3703.22	-0.597959	0.100586	-5.94476	2.7687e-09	6.68012e-07
ENSG00000066654	THUMPD1	778.412	-0.784965	0.135628	-5.78762	7.13925e-09	1.69175e-06
ENSG00000105063	PPP6R1	5333.94	-0.572037	0.0992026	-5.76635	8.10051e-09	1.88585e-06
ENSG00000265185	SNORD3B-1	50.5362	-1.85826	0.323782	-5.73925	9.50994e-09	2.17581e-06
ENSG00000135372	NAT10	2358.95	-0.61607	0.107995	-5.70463	1.16594e-08	2.62237e-06
ENSG00000149150	SLC43A1	532.453	-0.693764	0.123574	-5.61417	1.97504e-08	4.36813e-06
ENSG00000184009	ACTG1	99419.8	-0.548626	0.0978113	-5.60902	2.03472e-08	4.42635e-06
ENSG00000147164	SNX12	808.724	-0.635382	0.113973	-5.57482	2.47779e-08	5.30328e-06
ENSG00000171522	PTGER4	403.351	0.745405	0.133859	5.56858	2.56817e-08	5.32495e-06
ENSG00000125657	TNFSF9	401.768	0.857498	0.153932	5.57063	2.53825e-08	5.32495e-06
ENSG00000182809	CRIP2	142.051	1.4211	0.255372	5.56484	2.62399e-08	5.35697e-06
ENSG00000121690	DEPDC7	359.036	0.884472	0.1602	5.52106	3.36956e-08	6.77486e-06
ENSG00000137692	DCUN1D5	1597.05	-0.575095	0.104971	-5.47862	4.28647e-08	8.12593e-06
ENSG00000159592	GPBP1L1	1319.78	-0.616533	0.112515	-5.47955	4.26416e-08	8.12593e-06
ENSG00000138413	IDH1	981.3	0.760524	0.138814	5.47872	4.28404e-08	8.12593e-06
ENSG00000267519	MIR24-2	382.76	-0.835424	0.152485	-5.47871	4.28431e-08	8.12593e-06
ENSG00000183741	CBX6	2221.54	-0.696093	0.127453	-5.46156	4.71959e-08	8.82098e-06
ENSG00000126353	CCR7	109.205	1.09136	0.201677	5.41143	6.2523e-08	1.12223e-05
ENSG00000165178	NCF1C	375.719	0.809129	0.149487	5.41271	6.20783e-08	1.12223e-05
ENSG00000145335	SNCA	761.709	-0.673139	0.124396	-5.41126	6.25812e-08	1.12223e-05
ENSG00000115875	SRSF7	6010.64	-0.560435	0.103854	-5.39635	6.80107e-08	1.20334e-05
ENSG00000177542	SLC25A22	601.28	-0.684531	0.127368	-5.37444	7.68196e-08	1.34131e-05
ENSG00000253293	HOXA10	218.424	-0.872307	0.162758	-5.35954	8.34342e-08	1.41945e-05
ENSG00000204516	MICB	369.628	0.869488	0.162165	5.36174	8.24251e-08	1.41945e-05
ENSG00000168546	GFRA2	180.668	0.953386	0.179014	5.32577	1.00529e-07	1.68863e-05
ENSG00000068366	ACSL4	817.711	-0.619554	0.116771	-5.30571	1.12238e-07	1.86174e-05
ENSG00000185896	LAMP1	6391.25	-0.524247	0.0994733	-5.27023	1.36253e-07	2.2322e-05
ENSG00000120699	EXOSC8	1249.49	-0.630186	0.121129	-5.2026	1.96516e-07	3.1802e-05
ENSG00000260196	RP1-239B22.5	182.435	-0.876256	0.169225	-5.17806	2.24206e-07	3.58459e-05
ENSG00000114796	KLHL24	244.357	0.785054	0.152448	5.14965	2.60971e-07	4.12272e-05
ENSG00000123095	BHLHE41	47.7334	-1.49103	0.28983	-5.1445	2.68237e-07	4.18766e-05
ENSG00000198720	ANKRD13B	211.145	-0.840477	0.163747	-5.13279	2.85483e-07	4.40506e-05
ENSG00000182718	ANXA2	2373.81	0.576662	0.112402	5.13035	2.8921e-07	4.41129e-05
ENSG00000197879	MYO1C	915.256	0.554868	0.109144	5.08382	3.6991e-07	5.57808e-05
ENSG00000112584	FAM120B	274.079	-0.834581	0.164515	-5.07298	3.91642e-07	5.83943e-05
ENSG00000262074	SNORD3B-2	30.0088	-1.95047	0.384645	-5.07082	3.96098e-07	5.84024e-05
ENSG00000128591	FLNC	131.708	-0.945387	0.18655	-5.06775	4.02538e-07	5.86998e-05
ENSG00000130164	LDLR	1869.34	0.629049	0.124345	5.05892	4.21639e-07	6.08169e-05
ENSG00000157570	TSPAN18	82.6424	-1.18878	0.235492	-5.04808	4.46283e-07	6.36793e-05
ENSG00000158517	NCF1	581.282	0.733673	0.14561	5.0386	4.68947e-07	6.62013e-05
ENSG00000104081	BMF	880.537	0.605814	0.121098	5.00267	5.65412e-07	7.82982e-05
ENSG00000138442	WDR12	1063.21	-0.585729	0.117091	-5.00232	5.66438e-07	7.82982e-05
ENSG00000102081	FMR1	290.763	-0.702793	0.141386	-4.97073	6.6702e-07	9.12511e-05
ENSG00000204371	EHMT2	1499.66	-0.594315	0.119646	-4.96727	6.79035e-07	9.19469e-05
ENSG00000160953	MUM1	762.614	-0.599061	0.121184	-4.9434	7.67736e-07	0.000102908
ENSG00000179604	CDC42EP4	774.295	0.570602	0.11599	4.91942	8.68011e-07	0.000115185
ENSG00000119922	IFIT2	47.2637	1.41343	0.28815	4.90519	9.3335e-07	0.000122629
ENSG00000179344	HLA-DQB1	406.853	0.646067	0.132369	4.88082	1.05647e-06	0.000137445
ENSG00000110917	MLEC	4402.18	-0.480802	0.0986036	-4.87611	1.08196e-06	0.000139395
ENSG00000261889	RP11-473M20.16	23.7751	-2.30063	0.472075	-4.87344	1.09673e-06	0.000139939
ENSG00000152558	TMEM123	3105.26	-0.555498	0.114172	-4.86547	1.14187e-06	0.000144311
ENSG00000116459	ATP5F1	5181.24	-0.508851	0.105032	-4.84471	1.26799e-06	0.000158738
ENSG00000144867	SRPRB	1839.59	-0.531718	0.110009	-4.83341	1.34213e-06	0.000165259
ENSG00000104055	TGM5	3897.01	-0.462227	0.09564	-4.83299	1.34499e-06	0.000165259
ENSG00000184897	H1FX	8732.6	-0.655298	0.135924	-4.82106	1.42799e-06	0.000173847
ENSG00000125149	C16orf70	479.651	0.709268	0.147277	4.81588	1.46553e-06	0.000176796
ENSG00000101752	MIB1	715.73	-0.665397	0.138393	-4.80804	1.52417e-06	0.000182213
ENSG00000205755	CRLF2	75.2214	1.09847	0.228781	4.8014	1.57562e-06	0.000186538
ENSG00000060749	QSER1	381.305	-0.686468	0.143021	-4.79977	1.58845e-06	0.000186538
ENSG00000106261	ZKSCAN1	683.595	-0.58918	0.122979	-4.79089	1.66047e-06	0.000193284
ENSG00000164219	PGGT1B	574.244	-0.644993	0.134791	-4.78512	1.70882e-06	0.000197183
ENSG00000132965	ALOX5AP	107.263	0.996834	0.208472	4.78163	1.73883e-06	0.000198917
ENSG00000239305	RNF103	192.81	-0.844194	0.176949	-4.77084	1.83457e-06	0.000208075
ENSG00000067064	IDI1	1930.04	0.604493	0.126765	4.76863	1.85486e-06	0.000208593
ENSG00000117143	UAP1	546.284	-0.590815	0.125097	-4.72284	2.32571e-06	0.000259346
ENSG00000186810	CXCR3	738.591	0.550665	0.117158	4.70019	2.59924e-06	0.000287433
ENSG00000119899	SLC17A5	279.674	0.687894	0.146792	4.68619	2.78344e-06	0.000305259
ENSG00000155926	SLA	505.691	0.70875	0.151383	4.68184	2.84317e-06	0.000307741
ENSG00000165861	ZFYVE1	374.597	0.647095	0.138234	4.68117	2.85246e-06	0.000307741
ENSG00000124762	CDKN1A	4420.65	0.578642	0.124002	4.6664	3.0652e-06	0.000325599
ENSG00000112367	FIG4	265.152	-0.724154	0.155298	-4.66301	3.11613e-06	0.000325599
ENSG00000157911	PEX10	406.37	-0.656898	0.140841	-4.6641	3.09966e-06	0.000325599
ENSG00000198818	SFT2D1	855.03	-0.550621	0.118038	-4.66479	3.08937e-06	0.000325599
ENSG00000162757	C1orf74	120.538	0.891674	0.191393	4.65886	3.17961e-06	0.000329636
ENSG00000135679	MDM2	2823.19	0.545847	0.11789	4.63013	3.65434e-06	0.000375916
ENSG00000136048	DRAM1	806.844	0.610539	0.13191	4.62847	3.68385e-06	0.000376036
ENSG00000174839	DENND6A	475.965	0.587529	0.127026	4.62527	3.74117e-06	0.000378972
ENSG00000106804	C5	90.7175	-1.13841	0.246559	-4.61719	3.88978e-06	0.000391041
ENSG00000203485	INF2	1874.62	-0.569225	0.123416	-4.61225	3.98333e-06	0.000397434
ENSG00000033327	GAB2	975.554	-0.579883	0.125785	-4.61011	4.02462e-06	0.000398557
ENSG00000213463	SYNJ2BP	243.376	-0.739468	0.161046	-4.59166	4.39742e-06	0.00043225
ENSG00000081087	OSTM1	321.87	0.648587	0.141919	4.57012	4.87446e-06	0.000475618
ENSG00000120656	TAF12	428.55	-0.598703	0.131057	-4.56827	4.91772e-06	0.000476337
ENSG00000054282	SDCCAG8	945.329	-0.49627	0.108688	-4.56602	4.97076e-06	0.000477986
ENSG00000196735	HLA-DQA1	292.637	0.683691	0.149855	4.56235	5.05837e-06	0.00048291
ENSG00000156603	MED19	507.533	0.654284	0.143831	4.54898	5.39058e-06	0.00051095
ENSG00000100711	ZFYVE21	307.743	0.684087	0.150695	4.53956	5.63726e-06	0.000530542
ENSG00000148843	PDCD11	2424.56	-0.511713	0.112875	-4.53345	5.80271e-06	0.000538476
ENSG00000049245	VAMP3	914.852	0.491162	0.108332	4.53387	5.79133e-06	0.000538476
ENSG00000095059	DHPS	100.336	-1.05427	0.232894	-4.52682	5.98771e-06	0.000551784
ENSG00000100100	PIK3IP1	79.0101	1.03777	0.229347	4.52491	6.04218e-06	0.000552963
ENSG00000161638	ITGA5	3923.74	0.544888	0.121051	4.5013	6.75392e-06	0.000609963
ENSG00000114767	RRP9	1376.2	-0.637554	0.141641	-4.5012	6.75694e-06	0.000609963
ENSG00000135046	ANXA1	3734.09	0.46173	0.102629	4.49904	6.82623e-06	0.000612055
ENSG00000167625	ZNF526	379.958	0.662599	0.147538	4.49103	7.08809e-06	0.000631268
ENSG00000112697	TMEM30A	2965.08	-0.519039	0.115658	-4.4877	7.1996e-06	0.000636925
ENSG00000154188	ANGPT1	560.158	-0.628721	0.140477	-4.47561	7.61936e-06	0.000669596
ENSG00000005379	TSPOAP1	3365.54	-0.484794	0.108871	-4.45293	8.47075e-06	0.000739519
ENSG00000143507	DUSP10	404.865	0.581696	0.131012	4.44001	8.99546e-06	0.000780195
ENSG00000162437	RAVER2	266.026	-0.637533	0.144407	-4.41484	1.01085e-05	0.000871039
ENSG00000139514	SLC7A1	1509.26	-0.570412	0.129486	-4.40522	1.05678e-05	0.000898942
ENSG00000168884	TNIP2	1076.71	-0.60374	0.137044	-4.40545	1.05566e-05	0.000898942
ENSG00000107566	ERLIN1	1521.97	-0.609415	0.138553	-4.39844	1.09033e-05	0.00091772
ENSG00000115216	NRBP1	2657.09	0.461818	0.105007	4.39797	1.09269e-05	0.00091772
ENSG00000166949	SMAD3	519.04	0.542522	0.123604	4.3892	1.13767e-05	0.00094949
ENSG00000205423	CNEP1R1	169.214	0.825854	0.188281	4.38627	1.15309e-05	0.000950405
ENSG00000166788	SAAL1	654.4	-0.5128	0.116882	-4.38733	1.1475e-05	0.000950405
ENSG00000071246	VASH1	576.95	-0.578688	0.132074	-4.38153	1.17848e-05	0.000965339
ENSG00000167565	SERTAD3	270.837	0.626046	0.143042	4.37666	1.20512e-05	0.000981098
ENSG00000170035	UBE2E3	1248.56	-0.485793	0.111059	-4.37417	1.21893e-05	0.000986295
ENSG00000151694	ADAM17	817.168	0.545829	0.124877	4.37092	1.23725e-05	0.000995052
ENSG00000118503	TNFAIP3	310.629	0.647229	0.148308	4.3641	1.2765e-05	0.00102043
ENSG00000134049	IER3IP1	539.683	-0.569593	0.130632	-4.3603	1.29885e-05	0.00103208
ENSG00000204287	HLA-DRA	4254.77	0.505259	0.116204	4.34803	1.37364e-05	0.00107463
ENSG00000134070	IRAK2	135.588	0.926468	0.213101	4.34755	1.37669e-05	0.00107463
ENSG00000137575	SDCBP	1968.96	0.46945	0.107968	4.34803	1.37366e-05	0.00107463
ENSG00000125910	S1PR4	2248.49	-0.655648	0.151055	-4.34047	1.42181e-05	0.00109694
ENSG00000171101	SIGLEC17P	330.025	-0.633076	0.145826	-4.34131	1.41635e-05	0.00109694
ENSG00000178105	DDX10	721.823	-0.543893	0.125541	-4.33238	1.47504e-05	0.00113143
ENSG00000154803	FLCN	454.72	0.573675	0.132488	4.33002	1.49097e-05	0.00113598
ENSG00000105856	HBP1	213.345	0.70408	0.162644	4.32897	1.49808e-05	0.00113598
ENSG00000197013	ZNF429	291.664	0.620708	0.143721	4.31882	1.56863e-05	0.00118271
ENSG00000182487	NCF1B	107.492	0.977058	0.226987	4.30447	1.67384e-05	0.0012549
ENSG00000110921	MVK	624.865	0.514697	0.119668	4.30104	1.69997e-05	0.00126733
ENSG00000004478	FKBP4	5023.6	-0.413777	0.0963966	-4.29244	1.76718e-05	0.0013028
ENSG00000184986	TMEM121	63.2557	-1.17675	0.274073	-4.29356	1.75832e-05	0.0013028
ENSG00000175538	KCNE3	436.939	0.676692	0.157771	4.28908	1.79415e-05	0.00131538
ENSG00000171262	FAM98B	1109.57	-0.477335	0.111337	-4.28728	1.80871e-05	0.00131877
ENSG00000164674	SYTL3	88.4603	1.00984	0.235654	4.28528	1.82511e-05	0.00131912
ENSG00000125735	TNFSF14	211.628	0.735614	0.17168	4.2848	1.82908e-05	0.00131912
ENSG00000162928	PEX13	348.718	0.679024	0.158558	4.2825	1.84804e-05	0.0013256
ENSG00000087095	NLK	340.166	-0.593508	0.138868	-4.27391	1.92071e-05	0.00137031
ENSG00000160888	IER2	3373.34	-0.647199	0.151531	-4.27108	1.94526e-05	0.00138041
ENSG00000204394	VARS	3508.01	-0.436376	0.102229	-4.2686	1.96703e-05	0.00138843
ENSG00000116954	RRAGC	300.353	0.599393	0.140907	4.25382	2.10154e-05	0.00147553
ENSG00000023330	ALAS1	1503.02	0.579157	0.136296	4.24927	2.14472e-05	0.00149792
ENSG00000140948	ZCCHC14	259.831	0.631871	0.149139	4.23679	2.26738e-05	0.0015753
ENSG00000148834	GSTO1	2578.63	-0.497638	0.117654	-4.22967	2.34039e-05	0.00160917
ENSG00000184557	SOCS3	523.422	0.566901	0.133999	4.23063	2.33041e-05	0.00160917
ENSG00000231389	HLA-DPA1	1066.96	0.489044	0.115783	4.22379	2.4023e-05	0.00164282
ENSG00000274536	MIR223	501.874	0.601012	0.142329	4.22268	2.41409e-05	0.00164282
ENSG00000119655	NPC2	584.145	0.515604	0.12286	4.19668	2.70857e-05	0.00183382
ENSG00000072506	HSD17B10	2185.86	0.579326	0.13814	4.19375	2.74385e-05	0.00184751
ENSG00000116649	SRM	3973.52	-0.405775	0.0967816	-4.19269	2.75665e-05	0.00184751
ENSG00000142185	TRPM2	1386.62	-0.518413	0.123702	-4.19081	2.77961e-05	0.00185354
ENSG00000177943	MAMDC4	126.87	-0.833828	0.199049	-4.18906	2.80109e-05	0.00185852
ENSG00000265972	TXNIP	3981.97	0.489179	0.116941	4.18312	2.87538e-05	0.00188893
ENSG00000154127	UBASH3B	399.114	-0.534614	0.127784	-4.18375	2.86739e-05	0.00188893
ENSG00000164902	PHAX	964.293	-0.511459	0.122527	-4.17427	2.98942e-05	0.00195417
ENSG00000160145	KALRN	73.7724	-1.02133	0.245016	-4.16842	3.06722e-05	0.0019952
ENSG00000138764	CCNG2	109.218	0.81467	0.195759	4.1616	3.16026e-05	0.00203576
ENSG00000177125	ZBTB34	302.836	0.604077	0.145123	4.16253	3.14745e-05	0.00203576
ENSG00000223609	HBD	442.927	0.56763	0.136553	4.15685	3.22669e-05	0.00206851
ENSG00000146425	DYNLT1	478.342	0.577743	0.139234	4.14942	3.33317e-05	0.0021265
ENSG00000160058	BSDC1	869.97	0.46662	0.11262	4.14331	3.4233e-05	0.0021632
ENSG00000133935	C14orf1	1466.53	0.500896	0.120875	4.14391	3.4143e-05	0.0021632
ENSG00000092964	DPYSL2	546.108	0.492723	0.118957	4.14201	3.44276e-05	0.00216519
ENSG00000188211	NCR3LG1	147.986	-0.867559	0.20963	-4.13852	3.49552e-05	0.002188
ENSG00000118513	MYB	3669.44	0.473227	0.114407	4.13635	3.52867e-05	0.00219837
ENSG00000231074	HCG18	609.78	-0.497031	0.120354	-4.12973	3.63194e-05	0.00225214
ENSG00000117748	RPA2	2535.65	-0.444778	0.107756	-4.12764	3.665e-05	0.00226207
ENSG00000102967	DHODH	541.486	-0.559976	0.135728	-4.12572	3.69572e-05	0.00227047
ENSG00000091073	DTX2	527.708	0.541313	0.131278	4.12339	3.73332e-05	0.002283
ENSG00000167114	SLC27A4	1065.04	-0.510628	0.124109	-4.11435	3.88271e-05	0.00235267
ENSG00000109079	TNFAIP1	252.287	0.628941	0.152851	4.11472	3.87647e-05	0.00235267
ENSG00000196756	SNHG17	1624.32	-0.433836	0.10612	-4.08816	4.34815e-05	0.00262273
ENSG00000105204	DYRK1B	194.054	0.685381	0.167892	4.08227	4.45976e-05	0.00267787
ENSG00000050748	MAPK9	555.251	-0.527425	0.129698	-4.06657	4.77108e-05	0.0028519
ENSG00000148468	FAM171A1	262.596	0.677526	0.16692	4.05898	4.92872e-05	0.00293292
ENSG00000118785	SPP1	496.318	0.619877	0.152909	4.05391	5.03695e-05	0.00298394
ENSG00000076003	MCM6	4322	-0.426377	0.105467	-4.04275	5.28273e-05	0.00311564
ENSG00000112110	MRPL18	1329.66	-0.421186	0.10444	-4.0328	5.5116e-05	0.00323623
ENSG00000125945	ZNF436	150.885	0.823231	0.204255	4.03041	5.56792e-05	0.0032549
ENSG00000105737	GRIK5	399.183	-0.575555	0.14301	-4.02458	5.70781e-05	0.00330754
ENSG00000197747	S100A10	489.803	0.591438	0.146934	4.0252	5.69263e-05	0.00330754
ENSG00000111142	METAP2	5046.86	-0.570589	0.142127	-4.01464	5.95374e-05	0.00343505
ENSG00000164045	CDC25A	1277.79	-0.436843	0.108913	-4.01092	6.04833e-05	0.00347451
ENSG00000169592	INO80E	1391.41	-0.522775	0.130406	-4.00884	6.10184e-05	0.00349015
ENSG00000100034	PPM1F	2083.76	-0.454813	0.113591	-4.00396	6.22921e-05	0.00354771
ENSG00000026025	VIM	15410.4	0.403174	0.100725	4.00272	6.2619e-05	0.00355109
ENSG00000186603	HPDL	211.213	-0.71478	0.178773	-3.99825	6.38114e-05	0.00356153
ENSG00000169756	LIMS1	1744.71	-0.458353	0.114615	-3.99908	6.35889e-05	0.00356153
ENSG00000185022	MAFF	178.43	-0.823538	0.206008	-3.99761	6.39851e-05	0.00356153
ENSG00000167100	SAMD14	138.938	-0.786374	0.196724	-3.99735	6.40554e-05	0.00356153
ENSG00000124222	STX16	1054.36	-0.428404	0.107181	-3.99702	6.41451e-05	0.00356153
ENSG00000148143	ZNF462	71.4318	-0.992969	0.248525	-3.99545	6.45709e-05	0.00357023
ENSG00000119328	FAM206A	169.872	-0.741957	0.185779	-3.99375	6.5036e-05	0.00358028
ENSG00000134363	FST	342.718	-0.537926	0.134723	-3.99282	6.52923e-05	0.00358028
ENSG00000173221	GLRX	414.226	-0.53024	0.132868	-3.99074	6.58675e-05	0.00358222
ENSG00000205659	LIN52	417.808	0.538841	0.13502	3.99083	6.58412e-05	0.00358222
ENSG00000124802	EEF1E1	239.014	-0.624338	0.15664	-3.98582	6.72463e-05	0.00364228
ENSG00000068697	LAPTM4A	1443.26	0.494185	0.124154	3.98043	6.87902e-05	0.00370271
ENSG00000227124	ZNF717	160.44	-0.715245	0.179711	-3.97998	6.89202e-05	0.00370271
ENSG00000114013	CD86	211.269	0.609886	0.153627	3.96993	7.18953e-05	0.00384698
ENSG00000174177	CTU2	418.228	-0.55661	0.140275	-3.96799	7.24823e-05	0.00386281
ENSG00000153234	NR4A2	402.01	0.764247	0.192697	3.96606	7.30707e-05	0.00387859
ENSG00000164300	SERINC5	268.196	0.649431	0.163948	3.96121	7.4572e-05	0.00394251
ENSG00000169891	REPS2	65.0234	1.00769	0.254626	3.95756	7.57203e-05	0.00398733
ENSG00000043514	TRIT1	369.948	-0.564935	0.14281	-3.95584	7.6267e-05	0.00400025
ENSG00000142867	BCL10	308.887	0.593031	0.150001	3.9535	7.70159e-05	0.00402363
ENSG00000126107	HECTD3	412.588	-0.546547	0.138429	-3.94821	7.87376e-05	0.00409744
ENSG00000113369	ARRDC3	443.816	0.564174	0.142998	3.94534	7.9688e-05	0.00411463
ENSG00000167106	FAM102A	437.538	0.518469	0.131405	3.94558	7.96058e-05	0.00411463
ENSG00000110104	CCDC86	933.853	-0.499319	0.1267	-3.94095	8.11612e-05	0.00417445
ENSG00000184575	XPOT	2125.61	-0.469801	0.119247	-3.93971	8.15793e-05	0.00417976
ENSG00000125971	DYNLRB1	174.662	0.724295	0.183985	3.93671	8.26047e-05	0.00421602
ENSG00000241839	PLEKHO2	916.387	0.519848	0.132232	3.93132	8.44819e-05	0.00426264
ENSG00000137642	SORL1	769.057	0.483877	0.123039	3.93272	8.39897e-05	0.00426264
ENSG00000173757	STAT5B	1261.78	-0.453547	0.115354	-3.9318	8.43137e-05	0.00426264
ENSG00000110076	NRXN2	3168.75	-0.40168	0.102296	-3.92664	8.61399e-05	0.00432983
ENSG00000131408	NR1H2	1847.35	0.430939	0.109976	3.91846	8.91163e-05	0.00446254
ENSG00000113048	MRPS27	2457.62	-0.420658	0.107429	-3.91568	9.01509e-05	0.00449738
ENSG00000159110	IFNAR2	452.065	0.546367	0.139698	3.91104	9.18981e-05	0.00456737
ENSG00000215271	HOMEZ	168.963	0.660272	0.168933	3.90848	9.28786e-05	0.00459888
ENSG00000135077	HAVCR2	300.87	0.539559	0.138165	3.90518	9.41556e-05	0.00464478
ENSG00000167193	CRK	1067.28	0.44638	0.114352	3.90355	9.47902e-05	0.00465876
ENSG00000118707	TGIF2	1213.37	0.456292	0.116969	3.90097	9.58084e-05	0.00469143
ENSG00000079332	SAR1A	1299.35	-0.428728	0.110036	-3.89624	9.76972e-05	0.00476633
ENSG00000100079	LGALS2	61.607	1.09921	0.282431	3.89196	9.94361e-05	0.0048334
ENSG00000086061	DNAJA1	5179.68	-0.438694	0.112744	-3.89105	9.98106e-05	0.00483389
ENSG00000116852	KIF21B	307.098	-0.558206	0.143496	-3.89004	0.000100227	0.00483641
ENSG00000084444	FAM234B	189.728	-0.642563	0.165297	-3.88732	0.000101358	0.00487295
ENSG00000237424	FOXD2-AS1	198.708	-0.633673	0.163107	-3.88502	0.000102323	0.00487295
ENSG00000145725	PPIP5K2	830	-0.506922	0.130484	-3.88494	0.000102356	0.00487295
ENSG00000125834	STK35	537.925	0.549831	0.141537	3.88471	0.000102453	0.00487295
ENSG00000159753	CARMIL2	690.491	-0.473606	0.122002	-3.88195	0.00010362	0.00489894
ENSG00000131747	TOP2A	6116.39	-0.494292	0.12734	-3.88168	0.000103738	0.00489894
ENSG00000065675	PRKCQ	396.597	-0.600272	0.154826	-3.87707	0.000105722	0.00497494
ENSG00000250899	RP11-253E3.3	94.6758	-0.816307	0.210697	-3.87431	0.000106928	0.00501392
ENSG00000160117	ANKLE1	152.41	-0.745729	0.192687	-3.87016	0.000108762	0.00508195
ENSG00000088826	SMOX	714.241	0.509368	0.131675	3.86838	0.00010956	0.00510125
ENSG00000117640	MTFR1L	651.145	-0.461475	0.119329	-3.86725	0.000110068	0.00510701
ENSG00000141384	TAF4B	271.228	-0.558359	0.144526	-3.86339	0.000111825	0.00517045
ENSG00000133048	CHI3L1	534.637	0.546071	0.141914	3.84791	0.000119128	0.00546999
ENSG00000008513	ST3GAL1	1153.89	0.442861	0.115075	3.84845	0.000118865	0.00546999
ENSG00000107819	SFXN3	1169.59	0.411355	0.106956	3.84603	0.000120045	0.00549311
ENSG00000136240	KDELR2	712.039	0.446952	0.116339	3.84182	0.000122123	0.005569
ENSG00000063978	RNF4	2066.68	0.489279	0.127441	3.83927	0.000123402	0.00560804
ENSG00000162616	DNAJB4	97.9545	0.79108	0.206354	3.83361	0.000126275	0.00571901
ENSG00000112343	TRIM38	1330.19	0.406561	0.106085	3.8324	0.000126901	0.0057278
ENSG00000164713	BRI3	362.968	0.553381	0.14456	3.82804	0.000129169	0.0058104
ENSG00000139372	TDG	1961.66	-0.498538	0.130366	-3.82414	0.000131229	0.00588313
ENSG00000198380	GFPT1	317.479	-0.579949	0.151704	-3.82288	0.000131899	0.00589329
ENSG00000099785	MARCH2	331.737	0.534019	0.139738	3.82158	0.000132597	0.00590459
ENSG00000163191	S100A11	2465.54	0.40331	0.105578	3.82002	0.000133443	0.00592239
ENSG00000126860	EVI2A	145.741	0.689133	0.180928	3.80888	0.0001396	0.00616242
ENSG00000178695	KCTD12	161.981	-0.694398	0.182326	-3.80856	0.000139781	0.00616242
ENSG00000112559	MDFI	149.619	-0.696845	0.183062	-3.8066	0.000140891	0.00617035
ENSG00000255717	SNHG1	4285.84	-0.421621	0.110748	-3.80704	0.000140642	0.00617035
ENSG00000165029	ABCA1	98.7322	0.769015	0.2025	3.79761	0.000146101	0.00632989
ENSG00000198876	DCAF12	1209.78	0.559475	0.147292	3.7984	0.000145633	0.00632989
ENSG00000278619	MRM1	433.485	-0.594387	0.156511	-3.79774	0.000146019	0.00632989
ENSG00000167881	SRP68	1911.95	-0.426908	0.112432	-3.79703	0.000146441	0.00632989
ENSG00000166900	STX3	365.636	0.551655	0.145323	3.79605	0.000147017	0.00633416
ENSG00000116514	RNF19B	833.937	0.446929	0.117834	3.79286	0.000148923	0.00639548
ENSG00000188997	KCTD21	105.987	0.761994	0.20099	3.79121	0.000149918	0.00641744
ENSG00000005020	SKAP2	793.217	-0.45547	0.120237	-3.7881	0.000151803	0.00647724
ENSG00000257017	HP	232.23	0.56131	0.148507	3.77968	0.000157031	0.00667884
ENSG00000110925	CSRNP2	189.453	0.666553	0.176462	3.77732	0.000158527	0.00670058
ENSG00000167264	DUS2	356.755	-0.529914	0.140334	-3.7761	0.000159305	0.00670058
ENSG00000272256	RP11-489E7.4	86.5702	-1.07765	0.285365	-3.7764	0.000159113	0.00670058
ENSG00000167895	TMC8	3287.68	-0.367251	0.097267	-3.7757	0.000159562	0.00670058
ENSG00000092201	SUPT16H	3973.09	-0.386898	0.102641	-3.76942	0.000163627	0.00684963
ENSG00000164626	KCNK5	404.645	-0.513456	0.13627	-3.76792	0.000164611	0.00686913
ENSG00000141232	TOB1	235.242	0.613948	0.163241	3.76098	0.000169247	0.00704046
ENSG00000175489	LRRC25	51.6597	1.10404	0.29387	3.7569	0.000172031	0.0071339
ENSG00000175899	A2M	507.533	0.494113	0.131569	3.75554	0.000172965	0.00715032
ENSG00000134480	CCNH	721.66	-0.437675	0.116632	-3.75263	0.000174992	0.00721163
ENSG00000184988	TMEM106A	335.624	-0.560179	0.149382	-3.74999	0.000176842	0.00726532
ENSG00000132773	TOE1	1014.7	-0.424531	0.11327	-3.74797	0.000178271	0.00730143
ENSG00000080546	SESN1	474.511	0.524282	0.139919	3.74704	0.000178937	0.00730612
ENSG00000005469	CROT	236.656	0.557604	0.14899	3.74255	0.000182163	0.00741505
ENSG00000158109	TPRG1L	507.923	-0.463236	0.123861	-3.73996	0.000184053	0.00746351
ENSG00000142065	ZFP14	114.212	0.748735	0.20023	3.73937	0.000184479	0.00746351
ENSG00000107897	ACBD5	247.412	0.569361	0.152412	3.73567	0.000187213	0.00752824
ENSG00000169184	MN1	142.589	0.71308	0.190884	3.73568	0.00018721	0.00752824
ENSG00000104946	TBC1D17	414.902	0.476597	0.127619	3.73454	0.000188059	0.00753942
ENSG00000171163	ZNF692	819.827	-0.457848	0.122742	-3.73016	0.000191361	0.00764867
ENSG00000086827	ZW10	462.328	-0.487202	0.130976	-3.71977	0.000199402	0.00794615
ENSG00000146281	PM20D2	884.104	-0.441215	0.118727	-3.71621	0.000202237	0.00803498
ENSG00000178726	THBD	535.632	0.58905	0.158617	3.71367	0.000204279	0.00809188
ENSG00000101236	RNF24	2708.38	0.434963	0.117167	3.71234	0.000205348	0.00811002
ENSG00000223802	CERS1	50.8596	-1.09301	0.29529	-3.70147	0.000214352	0.00844052
ENSG00000161011	SQSTM1	5279.32	0.393796	0.106559	3.69558	0.000219388	0.00861326
ENSG00000155307	SAMSN1	347.996	0.509945	0.138111	3.69229	0.000222246	0.00869972
ENSG00000225921	NOL7	2321.75	-0.413069	0.112077	-3.68558	0.000228179	0.00890568
ENSG00000184209	SNRNP35	655.164	-0.516215	0.140145	-3.68344	0.000230108	0.00895463
ENSG00000145284	SCD5	478.304	-0.524565	0.142642	-3.6775	0.000235534	0.00913901
ENSG00000197903	HIST1H2BK	192.62	0.591809	0.161046	3.67479	0.000238044	0.00920947
ENSG00000185432	METTL7A	1445.1	0.400418	0.109005	3.6734	0.000239349	0.00923302
ENSG00000164236	ANKRD33B	324.678	0.543199	0.148064	3.66866	0.000243821	0.00937827
ENSG00000105849	TWISTNB	508.737	-0.608202	0.165892	-3.66626	0.000246124	0.00943949
ENSG00000237753	AC079922.3	61.7121	-0.943278	0.257341	-3.66548	0.000246873	0.00944094
ENSG00000078549	ADCYAP1R1	152.085	-0.757568	0.206859	-3.66225	0.000250013	0.00950624
ENSG00000130589	HELZ2	351.544	0.542206	0.148028	3.66287	0.000249407	0.00950624
ENSG00000137841	PLCB2	2492.42	-0.399779	0.109322	-3.65691	0.000255278	0.00967868
ENSG00000075223	SEMA3C	22.4379	1.44237	0.395064	3.65097	0.000261251	0.00987692
ENSG00000017483	SLC38A5	1212.22	-0.437291	0.119903	-3.64705	0.000265273	0.0100005
ENSG00000021355	SERPINB1	8623.64	-0.341767	0.0937622	-3.64505	0.000267345	0.0100356
ENSG00000083844	ZNF264	620.78	0.430825	0.118206	3.64469	0.000267718	0.0100356
ENSG00000122547	EEPD1	177.248	0.587174	0.161274	3.64085	0.000271744	0.0101579
ENSG00000118985	ELL2	594.737	0.44014	0.120976	3.63823	0.000274515	0.0102326
ENSG00000135720	DYNC1LI2	980.354	0.471461	0.129655	3.63627	0.000276618	0.0102601
ENSG00000136167	LCP1	11851.7	-0.38849	0.106843	-3.6361	0.000276797	0.0102601
ENSG00000100906	NFKBIA	1369.19	0.413344	0.113774	3.63303	0.000280115	0.0103541
ENSG00000125844	RRBP1	2463.35	-0.424744	0.117074	-3.62799	0.000285633	0.0105288
ENSG00000267534	S1PR2	98.4028	0.719526	0.198498	3.62485	0.000289127	0.010628
ENSG00000151702	FLI1	1955.42	0.369368	0.10193	3.62374	0.000290376	0.0106444
ENSG00000078687	TNRC6C	195.014	0.708857	0.195767	3.62093	0.000293551	0.0107312
ENSG00000120438	TCP1	7132.63	-0.435187	0.120728	-3.60469	0.000312526	0.0113935
ENSG00000169499	PLEKHA2	1188.37	0.387932	0.108041	3.59062	0.000329893	0.0119936
ENSG00000167280	ENGASE	365.509	-0.56131	0.156407	-3.58879	0.000332221	0.0120453
ENSG00000176619	LMNB2	4498.43	-0.404929	0.11297	-3.5844	0.000337853	0.0122161
ENSG00000011376	LARS2	613.99	-0.440392	0.122922	-3.58271	0.000340049	0.0122289
ENSG00000171928	TVP23B	307.752	0.561644	0.156755	3.58295	0.000339732	0.0122289
ENSG00000139405	RITA1	1307.12	-0.39445	0.110471	-3.57063	0.000356121	0.0127722
ENSG00000131187	F12	636.973	-0.536359	0.150412	-3.56593	0.000362572	0.0129549
ENSG00000003436	TFPI	268.447	0.538169	0.150938	3.5655	0.000363167	0.0129549
ENSG00000176095	IP6K1	1308	0.456659	0.128103	3.56478	0.000364163	0.0129556
ENSG00000162396	PARS2	125.009	0.753726	0.211548	3.56291	0.000366769	0.0130134
ENSG00000101194	SLC17A9	985.45	-0.468438	0.131668	-3.55772	0.000374093	0.0132027
ENSG00000174282	ZBTB4	429.224	0.458621	0.128884	3.5584	0.000373124	0.0132027
ENSG00000104765	BNIP3L	704.336	0.439458	0.123678	3.55324	0.00038052	0.0133939
ENSG00000087263	OGFOD1	988.485	-0.424659	0.119613	-3.55028	0.000384826	0.0134385
ENSG00000204396	VWA7	28.7462	1.2823	0.36115	3.55061	0.000384334	0.0134385
ENSG00000136870	ZNF189	269.18	0.563844	0.158801	3.55063	0.000384313	0.0134385
ENSG00000115966	ATF2	553.512	0.48167	0.135731	3.5487	0.000387137	0.0134485
ENSG00000005100	DHX33	840.556	-0.465246	0.131097	-3.54888	0.000386873	0.0134485
ENSG00000163513	TGFBR2	590.699	0.471688	0.132992	3.54674	0.000390028	0.0135135
ENSG00000155850	SLC26A2	293.513	-0.554398	0.15655	-3.54136	0.000398074	0.0137563
ENSG00000186001	LRCH3	766.948	0.400298	0.113158	3.5375	0.000403927	0.0139224
ENSG00000138678	GPAT3	691.236	0.469109	0.133065	3.52541	0.000422827	0.0144611
ENSG00000120694	HSPH1	2105.39	-0.414988	0.117684	-3.52629	0.000421431	0.0144611
ENSG00000184967	NOC4L	1163.49	-0.430615	0.122144	-3.52546	0.000422751	0.0144611
ENSG00000170846	AC093323.3	640.635	-0.4337	0.123075	-3.52386	0.000425304	0.0144991
ENSG00000197283	SYNGAP1	235.615	-0.607434	0.172402	-3.52335	0.000426122	0.0144991
ENSG00000265688	MAFG-AS1	129.484	-0.725002	0.205868	-3.52169	0.000428809	0.0145532
ENSG00000125730	C3	35.311	1.10599	0.314579	3.51577	0.000438479	0.0147681
ENSG00000180573	HIST1H2AC	165.542	0.603943	0.171746	3.51649	0.000437297	0.0147681
ENSG00000116497	S100PBP	614.938	0.435224	0.123772	3.51634	0.000437541	0.0147681
ENSG00000204634	TBC1D8	267.235	0.583862	0.16612	3.5147	0.000440253	0.0147903
ENSG00000114541	FRMD4B	248.731	-0.520097	0.148057	-3.51281	0.000443402	0.0148585
ENSG00000276085	CCL3L3	132.748	0.802722	0.228945	3.50617	0.000454598	0.0150949
ENSG00000177606	JUN	3267.79	-2.14667	0.612283	-3.506	0.000454891	0.0150949
ENSG00000172731	LRRC20	162.136	-0.601241	0.171473	-3.50634	0.000454315	0.0150949
ENSG00000156968	MPV17L	104.869	-0.721618	0.205906	-3.50461	0.000457283	0.0150949
ENSG00000126458	RRAS	201.824	0.613046	0.174912	3.50488	0.00045681	0.0150949
ENSG00000287985		33.3917	1.1841	0.337779	3.50553	0.000455691	0.0150949
ENSG00000102218	RP2	486.595	0.501019	0.143049	3.50243	0.00046104	0.0151811
ENSG00000166197	NOLC1	4625.62	-0.351197	0.100402	-3.49791	0.000468914	0.0153913
ENSG00000049246	PER3	106.819	-0.817406	0.233715	-3.49744	0.000469741	0.0153913
ENSG00000121797	CCRL2	99.1623	0.743279	0.212653	3.49527	0.000473583	0.0154789
ENSG00000106785	TRIM14	549.683	-0.486338	0.139224	-3.49321	0.000477258	0.0155607
ENSG00000070831	CDC42	6702.64	0.334035	0.0956566	3.49202	0.000479375	0.0155914
ENSG00000143862	ARL8A	1100.17	0.413601	0.1185	3.49031	0.000482452	0.0156531
ENSG00000159256	MORC3	410.814	0.474694	0.136356	3.48128	0.000499024	0.0161514
ENSG00000185838	GNB1L	160.728	-0.587823	0.16905	-3.47722	0.000506642	0.0163183
ENSG00000136689	IL1RN	446.849	0.448538	0.12898	3.47758	0.000505954	0.0163183
ENSG00000130741	EIF2S3	5922.15	-0.347251	0.0999068	-3.47575	0.000509427	0.0163683
ENSG00000006625	GGCT	424.663	-0.473939	0.136707	-3.46683	0.000526632	0.0168802
ENSG00000211460	TSN	2184.29	-0.371513	0.107222	-3.4649	0.000530435	0.0169612
ENSG00000110324	IL10RA	1734.33	0.41621	0.120156	3.46391	0.000532391	0.0169828
ENSG00000114450	GNB4	1170.61	-0.403805	0.116665	-3.46122	0.000537726	0.0170301
ENSG00000198121	LPAR1	93.5309	0.747533	0.215925	3.46201	0.000536163	0.0170301
ENSG00000130150	MOSPD2	138.433	0.63094	0.182273	3.4615	0.000537165	0.0170301
ENSG00000163964	PIGX	893.926	-0.38376	0.110919	-3.45982	0.000540538	0.0170784
ENSG00000174600	CMKLR1	106.873	0.696093	0.201434	3.45569	0.000548889	0.0173011
ENSG00000226777	FAM30A	3875.38	-0.343871	0.0995476	-3.45434	0.000551637	0.0173465
ENSG00000171368	TPPP	42.7194	1.23852	0.358658	3.4532	0.000553986	0.0173792
ENSG00000106993	CDC37L1	222.522	0.603277	0.174763	3.45197	0.000556507	0.0174171
ENSG00000122729	ACO1	425.355	-0.444941	0.128963	-3.45015	0.000560285	0.0174941
ENSG00000135956	TMEM127	1464.67	0.409709	0.118796	3.44883	0.000563017	0.0175381
ENSG00000103642	LACTB	412.139	0.449305	0.130307	3.44804	0.000564675	0.0175486
ENSG00000151726	ACSL1	461.23	0.516128	0.149882	3.44358	0.000574074	0.0177594
ENSG00000155100	OTUD6B	213.752	-0.555574	0.161338	-3.44355	0.000574135	0.0177594
ENSG00000132185	FCRLA	146.409	0.617722	0.179639	3.43867	0.000584569	0.0180096
ENSG00000073711	PPP2R3A	128.514	0.655301	0.190578	3.4385	0.00058494	0.0180096
ENSG00000210082	MT-RNR2	133792	0.399452	0.116225	3.43688	0.000588447	0.0180339
ENSG00000123213	NLN	460.325	-0.456431	0.132786	-3.43733	0.00058748	0.0180339
ENSG00000198612	COPS8	605.177	-0.40332	0.117452	-3.43391	0.000594952	0.0181913
ENSG00000206417	H1FX-AS1	116.771	-0.703739	0.205015	-3.43262	0.000597771	0.0182354
ENSG00000163219	ARHGAP25	1349.61	0.458449	0.133627	3.43081	0.000601774	0.0182561
ENSG00000112237	CCNC	896.647	-0.386088	0.112547	-3.43045	0.000602575	0.0182561
ENSG00000019991	HGF	144.181	-0.624967	0.182116	-3.43169	0.000599839	0.0182561
ENSG00000154328	NEIL2	283.371	-0.501266	0.146221	-3.42815	0.000607707	0.0183696
ENSG00000165169	DYNLT3	203.019	0.530454	0.154827	3.42612	0.000612274	0.0184268
ENSG00000184182	UBE2F	387.36	-0.474564	0.138516	-3.42607	0.000612377	0.0184268
ENSG00000125772	GPCPD1	246.074	-0.501908	0.146759	-3.41994	0.000626349	0.0188046
ENSG00000095383	TBC1D2	261.234	0.504746	0.147678	3.41789	0.000631098	0.0189044
ENSG00000237973	MTCO1P12	509.674	0.513131	0.150163	3.41716	0.00063278	0.0189121
ENSG00000147650	LRP12	226.973	0.576224	0.168664	3.41641	0.00063452	0.0189215
ENSG00000132436	FIGNL1	173.402	0.565391	0.165602	3.41414	0.000639827	0.0189944
ENSG00000115548	KDM3A	840.842	0.40503	0.118617	3.4146	0.000638747	0.0189944
ENSG00000080815	PSEN1	1580.15	0.365452	0.107062	3.41344	0.000641479	0.019001
ENSG00000080802	CNOT4	144.054	0.622456	0.182419	3.41224	0.000644324	0.0190427
ENSG00000177721	ANXA2R	147.15	-0.615561	0.180478	-3.41072	0.000647926	0.0190643
ENSG00000020129	NCDN	679.55	-0.404846	0.118681	-3.41122	0.000646738	0.0190643
ENSG00000151233	GXYLT1	441.869	-0.502228	0.147376	-3.4078	0.000654886	0.0191924
ENSG00000184357	HIST1H1B	35.4194	1.30206	0.382098	3.40765	0.000655244	0.0191924
ENSG00000197619	ZNF615	82.911	0.777241	0.228125	3.40708	0.000656621	0.0191924
ENSG00000065057	NTHL1	599.936	-0.574688	0.169145	-3.3976	0.000679796	0.0197826
ENSG00000234420	ZNF37BP	183.807	-0.564496	0.166125	-3.39803	0.00067874	0.0197826
ENSG00000132467	UTP3	878.836	-0.373709	0.110016	-3.39687	0.000681608	0.019792
ENSG00000108773	KAT2A	1208.37	-0.38624	0.113932	-3.39011	0.000698654	0.0201986
ENSG00000134294	SLC38A2	2632.39	0.388147	0.114482	3.39045	0.00069778	0.0201986
ENSG00000181852	RNF41	1733.62	0.36668	0.108257	3.38713	0.000706289	0.0203749
ENSG00000119242	CCDC92	342.361	0.465756	0.137591	3.38508	0.000711584	0.0204388
ENSG00000067182	TNFRSF1A	4355.83	-0.362076	0.106944	-3.38566	0.000710069	0.0204388
ENSG00000152413	HOMER1	84.4779	-0.820412	0.242527	-3.38276	0.000717603	0.0204787
ENSG00000155846	PPARGC1B	296.603	-0.479393	0.141691	-3.38337	0.000716031	0.0204787
ENSG00000164620	RELL2	391.667	-0.513969	0.151929	-3.38296	0.000717098	0.0204787
ENSG00000168350	DEGS2	479.382	0.430964	0.127458	3.38122	0.000721639	0.0205497
ENSG00000138107	ACTR1A	3159.16	-0.327958	0.0970654	-3.37873	0.000728208	0.0206923
ENSG00000067955	CBFB	1333.55	-0.375781	0.111245	-3.37796	0.000730263	0.0207064
ENSG00000135636	DYSF	233.305	-0.507333	0.15022	-3.37726	0.000732107	0.0207144
ENSG00000155111	CDK19	283.115	-0.551823	0.163521	-3.37463	0.000739141	0.0208689
ENSG00000115604	IL18R1	152.754	-0.584421	0.173503	-3.36836	0.00075616	0.0213041
ENSG00000151835	SACS	505.634	-0.437888	0.130326	-3.35993	0.00077961	0.0219183
ENSG00000161714	PLCD3	320.491	0.46559	0.138654	3.35793	0.00078529	0.0219848
ENSG00000189298	ZKSCAN3	118.657	0.644355	0.191873	3.35824	0.000784397	0.0219848
ENSG00000076248	UNG	2043.07	-0.418772	0.124809	-3.35529	0.00079282	0.0221489
ENSG00000153132	CLGN	31.9353	-1.20897	0.360684	-3.35187	0.000802669	0.0223769
ENSG00000096401	CDC5L	1444.46	0.344273	0.102782	3.34954	0.000809453	0.0224247
ENSG00000168298	HIST1H1E	60.6705	0.850382	0.253879	3.34955	0.000809419	0.0224247
ENSG00000131188	PRR7	295.975	-0.54955	0.164018	-3.35055	0.000806522	0.0224247
ENSG00000123091	RNF11	340.453	-0.478732	0.143006	-3.34763	0.000815053	0.0225328
ENSG00000019582	CD74	10874.4	0.330359	0.0987939	3.34392	0.000826033	0.0227416
ENSG00000187994	RINL	298.59	-0.5352	0.160026	-3.34446	0.000824422	0.0227416
ENSG00000185640	KRT79	132.516	-0.62811	0.187927	-3.34231	0.000830834	0.0228238
ENSG00000167700	MFSD3	421.425	-0.466707	0.139659	-3.34177	0.000832459	0.0228238
ENSG00000000457	SCYL3	227.87	0.547541	0.163887	3.34096	0.00083489	0.0228433
ENSG00000165997	ARL5B	311.766	0.496406	0.148665	3.3391	0.0008405	0.0229495
ENSG00000146278	PNRC1	898.312	0.401399	0.120283	3.33713	0.000846488	0.0230655
ENSG00000169508	GPR183	554.248	0.427886	0.128264	3.33597	0.000850013	0.0230892
ENSG00000177169	ULK1	793.531	0.447951	0.13429	3.3357	0.000850838	0.0230892
ENSG00000184232	OAF	717.853	-0.441803	0.132479	-3.33488	0.000853349	0.0231101
ENSG00000138363	ATIC	2930.46	-0.341536	0.102481	-3.33267	0.000860182	0.0232326
ENSG00000116741	RGS2	68.9083	0.890751	0.26731	3.33228	0.000861374	0.0232326
ENSG00000161960	EIF4A1	242.528	-0.63514	0.190765	-3.32944	0.000870219	0.0233386
ENSG00000186193	SAPCD2	725.996	-0.546259	0.164103	-3.32876	0.000872339	0.0233386
ENSG00000166822	TMEM170A	470.121	0.426264	0.128044	3.32905	0.000871419	0.0233386
ENSG00000196152	ZNF79	144.903	0.689703	0.207147	3.32954	0.000869901	0.0233386
ENSG00000171316	CHD7	907.537	-0.470249	0.141433	-3.3249	0.000884516	0.0236168
ENSG00000236871	LINC00106	28.7329	-1.19448	0.359397	-3.32357	0.000888719	0.0236813
ENSG00000163558	PRKCI	300.632	-0.489652	0.14747	-3.32034	0.000899076	0.0239093
ENSG00000145703	IQGAP2	1926.64	-0.4509	0.135976	-3.31604	0.000913031	0.0242318
ENSG00000200913	SNORD46	24.8247	-1.31016	0.395423	-3.3133	0.000922004	0.0243797
ENSG00000135913	USP37	466.944	0.421504	0.127219	3.31322	0.000922277	0.0243797
ENSG00000177888	ZBTB41	93.1646	0.681218	0.205665	3.31227	0.00092542	0.0244142
ENSG00000153395	LPCAT1	719.195	-0.411427	0.124235	-3.31169	0.000927339	0.0244162
ENSG00000168952	STXBP6	119.264	-0.639301	0.193157	-3.30974	0.000933811	0.024538
ENSG00000255587	RAB44	852.175	-0.37263	0.112644	-3.30804	0.000939528	0.0246394
ENSG00000136867	SLC31A2	253.283	0.578152	0.174827	3.30699	0.000943044	0.0246828
ENSG00000106348	IMPDH1	1081.97	-0.384892	0.116412	-3.3063	0.000945372	0.024685
ENSG00000135211	TMEM60	516.361	0.397237	0.120161	3.30586	0.000946847	0.024685
ENSG00000107281	NPDC1	697.313	-0.427188	0.129252	-3.30507	0.000949519	0.0247061
ENSG00000172586	CHCHD1	1134.61	-0.451119	0.136537	-3.30401	0.000953139	0.0247518
ENSG00000100916	BRMS1L	149.594	0.573973	0.173753	3.30339	0.000955221	0.0247574
ENSG00000136451	VEZF1	870.819	0.367004	0.111213	3.30001	0.00096681	0.0250089
ENSG00000166484	MAPK7	242.054	0.629212	0.191152	3.29169	0.000995863	0.0257103
ENSG00000144645	OSBPL10	20.9658	-1.46371	0.445275	-3.2872	0.00101189	0.0260228
ENSG00000179119	SPTY2D1	449.314	0.423723	0.128885	3.2876	0.00101045	0.0260228
ENSG00000163013	FBXO41	871.046	-0.397538	0.121053	-3.28399	0.00102349	0.0262195
ENSG00000123933	MXD4	1300.23	0.416597	0.126854	3.28407	0.00102319	0.0262195
ENSG00000174004	NRROS	1540.47	-0.473258	0.144284	-3.28004	0.00103793	0.0265383
ENSG00000175104	TRAF6	314.867	0.473024	0.144314	3.27774	0.00104641	0.0267035
ENSG00000243364	EFNA4	146.67	0.591134	0.180442	3.27603	0.00105276	0.0267628
ENSG00000132382	MYBBP1A	2320.34	-0.340601	0.103963	-3.27616	0.00105228	0.0267628
ENSG00000167220	HDHD2	239.845	-0.492663	0.15044	-3.27482	0.0010573	0.0268268
ENSG00000152926	ZNF117	344.634	0.515078	0.15735	3.27346	0.00106241	0.026905
ENSG00000187210	GCNT1	1441.21	0.360022	0.110054	3.27132	0.00107047	0.0270575
ENSG00000087903	RFX2	542.516	-0.412853	0.126251	-3.2701	0.00107511	0.027123
ENSG00000198863	RUNDC1	696.396	0.429465	0.131402	3.26833	0.00108184	0.0272411
ENSG00000171469	ZNF561	333.27	0.483234	0.147996	3.26517	0.00109397	0.0274943
ENSG00000138802	SEC24B	444.189	0.422405	0.129452	3.26301	0.00110235	0.0276526
ENSG00000133134	BEX2	71.6789	-0.873202	0.267751	-3.26125	0.00110923	0.0277203
ENSG00000166925	TSC22D4	1096.7	-0.409389	0.125515	-3.26168	0.00110755	0.0277203
ENSG00000183864	TOB2	857.912	0.437573	0.134248	3.25945	0.0011163	0.0278444
ENSG00000274750	HIST1H3E	30.6334	1.13887	0.34961	3.25755	0.00112379	0.0279787
ENSG00000173218	VANGL1	586.393	0.427447	0.131243	3.25692	0.00112627	0.0279879
ENSG00000123444	KBTBD4	762.981	0.393902	0.121021	3.25483	0.00113462	0.0281427
ENSG00000179335	CLK3	1504.86	0.365992	0.112627	3.24959	0.00115572	0.0286126
ENSG00000198223	CSF2RA	1470.63	0.331017	0.101917	3.24791	0.00116257	0.0286753
ENSG00000090339	ICAM1	464.444	0.40407	0.124407	3.24796	0.00116234	0.0286753
ENSG00000100104	SRRD	656.833	-0.37296	0.114877	-3.2466	0.00116794	0.0287544
ENSG00000198954	KIF1BP	207.94	0.636038	0.195968	3.24562	0.00117197	0.0287638
ENSG00000104490	NCALD	82.8143	-0.718096	0.221263	-3.24545	0.00117266	0.0287638
ENSG00000106541	AGR2	162.824	0.543329	0.167556	3.24267	0.00118416	0.0289923
ENSG00000101166	PRELID3B	1043.85	0.396277	0.122263	3.24118	0.00119036	0.0290904
ENSG00000148690	FRA10AC1	499.509	-0.450644	0.139129	-3.23904	0.00119935	0.0292562
ENSG00000113456	RAD1	814.599	-0.369254	0.114106	-3.23606	0.00121192	0.0295085
ENSG00000091483	FH	2338.78	-0.350541	0.108354	-3.23514	0.00121582	0.0295492
ENSG00000275111	ZNF2	62.3086	0.889697	0.275079	3.23434	0.00121926	0.0295787
ENSG00000170653	ATF7	387.377	0.465344	0.144089	3.22956	0.00123979	0.0299672
ENSG00000145868	FBXO38	523.252	0.461088	0.142764	3.22972	0.00123911	0.0299672
ENSG00000160593	JAML	932.357	-0.388799	0.120427	-3.2285	0.00124441	0.0300243
ENSG00000171241	SHCBP1	1014.95	0.382907	0.118738	3.2248	0.00126059	0.0303593
ENSG00000116962	NID1	72.257	0.777232	0.2413	3.22102	0.00127735	0.0307072
ENSG00000005812	FBXL3	599.841	0.438732	0.136643	3.21079	0.00132372	0.0317646
ENSG00000151131	C12orf45	574.896	-0.413187	0.128739	-3.2095	0.00132966	0.031846
ENSG00000273084	RP11-1275H24.3	186.845	-0.584851	0.182253	-3.20901	0.00133192	0.031846
ENSG00000160360	GPSM1	592.564	-0.485696	0.1514	-3.20804	0.00133644	0.0318967
ENSG00000120539	MASTL	420.661	0.492674	0.153639	3.2067	0.00134267	0.0319613
ENSG00000090905	TNRC6A	1166.25	0.425304	0.132641	3.20642	0.00134396	0.0319613
ENSG00000011422	PLAUR	1032.71	0.371713	0.116187	3.19926	0.00137782	0.0327078
ENSG00000164172	MOCS2	305.284	-0.448083	0.14011	-3.19809	0.00138341	0.0327819
ENSG00000013503	POLR3B	257.751	0.48375	0.151372	3.19576	0.00139463	0.0329889
ENSG00000157450	RNF111	308.372	0.483461	0.151401	3.19325	0.00140679	0.0332172
ENSG00000183527	PSMG1	1690.23	-0.333177	0.104391	-3.19162	0.00141476	0.033346
ENSG00000160172	FAM86C2P	61.7672	-0.794949	0.249148	-3.19067	0.00141942	0.0333968
ENSG00000162384	C1orf123	917.019	-0.385956	0.121095	-3.18723	0.00143642	0.0335651
ENSG00000183283	DAZAP2	4437.31	-0.316368	0.099263	-3.18717	0.0014367	0.0335651
ENSG00000114805	PLCH1	299.779	-0.508945	0.159642	-3.18805	0.00143238	0.0335651
ENSG00000196363	WDR5	2322.85	-0.38522	0.120849	-3.18761	0.00143456	0.0335651
ENSG00000074582	BCS1L	1044.4	-0.389868	0.122507	-3.18242	0.00146049	0.0340611
ENSG00000158106	RHPN1	741.701	-0.475391	0.14951	-3.17965	0.00147452	0.0343279
ENSG00000119986	AVPI1	188.476	0.551997	0.173665	3.17852	0.0014803	0.034402
ENSG00000085733	CTTN	338.008	0.43651	0.137465	3.17544	0.00149612	0.0345996
ENSG00000106692	FKTN	225.331	-0.53963	0.169892	-3.17631	0.00149162	0.0345996
ENSG00000178951	ZBTB7A	2677.91	0.437963	0.137926	3.17534	0.00149662	0.0345996
ENSG00000137947	GTF2B	849.016	0.377932	0.119072	3.17399	0.00150361	0.0346457
ENSG00000131779	PEX11B	346.615	-0.444255	0.13997	-3.17394	0.00150384	0.0346457
ENSG00000162607	USP1	2147.61	-0.368135	0.116006	-3.17342	0.00150655	0.034648
ENSG00000136159	NUDT15	770.116	0.450159	0.142076	3.16843	0.00153262	0.0351867
ENSG00000165507	C10orf10	31.985	1.05788	0.334249	3.16496	0.00155107	0.0354608
ENSG00000143079	CTTNBP2NL	143.708	0.553359	0.174829	3.16515	0.00155003	0.0354608
ENSG00000131171	SH3BGRL	2091.67	0.351722	0.11114	3.16467	0.00155258	0.0354608
ENSG00000117724	CENPF	1487.57	-0.388669	0.122855	-3.16363	0.00155814	0.0355267
ENSG00000198799	LRIG2	242.604	0.502794	0.15901	3.16203	0.00156675	0.0356617
ENSG00000166126	AMN	116.592	-0.653522	0.206759	-3.16079	0.0015734	0.0356951
ENSG00000171791	BCL2	1341.9	-0.332168	0.105108	-3.16026	0.00157629	0.0356951
ENSG00000136715	SAP130	752.334	0.424677	0.134372	3.16047	0.00157517	0.0356951
ENSG00000134107	BHLHE40	860.449	0.376074	0.119083	3.15809	0.00158809	0.0357792
ENSG00000076321	KLHL20	187.007	0.500706	0.158532	3.15839	0.00158641	0.0357792
ENSG00000090104	RGS1	41.6975	1.00247	0.317337	3.15902	0.00158301	0.0357792
ENSG00000196126	HLA-DRB1	2160.15	0.394091	0.124864	3.15615	0.00159866	0.0357814
ENSG00000090263	MRPS33	476.124	-0.427026	0.135302	-3.15609	0.00159897	0.0357814
ENSG00000177058	SLC38A9	226.783	-0.531725	0.168472	-3.15617	0.00159855	0.0357814
ENSG00000124214	STAU1	1593.59	0.427797	0.135538	3.15629	0.0015979	0.0357814
ENSG00000174695	TMEM167A	1238.03	0.354727	0.112502	3.15308	0.00161557	0.036092
ENSG00000196943	NOP9	1297.55	-0.399773	0.126833	-3.15195	0.00162182	0.0361707
ENSG00000181026	AEN	1352.38	-0.32638	0.103605	-3.15023	0.00163143	0.036324
ENSG00000172086	KRCC1	206.665	0.519959	0.165162	3.14818	0.0016429	0.0365066
ENSG00000091490	SEL1L3	277.189	0.557166	0.177003	3.14778	0.00164513	0.0365066
ENSG00000099246	RAB18	777.143	0.379873	0.120762	3.14564	0.00165726	0.0367144
ENSG00000165030	NFIL3	325.044	0.499749	0.158902	3.14501	0.00166079	0.036725
ENSG00000109917	ZPR1	1710.27	-0.326129	0.103712	-3.14458	0.00166328	0.036725
ENSG00000105926	MPP6	185.754	-0.502498	0.159846	-3.14364	0.00166863	0.0367818
ENSG00000155329	ZCCHC10	570.035	0.371543	0.118221	3.14279	0.00167345	0.0368269
ENSG00000182841	RRP7BP	487.8	-0.503482	0.160262	-3.14162	0.00168016	0.0369135
ENSG00000153179	RASSF3	523.013	-0.386972	0.123205	-3.14088	0.0016844	0.0369454
ENSG00000118515	SGK1	102.187	0.815916	0.259822	3.14028	0.00168785	0.03696
ENSG00000184113	CLDN5	67.7088	-0.796955	0.253969	-3.138	0.00170104	0.0371874
ENSG00000107669	ATE1	269.437	-0.49192	0.156848	-3.13629	0.00171098	0.0372613
ENSG00000163661	PTX3	185.02	0.53449	0.170464	3.13549	0.00171565	0.0372613
ENSG00000080608	PUM3	1434.25	-0.336414	0.107283	-3.13576	0.0017141	0.0372613
ENSG00000133874	RNF122	126.482	0.57752	0.184135	3.1364	0.00171035	0.0372613
ENSG00000256006	AC084117.3	24.03	-1.294	0.412984	-3.1333	0.00172854	0.0373731
ENSG00000117877	CD3EAP	503.573	-0.552694	0.176481	-3.13175	0.00173769	0.0373731
ENSG00000055211	GINM1	684.36	0.395919	0.12638	3.13276	0.00173171	0.0373731
ENSG00000188786	MTF1	597.797	0.407802	0.130189	3.13238	0.00173393	0.0373731
ENSG00000170364	SETMAR	491.723	-0.385523	0.123092	-3.13199	0.00173627	0.0373731
ENSG00000278318	ZNF229	55.1279	0.811545	0.259093	3.13225	0.00173471	0.0373731
ENSG00000112742	TTK	377.711	0.422437	0.135095	3.12696	0.00176627	0.0379261
ENSG00000064703	DDX20	502.5	0.416838	0.133393	3.12489	0.00177874	0.0381322
ENSG00000269446	RP4-639J15.3	109.132	0.604141	0.193395	3.12387	0.00178488	0.0382022
ENSG00000168036	CTNNB1	3641.28	0.330865	0.105976	3.12207	0.00179582	0.0383744
ENSG00000204839	MROH6	200.737	-0.517454	0.165849	-3.12004	0.00180827	0.0385785
ENSG00000151136	BTBD11	157.391	0.54635	0.175234	3.11783	0.00182186	0.0386818
ENSG00000104951	IL4I1	29.838	1.09796	0.352117	3.11817	0.00181981	0.0386818
ENSG00000067221	STOML1	132.788	-0.57775	0.185261	-3.11857	0.00181729	0.0386818
ENSG00000176148	TCP11L1	338.942	0.450863	0.144641	3.11712	0.00182625	0.0387131
ENSG00000172888	ZNF621	320.746	-0.474144	0.15231	-3.11301	0.00185191	0.0391944
ENSG00000165660	FAM175B	521.128	0.403342	0.129596	3.1123	0.00185637	0.0392262
ENSG00000172819	RARG	379.571	0.464531	0.149322	3.11092	0.00186504	0.0393468
ENSG00000115170	ACVR1	261.162	0.52091	0.167482	3.11025	0.00186931	0.0393743
ENSG00000136444	RSAD1	974.07	-0.342087	0.110028	-3.1091	0.00187658	0.0394023
ENSG00000159459	UBR1	216.537	-0.525479	0.169002	-3.10931	0.00187525	0.0394023
ENSG00000286138		21.0181	-1.32797	0.427356	-3.10742	0.0018873	0.0395647
ENSG00000143771	CNIH4	527.194	0.37011	0.119188	3.10527	0.00190107	0.039708
ENSG00000204257	HLA-DMA	830.374	0.352571	0.113551	3.10495	0.00190311	0.039708
ENSG00000133606	MKRN1	1215.38	0.392623	0.126443	3.10513	0.00190194	0.039708
ENSG00000118855	MFSD1	2345.63	-0.383534	0.123583	-3.10345	0.00191279	0.0398473
ENSG00000104613	INTS10	1610.24	-0.311787	0.100681	-3.09679	0.00195629	0.0405036
ENSG00000188566	NDOR1	467.864	-0.385806	0.124575	-3.09697	0.00195508	0.0405036
ENSG00000165646	SLC18A2	25.048	-1.17538	0.379552	-3.09676	0.0019565	0.0405036
ENSG00000078269	SYNJ2	1143.08	0.335276	0.108236	3.09762	0.00195079	0.0405036
ENSG00000116544	DLGAP3	75.3289	-0.774842	0.250446	-3.09385	0.00197574	0.0408381
ENSG00000116017	ARID3A	1356.08	0.425567	0.137621	3.09232	0.00198596	0.0408585
ENSG00000183688	FAM101B	4546.32	-0.318479	0.102985	-3.09248	0.00198489	0.0408585
ENSG00000068831	RASGRP2	1562.98	-0.402036	0.129976	-3.09316	0.00198038	0.0408585
ENSG00000135776	ABCB10	473.88	-0.447202	0.144733	-3.08985	0.0020026	0.0410733
ENSG00000152503	TRIM36	54.7257	0.839437	0.271637	3.09029	0.00199961	0.0410733
ENSG00000152944	MED21	389.908	0.41088	0.133013	3.08903	0.00200811	0.0411229
ENSG00000149499	EML3	1582.05	-0.42737	0.13838	-3.08837	0.0020126	0.0411513
ENSG00000168906	MAT2A	5630.16	-0.415997	0.134721	-3.08783	0.00201622	0.0411619
ENSG00000161021	MAML1	921.576	0.460178	0.149168	3.08497	0.00203574	0.0414966
ENSG00000160570	DEDD2	648.763	0.406323	0.131769	3.08359	0.00204517	0.0416248
ENSG00000124571	XPO5	1832.2	-0.332402	0.107815	-3.08309	0.00204864	0.0416317
ENSG00000008282	SYPL1	836.183	-0.371736	0.120615	-3.08202	0.00205604	0.0417182
ENSG00000230453	ANKRD18B	636.516	-0.390003	0.126632	-3.07982	0.00207123	0.0417764
ENSG00000169083	AR	39.1875	0.927137	0.301128	3.07888	0.0020778	0.0417764
ENSG00000126775	ATG14	343.898	0.454127	0.147427	3.08034	0.00206761	0.0417764
ENSG00000173852	DPY19L1	158.975	-0.556804	0.180803	-3.07962	0.00207265	0.0417764
ENSG00000163554	SPTA1	61.427	0.772449	0.250741	3.08067	0.00206536	0.0417764
ENSG00000213588	ZBTB9	179.992	0.668167	0.217005	3.07904	0.00207666	0.0417764
ENSG00000139324	TMTC3	118.757	0.588716	0.191281	3.07775	0.00208568	0.0418715
ENSG00000151413	NUBPL	141.807	-0.566897	0.18423	-3.07713	0.00209007	0.0418962
ENSG00000174721	FGFBP3	198.403	-0.618595	0.201345	-3.07231	0.00212411	0.0425142
ENSG00000211455	STK38L	440.011	0.407823	0.132797	3.07102	0.00213328	0.0425693
ENSG00000160446	ZDHHC12	1286.21	0.335103	0.109117	3.07103	0.00213322	0.0425693
ENSG00000136492	BRIP1	393.386	0.430256	0.140145	3.07008	0.00213998	0.042575
ENSG00000140259	MFAP1	1449.2	0.315811	0.102864	3.07018	0.00213932	0.042575
ENSG00000170854	MINA	415.369	-0.439668	0.143288	-3.06842	0.00215194	0.0427489
ENSG00000071537	SEL1L	809.359	-0.406946	0.132892	-3.06224	0.00219686	0.0435761
ENSG00000101849	TBL1X	238.981	-0.46782	0.152905	-3.05955	0.00221667	0.0439034
ENSG00000072818	ACAP1	2173.05	-0.441606	0.144381	-3.05861	0.00222364	0.0439758
ENSG00000162063	CCNF	865.924	0.394467	0.129032	3.05714	0.00223462	0.0440614
ENSG00000276168	RN7SL1	2195.6	0.524759	0.171629	3.05752	0.00223177	0.0440614
ENSG00000151690	MFSD6	88.7017	-0.645429	0.211229	-3.05559	0.00224619	0.0442239
ENSG00000111711	GOLT1B	569.764	0.392134	0.128355	3.05508	0.00225001	0.0442336
ENSG00000160710	ADAR	3213.05	-0.34479	0.112892	-3.05417	0.00225684	0.0443023
ENSG00000078902	TOLLIP	1576.97	0.322557	0.105636	3.05349	0.00226196	0.0443371
ENSG00000100292	HMOX1	101.146	0.616222	0.201907	3.05202	0.0022731	0.0444897
ENSG00000151806	GUF1	527.453	-0.412719	0.135303	-3.05034	0.00228583	0.044673
ENSG00000010610	CD4	1551.79	0.377061	0.123694	3.04832	0.00230122	0.0448417
ENSG00000196405	EVL	2338.76	-0.305702	0.100274	-3.04867	0.00229854	0.0448417
ENSG00000196911	KPNA5	271.406	0.486056	0.159637	3.04477	0.0023286	0.0453087
ENSG00000136856	SLC2A8	135.937	-0.549813	0.180674	-3.04312	0.00234142	0.0454914
ENSG00000183161	FANCF	249.727	0.456192	0.149966	3.04198	0.00235028	0.0455303
ENSG00000188033	ZNF490	78.6854	0.663064	0.217962	3.04211	0.00234927	0.0455303
ENSG00000142207	URB1	972.524	-0.358403	0.117854	-3.04107	0.0023574	0.0456017
ENSG00000136040	PLXNC1	339.754	0.454927	0.149672	3.03949	0.00236982	0.0457751
ENSG00000168826	ZBTB49	84.4901	0.663853	0.218673	3.03582	0.00239883	0.0462682
ENSG00000183605	SFXN4	1089.13	-0.3404	0.112162	-3.0349	0.00240612	0.0463414
ENSG00000149308	NPAT	212.203	0.511739	0.168693	3.03356	0.00241685	0.0464806
ENSG00000086848	ALG9	91.1476	0.686902	0.226568	3.03177	0.00243125	0.0466898
ENSG00000011638	TMEM159	367.355	0.411064	0.135657	3.03017	0.00244412	0.0468692
ENSG00000017797	RALBP1	2508.98	-0.343739	0.113473	-3.02926	0.0024515	0.0469428
ENSG00000187808	SOWAHD	89.9352	0.639112	0.211081	3.02781	0.00246333	0.0471014
ENSG00000155393	HEATR3	496.3	-0.451852	0.149265	-3.02718	0.00246849	0.0471321
ENSG00000269858	EGLN2	121.509	-0.583929	0.193025	-3.02514	0.0024852	0.047383
ENSG00000213903	LTB4R	443.681	-0.392866	0.129893	-3.02455	0.00249006	0.0474075
ENSG00000120549	KIAA1217	66.535	0.713584	0.236025	3.02334	0.00249998	0.0475282
ENSG00000170540	ARL6IP1	3019.8	0.403773	0.133707	3.01984	0.0025291	0.0478079
ENSG00000173226	IQCB1	738.756	-0.388932	0.128783	-3.02006	0.00252724	0.0478079
ENSG00000156675	RAB11FIP1	1462.06	0.320953	0.106259	3.02048	0.00252376	0.0478079
ENSG00000052749	RRP12	2080.73	-0.381633	0.126374	-3.01986	0.00252887	0.0478079
ENSG00000104738	MCM4	6031.14	-0.290133	0.0961074	-3.01884	0.00253743	0.0478972
ENSG00000112874	NUDT12	157.186	0.60316	0.199873	3.01771	0.00254694	0.0480085
ENSG00000198517	MAFK	319.91	-0.45326	0.150289	-3.01593	0.00256195	0.0482228
ENSG00000175305	CCNE2	428.936	0.435068	0.144284	3.01535	0.00256682	0.0482459
ENSG00000160818	GPATCH4	2374.72	-0.513753	0.170438	-3.01432	0.00257559	0.0483423
ENSG00000182568	SATB1	2309.29	-0.36676	0.121785	-3.01153	0.00259932	0.0487051
ENSG00000221539	SNORD99	22.0172	-1.23316	0.409524	-3.01119	0.00260225	0.0487051
ENSG00000261236	BOP 1.00	4249.56	-0.47176	0.15713	-3.00235	0.00267903	0.0500714
ENSG00000100632	ERH	3730.74	-0.295791	0.0985615	-3.00108	0.0026902	0.0502096
ENSG00000182446	NPLOC4	3136.43	-0.290931	0.0969809	-2.99988	0.00270089	0.050324
ENSG00000269951	RP11-797A18.6	43.2589	-0.938654	0.312952	-2.99935	0.00270552	0.050324
ENSG00000184292	TACSTD2	103.651	-0.758223	0.252816	-2.99911	0.00270771	0.050324
ENSG00000242125	SNHG3	3888.66	-0.323904	0.108033	-2.9982	0.00271578	0.0504033
ENSG00000134256	CD101	206.321	0.471771	0.157464	2.99604	0.00273506	0.0504789
ENSG00000198502	HLA-DRB5	436.802	0.427655	0.142735	2.99615	0.00273416	0.0504789
ENSG00000124688	MAD2L1BP	573.559	0.444475	0.148305	2.99702	0.00272629	0.0504789
ENSG00000235109	ZSCAN31	79.5663	0.667329	0.222713	2.99637	0.00273217	0.0504789
ENSG00000013441	CLK1	1038.13	0.352921	0.117836	2.99503	0.00274421	0.0505773
ENSG00000177425	PAWR	500.976	-0.373955	0.124976	-2.99221	0.00276963	0.050975
ENSG00000119523	ALG2	476.737	0.39795	0.133048	2.99102	0.00278043	0.05108
ENSG00000141646	SMAD4	829.735	0.359901	0.120339	2.99074	0.00278303	0.05108
ENSG00000168329	CX3CR1	71.0566	0.680015	0.227571	2.98814	0.00280681	0.0514452
ENSG00000262001	DLGAP1-AS2	49.05	-0.812312	0.271986	-2.98659	0.00282106	0.051564
ENSG00000108064	TFAM	1011.95	-0.324723	0.108721	-2.98675	0.00281965	0.051564
ENSG00000186907	RTN4RL2	359.923	-0.434468	0.145599	-2.98401	0.00284494	0.051929
ENSG00000118971	CCND2	3319.43	-0.348004	0.116713	-2.9817	0.00286655	0.0519834
ENSG00000153187	HNRNPU	12583.2	-0.300293	0.100716	-2.98159	0.00286751	0.0519834
ENSG00000176018	LYSMD3	208.382	0.487338	0.163423	2.98206	0.00286313	0.0519834
ENSG00000110841	PPFIBP1	585.792	-0.412748	0.138402	-2.98225	0.00286143	0.0519834
ENSG00000138760	SCARB2	711.845	0.390318	0.130872	2.98245	0.00285956	0.0519834
ENSG00000025796	SEC63	1812.26	-0.308677	0.103587	-2.97989	0.00288351	0.0522021
ENSG00000110172	CHORDC1	629.819	-0.409467	0.137553	-2.9768	0.00291279	0.0526603
ENSG00000050327	ARHGEF5	83.9715	0.651357	0.218872	2.97597	0.00292061	0.05273
ENSG00000225190	PLEKHM1	569.918	0.392425	0.131995	2.97302	0.00294882	0.0529226
ENSG00000078804	TP53INP2	67.6188	0.718149	0.241552	2.97307	0.0029484	0.0529226
ENSG00000128159	TUBGCP6	663.907	-0.353235	0.118767	-2.97417	0.00293783	0.0529226
ENSG00000157954	WIPI2	1221.08	0.339435	0.114181	2.97277	0.00295122	0.0529226
ENSG00000171307	ZDHHC16	764.705	-0.343225	0.115449	-2.97296	0.00294943	0.0529226
ENSG00000173276	ZBTB21	213.198	0.50784	0.170942	2.97083	0.00296998	0.0531872
ENSG00000105376	ICAM5	330.101	-0.464283	0.156312	-2.97023	0.00297574	0.0532185
ENSG00000174007	CEP19	263.792	0.420149	0.141523	2.96876	0.00299002	0.0533264
ENSG00000155368	DBI	2104.24	0.314539	0.105993	2.96755	0.00300187	0.0533264
ENSG00000102531	FNDC3A	270.118	0.466336	0.157077	2.96885	0.00298921	0.0533264
ENSG00000143353	LYPLAL1	201.05	-0.469239	0.158123	-2.96756	0.00300177	0.0533264
ENSG00000168994	PXDC1	127.592	0.538272	0.18137	2.96782	0.00299923	0.0533264
ENSG00000198707	CEP290	424.97	-0.435477	0.146812	-2.96622	0.00301489	0.0534147
ENSG00000105991	HOXA1	36.2032	0.950363	0.320382	2.96635	0.00301359	0.0534147
ENSG00000119965	C10orf88	111.463	0.571556	0.192823	2.96415	0.00303516	0.0537021
ENSG00000137413	TAF8	869.264	0.345072	0.116448	2.96332	0.00304343	0.0537768
ENSG00000122203	KIAA1191	625.886	0.405034	0.136729	2.96231	0.00305339	0.053881
ENSG00000104763	ASAH1	1383.87	0.315939	0.106719	2.96046	0.00307182	0.0540641
ENSG00000153774	CFDP1	838.973	-0.338692	0.11445	-2.9593	0.00308339	0.0540641
ENSG00000127946	HIP1	4938.19	-0.328389	0.110943	-2.95998	0.00307655	0.0540641
ENSG00000132330	SCLY	70.8257	-0.701264	0.236931	-2.95978	0.00307858	0.0540641
ENSG00000151239	TWF1	243.163	0.495525	0.167451	2.95923	0.00308414	0.0540641
ENSG00000115946	PNO1	688.023	-0.336851	0.11385	-2.95872	0.00308919	0.0540812
ENSG00000180448	ARHGAP45	5171.93	-0.372152	0.125836	-2.95744	0.00310201	0.0541628
ENSG00000269929	RP11-2B6.2	129.617	-0.576504	0.194913	-2.95775	0.00309891	0.0541628
ENSG00000064651	SLC12A2	259.624	-0.443841	0.150159	-2.95581	0.00311849	0.0543789
ENSG00000143119	CD53	1678.75	0.355062	0.120158	2.95497	0.00312696	0.0544551
ENSG00000269028	MTRNR2L12	216.094	0.465419	0.15767	2.95186	0.00315865	0.0549321
ENSG00000152454	ZNF256	249.859	-0.462663	0.156757	-2.95147	0.00316263	0.0549321
ENSG00000143756	FBXO28	280.202	-0.440828	0.149388	-2.9509	0.00316854	0.0549628
ENSG00000101307	SIRPB1	564.719	0.359661	0.121912	2.95018	0.0031759	0.0550185
ENSG00000238578	SNORD4A	139.566	-0.561259	0.190291	-2.94948	0.00318309	0.0550713
ENSG00000247315	ZCCHC3	1445.17	0.348438	0.118157	2.94893	0.0031888	0.0550981
ENSG00000217128	FNIP1	428.018	0.444914	0.150972	2.947	0.00320877	0.0553712
ENSG00000169220	RGS14	1798.94	0.340951	0.115712	2.94656	0.00321333	0.0553777
ENSG00000134333	LDHA	13823	-0.293821	0.0997411	-2.94584	0.00322077	0.055434
ENSG00000111664	GNB3	43.5636	-0.870294	0.295539	-2.94477	0.00323199	0.055555
ENSG00000197019	SERTAD1	543.105	0.389626	0.13234	2.94414	0.00323857	0.0555952
ENSG00000186827	TNFRSF4	207.956	-0.561351	0.190693	-2.94374	0.00324271	0.0555952
ENSG00000258405	ZNF578	29.5406	0.987427	0.335521	2.94297	0.00325084	0.0556628
ENSG00000139613	SMARCC2	1795.95	-0.357648	0.12158	-2.94166	0.00326456	0.0558257
ENSG00000178038	ALS2CL	33.2968	-1.00961	0.343318	-2.94075	0.00327418	0.0559181
ENSG00000160563	MED27	756.274	-0.349184	0.118759	-2.94028	0.00327913	0.0559307
ENSG00000002587	HS3ST1	315.275	0.424397	0.144402	2.939	0.0032927	0.0560813
ENSG00000213281	NRAS	853.686	-0.401526	0.136636	-2.93865	0.00329641	0.0560813
ENSG00000229140	CCDC26	317.163	-0.407273	0.138641	-2.93761	0.00330752	0.056188
ENSG00000198721	ECI2	1165.18	-0.318316	0.108371	-2.93727	0.00331115	0.056188
ENSG00000053372	MRTO4	4485.9	-0.342267	0.116551	-2.93662	0.00331815	0.0562347
ENSG00000185818	NAT8L	211.539	-0.622917	0.212161	-2.93606	0.00332414	0.0562645
ENSG00000170779	CDCA4	1192.06	0.330515	0.112657	2.93381	0.00334832	0.0565227
ENSG00000132002	DNAJB1	1897.99	0.353569	0.120521	2.93368	0.00334969	0.0565227
ENSG00000165650	PDZD8	473.211	-0.419105	0.142871	-2.93345	0.00335217	0.0565227
ENSG00000132664	POLR3F	226.725	-0.479784	0.163581	-2.933	0.00335704	0.0565328
ENSG00000170633	RNF34	1029.58	0.370082	0.126223	2.93197	0.00336816	0.0566483
ENSG00000182512	GLRX5	1453.8	-0.341672	0.116605	-2.93016	0.00338789	0.0568684
ENSG00000160584	SIK3	592.988	0.36233	0.123663	2.92998	0.00338982	0.0568684
ENSG00000124145	SDC4	351.282	0.405981	0.138588	2.92941	0.00339602	0.0569005
ENSG00000267296	CEBPA-AS1	173.867	-0.555952	0.189925	-2.92721	0.00342014	0.0572324
ENSG00000159882	ZNF230	107.138	0.571637	0.195375	2.92584	0.0034353	0.0574136
ENSG00000172893	DHCR7	1548.12	0.395308	0.135163	2.92467	0.00344821	0.0575474
ENSG00000116679	IVNS1ABP	984.062	-0.369006	0.126185	-2.92433	0.00345198	0.0575474
ENSG00000261373	VPS9D1-AS1	135.639	-0.561963	0.192266	-2.92284	0.00346859	0.0577519
ENSG00000117335	CD46	1783.41	-0.374672	0.128237	-2.92172	0.003481	0.0578045
ENSG00000090565	RAB11FIP3	714.466	-0.440589	0.150815	-2.92138	0.0034848	0.0578045
ENSG00000179262	RAD23A	2951.71	-0.292049	0.0999695	-2.92138	0.00348482	0.0578045
ENSG00000187514	PTMA	67426	-0.313029	0.107277	-2.91794	0.00352356	0.058374
ENSG00000225138	CTD-2228K2.7	139.993	-0.568666	0.194996	-2.9163	0.00354213	0.0586086
ENSG00000249592	RP11-440L14.1	63.1172	-0.771074	0.264483	-2.9154	0.00355229	0.0587035
ENSG00000172840	PDP2	499.805	0.382275	0.13116	2.91456	0.00356188	0.0587888
ENSG00000109534	GAR1	1320.73	-0.373771	0.128396	-2.91108	0.00360186	0.0593747
ENSG00000187446	CHP1	1665.8	0.339336	0.116638	2.9093	0.00362234	0.0596383
ENSG00000143515	ATP8B2	602.198	-0.374979	0.12905	-2.90569	0.00366448	0.0602417
ENSG00000138942	RNF185	448.971	0.36327	0.125034	2.90538	0.00366807	0.0602417
ENSG00000096060	FKBP5	3503.6	-0.341478	0.117598	-2.90376	0.00368708	0.0604199
ENSG00000154814	OXNAD1	329.132	-0.421567	0.145184	-2.90368	0.00368803	0.0604199
ENSG00000136717	BIN1	925.012	-0.413229	0.14235	-2.90292	0.00369706	0.0604932
ENSG00000196455	PIK3R4	381.076	0.390885	0.134755	2.90071	0.00372312	0.0608447
ENSG00000204315	FKBPL	170.853	0.537741	0.185463	2.89946	0.00373809	0.0609391
ENSG00000073008	PVR	837.787	-0.344808	0.118913	-2.89967	0.00373557	0.0609391
ENSG00000064300	NGFR	117.094	-0.58669	0.202447	-2.898	0.00375554	0.0610757
ENSG00000165689	SDCCAG3	1322.04	-0.318448	0.109886	-2.89799	0.00375567	0.0610757
ENSG00000100413	POLR3H	1261.18	-0.357755	0.123528	-2.89615	0.00377771	0.0613589
ENSG00000111581	NUP107	1293.4	-0.331368	0.114504	-2.89394	0.00380442	0.0616418
ENSG00000179598	PLD6	72.4333	-0.68717	0.237443	-2.89405	0.00380312	0.0616418
ENSG00000143363	PRUNE1	285.846	0.509908	0.176307	2.89215	0.0038261	0.0619175
ENSG00000124608	AARS2	781.475	-0.346847	0.119975	-2.891	0.0038402	0.06207
ENSG00000115484	CCT4	9863.36	-0.290429	0.1005	-2.88983	0.00385456	0.0622262
ENSG00000103253	HAGHL	275.351	-0.579516	0.200625	-2.88855	0.00387018	0.0622513
ENSG00000114698	PLSCR4	53.5198	0.788164	0.272814	2.88902	0.00386444	0.0622513
ENSG00000181284	TMEM102	271.256	0.445633	0.15426	2.88884	0.00386661	0.0622513
ENSG00000163249	CCNYL1	491.122	0.394603	0.136721	2.88618	0.00389944	0.0626459
ENSG00000196839	ADA	4744	0.301603	0.104558	2.88454	0.00391986	0.0628978
ENSG00000143842	SOX13	80.0791	0.655891	0.227522	2.88276	0.00394202	0.063177
ENSG00000104899	AMH	60.8489	-0.8005	0.277813	-2.88144	0.00395864	0.0633669
ENSG00000055208	TAB2	561.293	0.369721	0.128379	2.87991	0.00397784	0.0635974
ENSG00000080822	CLDND1	364.65	0.458428	0.159272	2.87827	0.00399865	0.0638534
ENSG00000185033	SEMA4B	255.081	0.416893	0.14491	2.87692	0.00401584	0.0640507
ENSG00000173145	NOC3L	246.353	-0.429238	0.14935	-2.87405	0.0040525	0.0644032
ENSG00000090054	SPTLC1	1030.06	0.361697	0.125837	2.87433	0.00404885	0.0644032
ENSG00000119801	YPEL5	1536.87	0.332715	0.115742	2.87463	0.00404505	0.0644032
ENSG00000183723	CMTM4	319.418	0.389519	0.135678	2.8709	0.00409301	0.0649693
ENSG00000062598	ELMO2	695.185	0.400744	0.139614	2.87037	0.00409986	0.0650002
ENSG00000168734	PKIG	394.677	0.4012	0.139928	2.86719	0.00414136	0.0655797
ENSG00000206418	RAB12	218.914	0.489649	0.170874	2.86557	0.00416264	0.0658382
ENSG00000143226	FCGR2A	2054.7	0.294815	0.10294	2.86394	0.00418403	0.0660977
ENSG00000153767	GTF2E1	375.477	0.425585	0.148661	2.86278	0.00419941	0.0662617
ENSG00000155096	AZIN1	1806.73	-0.367382	0.128353	-2.86228	0.00420602	0.0662872
ENSG00000146833	TRIM4	270.343	0.511468	0.178792	2.86069	0.00422719	0.0665418
ENSG00000101445	PPP1R16B	607.375	0.385983	0.134991	2.85932	0.00424554	0.0666983
ENSG00000101654	RNMT	696.404	-0.364925	0.127632	-2.85919	0.00424718	0.0666983
ENSG00000152382	TADA1	398.914	0.421207	0.147449	2.85664	0.00428155	0.0671586
ENSG00000159228	CBR1	352.506	-0.409246	0.143287	-2.85612	0.00428847	0.0671877
ENSG00000164603	BMT2	101.012	-0.581733	0.203935	-2.85254	0.0043371	0.0678695
ENSG00000100065	CARD10	58.0103	0.735095	0.257748	2.85199	0.00434465	0.0679076
ENSG00000197956	S100A6	3874.53	0.33603	0.117949	2.84895	0.00438635	0.0684786
ENSG00000100055	CYTH4	2613.69	0.329902	0.115872	2.84712	0.00441163	0.0687924
ENSG00000104856	RELB	733.862	0.395756	0.139035	2.84645	0.00442098	0.0688572
ENSG00000107404	DVL1	905.267	-0.418721	0.147238	-2.84385	0.00445726	0.0691849
ENSG00000067177	PHKA1	138.518	-0.512034	0.18002	-2.84432	0.00445058	0.0691849
ENSG00000258727	RP11-66N24.3	110.23	-0.597963	0.210268	-2.84382	0.00445765	0.0691849
ENSG00000160588	MPZL3	405.526	-0.38869	0.136705	-2.84327	0.0044653	0.0692225
ENSG00000113328	CCNG1	2397.36	0.315385	0.11094	2.84285	0.00447114	0.0692323
ENSG00000102699	PARP4	1084.85	0.341612	0.120277	2.8402	0.00450849	0.0697292
ENSG00000254093	PINX1	301.169	-0.396156	0.139545	-2.83891	0.00452675	0.0698487
ENSG00000160062	ZBTB8A	119.556	0.537927	0.18947	2.83911	0.00452396	0.0698487
ENSG00000156384	SFR1	120.965	0.528615	0.186243	2.83832	0.00453524	0.0698985
ENSG00000100284	TOM1	759.568	0.361296	0.127365	2.83669	0.00455845	0.0701748
ENSG00000125459	MSTO1	484.309	-0.355511	0.125348	-2.8362	0.00456538	0.0702
ENSG00000198040	ZNF84	674.556	-0.343147	0.121064	-2.83444	0.00459065	0.0705069
ENSG00000166123	GPT2	795.844	-0.324024	0.114383	-2.8328	0.00461419	0.0707864
ENSG00000170312	CDK1	1355.6	0.333276	0.117735	2.83072	0.00464427	0.0711657
ENSG00000123146	ADGRE5	1736.96	0.288176	0.101857	2.82922	0.00466613	0.0712962
ENSG00000126804	ZBTB1	460.359	0.459851	0.162547	2.82903	0.00466891	0.0712962
ENSG00000197933	ZNF823	58.5074	0.739952	0.261533	2.82929	0.00466512	0.0712962
ENSG00000143198	MGST3	1404.81	0.320231	0.113246	2.82776	0.00468754	0.0714984
ENSG00000198783	ZNF830	487.68	0.421001	0.148964	2.8262	0.00471039	0.0717645
ENSG00000172292	CERS6	1247.15	-0.337222	0.119342	-2.82567	0.00471812	0.0717999
ENSG00000205208	C4orf46	249.081	-0.425911	0.150972	-2.82113	0.0047855	0.0726585
ENSG00000114735	HEMK1	493.838	-0.345849	0.122588	-2.82122	0.0047841	0.0726585
ENSG00000198431	TXNRD1	2297.12	-0.391673	0.138895	-2.81993	0.00480337	0.0728466
ENSG00000130734	ATG4D	655.099	0.342839	0.121675	2.81767	0.00483737	0.0732785
ENSG00000127870	RNF6	608.313	0.366767	0.130221	2.8165	0.00485495	0.0734608
ENSG00000243479	MNX1-AS1	157.827	-0.509139	0.180956	-2.81361	0.00489882	0.0740403
ENSG00000002016	RAD52	143.213	0.526706	0.187254	2.81279	0.00491136	0.0741454
ENSG00000184743	ATL3	1344.91	0.309071	0.11005	2.80846	0.00497787	0.0749172
ENSG00000273604	C17orf96	765.702	-0.410037	0.146063	-2.80727	0.00499636	0.0749172
ENSG00000172071	EIF2AK3	163.396	0.540043	0.192299	2.80835	0.00497957	0.0749172
ENSG00000261371	PECAM1	2017.24	0.33141	0.118044	2.80752	0.00499252	0.0749172
ENSG00000085377	PREP	1167.16	-0.357858	0.127457	-2.80768	0.00499	0.0749172
ENSG00000101966	XIAP	849.789	0.339536	0.120928	2.80776	0.00498873	0.0749172
ENSG00000206828	U1	25.4693	-1.07244	0.382097	-2.80674	0.00500462	0.0749564
ENSG00000149547	EI24	3711.07	0.276554	0.0985952	2.80494	0.0050326	0.075233
ENSG00000180901	KCTD2	668.78	0.32948	0.117515	2.80374	0.00505144	0.075233
ENSG00000162849	KIF26B	66.9454	-0.674843	0.240639	-2.80438	0.00504127	0.075233
ENSG00000127666	TICAM1	406.912	0.473527	0.168887	2.80382	0.00505016	0.075233
ENSG00000179456	ZBTB18	222.331	0.473774	0.168938	2.80442	0.00504068	0.075233
ENSG00000133805	AMPD3	340.61	0.408146	0.145649	2.80225	0.00507474	0.0752422
ENSG00000101017	CD40	182.968	0.468008	0.167005	2.80236	0.00507297	0.0752422
ENSG00000101439	CST3	2609.47	0.350488	0.125046	2.80288	0.00506486	0.0752422
ENSG00000138018	EPT1	651.469	-0.373763	0.133375	-2.80234	0.00507326	0.0752422
ENSG00000184602	SNN	441.509	0.347396	0.124029	2.80092	0.00509572	0.075469
ENSG00000157538	DSCR3	1166.63	0.335683	0.119921	2.7992	0.00512296	0.0757878
ENSG00000166135	HIF1AN	1480.1	0.310982	0.111115	2.79875	0.00513011	0.0758092
ENSG00000156017	CARNMT1	239.393	-0.452263	0.161635	-2.79805	0.00514119	0.0758882
ENSG00000005893	LAMP2	2044.4	0.338654	0.121057	2.79748	0.00515022	0.0759371
ENSG00000114737	CISH	602.088	0.379862	0.135848	2.79623	0.00517028	0.0761482
ENSG00000114978	MOB1A	3958.74	0.324175	0.116077	2.79276	0.00522608	0.0768146
ENSG00000105229	PIAS4	795.335	0.364745	0.130623	2.79234	0.00523289	0.0768146
ENSG00000188868	ZNF563	49.3453	0.767225	0.274753	2.79242	0.0052315	0.0768146
ENSG00000180340	FZD2	275.738	0.417485	0.149619	2.79031	0.00526574	0.077086
ENSG00000113269	RNF130	3757.6	0.30011	0.107562	2.79012	0.0052688	0.077086
ENSG00000071575	TRIB2	126.426	0.52843	0.189384	2.79025	0.00526672	0.077086
ENSG00000148158	SNX30	168.776	0.50172	0.179947	2.78815	0.00530092	0.0773853
ENSG00000136100	VPS36	1057.25	-0.321643	0.115358	-2.78822	0.00529986	0.0773853
ENSG00000145012	LPP	532.875	0.423138	0.151804	2.78739	0.00531339	0.077482
ENSG00000100599	RIN3	2262.6	0.287823	0.103273	2.78702	0.00531959	0.0774874
ENSG00000181004	BBS12	36.5874	0.878761	0.315395	2.78622	0.00533265	0.0775578
ENSG00000158483	FAM86C1	160.897	-0.466961	0.16763	-2.78566	0.00534196	0.0775578
ENSG00000122884	P4HA1	657.131	-0.333206	0.119612	-2.78572	0.00534082	0.0775578
ENSG00000002586	CD99	6761.36	0.295074	0.105984	2.78414	0.00536706	0.0777641
ENSG00000197746	PSAP	8599.78	0.289558	0.104012	2.78389	0.00537111	0.0777641
ENSG00000221886	ZBED8	70.4407	0.715965	0.257196	2.78373	0.00537375	0.0777641
ENSG00000106003	LFNG	236.929	0.423329	0.152096	2.7833	0.00538094	0.0777833
ENSG00000085563	ABCB1	48.4516	0.781131	0.280724	2.78255	0.00539332	0.0778774
ENSG00000166272	WBP1L	889.603	0.317039	0.113969	2.78179	0.00540599	0.0779756
ENSG00000138080	EMILIN1	89.6149	-0.676058	0.243095	-2.78105	0.00541839	0.0780695
ENSG00000118508	RAB32	1171.92	-0.331466	0.119218	-2.78033	0.00543037	0.0781573
ENSG00000156990	RPUSD3	1441.97	-0.314472	0.113152	-2.7792	0.00544938	0.0783459
ENSG00000213397	HAUS7	25.5521	-1.0378	0.373655	-2.77743	0.005479	0.0786865
ENSG00000163751	CPA3	821.939	0.385786	0.139044	2.77457	0.00552755	0.0791269
ENSG00000129657	SEC14L1	768.688	0.347892	0.125372	2.77489	0.00552206	0.0791269
ENSG00000048028	USP28	178.925	-0.461169	0.166211	-2.7746	0.00552693	0.0791269
ENSG00000070785	EIF2B3	721.099	-0.334724	0.120666	-2.77398	0.00553757	0.0791389
ENSG00000132485	ZRANB2	1842.82	-0.305967	0.110305	-2.77381	0.00554032	0.0791389
ENSG00000121858	TNFSF10	991.53	0.312536	0.112742	2.77213	0.00556905	0.0794637
ENSG00000156535	CD109	440.239	0.398107	0.143663	2.77111	0.00558649	0.0795415
ENSG00000124217	MOCS3	225.796	0.443907	0.160172	2.77144	0.00558094	0.0795415
ENSG00000130758	MAP3K10	68.7012	-0.727093	0.262502	-2.76986	0.00560806	0.079763
ENSG00000065357	DGKA	520.423	-0.393537	0.142232	-2.76687	0.00565975	0.0803261
ENSG00000119185	ITGB1BP1	1797.7	-0.281071	0.101573	-2.76718	0.00565434	0.0803261
ENSG00000196391	ZNF774	64.5374	0.712839	0.25775	2.76563	0.00568134	0.0805464
ENSG00000101187	SLCO4A1	382.242	-0.397646	0.143808	-2.76511	0.00569031	0.0805874
ENSG00000246596	RP11-1277A3.2	38.4934	-0.847368	0.306594	-2.76381	0.0057131	0.0808239
ENSG00000168078	PBK	137.255	0.498101	0.180347	2.76191	0.00574644	0.081209
ENSG00000156515	HK1	868.678	-0.328551	0.119003	-2.76086	0.0057649	0.0813832
ENSG00000072694	FCGR2B	1030.66	0.294207	0.10672	2.75682	0.00583666	0.0822213
ENSG00000123178	SPRYD7	97.6772	-0.674011	0.244468	-2.75705	0.00583251	0.0822213
ENSG00000186660	ZFP91	1578.26	0.327161	0.118745	2.75516	0.00586632	0.0825515
ENSG00000205189	ZBTB10	167.451	-0.526324	0.191293	-2.7514	0.00593406	0.0834163
ENSG00000100418	DESI1	1135.45	-0.338978	0.123217	-2.75105	0.00594042	0.0834173
ENSG00000145050	MANF	2153.42	-0.294954	0.107277	-2.74946	0.00596937	0.0837353
ENSG00000111731	C2CD5	441.553	0.425623	0.154955	2.74676	0.00601879	0.0841865
ENSG00000196743	GM2A	1762.16	0.292694	0.106554	2.7469	0.00601617	0.0841865
ENSG00000101189	MRGBP	655.076	-0.338675	0.123304	-2.74666	0.00602057	0.0841865
ENSG00000198856	OSTC	1533.43	-0.310176	0.112963	-2.74582	0.00603594	0.0843125
ENSG00000081692	JMJD4	963.549	-0.385568	0.140467	-2.74489	0.00605306	0.0844118
ENSG00000101346	POFUT1	1341.79	-0.336692	0.122668	-2.74475	0.00605576	0.0844118
ENSG00000173065	FAM222B	256.887	0.435554	0.158756	2.74354	0.00607799	0.084493
ENSG00000007237	GAS7	833.122	0.318209	0.115983	2.74359	0.00607714	0.084493
ENSG00000137075	RNF38	501.8	0.378389	0.137927	2.7434	0.00608069	0.084493
ENSG00000163527	STT3B	3863.94	-0.314476	0.114725	-2.74112	0.00612296	0.0849913
ENSG00000233558	RP3-486I3.4	75.8515	0.707213	0.258326	2.73767	0.00618755	0.0857981
ENSG00000137331	IER3	162.128	0.475431	0.17372	2.73676	0.00620475	0.0858572
ENSG00000135185	TMEM243	315.341	0.381065	0.13923	2.73695	0.00620117	0.0858572
ENSG00000155252	PI4K2A	360.827	0.363441	0.13292	2.73429	0.00625154	0.0864145
ENSG00000158615	PPP1R15B	773.441	-0.384955	0.140818	-2.7337	0.00626269	0.0864785
ENSG00000051382	PIK3CB	1115.58	-0.332714	0.121782	-2.73204	0.0062943	0.0868222
ENSG00000170473	PYM1	1180.87	0.320841	0.117451	2.73171	0.00630066	0.0868222
ENSG00000121005	CRISPLD1	173.744	0.463362	0.169652	2.73124	0.00630962	0.0868555
ENSG00000063854	HAGH	608.802	-0.322751	0.118236	-2.72972	0.00633883	0.0869975
ENSG00000116273	PHF13	694.399	0.375543	0.137595	2.72934	0.00634617	0.0869975
ENSG00000167393	PPP2R3B	479.967	-0.350093	0.128266	-2.72942	0.00634451	0.0869975
ENSG00000159433	STARD9	240.814	0.447334	0.16387	2.72981	0.0063371	0.0869975
ENSG00000170891	CYTL1	11805.9	0.273379	0.100196	2.72845	0.00636331	0.0870528
ENSG00000143851	PTPN7	8545.97	-0.300698	0.110196	-2.72876	0.00635731	0.0870528
ENSG00000173085	COQ2	389.595	-0.34811	0.127659	-2.72688	0.00639365	0.0871981
ENSG00000172432	GTPBP2	1040.4	0.427176	0.156651	2.72692	0.00639282	0.0871981
ENSG00000133316	WDR74	1870.4	-0.336226	0.123274	-2.72747	0.00638213	0.0871981
ENSG00000151470	C4orf33	150.373	-0.483494	0.177496	-2.72397	0.00645016	0.0877641
ENSG00000235173	HGH1	852.518	-0.323869	0.118906	-2.72373	0.00645499	0.0877641
ENSG00000137275	RIPK1	869.154	0.348454	0.12791	2.72422	0.00644536	0.0877641
ENSG00000102225	CDK16	1153.71	0.292266	0.107405	2.72115	0.00650544	0.0883595
ENSG00000042980	ADAM28	203.558	0.435502	0.160155	2.71926	0.00654272	0.088775
ENSG00000204469	PRRC2A	6712.2	-0.28641	0.105343	-2.71883	0.00655135	0.0888012
ENSG00000155099	TMEM55A	274.72	0.395759	0.145591	2.71829	0.00656202	0.0888552
ENSG00000189306	RRP7A	4160.09	-0.383161	0.141012	-2.71723	0.00658305	0.088989
ENSG00000100580	TMED8	521.241	-0.359413	0.132277	-2.71712	0.00658532	0.088989
ENSG00000105383	CD33	2788.57	-0.28549	0.105113	-2.71603	0.00660705	0.0891918
ENSG00000198538	ZNF28	237.527	0.409213	0.150719	2.71508	0.00662602	0.089357
ENSG00000162813	BPNT1	489.085	-0.355281	0.130904	-2.71405	0.00664658	0.0894525
ENSG00000086730	LAT2	12164.6	-0.257595	0.0949061	-2.7142	0.00664352	0.0894525
ENSG00000286835		61.4105	-0.705701	0.260057	-2.71363	0.00665496	0.0894744
ENSG00000271605	MILR1	464.407	0.331871	0.122391	2.71156	0.00669684	0.0899464
ENSG00000251474	RPL32P3	589.491	-0.346782	0.127908	-2.71119	0.00670421	0.0899544
ENSG00000124493	GRM4	83.2276	-0.624645	0.230493	-2.71004	0.00672758	0.0901768
ENSG00000121417	ZNF211	220.574	0.462445	0.170806	2.70743	0.00678056	0.0907952
ENSG00000185215	TNFAIP2	1037.61	0.383209	0.14157	2.70686	0.00679237	0.0908616
ENSG00000162004	CCDC78	36.4518	-0.885387	0.327307	-2.70507	0.00682906	0.0912605
ENSG00000102547	CAB39L	73.6682	0.624447	0.230895	2.70447	0.00684135	0.0913327
ENSG00000164604	GPR85	389.314	-0.360352	0.133288	-2.70356	0.00686015	0.0914769
ENSG00000227057	WDR46	2693.98	-0.355915	0.13166	-2.70328	0.00686594	0.0914769
ENSG00000198668	CALM1	3760.95	0.256461	0.0949488	2.70105	0.00691217	0.0919264
ENSG00000184216	IRAK1	5460.02	-0.330544	0.122379	-2.70098	0.00691353	0.0919264
ENSG00000115525	ST3GAL5	167.537	0.466277	0.172668	2.70042	0.00692521	0.0919895
ENSG00000196172	ZNF681	82.4817	0.59044	0.218767	2.69894	0.00695597	0.0923058
ENSG00000156697	UTP14A	1304.04	-0.289257	0.107204	-2.69821	0.00697139	0.092418
ENSG00000101596	SMCHD1	837.694	-0.383035	0.142	-2.69743	0.00698763	0.0925408
ENSG00000164305	CASP3	671.894	-0.349265	0.12958	-2.69536	0.00703122	0.0927587
ENSG00000163453	IGFBP7	1142.73	0.318462	0.118153	2.69532	0.00703205	0.0927587
ENSG00000150593	PDCD4	1858.34	0.286442	0.106269	2.69543	0.0070298	0.0927587
ENSG00000125878	TCF15	57.2678	-0.76128	0.282422	-2.69554	0.0070275	0.0927587
ENSG00000254873	RP11-770J1.5	29.2357	0.946016	0.351132	2.69419	0.007056	0.0929822
ENSG00000136997	MYC	4853.52	0.396612	0.147235	2.69373	0.00706575	0.0930184
ENSG00000288398		82.8213	-0.586352	0.217704	-2.69334	0.00707393	0.0930337
ENSG00000125810	CD93	889.251	-0.341677	0.127085	-2.68857	0.00717597	0.094189
ENSG00000237668	RPS15AP38	103.772	0.600657	0.223385	2.68889	0.00716904	0.094189
ENSG00000101546	RBFA	457.092	-0.376397	0.140058	-2.68744	0.00720016	0.0944132
ENSG00000076043	REXO2	331.238	-0.382991	0.14255	-2.68672	0.00721575	0.0945242
ENSG00000106178	CCL24	24.5677	1.05243	0.39226	2.68299	0.00729682	0.0954919
ENSG00000275700	AATF	3087.64	-0.319656	0.119167	-2.68243	0.00730899	0.0954977
ENSG00000150867	PIP4K2A	882.596	-0.309367	0.115336	-2.68231	0.00731166	0.0954977
ENSG00000187634	SAMD11	46.2645	-0.80021	0.298403	-2.68164	0.0073262	0.0955936
ENSG00000120509	PDZD11	421.691	0.360694	0.134625	2.67924	0.00737888	0.0961864
ENSG00000155792	DEPTOR	336.84	-0.415224	0.155021	-2.67851	0.00739511	0.0962484
ENSG00000148300	REXO4	1349.94	-0.319288	0.11921	-2.67837	0.00739814	0.0962484
ENSG00000035862	TIMP2	654.602	0.310774	0.11608	2.67723	0.00742326	0.0964806
ENSG00000119929	CUTC	888.091	-0.306277	0.114447	-2.67615	0.00744727	0.0965314
ENSG00000065809	FAM107B	1052.77	0.327162	0.122275	2.67562	0.00745922	0.0965314
ENSG00000198712	MT-CO2	88047.1	0.283968	0.106092	2.67661	0.00743714	0.0965314
ENSG00000255529	POLR2M	333.728	-0.379782	0.141952	-2.67542	0.00746354	0.0965314
ENSG00000278291	RP11-172H24.4	58.7712	-0.680381	0.254247	-2.67606	0.0074493	0.0965314
ENSG00000181938	GINS3	551.167	0.33509	0.125408	2.67199	0.00754039	0.0974038
ENSG00000197905	TEAD4	252.285	-0.4178	0.156377	-2.67175	0.00754568	0.0974038
ENSG00000132640	BTBD3	230.684	0.440892	0.165237	2.66825	0.00762482	0.0983298
ENSG00000085511	MAP3K4	494.115	-0.343346	0.128707	-2.66767	0.00763796	0.0984037
ENSG00000172197	MBOAT1	386.796	-0.355995	0.133521	-2.66621	0.00767117	0.0987356
ENSG00000124006	OBSL1	1076.02	-0.330428	0.124055	-2.66356	0.0077318	0.0992272
ENSG00000059378	PARP12	90.2067	-0.586377	0.220138	-2.66367	0.00772924	0.0992272
ENSG00000185670	ZBTB3	100.293	0.539425	0.202472	2.66419	0.0077174	0.0992272
ENSG00000119917	IFIT3	114.623	0.529457	0.198859	2.66247	0.00775695	0.0994538
ENSG00000145569	FAM105A	792.796	0.354274	0.133155	2.66062	0.00779967	0.0997844
ENSG00000120696	KBTBD7	145.052	0.468091	0.175949	2.66038	0.00780529	0.0997844
ENSG00000143442	POGZ	1070.29	0.309987	0.116515	2.66048	0.0078029	0.0997844
ENSG00000119684	MLH3	218.971	-0.428066	0.160969	-2.6593	0.00783033	0.100008
ENSG00000123240	OPTN	350.513	0.38766	0.145809	2.65869	0.0078446	0.100094
ENSG00000142039	CCDC97	867.549	0.327122	0.123067	2.65809	0.0078585	0.100128
ENSG00000166189	HPS6	769.908	0.408604	0.15373	2.65792	0.00786234	0.100128
ENSG00000214796	RP11-480I12.5	276.874	-0.404535	0.152275	-2.6566	0.00789329	0.100426
ENSG00000066455	GOLGA5	371.657	0.374293	0.141263	2.64962	0.0080582	0.102426
ENSG00000128590	DNAJB9	47.9933	0.726142	0.274185	2.64837	0.0080882	0.102709
ENSG00000067208	EVI5	35.1527	-0.841884	0.317981	-2.64759	0.00810671	0.102737
ENSG00000147124	ZNF41	58.8386	0.6825	0.257748	2.64793	0.00809855	0.102737
ENSG00000019995	ZRANB1	544.317	0.360098	0.136024	2.6473	0.00811366	0.102737
ENSG00000117480	FAAH	154.348	-0.488628	0.18464	-2.64638	0.00813588	0.10292
ENSG00000280798	LINC00294	288.968	0.412319	0.155824	2.64605	0.00814367	0.10292
ENSG00000119729	RHOQ	474.962	0.331153	0.125218	2.64462	0.00817828	0.10326
ENSG00000186666	BCDIN3D	76.3707	0.581911	0.220095	2.64391	0.00819549	0.10328
ENSG00000110031	LPXN	2327.16	0.333394	0.12609	2.6441	0.00819083	0.10328
ENSG00000204267	TAP2	342.16	-0.353897	0.133871	-2.64356	0.00820386	0.103288
ENSG00000189057	FAM111B	148.784	0.49935	0.188992	2.64218	0.00823743	0.103416
ENSG00000250144	RP11-553P9.1	247.757	0.48418	0.183235	2.64239	0.00823222	0.103416
ENSG00000171204	TMEM126B	491.898	-0.34709	0.131344	-2.6426	0.00822711	0.103416
ENSG00000144566	RAB5A	647.597	0.337443	0.127839	2.6396	0.00830034	0.104009
ENSG00000186815	TPCN1	299.559	-0.383839	0.14541	-2.63969	0.00829818	0.104009
ENSG00000114573	ATP6V1A	784.584	0.295263	0.111878	2.63916	0.00831108	0.104045
ENSG00000177692	DNAJC28	29.1479	0.929974	0.352588	2.63756	0.00835041	0.104439
ENSG00000171428	NAT1	130.513	0.505486	0.191687	2.63703	0.00836343	0.104503
ENSG00000133317	LGALS12	84.7375	0.637139	0.241703	2.63604	0.00838796	0.104711
ENSG00000210195	MT-TT	276.202	0.378895	0.143976	2.63166	0.00849692	0.105773
ENSG00000278834	RP11-458J1.1	138.472	-0.473469	0.179885	-2.63206	0.00848685	0.105773
ENSG00000130204	TOMM40	7137.43	-0.402732	0.153031	-2.63171	0.00849569	0.105773
ENSG00000031691	CENPQ	304.886	0.382029	0.145302	2.62921	0.00855843	0.106007
ENSG00000165891	E2F7	223.624	0.474676	0.180512	2.62961	0.00854835	0.106007
ENSG00000115738	ID2	593.244	0.378108	0.143785	2.62967	0.00854673	0.106007
ENSG00000123066	MED13L	1515.59	-0.423193	0.160914	-2.62994	0.00854004	0.106007
ENSG00000159885	ZNF222	39.9013	0.776658	0.295419	2.629	0.00856365	0.106007
ENSG00000204946	ZNF783	125.967	-0.498422	0.189545	-2.62957	0.00854917	0.106007
ENSG00000164040	PGRMC2	730.176	-0.305166	0.116178	-2.62671	0.00862151	0.106624
ENSG00000100439	ABHD4	150.2	0.515447	0.196685	2.62067	0.00877571	0.107139
ENSG00000175220	ARHGAP1	1569.06	0.330066	0.126007	2.61942	0.00880803	0.107139
ENSG00000160345	C9orf116	34.601	0.857894	0.32715	2.62233	0.0087332	0.107139
ENSG00000105971	CAV2	58.1207	0.658493	0.251451	2.61878	0.00882458	0.107139
ENSG00000155508	CNOT8	1893.9	0.313303	0.119654	2.6184	0.00883426	0.107139
ENSG00000244682	FCGR2C	444.066	0.334113	0.127493	2.62063	0.00877662	0.107139
ENSG00000135643	KCNMB4	35.0877	-0.851054	0.324968	-2.61889	0.00882177	0.107139
ENSG00000188130	MAPK12	984.931	-0.350999	0.133816	-2.62299	0.0087162	0.107139
ENSG00000149573	MPZL2	94.34	-0.534555	0.20405	-2.61973	0.00880006	0.107139
ENSG00000167566	NCKAP5L	553.254	0.346095	0.132145	2.61906	0.0088172	0.107139
ENSG00000106236	NPTX2	154.002	0.485265	0.184896	2.62453	0.00867681	0.107139
ENSG00000068137	PLEKHH3	43.5837	0.78479	0.299545	2.61994	0.0087945	0.107139
ENSG00000160957	RECQL4	1528.97	-0.318442	0.121512	-2.62066	0.00877605	0.107139
ENSG00000242445	RPL7AP11	73.2531	0.62147	0.237253	2.61944	0.00880746	0.107139
ENSG00000180900	SCRIB	1666.89	-0.361606	0.138094	-2.61855	0.00883035	0.107139
ENSG00000232956	SNHG15	1468.08	-0.271157	0.103477	-2.62046	0.00878108	0.107139
ENSG00000145779	TNFAIP8	580.05	0.321677	0.122806	2.6194	0.00880849	0.107139
ENSG00000250067	YJEFN3	67.1254	-0.698431	0.266213	-2.62358	0.00870111	0.107139
ENSG00000100027	YPEL1	47.8327	0.741782	0.282735	2.62359	0.00870078	0.107139
ENSG00000140836	ZFHX3	343.058	0.357943	0.136716	2.61815	0.00884081	0.107139
ENSG00000186300	ZNF555	33.6767	0.867414	0.330818	2.62203	0.00874089	0.107139
ENSG00000132801	ZSWIM3	123.795	0.649422	0.247951	2.61916	0.00881475	0.107139
ENSG00000169252	ADRB2	122.127	0.502825	0.192082	2.61777	0.00885075	0.107162
ENSG00000131626	PPFIA1	738.74	0.335987	0.128366	2.61741	0.00886006	0.107177
ENSG00000133612	AGAP3	315.215	-0.379166	0.144891	-2.61692	0.00887281	0.107233
ENSG00000158092	NCK1	136.444	0.503651	0.192535	2.61589	0.00889959	0.107459
ENSG00000165322	ARHGAP12	121.316	0.484566	0.18554	2.61165	0.00901056	0.108421
ENSG00000170759	KIF5B	2838.53	-0.330791	0.12667	-2.61143	0.00901638	0.108421
ENSG00000172578	KLHL6	574.869	0.333328	0.127654	2.61119	0.00902288	0.108421
ENSG00000262049	RP13-1032I1.7	159.741	-0.476317	0.182428	-2.61098	0.00902825	0.108421
ENSG00000254004	ZNF260	222.368	0.441709	0.169098	2.61214	0.00899773	0.108421
ENSG00000173041	ZNF680	304.144	0.390723	0.149643	2.61103	0.00902689	0.108421
ENSG00000136536	MARCH7	1418.18	0.323259	0.123843	2.61023	0.00904811	0.108463
ENSG00000122642	FKBP9	277.105	-0.394199	0.151005	-2.6105	0.00904106	0.108463
ENSG00000164117	FBXO8	131.848	0.489799	0.187675	2.60982	0.00905904	0.108496
ENSG00000040633	PHF23	1471.7	0.35063	0.134397	2.60891	0.00908299	0.108685
ENSG00000148399	DPH7	664.726	-0.332195	0.127401	-2.60747	0.0091215	0.109047
ENSG00000118894	EEF2KMT	316.443	-0.364135	0.139741	-2.60579	0.00916635	0.109386
ENSG00000165072	MAMDC2	30.259	0.913945	0.350721	2.6059	0.00916325	0.109386
ENSG00000166503	RP11-382A20.3	346.084	-0.377179	0.144765	-2.60546	0.00917497	0.109391
ENSG00000163596	ICA1L	192.63	-0.470178	0.180559	-2.60401	0.00921403	0.109758
ENSG00000164111	ANXA5	92.088	0.610393	0.234481	2.60317	0.00923656	0.109927
ENSG00000213757	CTC-451P13.1	126.484	0.501698	0.192785	2.60237	0.00925831	0.110088
ENSG00000121807	CCR2	137.913	0.517035	0.198715	2.6019	0.00927089	0.110138
ENSG00000070614	NDST1	899.997	-0.330231	0.126976	-2.60073	0.00930249	0.110316
ENSG00000133872	SARAF	4432.7	0.267834	0.102973	2.60101	0.00929491	0.110316
ENSG00000115850	LCT	75.0407	-0.609785	0.234529	-2.60004	0.00932124	0.110342
ENSG00000226525	RPS7P10	144.855	0.530957	0.204206	2.6001	0.00931969	0.110342
ENSG00000143321	HDGF	9253.15	-0.276602	0.106444	-2.59857	0.00936135	0.110718
ENSG00000005238	FAM214B	455.354	0.343471	0.132209	2.59794	0.00937855	0.110822
ENSG00000167996	FTH1	17746.2	0.276986	0.106671	2.59663	0.00941424	0.111145
ENSG00000183010	PYCR1	385.324	-0.372328	0.143412	-2.59622	0.00942569	0.111181
ENSG00000196182	STK40	1532.08	0.26105	0.10062	2.59442	0.0094751	0.111665
ENSG00000124942	AHNAK	5043.31	0.331749	0.127885	2.59411	0.00948361	0.111666
ENSG00000102858	MGRN1	2481.7	-0.317229	0.122359	-2.59261	0.00952504	0.111955
ENSG00000148154	UGCG	126.382	0.535267	0.206441	2.59283	0.00951898	0.111955
ENSG00000182149	IST1	3243.29	0.299042	0.115386	2.59167	0.00955103	0.112161
ENSG00000175318	GRAMD2	23.7095	1.01618	0.392523	2.58886	0.00962956	0.112983
ENSG00000182782	HCAR2	59.9033	-0.740522	0.286103	-2.58831	0.00964494	0.113064
ENSG00000159921	GNE	447.498	0.446349	0.172502	2.5875	0.00966752	0.113229
ENSG00000168040	FADD	1184.93	0.300167	0.116104	2.58533	0.0097285	0.113842
ENSG00000162129	CLPB	1611.98	-0.294024	0.113843	-2.58273	0.00980228	0.11442
ENSG00000130766	SESN2	541.883	0.325563	0.126054	2.58274	0.00980199	0.11442
ENSG00000102226	USP11	1806.42	0.304552	0.117924	2.5826	0.00980591	0.11442
ENSG00000286816		21.8958	-1.06961	0.414196	-2.58237	0.0098124	0.11442
ENSG00000071894	CPSF1	2659.44	-0.268868	0.104157	-2.58139	0.00984044	0.114562
ENSG00000134369	NAV1	325.243	-0.38006	0.147234	-2.58134	0.00984179	0.114562
ENSG00000109674	NEIL3	273.204	0.410836	0.159257	2.5797	0.00988866	0.114961
ENSG00000185361	TNFAIP8L1	1440.35	0.317795	0.123198	2.57953	0.00989338	0.114961
ENSG00000133321	RARRES3	51.2696	0.681902	0.264527	2.57782	0.00994266	0.115375
ENSG00000178307	TMEM11	831.531	0.304793	0.118243	2.57769	0.0099464	0.115375
ENSG00000144827	ABHD10	456.358	0.323708	0.125596	2.57738	0.00995518	0.115376
ENSG00000137193	PIM1	1686.25	-0.303232	0.11771	-2.5761	0.00999208	0.115702
ENSG00000204524	ZNF805	79.4783	0.593416	0.230465	2.57487	0.0100279	0.116016
ENSG00000146535	GNA12	1068.79	0.296251	0.115115	2.57352	0.010067	0.116367
ENSG00000156735	BAG4	464.505	0.345328	0.134243	2.57242	0.0100991	0.116434
ENSG00000169710	FASN	6681.68	-0.266352	0.103566	-2.57182	0.0101167	0.116434
ENSG00000112699	GMDS	992.268	-0.294873	0.114646	-2.57202	0.0101107	0.116434
ENSG00000124587	PEX6	676.457	-0.308726	0.120004	-2.57264	0.0100927	0.116434
ENSG00000100219	XBP1	4051.65	-0.316438	0.123036	-2.57191	0.0101138	0.116434
ENSG00000171984	C20orf196	165.938	0.446244	0.173673	2.56945	0.010186	0.116976
ENSG00000180822	PSMG4	433.001	-0.375521	0.146174	-2.56901	0.010199	0.116976
ENSG00000010327	STAB1	13154.2	-0.266479	0.103728	-2.56901	0.0101989	0.116976
ENSG00000167554	ZNF610	39.5075	0.787245	0.306333	2.5699	0.0101729	0.116976
ENSG00000196440	ARMCX4	67.6045	-0.627129	0.244181	-2.5683	0.0102199	0.117013
ENSG00000007968	E2F2	471.688	-0.339518	0.13219	-2.5684	0.0102169	0.117013
ENSG00000070444	MNT	623.137	-0.30415	0.118479	-2.56712	0.0102547	0.11731
ENSG00000100578	KIAA0586	279.651	-0.361828	0.141008	-2.56602	0.0102874	0.117582
ENSG00000178974	FBXO34	693.388	0.338276	0.131918	2.56428	0.010339	0.117969
ENSG00000171105	INSR	575.068	0.326426	0.127289	2.56444	0.0103344	0.117969
ENSG00000115561	CHMP3	1338.42	0.330802	0.129022	2.56392	0.0103497	0.11799
ENSG00000144560	VGLL4	712.692	0.299518	0.116884	2.56252	0.0103915	0.118263
ENSG00000171475	WIPF2	1290.76	0.30402	0.118634	2.56268	0.0103866	0.118263
ENSG00000136842	TMOD1	57.0941	-0.665932	0.260007	-2.56121	0.0104307	0.118608
ENSG00000163510	CWC22	582.12	0.304842	0.119045	2.56072	0.0104454	0.118674
ENSG00000166167	BTRC	223.21	0.41082	0.160555	2.55875	0.010505	0.119249
ENSG00000104687	GSR	1558.68	-0.317416	0.12408	-2.55816	0.0105228	0.119348
ENSG00000165138	ANKS6	459.904	-0.334043	0.130662	-2.55654	0.010572	0.119528
ENSG00000087086	FTL	43514.1	0.272978	0.10676	2.55693	0.0105602	0.119528
ENSG00000115339	GALNT3	274.616	0.424303	0.165974	2.55645	0.0105746	0.119528
ENSG00000137955	RABGGTB	1809.06	-0.265968	0.10401	-2.55714	0.0105536	0.119528
ENSG00000166166	TRMT61A	995.36	-0.46426	0.181925	-2.55193	0.0107128	0.120986
ENSG00000169504	CLIC4	1439.19	0.297779	0.116763	2.55029	0.0107633	0.121144
ENSG00000177192	PUS1	1755.1	-0.348779	0.136742	-2.55062	0.010753	0.121144
ENSG00000248124	RRN3P1	63.9602	-0.661926	0.259476	-2.55101	0.010741	0.121144
ENSG00000169981	ZNF35	205.104	0.425281	0.166743	2.55052	0.0107561	0.121144
ENSG00000104907	TRMT1	2120.98	-0.365217	0.14328	-2.54897	0.0108042	0.121501
ENSG00000177602	GSG2	239.67	0.388941	0.152606	2.54865	0.0108139	0.121508
ENSG00000152990	ADGRA3	118.465	-0.513253	0.201463	-2.54762	0.0108459	0.121764
ENSG00000165494	PCF11	1187.76	-0.269156	0.105676	-2.54701	0.0108652	0.121774
ENSG00000141526	SLC16A3	1597.56	0.409034	0.160591	2.54706	0.0108635	0.121774
ENSG00000129055	ANAPC13	868.228	0.305301	0.119901	2.54627	0.0108879	0.121824
ENSG00000173597	SULT1B1	29.9396	-0.918659	0.360784	-2.54628	0.0108877	0.121824
ENSG00000108702	CCL1	123.659	0.506337	0.198993	2.5445	0.0109434	0.12193
ENSG00000179115	FARSA	6336.29	-0.293294	0.115252	-2.54481	0.0109337	0.12193
ENSG00000182963	GJC1	85.9128	0.546552	0.214731	2.54528	0.0109189	0.12193
ENSG00000181610	MRPS23	1636.44	-0.278637	0.1095	-2.54463	0.0109393	0.12193
ENSG00000165699	TSC1	513.397	0.336546	0.132263	2.54451	0.010943	0.12193
ENSG00000121064	SCPEP1	373.33	0.400321	0.157349	2.54416	0.0109542	0.121948
ENSG00000185862	EVI2B	240.193	0.470167	0.18491	2.54269	0.0110004	0.12236
ENSG00000180902	D2HGDH	777.777	-0.457264	0.179871	-2.54219	0.0110162	0.122433
ENSG00000150347	ARID5B	93.5194	0.531294	0.209224	2.53936	0.0111057	0.12281
ENSG00000168438	CDC40	591.287	0.314478	0.123817	2.53987	0.0110894	0.12281
ENSG00000093167	LRRFIP2	1387.07	0.27692	0.109026	2.53994	0.011087	0.12281
ENSG00000167272	POP5	993.738	-0.302252	0.118995	-2.54004	0.0110839	0.12281
ENSG00000145365	TIFA	308.491	0.378531	0.149052	2.53958	0.0110984	0.12281
ENSG00000171606	ZNF274	1088.04	0.280935	0.11061	2.53987	0.0110894	0.12281
ENSG00000143498	TAF1A	72.5298	0.580575	0.228694	2.53865	0.0111282	0.122957
ENSG00000229337	AC079305.8	42.1524	-0.796894	0.314028	-2.53765	0.01116	0.123206
ENSG00000181104	F2R	363.91	-0.352827	0.139068	-2.53708	0.0111782	0.123304
ENSG00000053770	AP5M1	741.144	0.290556	0.114559	2.53629	0.0112034	0.123479
ENSG00000131943	C19orf12	353.324	0.382997	0.151044	2.53566	0.0112235	0.123598
ENSG00000096654	ZNF184	182.584	0.4364	0.172138	2.53517	0.0112393	0.123669
ENSG00000124491	F13A1	1664.88	-0.350149	0.138184	-2.53393	0.011279	0.123912
ENSG00000197046	SIGLEC15	86.2093	0.5517	0.217752	2.53361	0.0112893	0.123912
ENSG00000109171	SLAIN2	529.594	0.327674	0.129325	2.53373	0.0112857	0.123912
ENSG00000249264	EEF1A1P9	466.708	0.391128	0.154463	2.53217	0.011336	0.124321
ENSG00000164056	SPRY1	72.027	0.632279	0.249945	2.52967	0.011417	0.125098
ENSG00000267508	ZNF285	75.4865	0.584855	0.231223	2.5294	0.0114257	0.125098
ENSG00000128422	KRT17	335.867	0.402244	0.159059	2.52889	0.0114422	0.125176
ENSG00000162441	LZIC	761.855	-0.284478	0.112526	-2.52811	0.0114679	0.125354
ENSG00000111845	PAK1IP1	794.396	-0.296155	0.11717	-2.52757	0.0114854	0.125441
ENSG00000184508	HDDC3	640.008	-0.318418	0.126002	-2.52709	0.0115013	0.125512
ENSG00000126970	ZC4H2	210.817	-0.403432	0.159666	-2.52673	0.0115131	0.125537
ENSG00000175866	BAIAP2	512.934	0.343264	0.135896	2.52594	0.0115389	0.125715
ENSG00000006704	GTF2IRD1	94.2963	0.561954	0.222544	2.52514	0.0115652	0.125899
ENSG00000182885	ADGRG3	502.992	-0.304802	0.12074	-2.52444	0.0115882	0.126045
ENSG00000104643	MTMR9	342.238	0.34944	0.138564	2.52188	0.0116731	0.126864
ENSG00000175792	RUVBL1	3174.51	-0.269861	0.107029	-2.52139	0.0116894	0.126938
ENSG00000059804	SLC2A3	1327.26	0.275873	0.109458	2.52034	0.011724	0.12721
ENSG00000119231	SENP5	686.866	0.325091	0.129026	2.51957	0.0117497	0.127377
ENSG00000104635	SLC39A14	840.808	-0.322428	0.127983	-2.51931	0.0117586	0.127377
ENSG00000169288	MRPL1	1544.51	-0.324626	0.1289	-2.51842	0.0117881	0.127489
ENSG00000073050	XRCC1	761.399	-0.307638	0.122155	-2.51842	0.0117881	0.127489
ENSG00000156521	TYSND1	301.997	-0.35502	0.141072	-2.51658	0.01185	0.128054
ENSG00000096070	BRPF3	209.128	0.520505	0.206858	2.51624	0.0118613	0.128071
ENSG00000245205	EEF1A1P4	151.284	0.552948	0.219798	2.51571	0.0118794	0.128162
ENSG00000184203	PPP1R2	685.175	-0.292833	0.116506	-2.51345	0.0119556	0.128879
ENSG00000173295	FAM86B3P	66.9421	-0.620355	0.246938	-2.51219	0.0119986	0.128928
ENSG00000007264	MATK	2671.26	-0.419618	0.167004	-2.51263	0.0119836	0.128928
ENSG00000228727	SAPCD1	24.6813	-1.03777	0.413013	-2.51268	0.0119817	0.128928
ENSG00000174652	ZNF266	593.114	0.291296	0.115954	2.51218	0.0119989	0.128928
ENSG00000151065	DCP1B	319.831	0.368968	0.146924	2.51128	0.0120293	0.128942
ENSG00000209482	SNORD83A	32.4678	-0.849908	0.338436	-2.51128	0.0120294	0.128942
ENSG00000135482	ZC3H10	157.802	0.501883	0.19981	2.5118	0.0120118	0.128942
ENSG00000163904	SENP2	486.794	0.327248	0.130335	2.51083	0.0120449	0.129003
ENSG00000157978	LDLRAP1	684.026	0.312023	0.124296	2.51032	0.0120623	0.129086
ENSG00000205464	ATP6AP1L	47.985	-0.716677	0.285559	-2.50973	0.0120824	0.129093
ENSG00000168487	BMP1	884.587	-0.301063	0.119954	-2.50981	0.0120796	0.129093
ENSG00000102189	EEA1	291.491	-0.490986	0.195786	-2.50777	0.0121496	0.129528
ENSG00000043143	JADE2	1615.98	0.259633	0.103525	2.50792	0.0121445	0.129528
ENSG00000267858	MZF1-AS1	63.4571	-0.611438	0.243825	-2.50769	0.0121524	0.129528
ENSG00000213699	SLC35F6	500.836	-0.349482	0.1394	-2.50704	0.0121748	0.129662
ENSG00000075413	MARK3	1732.66	-0.256762	0.102452	-2.50617	0.0122046	0.129771
ENSG00000136527	TRA2B	8560.84	-0.242856	0.0968977	-2.50632	0.0121996	0.129771
ENSG00000150455	TIRAP	71.1657	0.596701	0.238122	2.50586	0.0122152	0.129781
ENSG00000107719	PALD1	403.426	-0.374758	0.149598	-2.50511	0.0122414	0.129955
ENSG00000162600	OMA1	112.058	-0.498533	0.199126	-2.5036	0.0122937	0.130405
ENSG00000127824	TUBA4A	744.44	-0.310924	0.124225	-2.50292	0.0123175	0.130554
ENSG00000164684	ZNF704	281.613	0.377453	0.150862	2.50198	0.01235	0.130794
ENSG00000109458	GAB1	123.171	0.48741	0.194838	2.50162	0.0123627	0.130824
ENSG00000139112	GABARAPL1	231.727	0.413488	0.16531	2.50129	0.0123741	0.13084
ENSG00000167447	SMG8	247.703	0.399705	0.159833	2.50076	0.0123927	0.130932
ENSG00000168300	PCMTD1	332.126	0.351973	0.140831	2.49926	0.0124451	0.131382
ENSG00000261971	MMP25-AS1	100.41	-0.517219	0.206995	-2.49871	0.0124646	0.131483
ENSG00000166927	MS4A7	81.6589	0.626145	0.250636	2.49822	0.0124818	0.13156
ENSG00000180066	C10orf91	103.935	-0.506589	0.202832	-2.49758	0.0125044	0.131693
ENSG00000067113	PLPP1	65.5063	0.596568	0.238906	2.49708	0.0125221	0.131775
ENSG00000129317	PUS7L	356.833	-0.385042	0.154235	-2.49647	0.0125437	0.131793
ENSG00000142864	SERBP1	12319.7	-0.228511	0.0915303	-2.49656	0.0125405	0.131793
ENSG00000143493	INTS7	932.796	0.307528	0.123259	2.49497	0.0125967	0.132246
ENSG00000135763	URB2	374.051	-0.397085	0.159276	-2.49306	0.0126649	0.132856
ENSG00000159128	IFNGR2	819.463	0.281403	0.112898	2.49254	0.0126833	0.132944
ENSG00000185163	DDX51	1033.32	-0.280196	0.112516	-2.49028	0.0127644	0.133603
ENSG00000196812	ZSCAN16	96.9064	0.527119	0.211675	2.49022	0.0127663	0.133603
ENSG00000143624	INTS3	1613.82	-0.277242	0.111384	-2.48906	0.0128081	0.133829
ENSG00000163683	SMIM14	104.714	0.493267	0.198158	2.48926	0.0128008	0.133829
ENSG00000196705	ZNF431	555.868	0.322588	0.129695	2.48727	0.0128727	0.134398
ENSG00000148153	INIP	694.81	0.284607	0.114558	2.4844	0.0129769	0.13538
ENSG00000136111	TBC1D4	331.508	-0.355979	0.143308	-2.48402	0.012991	0.13542
ENSG00000164877	MICALL2	405.378	-0.3672	0.147892	-2.48289	0.0130322	0.135743
ENSG00000163602	RYBP	1003.09	0.291409	0.117385	2.4825	0.0130463	0.135784
ENSG00000181773	GPR3	37.2417	-0.777225	0.313215	-2.48144	0.0130852	0.136082
ENSG00000125740	FOSB	1756.76	-0.73767	0.297361	-2.48072	0.0131116	0.136143
ENSG00000105607	GCDH	1092.55	-0.303747	0.122436	-2.48086	0.0131065	0.136143
ENSG00000131016	AKAP12	40.9892	-0.757517	0.305512	-2.4795	0.0131568	0.136399
ENSG00000138778	CENPE	613.125	-0.319312	0.128771	-2.4797	0.0131494	0.136399
ENSG00000170476	MZB1	25.1837	-0.943289	0.380637	-2.47819	0.0132051	0.136793
ENSG00000162194	LBHD1	435.34	-0.346956	0.140129	-2.47597	0.0132874	0.137538
ENSG00000143537	ADAM15	3442.94	-0.244897	0.0989906	-2.47394	0.0133632	0.138066
ENSG00000143149	ALDH9A1	1138.49	0.423605	0.171244	2.4737	0.0133723	0.138066
ENSG00000110395	CBL	810.718	0.342716	0.138556	2.47349	0.01338	0.138066
ENSG00000160959	LRRC14	697.137	-0.297411	0.120211	-2.47408	0.0133581	0.138066
ENSG00000124535	WRNIP1	1431.26	-0.31828	0.128693	-2.47316	0.0133923	0.138085
ENSG00000073536	NLE1	932.753	-0.276235	0.111733	-2.47227	0.0134257	0.138322
ENSG00000099821	POLRMT	2272	-0.295076	0.119464	-2.46999	0.0135116	0.138776
ENSG00000135316	SYNCRIP	4455	-0.281133	0.113814	-2.4701	0.0135075	0.138776
ENSG00000187626	ZKSCAN4	170.681	0.424278	0.17174	2.47047	0.0134936	0.138776
ENSG00000083817	ZNF416	152.067	0.444783	0.180017	2.47079	0.0134816	0.138776
ENSG00000023892	DEF6	1598.08	-0.371044	0.150252	-2.46949	0.0135307	0.138865
ENSG00000104870	FCGRT	1089.5	0.323103	0.130859	2.4691	0.0135453	0.138907
ENSG00000140006	WDR89	265.687	0.381487	0.154539	2.46854	0.0135664	0.139016
ENSG00000175224	ATG13	2409.84	0.255074	0.103455	2.46555	0.0136802	0.139998
ENSG00000107679	PLEKHA1	99.6282	0.531587	0.215613	2.46547	0.0136833	0.139998
ENSG00000132017	DCAF15	1335.42	0.30333	0.123127	2.46354	0.0137571	0.140447
ENSG00000099364	FBXL19	1551.49	-0.372147	0.151065	-2.4635	0.013759	0.140447
ENSG00000116731	PRDM2	507.373	0.368657	0.149616	2.46403	0.0137386	0.140447
ENSG00000260267	RP11-452L6.5	162.625	-0.451911	0.183843	-2.45814	0.013966	0.142451
ENSG00000132109	TRIM21	882.727	0.299245	0.121766	2.45754	0.0139892	0.142525
ENSG00000116525	TRIM62	128.326	0.457917	0.186342	2.4574	0.0139948	0.142525
ENSG00000104324	CPQ	161.989	0.423018	0.172336	2.45461	0.0141039	0.143342
ENSG00000108424	KPNB1	10849.8	-0.230963	0.0940972	-2.45452	0.0141073	0.143342
ENSG00000243156	MICAL3	187.035	-0.446039	0.181698	-2.45484	0.0140947	0.143342
ENSG00000132334	PTPRE	487.31	0.332079	0.135358	2.45334	0.0141538	0.143514
ENSG00000117616	RSRP1	787.301	0.321615	0.131068	2.45381	0.0141353	0.143514
ENSG00000158480	SPATA2	250.938	0.362745	0.147879	2.45299	0.0141676	0.143514
ENSG00000155975	VPS37A	488.738	0.335112	0.136629	2.45271	0.0141784	0.143514
ENSG00000153975	ZUFSP	261.532	0.358873	0.146292	2.45313	0.0141621	0.143514
ENSG00000186063	AIDA	195.192	0.452942	0.184722	2.45202	0.0142056	0.14368
ENSG00000150782	IL18	529.682	0.318619	0.129998	2.45096	0.0142477	0.143777
ENSG00000117697	NSL1	555.299	0.295856	0.120685	2.45147	0.0142275	0.143777
ENSG00000062822	POLD1	1815.26	-0.260533	0.106297	-2.451	0.0142458	0.143777
ENSG00000131849	ZNF132	71.1831	0.607631	0.247973	2.45039	0.0142703	0.143896
ENSG00000120647	CCDC77	264.577	0.361781	0.147802	2.44774	0.0143757	0.144192
ENSG00000185504	FAAP100	1324.44	-0.27997	0.114379	-2.44775	0.0143753	0.144192
ENSG00000178988	MRFAP1L1	1274.64	0.273056	0.111544	2.44796	0.0143667	0.144192
ENSG00000170515	PA2G4	10303.4	-0.25437	0.103859	-2.44918	0.0143183	0.144192
ENSG00000099899	TRMT2A	1797.54	-0.289076	0.118097	-2.44778	0.0143739	0.144192
ENSG00000272221	XXbac-BPG181B23.7	59.4267	0.605429	0.247233	2.44882	0.0143325	0.144192
ENSG00000100403	ZC3H7B	1743.77	-0.289058	0.118054	-2.44852	0.0143444	0.144192
ENSG00000148572	NRBF2	431.879	0.343064	0.14034	2.44452	0.0145045	0.145361
ENSG00000130669	PAK4	524.714	0.336241	0.137562	2.44428	0.0145142	0.145361
ENSG00000127993	RBM48	399.164	0.356259	0.145846	2.44271	0.0145775	0.145775
ENSG00000120942	UBIAD1	770.643	-0.276895	0.11335	-2.44283	0.0145725	0.145775
ENSG00000197928	ZNF677	214.877	0.384048	0.157244	2.44236	0.0145915	0.145805
ENSG00000135040	NAA35	541.664	-0.321048	0.131485	-2.44171	0.014618	0.14596
ENSG00000166451	CENPN	758.127	0.283587	0.116291	2.4386	0.0147442	0.14711
ENSG00000172831	CES2	1170.52	-0.26666	0.109392	-2.43767	0.0147824	0.147159
ENSG00000182481	KPNA2	5029.6	0.24628	0.101024	2.43785	0.0147749	0.147159
ENSG00000124067	SLC12A4	176.345	-0.415216	0.170298	-2.43817	0.014762	0.147159
ENSG00000170801	HTRA3	5513.28	-0.293767	0.120533	-2.43724	0.0147999	0.147222
ENSG00000156587	UBE2L6	1016.78	-0.275269	0.112978	-2.43649	0.0148307	0.147418
ENSG00000170558	CDH2	88.2896	0.503192	0.206573	2.4359	0.0148547	0.147546
ENSG00000171320	ESCO2	356.937	0.353491	0.145198	2.43455	0.0149104	0.147879
ENSG00000110811	P3H3	782.251	-0.400963	0.164681	-2.43479	0.0149002	0.147879
ENSG00000157827	FMNL2	41.2227	-0.723662	0.297432	-2.43303	0.0149729	0.148334
ENSG00000261556	SMG1P7	44.2804	-0.710365	0.291984	-2.43289	0.0149788	0.148334
ENSG00000241343	RPL36A	378.966	-0.413149	0.169884	-2.43195	0.0150178	0.14861
ENSG00000104267	CA2	4734.22	-0.309429	0.127263	-2.43142	0.0150399	0.148718
ENSG00000157601	MX1	178.375	0.409461	0.168488	2.43022	0.0150898	0.1491
ENSG00000272009	RP1-313I6.12	63.544	-0.634758	0.261261	-2.4296	0.0151156	0.149134
ENSG00000112096	SOD2	669.282	-0.319359	0.131435	-2.42979	0.0151078	0.149134
ENSG00000075407	ZNF37A	597.968	-0.347168	0.142977	-2.42814	0.0151765	0.149622
ENSG00000160179	ABCG1	140.031	0.439296	0.181085	2.42591	0.0152702	0.150347
ENSG00000163823	CCR1	48.7389	0.66605	0.274564	2.42585	0.0152726	0.150347
ENSG00000261188	CTA-445C9.14	73.0133	-0.558452	0.230357	-2.42429	0.0153382	0.150881
ENSG00000133794	ARNTL	78.6721	0.574033	0.236847	2.42364	0.0153657	0.15093
ENSG00000275793	RIMBP3	23.6681	1.0016	0.413264	2.42364	0.015366	0.15093
ENSG00000168615	ADAM9	223.069	0.402909	0.166288	2.42296	0.0153948	0.151034
ENSG00000233560	KRT8P39	23.0916	-1.03348	0.426555	-2.42285	0.0153993	0.151034
ENSG00000135074	ADAM19	224.744	0.452024	0.186593	2.42251	0.0154138	0.151064
ENSG00000179862	CITED4	825.016	-0.379549	0.156752	-2.42133	0.0154637	0.151204
ENSG00000173812	EIF1	16047.5	-0.231472	0.095581	-2.42173	0.0154467	0.151204
ENSG00000272277	RP1-40E16.12	32.1065	-0.821406	0.33927	-2.4211	0.0154737	0.151204
ENSG00000242071	RPL7AP6	604.576	0.3085	0.127414	2.42124	0.0154678	0.151204
ENSG00000135390	ATP5G2	9121.94	0.262524	0.108451	2.42067	0.0154919	0.151271
ENSG00000178585	CTNNBIP1	1009.19	0.26662	0.110197	2.41948	0.0155426	0.151471
ENSG00000167930	FAM234A	2150.75	0.264753	0.109416	2.4197	0.0155334	0.151471
ENSG00000233695	GAS6-AS1	640.492	-0.331091	0.136894	-2.41859	0.0155808	0.151471
ENSG00000175087	PDIK1L	161.737	-0.474838	0.196327	-2.41861	0.0155801	0.151471
ENSG00000063176	SPHK2	691.536	-0.344634	0.142492	-2.41863	0.0155793	0.151471
ENSG00000166471	TMEM41B	325.123	0.359623	0.148646	2.41932	0.0155495	0.151471
ENSG00000100554	ATP6V1D	757.738	0.282164	0.116794	2.41591	0.0156961	0.152218
ENSG00000277632	CCL3	66.7517	0.694505	0.287675	2.4142	0.0157697	0.152218
ENSG00000109854	HTATIP2	78.0461	-0.551897	0.228461	-2.41571	0.0157044	0.152218
ENSG00000186049	KRT73	61.4132	-0.600756	0.248931	-2.41335	0.0158068	0.152218
ENSG00000136802	LRRC8A	789.05	0.298977	0.12379	2.4152	0.0157264	0.152218
ENSG00000037897	METTL1	431.428	-0.31956	0.132335	-2.41478	0.0157448	0.152218
ENSG00000266709	RP11-214O1.2	82.0404	-0.527114	0.218131	-2.4165	0.0156705	0.152218
ENSG00000220472	RP11-69L16.5	231.313	0.394713	0.163516	2.4139	0.0157828	0.152218
ENSG00000184178	SCFD2	344.006	-0.348879	0.144547	-2.41361	0.0157954	0.152218
ENSG00000093183	SEC22C	698.745	0.296788	0.122953	2.41383	0.0157856	0.152218
ENSG00000002919	SNX11	945.422	0.31777	0.131578	2.41506	0.0157327	0.152218
ENSG00000130511	SSBP4	2092.37	-0.304717	0.126246	-2.41369	0.0157921	0.152218
ENSG00000187607	ZNF286A	41.8431	-0.704119	0.291706	-2.41379	0.0157875	0.152218
ENSG00000101986	ABCD1	371.408	0.334553	0.138686	2.4123	0.0158523	0.152421
ENSG00000089472	HEPH	75.8554	0.572726	0.237453	2.41196	0.0158672	0.152421
ENSG00000164081	TEX264	1289.68	-0.281462	0.116671	-2.41244	0.015846	0.152421
ENSG00000132478	UNK	829.755	0.272614	0.113033	2.4118	0.0158739	0.152421
ENSG00000136156	ITM2B	3883.75	0.28828	0.119585	2.41067	0.0159234	0.152786
ENSG00000107833	NPM3	2414.35	-0.281063	0.116613	-2.41022	0.0159428	0.152862
ENSG00000151929	BAG3	186.482	-0.453149	0.188134	-2.40865	0.0160116	0.153411
ENSG00000115317	HTRA2	828.541	-0.296625	0.12318	-2.40807	0.016037	0.153543
ENSG00000118518	RNF146	257.252	0.464843	0.193103	2.40723	0.0160739	0.153786
ENSG00000277283	RP1-267D11.6	80.2028	-0.567777	0.235907	-2.40678	0.0160938	0.153865
ENSG00000158402	CDC25C	176.585	0.417108	0.17347	2.4045	0.0161944	0.154716
ENSG00000143622	RIT1	506.953	0.303559	0.126298	2.40352	0.0162383	0.155023
ENSG00000125449	ARMC7	598.443	0.29134	0.121256	2.40269	0.0162752	0.155263
ENSG00000109906	ZBTB16	1137.07	-0.327553	0.136546	-2.39884	0.0164471	0.156791
ENSG00000236824	BCYRN1	203.794	-0.499983	0.208492	-2.39809	0.0164806	0.156998
ENSG00000180758	GPR157	22.5299	0.993077	0.414171	2.39775	0.0164963	0.157034
ENSG00000165271	NOL6	1451.7	-0.308678	0.128771	-2.39711	0.0165251	0.157195
ENSG00000215417	MIR17HG	81.5644	-0.567597	0.236837	-2.39657	0.0165493	0.157201
ENSG00000095370	SH2D3C	711.622	0.318516	0.13289	2.39683	0.0165376	0.157201
ENSG00000162368	CMPK1	1802.85	-0.296238	0.123631	-2.39615	0.0165682	0.157267
ENSG00000212978	AC016747.3	333.347	0.356806	0.149066	2.39361	0.0166834	0.157348
ENSG00000185905	C16orf54	1034.01	0.324587	0.135569	2.39427	0.0166536	0.157348
ENSG00000132016	C19orf57	101.682	-0.518057	0.216323	-2.39483	0.0166281	0.157348
ENSG00000277972	CISD3	1103.02	-0.38351	0.160202	-2.39392	0.0166694	0.157348
ENSG00000247400	DNAJC3-AS1	52.3267	-0.655673	0.273912	-2.39374	0.0166777	0.157348
ENSG00000128951	DUT	4892.6	-0.23692	0.0989558	-2.3942	0.0166566	0.157348
ENSG00000105429	MEGF8	944.62	-0.324151	0.135393	-2.39415	0.016659	0.157348
ENSG00000189266	PNRC2	1890.84	0.269016	0.112307	2.39537	0.0166035	0.157348
ENSG00000146223	RPL7L1	6209.87	-0.228248	0.0953142	-2.39469	0.0166343	0.157348
ENSG00000132510	KDM6B	502.429	0.339063	0.141706	2.39273	0.0167237	0.157616
ENSG00000198598	MMP17	252.853	-0.377919	0.157964	-2.39243	0.016737	0.15763
ENSG00000135823	STX6	454.189	0.309354	0.129396	2.39076	0.0168136	0.158239
ENSG00000229989	MIR181A1HG	57.5766	-0.70742	0.295932	-2.39048	0.0168262	0.158245
ENSG00000140854	KATNB1	1532.74	-0.267106	0.111773	-2.38972	0.016861	0.15846
ENSG00000174628	IQCK	39.4322	0.716712	0.300022	2.38887	0.0169005	0.158607
ENSG00000132406	TMEM128	304.086	-0.418715	0.175265	-2.38904	0.0168923	0.158607
ENSG00000147454	SLC25A37	500.776	-0.315379	0.132104	-2.38736	0.0169699	0.159146
ENSG00000182473	EXOC7	2138.17	-0.264036	0.11065	-2.38623	0.0170221	0.159522
ENSG00000287070		41.7593	-0.782407	0.328008	-2.38533	0.017064	0.159802
ENSG00000169814	BTD	236.935	0.361507	0.151583	2.38488	0.0170848	0.159804
ENSG00000185112	FAM43A	543.809	-0.323116	0.135489	-2.3848	0.0170883	0.159804
ENSG00000198010	DLGAP2	37.7068	0.721973	0.302815	2.3842	0.0171162	0.159952
ENSG00000234432	RP11-1275H24.1	81.1824	-0.547662	0.229802	-2.38319	0.0171632	0.160278
ENSG00000233476	EEF1A1P6	714.858	0.315934	0.132657	2.3816	0.0172378	0.16047
ENSG00000244026	FAM86DP	305.484	-0.362794	0.152339	-2.38149	0.0172429	0.16047
ENSG00000188878	FBF1	190.439	-0.398869	0.167463	-2.38183	0.017227	0.16047
ENSG00000131242	RAB11FIP4	180.812	0.427931	0.179698	2.38139	0.0172473	0.16047
ENSG00000117090	SLAMF1	59.2078	0.593553	0.249192	2.38191	0.0172232	0.16047
ENSG00000221923	ZNF880	199.656	0.39959	0.16781	2.3812	0.0172563	0.16047
ENSG00000188735	TMEM120B	329.259	-0.329995	0.138627	-2.38044	0.0172919	0.160689
ENSG00000117586	TNFSF4	70.7851	0.576391	0.242216	2.37965	0.017329	0.160921
ENSG00000118655	DCLRE1B	509.689	0.33652	0.141453	2.37903	0.0173585	0.161082
ENSG00000172732	MUS81	834.897	-0.286635	0.120652	-2.37573	0.0175144	0.16226
ENSG00000154611	PSMA8	26.8279	-0.85487	0.359821	-2.37582	0.0175098	0.16226
ENSG00000173875	ZNF791	380.231	0.345522	0.145448	2.37557	0.0175221	0.16226
ENSG00000064601	CTSA	4729	0.23218	0.0977674	2.37482	0.0175576	0.162443
ENSG00000104388	RAB2A	1280.26	0.262055	0.110356	2.37463	0.0175664	0.162443
ENSG00000185963	BICD2	919.819	0.2804	0.11811	2.37406	0.0175937	0.162583
ENSG00000205336	ADGRG1	605.942	-0.289582	0.121999	-2.37365	0.0176133	0.16265
ENSG00000204054	LINC00963	1340.62	-0.289071	0.121814	-2.37305	0.0176417	0.162799
ENSG00000181513	ACBD4	171.515	-0.468041	0.197283	-2.37243	0.0176715	0.162961
ENSG00000101544	ADNP2	864.227	0.290189	0.122345	2.37188	0.0176979	0.163091
ENSG00000164442	CITED2	3690.65	0.281286	0.118606	2.37159	0.0177116	0.163104
ENSG00000269837	IPO5P1	149.336	-0.436121	0.183965	-2.37068	0.0177553	0.163393
ENSG00000187601	MAGEH1	143.632	-0.437487	0.184578	-2.3702	0.0177786	0.163494
ENSG00000119711	ALDH6A1	163.598	0.395284	0.166894	2.36848	0.0178615	0.164143
ENSG00000198909	MAP3K3	973.458	0.268984	0.113607	2.36767	0.0179003	0.164271
ENSG00000116691	MIIP	865.008	-0.366729	0.154878	-2.36786	0.0178913	0.164271
ENSG00000126003	PLAGL2	864.231	0.344848	0.145777	2.36558	0.0180018	0.164975
ENSG00000100028	SNRPD3	1272.5	-0.263264	0.111284	-2.36569	0.0179966	0.164975
ENSG00000213280	RP11-212P7.1	53.0935	0.750647	0.317451	2.36461	0.018049	0.165179
ENSG00000160999	SH2B2	144.847	0.445771	0.188506	2.36476	0.018042	0.165179
ENSG00000130813	C19orf66	486.811	-0.29481	0.124745	-2.36329	0.0181134	0.165601
ENSG00000273338	RP11-386I14.4	21.0479	-0.985501	0.417027	-2.36316	0.01812	0.165601
ENSG00000129925	TMEM8A	1078.43	0.309338	0.130963	2.36203	0.0181751	0.16599
ENSG00000035664	DAPK2	35.7302	0.731024	0.309541	2.36164	0.0181945	0.166053
ENSG00000156140	ADAMTS3	74.8046	-0.538216	0.228016	-2.36043	0.0182536	0.166135
ENSG00000271918	CTD-2287O16.5	36.8428	-0.751318	0.318276	-2.36058	0.0182462	0.166135
ENSG00000204388	HSPA1B	262.866	0.855026	0.362166	2.36087	0.0182322	0.166135
ENSG00000123358	NR4A1	32.6192	0.842711	0.356991	2.36059	0.0182457	0.166135
ENSG00000148848	ADAM12	462.074	-0.308551	0.130737	-2.3601	0.0182701	0.166171
ENSG00000139278	GLIPR1	1846.58	0.253078	0.10726	2.35948	0.0183003	0.166333
ENSG00000118564	FBXL5	563.948	0.304854	0.129276	2.35816	0.0183658	0.166753
ENSG00000170873	MTSS1	316.024	0.344557	0.14612	2.35804	0.0183718	0.166753
ENSG00000100591	AHSA1	3449.16	-0.262392	0.111288	-2.35776	0.0183854	0.166763
ENSG00000160049	DFFA	4521.54	-0.266251	0.11296	-2.35705	0.0184209	0.166971
ENSG00000183049	CAMK1D	524.809	0.323093	0.137147	2.35581	0.0184824	0.167345
ENSG00000112282	MED23	368.178	0.332563	0.141188	2.35546	0.0185	0.167345
ENSG00000161179	YDJC	1534.77	-0.315657	0.133998	-2.35569	0.0184884	0.167345
ENSG00000126106	TMEM53	36.4295	0.71347	0.303176	2.35332	0.0186066	0.168195
ENSG00000140450	ARRDC4	279.197	0.34075	0.144846	2.35249	0.018648	0.168454
ENSG00000143476	DTL	1331.61	0.269918	0.114843	2.35033	0.0187567	0.169321
ENSG00000103254	FAM173A	507.783	-0.397334	0.169209	-2.34818	0.0188653	0.170185
ENSG00000150556	LYPD6B	35.0573	0.7602	0.323856	2.34734	0.018908	0.170454
ENSG00000116663	FBXO6	207.12	-0.392666	0.167303	-2.34704	0.0189231	0.170475
ENSG00000140455	USP3	774.33	0.289781	0.123505	2.34632	0.0189599	0.170691
ENSG00000081913	PHLPP1	314.809	0.339013	0.144529	2.34564	0.0189943	0.170769
ENSG00000224870	RP4-758J18.2	818.159	-0.390547	0.166489	-2.34579	0.018987	0.170769
ENSG00000183486	MX2	52.6363	0.620283	0.264535	2.3448	0.0190371	0.171038
ENSG00000200795	RNU4-1	49.2274	1.46666	0.625777	2.34375	0.0190912	0.171408
ENSG00000196535	MYO18A	1850.83	-0.264757	0.113035	-2.34226	0.0191674	0.17187
ENSG00000149923	PPP4C	3611.5	-0.364229	0.155505	-2.34224	0.0191686	0.17187
ENSG00000220205	VAMP2	1061.87	-0.325901	0.139193	-2.34136	0.0192139	0.17216
ENSG00000080298	RFX3	55.7511	0.589866	0.25199	2.34083	0.0192408	0.172285
ENSG00000185115	NSMCE3	419.954	0.349937	0.14965	2.33836	0.0193684	0.173193
ENSG00000073584	SMARCE1	101.937	0.505801	0.216304	2.33838	0.0193674	0.173193
ENSG00000112787	FBRSL1	1966.92	-0.279751	0.119649	-2.3381	0.0193821	0.173199
ENSG00000184277	TM2D3	248.06	-0.372549	0.159408	-2.33708	0.0194348	0.173553
ENSG00000004468	CD38	111.62	0.454622	0.194633	2.33579	0.0195023	0.173922
ENSG00000108819	PPP1R9B	3294.82	-0.278516	0.119237	-2.33581	0.019501	0.173922
ENSG00000104524	PYCRL	661.142	-0.37659	0.161255	-2.33537	0.0195243	0.174001
ENSG00000161267	BDH1	1551.14	-0.245322	0.105066	-2.33492	0.0195475	0.174091
ENSG00000147813	NAPRT	1072.5	-0.354345	0.151777	-2.33465	0.0195618	0.174102
ENSG00000177427	MIEF2	167.374	0.444432	0.190394	2.33428	0.0195813	0.174158
ENSG00000124406	ATP8A1	110.359	-0.513905	0.220183	-2.33399	0.0195961	0.174173
ENSG00000244734	HBB	20.9767	0.93612	0.401133	2.33369	0.0196121	0.174198
ENSG00000235919	ASH1L-AS1	152.357	-0.4177	0.17905	-2.33287	0.0196552	0.174228
ENSG00000015676	NUDCD3	576.537	-0.277801	0.119061	-2.33326	0.0196343	0.174228
ENSG00000213553	RPLP0P6	944.051	0.294897	0.126417	2.33273	0.0196621	0.174228
ENSG00000134802	SLC43A3	3464.71	-0.229207	0.098262	-2.33261	0.0196686	0.174228
ENSG00000055483	USP36	1729.36	-0.240218	0.102993	-2.33237	0.0196811	0.174228
ENSG00000099875	MKNK2	1856.82	-0.284495	0.121992	-2.33208	0.0196966	0.174249
ENSG00000023445	BIRC3	39.7965	0.68678	0.294649	2.33084	0.0197618	0.174709
ENSG00000110987	BCL7A	749.267	-0.269651	0.115715	-2.33031	0.01979	0.174842
ENSG00000100485	SOS 2	216.58	0.396322	0.170138	2.32941	0.0198374	0.175144
ENSG00000185049	NELFA	657.561	0.334595	0.143743	2.32772	0.0199268	0.175817
ENSG00000135439	AGAP2	925.703	-0.287745	0.123747	-2.32527	0.0200578	0.176477
ENSG00000251131	CTD-2035E11.3	26.813	-0.843599	0.362816	-2.32515	0.0200641	0.176477
ENSG00000145730	PAM	530.83	0.331419	0.142511	2.32557	0.0200415	0.176477
ENSG00000117602	RCAN3	157.156	0.396473	0.17048	2.32563	0.0200382	0.176477
ENSG00000198551	ZNF627	201	0.409705	0.176212	2.32507	0.0200681	0.176477
ENSG00000168724	DNAJC21	1615.9	-0.234028	0.100669	-2.32473	0.0200866	0.176523
ENSG00000185338	SOCS1	95.1571	0.502873	0.216369	2.32415	0.0201177	0.176679
ENSG00000184900	SUMO3	4020.17	0.244078	0.105077	2.32286	0.0201869	0.177169
ENSG00000111196	MAGOHB	647.972	-0.295075	0.127074	-2.32207	0.020229	0.177267
ENSG00000262877	RP11-1055B8.4	21.7351	-0.986309	0.424704	-2.32234	0.0202144	0.177267
ENSG00000197122	SRC	416.198	0.315847	0.136029	2.32191	0.020238	0.177267
ENSG00000132481	TRIM47	135.429	-0.432357	0.186328	-2.32041	0.0203189	0.177857
ENSG00000204856	FAM216A	807.733	-0.267678	0.115371	-2.32016	0.0203324	0.177858
ENSG00000116685	KIAA2013	1831.07	-0.258547	0.111456	-2.31973	0.0203555	0.177943
ENSG00000130779	CLIP1	546.507	0.329207	0.14195	2.31917	0.020386	0.178092
ENSG00000161544	CYGB	26.5787	0.820609	0.354041	2.31784	0.0204581	0.178605
ENSG00000121895	TMEM156	171.459	0.384804	0.166066	2.31718	0.020494	0.1788
ENSG00000100207	TCF20	825.957	0.275042	0.11872	2.31672	0.0205191	0.178902
ENSG00000137486	ARRB1	1640.99	-0.264229	0.114073	-2.31632	0.020541	0.178975
ENSG00000171223	JUNB	3112.84	0.316841	0.136839	2.31544	0.0205889	0.179083
ENSG00000198744	MTCO3P12	161.097	0.41776	0.180431	2.31535	0.0205939	0.179083
ENSG00000116095	PLEKHA3	321.971	0.336122	0.145142	2.31582	0.020568	0.179083
ENSG00000160712	IL6R	4411.95	0.256271	0.110713	2.31474	0.0206273	0.179256
ENSG00000013288	MAN2B2	1076.45	0.28182	0.121786	2.31407	0.0206641	0.179458
ENSG00000105700	KXD1	2136.62	-0.255613	0.110562	-2.31195	0.0207804	0.180026
ENSG00000100030	MAPK1	1906.61	0.283684	0.122672	2.31254	0.0207482	0.180026
ENSG00000105887	MTPN	1203.32	0.274316	0.118644	2.31209	0.0207725	0.180026
ENSG00000168939	SPRY3	22.0557	0.897394	0.388205	2.31165	0.0207972	0.180026
ENSG00000086666	ZFAND6	1138.16	0.263575	0.114009	2.31189	0.0207839	0.180026
ENSG00000275927	RP11-567P19.1	23.9767	-0.88943	0.384984	-2.31031	0.0208713	0.180549
ENSG00000131196	NFATC1	455.563	0.287039	0.124307	2.30911	0.0209373	0.180776
ENSG00000157045	NTAN1	494.823	0.313864	0.135925	2.30909	0.0209384	0.180776
ENSG00000169762	TAPT1	701.307	-0.290087	0.125626	-2.30913	0.0209361	0.180776
ENSG00000224321	RPL12P14	45.9722	0.664408	0.287768	2.30883	0.0209531	0.180786
ENSG00000167601	AXL	46.5515	0.650451	0.281824	2.308	0.0209991	0.180973
ENSG00000185716	C16orf52	127.468	0.431436	0.186955	2.3077	0.0210157	0.180973
ENSG00000109046	WSB1	2097.71	0.23153	0.100323	2.30785	0.0210073	0.180973
ENSG00000165684	SNAPC4	698.124	-0.293584	0.127254	-2.30706	0.0210514	0.181162
ENSG00000143457	GOLPH3L	512.015	0.297988	0.129216	2.30612	0.021104	0.181497
ENSG00000213468	FIRRE	153.221	-0.41921	0.181806	-2.30581	0.0211214	0.181529
ENSG00000138175	ARL 3.00	526.386	0.333317	0.144621	2.30476	0.0211801	0.181798
ENSG00000213626	LBH	29.1417	0.792404	0.343789	2.30492	0.0211713	0.181798
ENSG00000162819	BROX	633.041	0.26956	0.117024	2.30346	0.0212528	0.181994
ENSG00000174946	GPR171	63.0331	0.570608	0.247753	2.30313	0.0212715	0.181994
ENSG00000080854	IGSF9B	46.8071	-0.653988	0.28387	-2.30383	0.0212322	0.181994
ENSG00000131650	KREMEN2	23.087	-0.894918	0.388565	-2.30314	0.0212711	0.181994
ENSG00000075131	TIPIN	557.809	-0.27876	0.12103	-2.30322	0.0212662	0.181994
ENSG00000168564	CDKN2AIP	773.229	-0.293485	0.127443	-2.30287	0.0212862	0.182002
ENSG00000162645	GBP2	90.5887	0.49334	0.214396	2.30107	0.0213875	0.182633
ENSG00000115415	STAT1	1186.46	-0.284072	0.123447	-2.30117	0.0213823	0.182633
ENSG00000163933	RFT1	729.049	-0.304572	0.1324	-2.30039	0.0214262	0.182846
ENSG00000157426	AASDH	278.099	0.33689	0.146466	2.30012	0.0214416	0.18286
ENSG00000230797	YY2	25.7187	-0.848132	0.368826	-2.29954	0.021474	0.183019
ENSG00000103381	CPPED1	747.765	0.262911	0.114436	2.29744	0.0215936	0.183651
ENSG00000077782	FGFR1	492.106	0.295237	0.128517	2.29727	0.0216036	0.183651
ENSG00000142102	PGGHG	220.299	-0.395163	0.171999	-2.29748	0.0215916	0.183651
ENSG00000179833	SERTAD2	973.743	0.261361	0.113764	2.2974	0.0215961	0.183651
ENSG00000137822	TUBGCP4	993.117	-0.284398	0.123814	-2.29697	0.0216202	0.183675
ENSG00000245060	LINC00847	159.082	0.49595	0.215949	2.29661	0.0216413	0.183736
ENSG00000244300	GATA2-AS1	195.767	-0.385319	0.167922	-2.29463	0.0217543	0.184349
ENSG00000160447	PKN3	955.52	-0.274506	0.119612	-2.29497	0.021735	0.184349
ENSG00000164897	TMUB1	667.011	-0.351716	0.153279	-2.29462	0.0217552	0.184349
ENSG00000274736	CCL23	61.5988	0.562879	0.245396	2.29376	0.0218041	0.184529
ENSG00000103257	SLC7A5	4495.6	-0.255931	0.111575	-2.2938	0.0218019	0.184529
ENSG00000076108	BAZ2A	1859.21	0.285987	0.124703	2.29335	0.021828	0.184613
ENSG00000156127	BATF	308.562	-0.433865	0.189415	-2.29055	0.0219894	0.185623
ENSG00000095066	HOOK2	326.406	-0.331955	0.144913	-2.29072	0.0219799	0.185623
ENSG00000160094	ZNF362	708.727	0.30664	0.133865	2.29066	0.0219831	0.185623
ENSG00000143641	GALNT2	2622.08	-0.260733	0.11387	-2.28974	0.0220363	0.185684
ENSG00000206053	HN1L	2772.93	0.247709	0.108163	2.29014	0.0220131	0.185684
ENSG00000089289	IGBP1	1319.13	0.241466	0.105469	2.28946	0.0220526	0.185684
ENSG00000167721	TSR1	2836.72	-0.228281	0.0996993	-2.2897	0.0220388	0.185684
ENSG00000213445	SIPA1	2110.43	-0.276434	0.120765	-2.28902	0.022078	0.18578
ENSG00000101361	NOP56	10749.8	-0.291039	0.127179	-2.28843	0.0221125	0.185845
ENSG00000081665	ZNF506	317.651	0.309432	0.135217	2.28841	0.0221138	0.185845
ENSG00000165406	MARCH8	240.536	0.366931	0.160389	2.28776	0.0221515	0.185927
ENSG00000154359	LONRF1	168.886	-0.444597	0.194336	-2.28778	0.0221504	0.185927
ENSG00000111145	ELK3	644.573	0.289732	0.126692	2.28691	0.0222013	0.186227
ENSG00000286522		20.9956	0.967525	0.423396	2.28515	0.0223038	0.186969
ENSG00000235106	LINC00094	268.186	0.344139	0.15062	2.28482	0.0223231	0.187013
ENSG00000179021	C3orf38	592.39	0.277254	0.121465	2.28259	0.0224544	0.187734
ENSG00000136280	CCM2	1298.31	-0.273325	0.119766	-2.28216	0.02248	0.187734
ENSG00000176407	KCMF1	1597.62	0.235264	0.10307	2.28256	0.0224561	0.187734
ENSG00000232671	RP11-126K1.2	24.0938	0.94377	0.413502	2.28238	0.0224669	0.187734
ENSG00000120889	TNFRSF10B	2123.69	0.28128	0.12321	2.28294	0.022434	0.187734
ENSG00000085185	BCORL1	422.393	0.365614	0.160264	2.28133	0.0225291	0.188026
ENSG00000172493	AFF1	544.686	0.310308	0.136036	2.28107	0.0225441	0.188033
ENSG00000204564	C6orf136	399.197	0.311089	0.136402	2.28068	0.0225672	0.188108
ENSG00000161681	SHANK1	68.0312	-0.601531	0.263841	-2.2799	0.0226137	0.188377
ENSG00000083937	CHMP2B	543.761	0.295751	0.129778	2.27891	0.0226726	0.188585
ENSG00000052802	MSMO1	586.978	0.35921	0.157626	2.27888	0.0226743	0.188585
ENSG00000204604	ZNF468	201.95	0.383245	0.168182	2.27876	0.0226814	0.188585
ENSG00000111358	GTF2H3	921.049	-0.269884	0.118489	-2.27771	0.0227438	0.188868
ENSG00000125648	SLC25A23	341.129	0.349749	0.15354	2.27791	0.0227322	0.188868
ENSG00000214199	EEF1A1P12	167.797	0.413715	0.181666	2.27734	0.0227658	0.188932
ENSG00000011198	ABHD5	288.906	-0.319945	0.140521	-2.27685	0.0227951	0.189057
ENSG00000033800	PIAS1	1015.89	0.270022	0.118658	2.27564	0.0228677	0.189541
ENSG00000123485	HJURP	638.225	0.32069	0.140942	2.27534	0.0228856	0.18957
ENSG00000115421	PAPOLG	208.768	0.443485	0.194936	2.27503	0.0229042	0.189606
ENSG00000158604	TMED4	455.419	0.31341	0.137788	2.27458	0.0229314	0.189713
ENSG00000142961	MOB3C	211.725	0.361501	0.159014	2.2734	0.0230023	0.190181
ENSG00000171084	FAM86JP	32.9414	-0.73899	0.325178	-2.27257	0.0230521	0.190356
ENSG00000175309	PHYKPL	779.512	-0.2841	0.125005	-2.27271	0.0230436	0.190356
ENSG00000159200	RCAN1	304.837	-0.330396	0.145492	-2.27089	0.0231539	0.191077
ENSG00000100577	GSTZ1	889.817	0.300766	0.13248	2.27027	0.023191	0.191162
ENSG00000230989	HSBP1	2332.11	-0.247727	0.109119	-2.27024	0.023193	0.191162
ENSG00000163093	BBS5	85.473	-0.519465	0.228954	-2.26887	0.0232765	0.191607
ENSG00000160703	NLRX1	787.48	-0.267149	0.117766	-2.26848	0.0232999	0.191607
ENSG00000150687	PRSS23	35.5613	0.725995	0.320018	2.26861	0.0232921	0.191607
ENSG00000145817	YIPF5	442.506	0.287855	0.126898	2.2684	0.0233047	0.191607
ENSG00000198824	CHAMP1	677.893	0.307062	0.13546	2.2668	0.0234023	0.192259
ENSG00000125510	OPRL1	123.394	-0.435501	0.192147	-2.2665	0.0234208	0.192259
ENSG00000243667	WDR92	151.861	-0.425798	0.187875	-2.26639	0.0234275	0.192259
ENSG00000117091	CD48	166.194	0.387457	0.171039	2.26532	0.0234931	0.192678
ENSG00000168397	ATG4B	1980.95	-0.242871	0.107291	-2.26367	0.0235942	0.193254
ENSG00000059588	TARBP1	548.077	-0.307057	0.135658	-2.26347	0.023607	0.193254
ENSG00000131002	TXLNGY	573.186	-0.293737	0.129756	-2.26376	0.0235889	0.193254
ENSG00000198464	ZNF480	335.928	0.335921	0.148451	2.26284	0.0236456	0.193451
ENSG00000110442	COMMD9	1376.52	-0.249935	0.110494	-2.26198	0.0236986	0.193765
ENSG00000107362	ABHD17B	406.904	0.311446	0.137745	2.26103	0.0237573	0.193793
ENSG00000100243	CYB5R3	2999.34	0.255157	0.112832	2.26138	0.0237356	0.193793
ENSG00000143819	EPHX1	402.158	0.2935	0.129793	2.26129	0.0237416	0.193793
ENSG00000173914	RBM4B	414.356	0.299026	0.132255	2.26098	0.0237604	0.193793
ENSG00000162496	DHRS3	266.428	0.361521	0.15998	2.25978	0.0238347	0.194279
ENSG00000159720	ATP6V0D1	3896.97	0.228186	0.101058	2.25797	0.0239474	0.194723
ENSG00000140044	JDP2	1077.31	0.279458	0.123789	2.25753	0.0239748	0.194723
ENSG00000102897	LYRM1	308.612	-0.340692	0.150892	-2.25786	0.0239545	0.194723
ENSG00000179832	MROH1	615.532	-0.276371	0.122424	-2.2575	0.0239771	0.194723
ENSG00000073150	PANX2	41.1314	0.672318	0.297709	2.2583	0.0239268	0.194723
ENSG00000025039	RRAGD	1029.83	0.243305	0.107757	2.25791	0.0239511	0.194723
ENSG00000154429	CCSAP	296.699	0.371792	0.164742	2.25681	0.02402	0.194852
ENSG00000196205	EEF1A1P5	2523.47	0.30459	0.134967	2.25677	0.0240225	0.194852
ENSG00000101079	NDRG3	614.641	-0.273043	0.12107	-2.25524	0.0241184	0.19551
ENSG00000075240	GRAMD4	1372.91	-0.367463	0.163014	-2.25418	0.0241846	0.195928
ENSG00000166971	AKTIP	89.6745	0.50466	0.224028	2.25267	0.0242802	0.196104
ENSG00000104983	CCDC61	345.442	-0.379538	0.168421	-2.2535	0.0242276	0.196104
ENSG00000116133	DHCR24	5226.05	0.253823	0.112644	2.25332	0.024239	0.196104
ENSG00000151208	DLG5	431.778	0.308344	0.13688	2.25267	0.02428	0.196104
ENSG00000116701	NCF2	681.355	0.30878	0.13705	2.25304	0.0242564	0.196104
ENSG00000130340	SNX9	114.856	0.450474	0.200056	2.25174	0.0243389	0.196458
ENSG00000261474	RP11-452L6.1	26.3598	-0.829143	0.368268	-2.25147	0.0243559	0.196476
ENSG00000122126	OCRL	313.247	0.373593	0.166042	2.24999	0.0244493	0.197024
ENSG00000011405	PIK3C2A	207.466	0.373851	0.166161	2.24993	0.0244535	0.197024
ENSG00000116044	NFE2L2	1104.91	0.255031	0.113369	2.24957	0.024476	0.197085
ENSG00000182919	C11orf54	151.209	-0.410181	0.182371	-2.24915	0.0245028	0.197182
ENSG00000198715	GLMP	357.56	0.308955	0.137441	2.24792	0.0245814	0.19768
ENSG00000166963	MAP1A	569.891	-0.362425	0.161242	-2.24771	0.0245946	0.19768
ENSG00000069399	BCL3	1012.84	0.301342	0.134125	2.24673	0.024657	0.198026
ENSG00000170004	CHD3	6865.67	-0.236647	0.105348	-2.24634	0.0246823	0.198026
ENSG00000197183	NOL4L	504.778	0.311729	0.138772	2.24634	0.0246823	0.198026
ENSG00000144815	NXPE3	367.174	-0.297646	0.132579	-2.24504	0.0247656	0.198403
ENSG00000007062	PROM1	94.7608	-0.503495	0.224248	-2.24526	0.0247514	0.198403
ENSG00000064201	TSPAN32	400.558	-0.352781	0.157147	-2.24491	0.0247742	0.198403
ENSG00000135535	CD164	5161.71	0.254523	0.113445	2.24357	0.02486	0.198659
ENSG00000086015	MAST2	769.482	-0.255363	0.113825	-2.24348	0.024866	0.198659
ENSG00000175782	SLC35E3	280.929	0.317556	0.14152	2.24389	0.0248393	0.198659
ENSG00000115084	SLC35F5	445.103	-0.343363	0.15301	-2.24406	0.0248285	0.198659
ENSG00000102871	TRADD	306.704	-0.36379	0.162221	-2.24256	0.0249251	0.199011
ENSG00000197847	SLC22A20	223.432	0.375284	0.167368	2.24227	0.0249441	0.199043
ENSG00000131023	LATS1	317.456	0.309839	0.138229	2.24149	0.0249941	0.199322
ENSG00000164011	ZNF691	249.421	0.351074	0.156674	2.24079	0.0250398	0.199566
ENSG00000108395	TRIM37	429.835	0.307691	0.137328	2.24055	0.0250553	0.19957
ENSG00000120458	MSANTD2	46.1752	0.627659	0.280168	2.24029	0.0250721	0.199584
ENSG00000125875	TBC1D20	954.609	0.272004	0.12146	2.23946	0.0251262	0.199895
ENSG00000251022	THAP9-AS1	1209.48	-0.246522	0.110093	-2.23923	0.0251413	0.199895
ENSG00000144959	NCEH1	134.327	-0.405192	0.181068	-2.23779	0.0252349	0.200519
ENSG00000136450	SRSF1	1921.64	-0.282554	0.126284	-2.23745	0.0252569	0.200574
ENSG00000075426	FOSL2	1924.78	-0.228331	0.102083	-2.23672	0.0253049	0.200595
ENSG00000266066	POLRMTP1	23.4841	-0.85574	0.382549	-2.23694	0.0252902	0.200595
ENSG00000174915	PTDSS2	1001.77	-0.334561	0.14957	-2.23682	0.0252981	0.200595
ENSG00000120742	SERP1	4353.74	-0.213252	0.095358	-2.23633	0.0253301	0.200643
ENSG00000011600	TYROBP	1023.21	0.323788	0.144796	2.23616	0.0253411	0.200643
ENSG00000179750	APOBEC3B	231.018	0.370636	0.165832	2.235	0.0254172	0.200929
ENSG00000115159	GPD2	688.432	-0.291136	0.130265	-2.23495	0.0254204	0.200929
ENSG00000228205	RP11-778D9.4	142.073	0.413118	0.184847	2.23492	0.0254228	0.200929
ENSG00000104884	ERCC2	904.406	-0.288889	0.129321	-2.23388	0.0254908	0.201113
ENSG00000156469	MTERF3	276.586	0.32236	0.144284	2.23421	0.0254696	0.201113
ENSG00000197744	PTMAP2	190.574	-0.350567	0.156932	-2.23387	0.0254915	0.201113
ENSG00000109220	CHIC2	277.983	0.329981	0.147843	2.23197	0.0256169	0.201982
ENSG00000110848	CD69	97.334	0.477934	0.214242	2.23082	0.0256934	0.202345
ENSG00000197965	MPZL1	638.794	-0.276707	0.12403	-2.23097	0.0256828	0.202345
ENSG00000178175	ZNF366	44.9574	0.659439	0.295719	2.22995	0.0257505	0.202675
ENSG00000176973	FAM89B	44.6533	0.634709	0.28473	2.22916	0.025803	0.202699
ENSG00000208028	MIR616	21.8369	-0.97596	0.437894	-2.22876	0.0258299	0.202699
ENSG00000166881	NEMP1	718.01	0.324516	0.145598	2.22885	0.0258242	0.202699
ENSG00000171840	NINJ2	55.2053	0.582211	0.261225	2.22877	0.0258289	0.202699
ENSG00000055044	NOP58	5279.39	-0.327365	0.146829	-2.22957	0.0257763	0.202699
ENSG00000165288	BRWD3	238.66	0.327331	0.146935	2.22772	0.025899	0.203024
ENSG00000185507	IRF7	413.588	0.320077	0.143682	2.22768	0.025902	0.203024
ENSG00000127586	CHTF18	1097.92	-0.345369	0.155126	-2.22637	0.0259895	0.203076
ENSG00000185291	IL3RA	1367.84	0.240012	0.10782	2.22605	0.0260109	0.203076
ENSG00000198825	INPP5F	227.509	0.331664	0.149012	2.22575	0.026031	0.203076
ENSG00000274422	LL22NC03-2H8.5	227.12	0.388834	0.174677	2.22601	0.0260132	0.203076
ENSG00000183255	PTTG1IP	4304.17	0.239132	0.107438	2.22577	0.0260298	0.203076
ENSG00000110080	ST3GAL4	1059.05	-0.264826	0.11894	-2.22655	0.0259775	0.203076
ENSG00000173334	TRIB1	371.676	0.366377	0.164607	2.22577	0.0260293	0.203076
ENSG00000181896	ZNF101	543.539	0.294791	0.132383	2.2268	0.0259605	0.203076
ENSG00000099991	CABIN1	2107.24	-0.227355	0.10218	-2.22506	0.0260775	0.2032
ENSG00000118689	FOXO3	272.456	0.395893	0.177912	2.22522	0.0260665	0.2032
ENSG00000137936	BCAR3	42.3443	0.675078	0.30345	2.22468	0.0261029	0.203278
ENSG00000152154	TMEM178A	49.5997	0.645163	0.290148	2.22356	0.0261778	0.203742
ENSG00000250182	EEF1A1P13	747.85	0.356255	0.160255	2.22305	0.0262124	0.203859
ENSG00000163803	PLB1	144.826	-0.388527	0.174785	-2.22289	0.0262235	0.203859
ENSG00000285796		54.2564	-0.578422	0.260253	-2.22253	0.0262472	0.203923
ENSG00000064763	FAR2	204.346	-0.359307	0.161763	-2.2212	0.0263376	0.204505
ENSG00000224940	PRRT4	34.8765	-0.703007	0.31658	-2.22063	0.0263762	0.204685
ENSG00000070061	IKBKAP	583.326	-0.317769	0.143171	-2.21951	0.0264523	0.204687
ENSG00000178921	PFAS	1340.55	-0.263603	0.11875	-2.21982	0.0264313	0.204687
ENSG00000137710	RDX	648.925	0.366311	0.165037	2.21957	0.0264481	0.204687
ENSG00000178718	RPP25	403.323	-0.306257	0.137985	-2.21949	0.0264536	0.204687
ENSG00000136059	VILL	282.359	-0.371396	0.167269	-2.22035	0.0263952	0.204687
ENSG00000077348	EXOSC5	1072.46	-0.270249	0.121804	-2.21872	0.0265061	0.204808
ENSG00000119537	KDSR	805.632	-0.269318	0.121404	-2.21835	0.0265309	0.204808
ENSG00000127314	RAP1B	2612.26	0.265537	0.119697	2.21842	0.0265265	0.204808
ENSG00000132386	SERPINF1	85.6563	0.493741	0.222545	2.21861	0.0265129	0.204808
ENSG00000196209	SIRPB2	84.3787	0.473326	0.213391	2.21812	0.0265468	0.204812
ENSG00000068745	IP6K2	1891.55	0.273564	0.123345	2.21788	0.026563	0.204818
ENSG00000111110	PPM1H	24.549	-0.844127	0.380744	-2.21704	0.0266201	0.205138
ENSG00000145685	LHFPL2	340.415	0.375991	0.169616	2.21672	0.0266423	0.20519
ENSG00000117505	DR1	1557.81	-0.226	0.101975	-2.21623	0.0266757	0.205307
ENSG00000198840	MT-ND3	21389.4	0.296333	0.133735	2.21582	0.0267038	0.205307
ENSG00000112531	QKI	895.554	-0.275713	0.124418	-2.21603	0.0266896	0.205307
ENSG00000130810	PPAN	248.239	-0.48326	0.218131	-2.21546	0.0267286	0.205378
ENSG00000103111	MON1B	1529.12	0.240949	0.108804	2.21453	0.0267926	0.205751
ENSG00000180440	SERTM1	47.0801	-0.640917	0.289502	-2.21386	0.0268386	0.205985
ENSG00000136003	ISCU	1262.43	-0.230996	0.104352	-2.21362	0.0268548	0.20599
ENSG00000172037	LAMB2	853.785	-0.289503	0.130818	-2.21302	0.0268961	0.206188
ENSG00000167173	C15orf39	4772.79	-0.227723	0.102931	-2.21239	0.0269398	0.206404
ENSG00000182551	ADI1	4825.93	0.219602	0.0992912	2.21169	0.0269878	0.206652
ENSG00000090989	EXOC1	483.518	0.311212	0.140813	2.2101	0.027098	0.207138
ENSG00000198019	FCGR1B	116.733	-0.449922	0.203575	-2.21011	0.0270978	0.207138
ENSG00000178966	RMI1	324.206	0.341641	0.154576	2.21018	0.0270926	0.207138
ENSG00000146701	MDH2	11270.2	-0.223813	0.1013	-2.20941	0.0271464	0.207268
ENSG00000141524	TMC6	1082.36	-0.252044	0.114067	-2.20962	0.0271315	0.207268
ENSG00000169908	TM4SF1	1035.27	-0.236542	0.107165	-2.20726	0.0272957	0.208289
ENSG00000255823	MTRNR2L8	71.5222	0.539088	0.244263	2.207	0.0273144	0.208311
ENSG00000123136	DDX39A	5964.34	-0.231349	0.10489	-2.20564	0.0274093	0.208916
ENSG00000148297	MED22	1675.45	-0.257462	0.116816	-2.204	0.0275247	0.209674
ENSG00000185485	SDHAP1	236.982	0.341934	0.155184	2.20341	0.0275662	0.209755
ENSG00000200879	SNORD14E	22.3221	-0.938387	0.425882	-2.20339	0.0275669	0.209755
ENSG00000105281	SLC1A5	4766.23	-0.241111	0.109457	-2.2028	0.0276088	0.209953
ENSG00000112149	CD83	181.315	0.357356	0.162251	2.20249	0.027631	0.210002
ENSG00000139436	GIT2	1423.06	0.250393	0.11375	2.20126	0.0277176	0.210419
ENSG00000135002	RFK	445.297	-0.276202	0.125472	-2.2013	0.027715	0.210419
ENSG00000101306	MYLK2	146.878	-0.403648	0.183432	-2.20053	0.0277696	0.210507
ENSG00000136238	RAC1	3777.34	0.255562	0.116121	2.20082	0.0277486	0.210507
ENSG00000100109	TFIP11	1228.81	0.258338	0.117416	2.2002	0.0277926	0.210507
ENSG00000154620	TMSB4Y	67.2863	-0.522622	0.237516	-2.20037	0.0277806	0.210507
ENSG00000117632	STMN1	10604.7	0.221136	0.100521	2.19989	0.0278146	0.210553
ENSG00000251322	SHANK3	300.108	-0.308854	0.140421	-2.19948	0.0278439	0.210655
ENSG00000162642	C1orf52	390.617	0.309897	0.14091	2.19925	0.02786	0.210657
ENSG00000143614	GATAD2B	1121.4	0.253636	0.115408	2.19772	0.0279687	0.211358
ENSG00000197782	ZNF780A	46.1884	0.607418	0.276491	2.19688	0.0280291	0.211694
ENSG00000135457	TFCP2	768.975	-0.277552	0.12637	-2.19635	0.0280667	0.211857
ENSG00000140992	PDPK1	533.249	0.298515	0.135947	2.19582	0.028105	0.212026
ENSG00000280063	RP11-295D4.3	69.434	-0.535498	0.243965	-2.19498	0.0281652	0.212359
ENSG00000163605	PPP4R2	1336.76	0.243804	0.111106	2.19434	0.0282111	0.212585
ENSG00000172889	EGFL7	247.461	-0.434796	0.19839	-2.19162	0.0284068	0.213938
ENSG00000111707	SUDS3	854.537	-0.261192	0.119238	-2.1905	0.0284878	0.214272
ENSG00000176438	SYNE3	1272.74	0.257729	0.117654	2.19057	0.0284826	0.214272
ENSG00000169180	XPO6	3193.68	-0.215964	0.0985983	-2.19034	0.0284996	0.214272
ENSG00000196693	ZNF33B	96.3263	-0.443499	0.202512	-2.18999	0.0285247	0.214339
ENSG00000170296	GABARAP	154.641	0.394654	0.18026	2.18937	0.0285702	0.214553
ENSG00000118596	SLC16A7	180.384	0.385606	0.176144	2.18916	0.0285856	0.214553
ENSG00000163947	ARHGEF3	138.589	0.399639	0.182636	2.18817	0.0286574	0.21492
ENSG00000037280	FLT4	538.048	-0.295766	0.135202	-2.18759	0.0286992	0.21492
ENSG00000074706	IPCEF1	98.1219	0.436628	0.199585	2.18768	0.0286927	0.21492
ENSG00000033178	UBA6	611.019	-0.284703	0.130118	-2.18804	0.0286669	0.21492
ENSG00000134318	ROCK2	753.52	-0.32397	0.148132	-2.18704	0.0287392	0.214977
ENSG00000173638	SLC19A1	1926.95	-0.227854	0.104181	-2.18711	0.0287345	0.214977
ENSG00000178927	C17orf62	2084.62	-0.251791	0.115182	-2.18603	0.0288137	0.215183
ENSG00000186523	FAM86B1	22.7411	-0.851241	0.389405	-2.186	0.0288153	0.215183
ENSG00000132589	FLOT2	2076.2	-0.243184	0.111232	-2.18627	0.0287961	0.215183
ENSG00000124532	MRS2	420.245	-0.317544	0.145284	-2.18568	0.0288389	0.215238
ENSG00000141985	SH3GL1	2168.9	0.264	0.12081	2.18525	0.0288707	0.215308
ENSG00000121741	ZMYM2	1053.54	0.278965	0.127666	2.18511	0.0288808	0.215308
ENSG00000183475	ASB7	269.945	0.335094	0.153369	2.18489	0.028897	0.215308
ENSG00000120137	PANK3	930.731	0.290366	0.132944	2.18412	0.0289531	0.215605
ENSG00000228672	PROB1	183.199	-0.411956	0.188705	-2.18307	0.0290309	0.216063
ENSG00000029364	SLC39A9	1282.84	0.291084	0.133362	2.18266	0.0290611	0.216167
ENSG00000019485	PRDM11	221.8	0.343765	0.157533	2.18218	0.0290964	0.216308
ENSG00000258289	CHURC1	362.718	-0.292842	0.134219	-2.18182	0.0291226	0.216381
ENSG00000172409	CLP 1	455.956	0.282195	0.129432	2.18026	0.0292381	0.216898
ENSG00000076650	GPATCH1	301.64	0.306296	0.140466	2.18056	0.0292158	0.216898
ENSG00000168890	TMEM150A	81.7316	-0.536813	0.24622	-2.18022	0.0292412	0.216898
ENSG00000180667	YOD1	168.457	-0.380735	0.174673	-2.1797	0.0292799	0.217064
ENSG00000157600	TMEM164	2813.93	0.261564	0.120042	2.17895	0.0293356	0.217356
ENSG00000171295	ZNF440	177.528	0.349148	0.160305	2.17802	0.0294045	0.217744
ENSG00000124209	RAB22A	439.216	0.287672	0.132115	2.17744	0.0294474	0.217806
ENSG00000145390	USP53	121.686	0.408771	0.187712	2.17765	0.029432	0.217806
ENSG00000082898	XPO1	3530.22	-0.260758	0.119765	-2.17725	0.029462	0.217806
ENSG00000070814	TCOF1	5308.15	-0.352591	0.161995	-2.17655	0.0295139	0.218068
ENSG00000119699	TGFB3	36.8398	-0.671869	0.309041	-2.17405	0.0297015	0.219332
ENSG00000145391	SETD7	411.337	-0.312404	0.143716	-2.17376	0.0297232	0.21937
ENSG00000112242	E2F3	1216.78	0.263275	0.121201	2.17221	0.0298397	0.2199
ENSG00000140575	IQGAP1	3563.38	0.280053	0.128936	2.17203	0.0298532	0.2199
ENSG00000106330	MOSPD3	84.8124	0.487183	0.224309	2.17193	0.0298613	0.2199
ENSG00000260001	TGFBR3L	30.1075	-0.746858	0.343845	-2.17208	0.0298496	0.2199
ENSG00000187624	C17orf97	98.2849	0.454474	0.209311	2.17129	0.0299093	0.220131
ENSG00000125898	FAM110A	365.214	0.303026	0.139605	2.1706	0.0299615	0.220288
ENSG00000034152	MAP2K3	1089.09	0.245484	0.113096	2.17057	0.0299638	0.220288
ENSG00000128524	ATP6V1F	1172.69	-0.250099	0.115311	-2.1689	0.0300899	0.220643
ENSG00000143889	HNRNPLL	148.787	-0.371299	0.171148	-2.16947	0.0300472	0.220643
ENSG00000139505	MTMR6	432.84	0.285876	0.131786	2.16924	0.0300642	0.220643
ENSG00000069275	NUCKS1	10362	-0.331471	0.152834	-2.16883	0.0300953	0.220643
ENSG00000123595	RAB9A	362.971	0.304958	0.140576	2.16934	0.0300568	0.220643
ENSG00000172716	SLFN11	466.264	0.296022	0.136566	2.16762	0.0301877	0.221199
ENSG00000233723	LINC01122	188.694	-0.360575	0.166369	-2.16732	0.0302108	0.221245
ENSG00000141298	SSH2	514.243	0.281154	0.129751	2.16688	0.0302442	0.221269
ENSG00000182165	TP53TG1	305.425	0.319701	0.147549	2.16674	0.030255	0.221269
ENSG00000035403	VCL	1154.2	0.283156	0.13069	2.16662	0.030264	0.221269
ENSG00000147669	POLR2K	791.966	-0.261474	0.120781	-2.16486	0.0303985	0.22213
ENSG00000134030	CTIF	194.135	-0.35596	0.16446	-2.16442	0.0304323	0.222254
ENSG00000119682	AREL1	841.879	0.282416	0.130562	2.16308	0.0305353	0.222344
ENSG00000177981	ASB8	1009.72	0.239598	0.110774	2.16295	0.0305451	0.222344
ENSG00000107862	GBF1	1207.11	0.262601	0.121386	2.16337	0.0305129	0.222344
ENSG00000100221	JOSD1	1371.83	-0.247288	0.114294	-2.16361	0.030494	0.222344
ENSG00000166224	SGPL1	281.757	0.33188	0.153424	2.16316	0.0305287	0.222344
ENSG00000173545	ZNF622	1204.33	0.264713	0.122335	2.16383	0.0304777	0.222344
ENSG00000119599	DCAF4	258.157	-0.330141	0.152706	-2.16194	0.0306226	0.222786
ENSG00000004059	ARF5	932.863	0.249784	0.115605	2.16066	0.0307212	0.223253
ENSG00000108587	GOSR1	874.444	-0.272489	0.126103	-2.16085	0.0307068	0.223253
ENSG00000113389	NPR 3.00	435.566	-0.28808	0.133342	-2.16046	0.0307373	0.223253
ENSG00000249855	EEF1A1P19	301.04	0.378885	0.175408	2.16002	0.030771	0.223316
ENSG00000138386	NAB1	352.554	-0.28664	0.132709	-2.15991	0.0307796	0.223316
ENSG00000138777	PPA2	1563.78	-0.243936	0.113046	-2.15785	0.0309395	0.224354
ENSG00000164591	MYOZ3	95.488	-0.438188	0.203132	-2.15716	0.0309934	0.224377
ENSG00000262831	RP11-498C9.2	131.721	0.420563	0.194954	2.15724	0.0309868	0.224377
ENSG00000272831	RP11-792A8.4	238.653	-0.359131	0.166477	-2.15725	0.0309866	0.224377
ENSG00000109686	SH3D19	460.619	0.324287	0.150351	2.15688	0.0310154	0.224413
ENSG00000186184	POLR1D	3053.32	-0.217697	0.100943	-2.15663	0.0310346	0.22443
ENSG00000100029	PES 1.00	6927.21	-0.29983	0.139075	-2.15588	0.0310927	0.224728
ENSG00000135828	RNASEL	150.276	0.401884	0.186465	2.15527	0.0311405	0.22495
ENSG00000164253	WDR41	1368.36	-0.237202	0.110084	-2.15474	0.0311823	0.22513
ENSG00000169607	CKAP2L	262.458	0.330633	0.153621	2.15226	0.0313766	0.225327
ENSG00000129173	E2F8	203.397	0.362002	0.168207	2.15213	0.0313875	0.225327
ENSG00000133706	LARS	3215.32	-0.227704	0.105804	-2.15213	0.0313872	0.225327
ENSG00000115318	LOXL3	141.623	-0.424413	0.197075	-2.15357	0.0312741	0.225327
ENSG00000143156	NME7	291.859	-0.323277	0.150135	-2.15324	0.0312999	0.225327
ENSG00000272931	RP5-943J3.2	68.1885	-0.592055	0.275013	-2.15283	0.0313323	0.225327
ENSG00000113387	SUB1	5856.62	0.210545	0.0978051	2.1527	0.0313426	0.225327
ENSG00000072274	TFRC	7805.57	0.274597	0.1276	2.15201	0.0313964	0.225327
ENSG00000116209	TMEM59	2668.27	0.212155	0.0985635	2.15247	0.0313604	0.225327
ENSG00000234782	TPT1P9	124.751	0.393272	0.182689	2.15269	0.0313431	0.225327
ENSG00000213967	ZNF726	217.513	-0.360875	0.167684	-2.15211	0.0313884	0.225327
ENSG00000269352	PTOV1-AS2	151.147	-0.382949	0.17812	-2.14995	0.0315592	0.226374
ENSG00000253710	ALG11	108.14	-0.424783	0.197679	-2.14885	0.0316462	0.226562
ENSG00000113273	ARSB	973.674	0.314665	0.146463	2.14843	0.0316797	0.226562
ENSG00000177191	B3GNT8	391.11	0.304483	0.141681	2.14907	0.0316288	0.226562
ENSG00000218739	CEBPZOS	913.889	-0.244114	0.113687	-2.14725	0.0317733	0.226562
ENSG00000130309	COLGALT1	3417.86	-0.214489	0.0998549	-2.148	0.0317136	0.226562
ENSG00000160213	CSTB	1025.19	0.243073	0.113188	2.14751	0.0317526	0.226562
ENSG00000138061	CYP1B1	35.2473	0.700831	0.326245	2.14817	0.0317001	0.226562
ENSG00000225733	FGD5-AS1	1668.85	0.276041	0.128542	2.14748	0.0317553	0.226562
ENSG00000049860	HEXB	1287.56	0.251723	0.1172	2.1478	0.0317295	0.226562
ENSG00000130723	PRRC2B	4220.68	-0.224031	0.104317	-2.14761	0.0317447	0.226562
ENSG00000170684	ZNF296	166.461	-0.370384	0.17249	-2.14727	0.0317717	0.226562
ENSG00000120910	PPP3CC	288.621	-0.323946	0.150904	-2.14671	0.0318166	0.226627
ENSG00000047644	WWC3	93.2259	-0.455806	0.212317	-2.14682	0.0318073	0.226627
ENSG00000173621	LRFN4	730.376	-0.351058	0.163645	-2.14524	0.0319339	0.22734
ENSG00000164327	RICTOR	431.087	0.32774	0.152807	2.1448	0.031969	0.227469
ENSG00000273344	PAXIP1-AS1	91.8471	-0.45137	0.21051	-2.14418	0.0320187	0.2277
ENSG00000110237	ARHGEF17	271.616	-0.343783	0.16043	-2.14289	0.0321219	0.22809
ENSG00000099251	HSD17B7P2	32.6532	0.725676	0.33865	2.14285	0.0321251	0.22809
ENSG00000046651	OFD1	532.38	-0.292694	0.136569	-2.14319	0.032098	0.22809
ENSG00000083814	ZNF671	377.536	0.309981	0.144677	2.14257	0.0321475	0.228127
ENSG00000101138	CSTF1	1048.19	0.229733	0.107248	2.14206	0.0321884	0.228173
ENSG00000129472	RAB2B	249.495	0.391298	0.182661	2.14221	0.0321766	0.228173
ENSG00000058063	ATP11B	179.231	-0.430743	0.201203	-2.14083	0.0322877	0.228746
ENSG00000171310	CHST11	2561.74	-0.23484	0.109706	-2.14063	0.0323038	0.228746
ENSG00000170385	SLC30A1	453.016	-0.365306	0.170676	-2.14035	0.0323267	0.228787
ENSG00000106344	RBM28	1014.73	-0.231131	0.108075	-2.13861	0.0324669	0.229657
ENSG00000172243	CLEC7A	50.4622	0.562191	0.262984	2.13774	0.0325378	0.229948
ENSG00000172262	ZNF131	734.796	0.250199	0.117042	2.13768	0.0325427	0.229948
ENSG00000066294	CD84	1404.77	0.287159	0.134363	2.13719	0.0325825	0.230106
ENSG00000124731	TREM1	81.0827	0.497306	0.232722	2.13691	0.0326055	0.230146
ENSG00000082212	ME2	1265.4	-0.26568	0.124359	-2.13639	0.0326477	0.230199
ENSG00000150991	UBC	16773.8	-0.279923	0.131024	-2.13643	0.0326446	0.230199
ENSG00000173894	CBX2	583.855	0.334386	0.156649	2.13463	0.0327915	0.231091
ENSG00000122986	HVCN1	213.284	0.332274	0.155707	2.13397	0.0328451	0.231223
ENSG00000117592	PRDX6	5269.61	-0.219329	0.102776	-2.13405	0.0328391	0.231223
ENSG00000151292	CSNK1G3	336.414	-0.313495	0.146948	-2.13338	0.0328939	0.231407
ENSG00000163155	LYSMD1	70.42	0.493922	0.231538	2.13323	0.0329062	0.231407
ENSG00000062194	GPBP1	1535.82	0.222661	0.104403	2.13272	0.0329476	0.231453
ENSG00000151287	TEX30	798.643	0.260746	0.122252	2.13285	0.0329371	0.231453
ENSG00000163714	U2SURP	2960.07	-0.300466	0.140914	-2.13226	0.0329853	0.231596
ENSG00000189060	H1F0	3811.04	-0.289912	0.136029	-2.13125	0.0330684	0.231826
ENSG00000089177	KIF16B	73.6329	-0.490858	0.230296	-2.13142	0.0330547	0.231826
ENSG00000109118	PHF12	817.036	0.290279	0.136203	2.13122	0.0330706	0.231826
ENSG00000166896	ATP23	223.436	-0.340726	0.159994	-2.12962	0.0332029	0.232181
ENSG00000182220	ATP6AP2	1667.08	0.249378	0.117079	2.12999	0.0331724	0.232181
ENSG00000198885	ITPRIPL1	128.43	-0.400599	0.188046	-2.13033	0.0331446	0.232181
ENSG00000049130	KITLG	234.943	0.338784	0.159067	2.12982	0.0331862	0.232181
ENSG00000058600	POLR3E	1041.21	-0.232327	0.109097	-2.12955	0.0332088	0.232181
ENSG00000115419	GLS	712.517	-0.303454	0.142689	-2.12668	0.0334464	0.233473
ENSG00000095261	PSMD5	373.522	0.316633	0.148862	2.12702	0.0334188	0.233473
ENSG00000102178	UBL4A	891.554	-0.24931	0.117229	-2.1267	0.033445	0.233473
ENSG00000196275	GTF2IRD2	104.287	0.484965	0.228074	2.12635	0.0334744	0.233546
ENSG00000128602	SMO	140.743	-0.374214	0.176009	-2.12611	0.0334938	0.233559
ENSG00000244380	RP11-24C3.2	61.1082	0.541068	0.254569	2.12543	0.0335509	0.233834
ENSG00000180539	C9orf139	235.255	-0.322417	0.151745	-2.12472	0.0336096	0.23412
ENSG00000158769	F11R	1811.76	0.252347	0.118798	2.12416	0.033657	0.234328
ENSG00000186480	INSIG1	784.458	-0.250193	0.117849	-2.12301	0.0337534	0.234875
ENSG00000146826	C7orf43	217.136	0.355962	0.167715	2.12242	0.0338025	0.234907
ENSG00000112139	MDGA1	97.3448	0.424841	0.200178	2.12232	0.033811	0.234907
ENSG00000173451	THAP2	63.5707	0.524975	0.247342	2.12246	0.033799	0.234907
ENSG00000104814	MAP4K1	569.028	-0.255509	0.120419	-2.12182	0.0338525	0.235072
ENSG00000167767	KRT80	31.1272	-0.746479	0.351988	-2.12075	0.0339426	0.235451
ENSG00000136560	TANK	452.516	0.275693	0.129994	2.12081	0.0339381	0.235451
ENSG00000177576	C18orf32	39.9788	0.621198	0.293165	2.11894	0.0340956	0.236193
ENSG00000272711	RP11-259N19.1	493.314	-0.308718	0.145701	-2.11885	0.034103	0.236193
ENSG00000134684	YARS	5989.32	-0.199945	0.0943475	-2.11924	0.0340704	0.236193
ENSG00000197785	ATAD3A	3150.66	-0.350118	0.165391	-2.11691	0.0342673	0.236991
ENSG00000178202	KDELC2	849.966	0.257646	0.121712	2.11686	0.0342717	0.236991
ENSG00000108384	RAD51C	504.048	-0.270545	0.127792	-2.11706	0.0342544	0.236991
ENSG00000154358	OBSCN	48.2172	-0.619392	0.292759	-2.1157	0.0343702	0.237548
ENSG00000100354	TNRC6B	1104.92	0.290336	0.137245	2.11545	0.0343917	0.237573
ENSG00000070808	CAMK2A	37.7185	0.663118	0.313616	2.11443	0.0344788	0.238051
ENSG00000215256	DHRS4-AS1	164.176	-0.38848	0.183927	-2.11215	0.0346739	0.23878
ENSG00000228502	EEF1A1P11	382.295	0.354825	0.16801	2.11193	0.0346924	0.23878
ENSG00000166130	IKBIP	389.114	0.271189	0.128368	2.11259	0.0346361	0.23878
ENSG00000106852	LHX6	252.422	-0.33238	0.157317	-2.11281	0.0346172	0.23878
ENSG00000114209	PDCD10	1025.94	0.240364	0.113807	2.11202	0.0346846	0.23878
ENSG00000287649		20.9635	-0.854784	0.404639	-2.11246	0.034647	0.23878
ENSG00000165304	MELK	540.212	0.294453	0.139453	2.11148	0.0347307	0.23892
ENSG00000149782	PLCB3	646.446	-0.287708	0.136317	-2.11057	0.0348089	0.239086
ENSG00000218565	RP11-12A2.1	89.7325	-0.443979	0.210355	-2.11062	0.0348049	0.239086
ENSG00000103194	USP10	1422.33	0.27788	0.131642	2.11088	0.034783	0.239086
ENSG00000185621	LMLN	53.3262	0.54254	0.257087	2.11033	0.0348296	0.239104
ENSG00000108590	MED31	241.343	0.318658	0.151105	2.10885	0.0349576	0.239859
ENSG00000271646	RP11-326I11.3	52.7719	-0.559131	0.265283	-2.10767	0.0350591	0.240431
ENSG00000107736	CDH23	220.069	-0.322413	0.152989	-2.10742	0.0350813	0.240459
ENSG00000225828	FAM229A	156.021	0.365736	0.173706	2.10549	0.0352485	0.24148
ENSG00000186350	RXRA	1623.78	-0.229796	0.109199	-2.10438	0.0353451	0.242017
ENSG00000069966	GNB5	1059.4	0.222319	0.105721	2.10288	0.0354759	0.242503
ENSG00000273802	HIST1H2BG	142.472	-0.406197	0.193183	-2.10265	0.0354963	0.242503
ENSG00000126777	KTN1	3225.91	-0.243167	0.115655	-2.10252	0.0355075	0.242503
ENSG00000065308	TRAM2	429.514	0.301072	0.143167	2.10295	0.0354704	0.242503
ENSG00000141580	WDR45B	1830.92	0.264807	0.125898	2.10335	0.0354354	0.242503
ENSG00000250510	GPR162	265.742	-0.349537	0.166287	-2.102	0.0355528	0.242564
ENSG00000021574	SPAST	549.385	0.270365	0.128616	2.1021	0.0355446	0.242564
ENSG00000202538	RNU4-2	85.2762	1.45102	0.690463	2.10152	0.0355954	0.242729
ENSG00000162980	ARL5A	582.159	-0.30897	0.14705	-2.10112	0.0356305	0.242844
ENSG00000106392	C1GALT1	97.9842	-0.432021	0.205793	-2.0993	0.0357908	0.243811
ENSG00000198888	MT-ND1	70394.4	0.325763	0.155216	2.09877	0.0358376	0.244004
ENSG00000183762	KREMEN1	39.5147	0.620813	0.295853	2.09838	0.0358712	0.244108
ENSG00000278540	ACACA	1166.74	-0.261035	0.124416	-2.09809	0.0358976	0.244163
ENSG00000183647	ZNF530	198.072	0.366283	0.174607	2.09776	0.0359267	0.244236
ENSG00000064989	CALCRL	144.631	0.380661	0.181496	2.09735	0.0359627	0.244355
ENSG00000166401	SERPINB8	871.714	0.258791	0.123564	2.09439	0.0362253	0.246013
ENSG00000103507	BCKDK	1369.02	-0.225784	0.107862	-2.09326	0.0363257	0.246364
ENSG00000109089	CDR2L	23.7365	-0.878602	0.419773	-2.09304	0.0363457	0.246364
ENSG00000229344	MTCO2P12	258.164	0.306278	0.146334	2.093	0.0363488	0.246364
ENSG00000103174	NAGPA	701.312	-0.247364	0.118188	-2.09298	0.0363512	0.246364
ENSG00000170340	B3GNT2	960.058	-0.293877	0.140463	-2.0922	0.036421	0.24661
ENSG00000170486	KRT72	134.132	-0.402933	0.192592	-2.09216	0.0364247	0.24661
ENSG00000071205	ARHGAP10	72.5679	-0.523827	0.250402	-2.09194	0.0364436	0.246612
ENSG00000136098	NEK3	204.092	0.329347	0.157558	2.09032	0.0365893	0.247472
ENSG00000174748	RPL15	39280.5	0.209932	0.100459	2.08974	0.0366411	0.247696
ENSG00000251669	FAM86EP	68.0275	-0.529252	0.25331	-2.08935	0.0366765	0.247809
ENSG00000140451	PIF1	157.271	-0.37001	0.177211	-2.08796	0.036801	0.248524
ENSG00000131669	NINJ1	829.794	0.23315	0.111677	2.08771	0.0368242	0.248554
ENSG00000150990	DHX37	1423.54	-0.22311	0.106894	-2.08722	0.0368684	0.248726
ENSG00000133246	PRAM1	3078.99	-0.29458	0.141189	-2.08642	0.0369405	0.249086
ENSG00000274180	NATD1	105.428	0.407755	0.195522	2.08547	0.0370266	0.249413
ENSG00000279453	RP3-425C14.4	48.0057	0.592932	0.284313	2.08549	0.0370245	0.249413
ENSG00000182325	FBXL6	593.881	-0.258375	0.123939	-2.08469	0.0370976	0.249764
ENSG00000268001	CARD8-AS1	264.197	0.315194	0.151221	2.08433	0.0371301	0.249856
ENSG00000124198	ARFGEF2	623.258	-0.307837	0.14781	-2.08266	0.0372825	0.250754
ENSG00000166228	PCBD1	702.218	0.243675	0.117026	2.08224	0.0373206	0.250883
ENSG00000134086	VHL	1962.06	-0.245147	0.117748	-2.08196	0.0373462	0.250929
ENSG00000184678	HIST2H2BE	173.299	-0.426725	0.205037	-2.08121	0.0374143	0.251181
ENSG00000130881	LRP3	697.38	-0.259381	0.124634	-2.08113	0.0374217	0.251181
ENSG00000176533	GNG7	369.497	0.270187	0.129877	2.08033	0.0374957	0.251551
ENSG00000131389	SLC6A6	1567.04	0.272925	0.131231	2.07974	0.0375495	0.251785
ENSG00000117242	PINK1-AS	198.845	-0.355106	0.17078	-2.07931	0.0375886	0.25192
ENSG00000165702	GFI1B	1005.74	-0.236894	0.11399	-2.07819	0.0376918	0.251957
ENSG00000117009	KMO	28.2232	0.751115	0.361458	2.07801	0.0377081	0.251957
ENSG00000089022	MAPKAPK5	925.497	-0.245816	0.118239	-2.07898	0.0376194	0.251957
ENSG00000163939	PBRM1	1761.19	-0.253597	0.122008	-2.07853	0.0376604	0.251957
ENSG00000122862	SRGN	16131.2	0.239618	0.115291	2.07838	0.0376745	0.251957
ENSG00000168769	TET2	263.545	0.306151	0.147293	2.07851	0.0376621	0.251957
ENSG00000029993	HMGB3	2796.19	-0.214829	0.103411	-2.07743	0.0377623	0.252002
ENSG00000172172	MRPL13	1090.43	-0.232979	0.112149	-2.07741	0.0377638	0.252002
ENSG00000125630	POLR1B	817.179	-0.288333	0.1388	-2.07732	0.0377718	0.252002
ENSG00000196878	LAMB3	345.46	0.345777	0.166545	2.07618	0.037877	0.252323
ENSG00000160949	TONSL	1172.65	-0.238466	0.114855	-2.07623	0.0378723	0.252323
ENSG00000256060	TRAPPC2B	91.9508	0.451461	0.217438	2.07627	0.0378688	0.252323
ENSG00000154832	CXXC1	2338.78	-0.234247	0.112877	-2.07525	0.0379638	0.252775
ENSG00000105185	PDCD5	1495.7	-0.223682	0.107813	-2.07472	0.0380123	0.252971
ENSG00000100726	TELO2	1686.99	-0.292789	0.141245	-2.07292	0.0381801	0.25396
ENSG00000164331	ANKRA2	244.219	0.312233	0.150738	2.07136	0.0383253	0.254268
ENSG00000221963	APOL6	384.506	0.277518	0.133938	2.072	0.0382657	0.254268
ENSG00000188822	CNR2	35.4924	0.648273	0.312967	2.07138	0.0383235	0.254268
[truncated: 13,019 more rows]

## Sheet: fGSEA
Supplemental Table S9b: fGSEA of Elavl1 knock down primary AML transcriptome
genesetID	geneset_description	p	FDR	NES	phenotype	leadingEdge
DEFENSE RESPONSE%GOBP%GO:0006952	DEFENSE RESPONSE%GOBP%GO:0006952	3.10005e-10	3.25175e-07	1.80807	1	MT2A,PTGER4,CCR7,NCF1,IFIT2,HLA-DQB1,SLA,HLA-DQA1,ANXA1,ADAM17,HLA-DRA,HLA-DPA1,SERINC5,BCL10,IFNAR2,CHI3L1,TRIM38,HP,BNIP3L,C3,CCL3L3,CCRL2,IL1RN,CMKLR1,PSEN1,CD74,VEZF1,ICAM1,HLA-DRB1,PTX3,HMOX1,HLA-DRB5,CX3CR1,SIRPB1,TRIM4,RELB,PARP4,ADGRE5,CST3,CD40,FCGR2B,CCL24,IFIT3,OPTN,CCR2,FADD,CCL1,TIFA,SIGLEC15,TIRAP,IFNGR2,TRIM21,TRIM62,IL18,MX1,CCR1,CTNNBIP1,CCL3,TNFSF4,MX2,SRC,IL6R,GBP2,CCL23,CD48,N…
NCRNA PROCESSING%GOBP%GO:0034470	NCRNA PROCESSING%GOBP%GO:0034470	2.02619e-10	3.25175e-07	-2.10287	-1	RRP15,MDN1,THUMPD1,NAT10,EXOSC8,WDR12,PDCD11,RRP9,DDX10,FAM98B,CTU2,TRIT1,MRM1,DUS2,TOE1,NOC4L,NOLC1,UTP3,NOP9,RRP7BP,INTS10,ADAR,URB1,RRP12,BOP1,MRTO4,GAR1,AARS2,RPUSD3,WDR74,RRP7A,WDR46,UTP14A,CPSF1,TRMT61A,PUS1,TRMT1,POP5,MRPL1,INTS3,METTL1,NOL6,RPL7L1,TSR1,NOP56,TARBP1,NOP58,RPP25,EXOSC5,PES1,DHX37,WDR36,MAK16,NSUN6,ANKRD16,RCL1,SENP3,EXOSC2,MPHOSPH10,NSUN5P1,TRMU,QTRT1,FTSJ1,UTP20,RPP25L,IMP…
RIBONUCLEOPROTEIN COMPLEX BIOGENESIS%GOBP%GO:0022613	RIBONUCLEOPROTEIN COMPLEX BIOGENESIS%GOBP%GO:0022613	3.74031e-10	3.25175e-07	-1.99778	-1	RRP15,MDN1,THUMPD1,NAT10,EXOSC8,WDR12,PDCD11,RRP9,DDX10,MRM1,OGFOD1,NOC4L,NOLC1,EIF2S3,UTP3,NOP9,RRP7BP,ADAR,URB1,HEATR3,RRP12,BOP1,MRTO4,GAR1,RPUSD3,WDR74,RRP7A,WDR46,UTP14A,POP5,PAK1IP1,RUVBL1,MRPL1,URB2,NLE1,NOL6,RPL7L1,SNRPD3,TSR1,NOP56,SRSF1,NOP58,EXOSC5,PPAN,XPO1,PES1,DHX37,WDR36,NOP16,MAK16,PRPF31,PRMT7,RCL1,SENP3,CLNS1A,EXOSC2,MPHOSPH10,EIF2S1,NSUN5P1,UTP20,IMP4,LYAR,SURF6,RRP1B,GTF3A,EIF…
RIBOSOME BIOGENESIS%GOBP%GO:0042254	RIBOSOME BIOGENESIS%GOBP%GO:0042254	3.74266e-10	3.25175e-07	-2.151	-1	RRP15,MDN1,THUMPD1,NAT10,EXOSC8,WDR12,PDCD11,RRP9,DDX10,MRM1,NOC4L,NOLC1,UTP3,NOP9,RRP7BP,URB1,HEATR3,RRP12,BOP1,MRTO4,GAR1,RPUSD3,WDR74,RRP7A,WDR46,UTP14A,POP5,PAK1IP1,MRPL1,URB2,NLE1,NOL6,RPL7L1,TSR1,NOP56,NOP58,EXOSC5,PPAN,XPO1,PES1,DHX37,WDR36,NOP16,MAK16,RCL1,SENP3,EXOSC2,MPHOSPH10,NSUN5P1,UTP20,IMP4,LYAR,SURF6,RRP1B,GTF3A,NOC2L,RRS1,NOL10,EMG1,RPUSD1,WDR43,EBNA1BP2,KRI1,NIFK,PIH1D1,TEX10,TS…
RRNA METABOLIC PROCESS%GOBP%GO:0016072	RRNA METABOLIC PROCESS%GOBP%GO:0016072	1.67595e-10	3.25175e-07	-2.20647	-1	RRP15,MDN1,THUMPD1,NAT10,EXOSC8,WDR12,PDCD11,RRP9,DDX10,MRM1,NOC4L,NOLC1,UTP3,NOP9,RRP7BP,URB1,RRP12,BOP1,MRTO4,GAR1,RPUSD3,WDR74,RRP7A,WDR46,UTP14A,POP5,MRPL1,NOL6,RPL7L1,TSR1,NOP56,NOP58,EXOSC5,TCOF1,PES1,DHX37,WDR36,MAK16,GTF3C1,RCL1,SENP3,EXOSC2,MPHOSPH10,NSUN5P1,UTP20,IMP4,LYAR,RRP1B,GTF3A,DIS3L,RRS1,NOL10,EMG1,RPUSD1,WDR43,EBNA1BP2,KRI1,NIFK,PIH1D1,TEX10,POLR1E,TSR3,TBL3,NAF1,NSUN5P2,LAS1L,…
RRNA PROCESSING%GOBP%GO:0006364	RRNA PROCESSING%GOBP%GO:0006364	1.06855e-10	3.25175e-07	-2.2527	-1	RRP15,MDN1,THUMPD1,NAT10,EXOSC8,WDR12,PDCD11,RRP9,DDX10,MRM1,NOC4L,NOLC1,UTP3,NOP9,RRP7BP,URB1,RRP12,BOP1,MRTO4,GAR1,RPUSD3,WDR74,RRP7A,WDR46,UTP14A,POP5,MRPL1,NOL6,RPL7L1,TSR1,NOP56,NOP58,EXOSC5,PES1,DHX37,WDR36,MAK16,RCL1,SENP3,EXOSC2,MPHOSPH10,NSUN5P1,UTP20,IMP4,LYAR,RRP1B,RRS1,NOL10,EMG1,RPUSD1,WDR43,EBNA1BP2,KRI1,NIFK,PIH1D1,TEX10,TSR3,TBL3,NAF1,NSUN5P2,LAS1L,DDX54,NOL8,METTL15,EXOSC7,WDR18,…
NCRNA METABOLIC PROCESS%GOBP%GO:0034660	NCRNA METABOLIC PROCESS%GOBP%GO:0034660	6.47326e-10	4.82073e-07	-1.9561	-1	RRP15,MDN1,THUMPD1,NAT10,EXOSC8,WDR12,PDCD11,RRP9,DDX10,FAM98B,PHAX,EEF1E1,CTU2,TRIT1,MRM1,DUS2,TOE1,LARS2,NOC4L,NOLC1,UTP3,NOP9,RRP7BP,INTS10,XPO5,ADAR,URB1,RRP12,BOP1,MRTO4,GAR1,PLD6,AARS2,RPUSD3,WDR74,RRP7A,WDR46,UTP14A,CPSF1,TRMT61A,PUS1,TRMT1,FARSA,POP5,MRPL1,INTS3,METTL1,NOL6,RPL7L1,SNAPC4,TSR1,NOP56,TARBP1,NOP58,RPP25,EXOSC5,TCOF1,POLR2K,PPA2,PES1,DHX37,WDR36,MAK16,NSUN6,GTF3C1,NARS2,ANKRD…
INTERFERON GAMMA SIGNALING%REACTOME%R-HSA-877300.3	INTERFERON GAMMA SIGNALING%REACTOME%R-HSA-877300.3	3.34441e-09	2.1793e-06	2.21185	1	MT2A,HLA-DQB1,HLA-DQA1,HLA-DRA,SOCS3,HLA-DPA1,TRIM38,ICAM1,HLA-DRB1,HLA-DRB5,IFNGR2,TRIM21,TRIM62,SOCS1,GBP2,PIAS1,IRF7,CAMK2A,IRF1,CAMK2G,GBP5,B2M,OAS2,HLA-DPB1,GBP4,TRIM22,GBP1,IRF4,TRIM35
CELLULAR RESPONSE TO INTERFERON-GAMMA%GOBP%GO:0071346	CELLULAR RESPONSE TO INTERFERON-GAMMA%GOBP%GO:0071346	1.37703e-08	7.97609e-06	2.20308	1	MT2A,HLA-DQB1,HLA-DQA1,HLA-DRA,HLA-DPA1,TRIM38,CCL3L3,ICAM1,HLA-DRB1,HLA-DRB5,CCL24,CCL1,IFNGR2,TRIM21,TRIM62,CCL3,GBP2,CCL23,IRF7,CAMK2A,IRF1,CAMK2G,TLR4,GBP5,B2M,OAS2,HLA-DPB1,GBP4,TRIM22
REGULATION OF RESPONSE TO EXTERNAL STIMULUS%GOBP%GO:0032101	REGULATION OF RESPONSE TO EXTERNAL STIMULUS%GOBP%GO:0032101	1.77409e-08	9.24834e-06	1.75438	1	PTGER4,CCR7,MICB,LDLR,CDKN1A,VAMP3,ANXA1,DUSP10,ADAM17,TNFAIP3,MVK,CRK,STX3,A2M,MN1,THBD,SEMA3C,NFKBIA,TFPI,C3,MOSPD2,CMKLR1,CD74,GPR183,MAPK7,PLAUR,HLA-DRB1,ZCCHC3,SEMA4B,XIAP,TICAM1,RIN3,SEC14L1,CD109,FCGR2B,RIPK1,CALM1,PDCD4,OPTN,CCR2,CCL1,TIRAP,SPATA2,IL18,CCR1,CCL3,ABCD1,TNFSF4,DAPK2,CAMK1D,BIRC3,IL6R,MAPK1,FGFR1,TRIB1,INPP5F,RAC1,AREL1,CLEC7A,F11R,LILRA2,TNFRSF1B,TLR6,NLRP1,PTGS2,BBS4,DDX58…
HALLMARK_INTERFERON_GAMMA_RESPONSE%MSIGDB_C2%HALLMARK_INTERFERON_GAMMA_RESPONSE	HALLMARK_INTERFERON_GAMMA_RESPONSE%MSIGDB_C2%HALLMARK_INTERFERON_GAMMA_RESPONSE	2.71054e-08	1.28455e-05	2.02773	1	MT2A,IFIT2,CDKN1A,HLA-DQA1,TNFAIP3,SOCS3,TXNIP,IFNAR2,HELZ2,NFKBIA,IL10RA,CMKLR1,CD74,HLA-DRB1,HLA-DMA,CD40,TNFSF10,RIPK1,TNFAIP2,ST3GAL5,IFIT3,ARID5B,TRIM21,MX1,MX2,SOCS1,CD69,IRF7,LGALS3BP,IRF1,CSF2RB,RTP4,PTGS2,DDX58,ITGB7,MTHFD2,B2M,OAS2,TRAFD1,GBP4,TAPBP,SPPL2A,FPR1,SERPING1,FGL2,IFIH1
CYTOKINE-MEDIATED SIGNALING PATHWAY%GOBP%GO:0019221	CYTOKINE-MEDIATED SIGNALING PATHWAY%GOBP%GO:0019221	3.32332e-08	1.44371e-05	1.73352	1	MT2A,TNFSF9,ANXA2,IFIT2,HLA-DQB1,CRLF2,CDKN1A,HLA-DQA1,ANXA1,ADAM17,HLA-DRA,IRAK2,TNFSF14,SOCS3,HLA-DPA1,VIM,CD86,IFNAR2,CRK,TRIM38,STX3,SQSTM1,NFKBIA,CCL3L3,CDC42,IL1RN,IL10RA,TRAF6,ICAM1,CSF2RA,HLA-DRB1,TOLLIP,HMOX1,CD4,HLA-DRB5,SMAD4,TAB2,CD40,CISH,RIPK1,PDCD4,MYC,CCL24,IFIT3,CCR2,UGCG,BAG4,BTRC,CCL1,IFNGR2,CBL,TRIM21,TRIM62,IL18,MX1,CCR1,CCL3,TNFSF4,MAP3K3,MX2,BIRC3,SOCS1,SRC,JUNB,IL6R,GBP2,C…
INNATE IMMUNE RESPONSE%GOBP%GO:0045087	INNATE IMMUNE RESPONSE%GOBP%GO:0045087	4.4033e-08	1.76572e-05	1.86819	1	MT2A,NCF1,IFIT2,HLA-DQB1,SLA,HLA-DQA1,HLA-DRA,HLA-DPA1,SERINC5,BCL10,IFNAR2,TRIM38,C3,CCL3L3,CD74,ICAM1,HLA-DRB1,PTX3,HLA-DRB5,CX3CR1,SIRPB1,TRIM4,RELB,CD40,CCL24,IFIT3,CCL1,TIFA,SIGLEC15,IFNGR2,TRIM21,TRIM62,MX1,CCL3,MX2,SRC,GBP2,CCL23,NCF2,TYROBP,IRF7,IP6K2,RNASEL,TREM1,CAMK2A,SMPD1,CAPZA1,IRF1,KYNU,CAMK2G,DDX58,TLR4,GBP5,OTULIN,B2M,OAS2,HLA-DPB1,CEBPG,CALCOCO2,CRISP3,SFTPD,MFAP4,SERINC3,S100B,…
HALLMARK_INFLAMMATORY_RESPONSE%MSIGDB_C2%HALLMARK_INFLAMMATORY_RESPONSE	HALLMARK_INFLAMMATORY_RESPONSE%MSIGDB_C2%HALLMARK_INFLAMMATORY_RESPONSE	7.63419e-08	2.84264e-05	2.08865	1	BTG2,PTGER4,CCR7,LDLR,CDKN1A,IRAK2,ABCA1,NFKBIA,CCRL2,IL10RA,CMKLR1,PSEN1,SLC31A2,PLAUR,RGS1,CD40,TNFSF10,MYC,CCL24,IFNGR2,PTPRE,IL18,SLAMF1,AXL,CD48,CD69,IRF7,CALCRL,TNFRSF1B,IRF1,RTP4,NLRP3,IL7R,TAPBP,GNAI3,CD55,FPR1,EMP3,P2RX4,SLC11A2
INTERFERON-GAMMA-MEDIATED SIGNALING PATHWAY%GOBP%GO:0060333	INTERFERON-GAMMA-MEDIATED SIGNALING PATHWAY%GOBP%GO:0060333	1.96234e-07	6.81979e-05	2.13687	1	MT2A,HLA-DQB1,HLA-DQA1,HLA-DRA,HLA-DPA1,TRIM38,ICAM1,HLA-DRB1,HLA-DRB5,IFNGR2,TRIM21,TRIM62,GBP2,IRF7,CAMK2A,IRF1,CAMK2G,B2M,OAS2,HLA-DPB1
REGULATION OF MAPK CASCADE%GOBP%GO:0043408	REGULATION OF MAPK CASCADE%GOBP%GO:0043408	3.56132e-07	0.000116032	1.69026	1	CCR7,NCF1,DUSP10,SDCBP,IRAK2,FLCN,SORL1,CRK,CHI3L1,S1PR2,CCL3L3,RRAS,LPAR1,RNF41,CD74,GPR183,RGS2,TRAF6,ICAM1,AVPI1,HLA-DRB1,CD4,SMAD4,ARHGEF5,RGS14,TAB2,CDK1,CD40,TRIB2,FCGR2B,RIPK1,PDCD4,MYC,CCL24,CAV2,ADRB2,INSR,CCL1,SPRY1,TIRAP,AIDA,CCR1,ADAM9,CCL3,SLAMF1,PHLPP1,MAPK1,SPRY3,LBH,FGFR1,CCL23,IGBP1,TRIB1,BCAR3,PRDM11,IQGAP1,MAP2K3,ZNF622,ATP6AP2,PDCD10,SMPD1,TIMP3,DUSP5,TLR6,FAM83D,RELL1,CRKL,TA…
POSITIVE REGULATION OF LEUKOCYTE DIFFERENTIATION%GOBP%GO:1902107	POSITIVE REGULATION OF LEUKOCYTE DIFFERENTIATION%GOBP%GO:1902107	4.36298e-07	0.000126357	2.0673	1	TNFSF9,ANXA1,DUSP10,HLA-DRA,MYB,CD86,TGFBR2,CD74,TRAF6,HLA-DRB1,CD4,ZBTB1,RIPK1,FADD,EVI2B,IL18,CCR1,CTNNBIP1,TNFSF4,SOCS1,AXL,TYROBP
REGULATION OF LEUKOCYTE MIGRATION%GOBP%GO:0002685	REGULATION OF LEUKOCYTE MIGRATION%GOBP%GO:0002685	4.20611e-07	0.000126357	2.04256	1	PTGER4,CCR7,ANXA1,ADAM17,MOSPD2,CMKLR1,CD74,ICAM1,HMOX1,CX3CR1,TMEM102,RIN3,CD99,CCR2,FADD,CCL1,TIRAP,CCR1,CCL3,DAPK2,CAMK1D,IL6R,MAPK1,RAC1
POSITIVE REGULATION OF CELL ADHESION%GOBP%GO:0045785	POSITIVE REGULATION OF CELL ADHESION%GOBP%GO:0045785	6.45815e-07	0.000172061	1.85301	1	TNFSF9,CCR7,DENND6A,ANXA1,DUSP10,HLA-DRA,FLCN,TNFSF14,HLA-DPA1,MYB,S100A10,CD86,CRK,STX3,PLEKHA2,TGFBR2,RRAS,CDC42,TRAF6,AGR2,PLAUR,HLA-DRB1,SIRPB1,TMEM102,ZBTB1,ZFHX3,NCK1,CCR2,FADD,TSC1,IL18,ADAM9,ADAM19,TNFSF4,CITED2,SOCS1,SRC,RAC1,PDPK1,TFRC,F11R,HLA-DMB,CRKL,HLA-DPB1,DMTN,NLRP3,EPHA1,FOXA2,ARHGEF7,SOCS5,CD6,MAP3K8,CAV1,CD55,UTRN
RESPONSE TO INTERFERON-GAMMA%GOBP%GO:0034341	RESPONSE TO INTERFERON-GAMMA%GOBP%GO:0034341	6.60122e-07	0.000172061	2.05653	1	MT2A,HLA-DQB1,HLA-DQA1,HLA-DRA,HLA-DPA1,TRIM38,CCL3L3,CD74,ICAM1,HLA-DRB1,HLA-DRB5,CD40,CCL24,CCL1,IFNGR2,TRIM21,TRIM62,CCL3,GBP2,CCL23,IRF7,CAMK2A,IRF1,KYNU,CAMK2G,TLR4,GBP5,B2M,OAS2,HLA-DPB1,CALCOCO2,GBP4,TRIM22
CELL ACTIVATION INVOLVED IN IMMUNE RESPONSE%GOBP%GO:0002263	CELL ACTIVATION INVOLVED IN IMMUNE RESPONSE%GOBP%GO:0002263	1.30183e-06	0.000308475	1.62364	1	PTGER4,IDH1,ANXA2,SDCBP,NPC2,DYNLT1,PLEKHO2,CHI3L1,BRI3,S100A11,HP,METTL7A,C3,ARL8A,MOSPD2,PSEN1,CD74,GPR183,ICAM1,PLAUR,RAB18,PTX3,TOLLIP,ASAH1,CD53,SIRPB1,YPEL5,FCGR2A,TOM1,ADGRE5,PECAM1,CST3,AMPD3,LAMP2,PSAP,LFNG,FCGR2B,GM2A,MILR1,TIMP2,FTH1,IST1,FTL,SLC2A3,ATP6V1D,CCL3,SLAMF1,CTSA,HSPA1B,GLIPR1,HBB,MAPK1,CPPED1,KCMF1,CYB5R3,TYROBP,RAP1B,RAC1,IQGAP1,VCL,GBF1,ARSB,HEXB,CSTB,HVCN1,ATP6AP2,SLC44A…
LEUKOCYTE ACTIVATION INVOLVED IN IMMUNE RESPONSE%GOBP%GO:0002366	LEUKOCYTE ACTIVATION INVOLVED IN IMMUNE RESPONSE%GOBP%GO:0002366	1.27429e-06	0.000308475	1.617	1	PTGER4,IDH1,ANXA2,SDCBP,NPC2,DYNLT1,PLEKHO2,CHI3L1,BRI3,S100A11,HP,METTL7A,C3,ARL8A,MOSPD2,PSEN1,CD74,GPR183,ICAM1,PLAUR,RAB18,PTX3,TOLLIP,ASAH1,CD53,SIRPB1,YPEL5,FCGR2A,TOM1,ADGRE5,PECAM1,CST3,AMPD3,LAMP2,PSAP,LFNG,FCGR2B,GM2A,MILR1,TIMP2,FTH1,IST1,FTL,SLC2A3,ATP6V1D,CCL3,SLAMF1,CTSA,HSPA1B,GLIPR1,HBB,MAPK1,CPPED1,KCMF1,CYB5R3,TYROBP,RAP1B,RAC1,IQGAP1,VCL,ARSB,HEXB,CSTB,HVCN1,ATP6AP2,SLC44A2,LIL…
CHEMOKINE RECEPTORS BIND CHEMOKINES%REACTOME DATABASE ID RELEASE 75%380108	CHEMOKINE RECEPTORS BIND CHEMOKINES%REACTOME DATABASE ID RELEASE 75%380108	1.7407e-06	0.000394533	2.12105	1	CCR7,CXCR3,CCL3L3,CCRL2,CX3CR1,CCR2,CCL1,CCR1,CCL3
POSITIVE REGULATION OF TUMOR NECROSIS FACTOR SUPERFAMILY CYTOKINE PRODUCTION%GOBP%GO:1903557	POSITIVE REGULATION OF TUMOR NECROSIS FACTOR SUPERFAMILY CYTOKINE PRODUCTION%GOBP%GO:1903557	1.94766e-06	0.000423049	2.05469	1	CD86,BCL10,HAVCR2,PSEN1,RIPK1,CCR2,FADD,TIRAP,CCL3,TYROBP,CLEC7A,LILRA2,DDX58,TLR4,THBS1,FRMD8,CD2,IFIH1
POSITIVE REGULATION OF LEUKOCYTE MIGRATION%GOBP%GO:0002687	POSITIVE REGULATION OF LEUKOCYTE MIGRATION%GOBP%GO:0002687	2.26522e-06	0.000469773	2.02173	1	CCR7,ADAM17,MOSPD2,CMKLR1,CD74,ICAM1,TMEM102,CD99,CCR2,FADD,CCL1,TIRAP,CCR1,CCL3,DAPK2,CAMK1D,IL6R,MAPK1,RAC1
REGULATION OF CELL ADHESION%GOBP%GO:0030155	REGULATION OF CELL ADHESION%GOBP%GO:0030155	2.34301e-06	0.000469773	1.63168	1	TNFSF9,CCR7,CXCR3,DENND6A,ANXA1,DUSP10,HLA-DRA,FLCN,TNFSF14,HLA-DPA1,MYB,S100A10,CD86,HAVCR2,CRK,STX3,PLEKHA2,TGFBR2,RRAS,CDC42,IL1RN,MAPK7,TRAF6,AGR2,PLAUR,HLA-DRB1,PLXNC1,SIRPB1,SDC4,TMEM102,ADA,ZBTB1,FCGR2B,LPXN,ZFHX3,NCK1,CCR2,FADD,TSC1,IL18,ADAM9,ADAM19,TNFSF4,CITED2,SOCS1,SRC,DLG5,CD164,RDX,RAC1,PDPK1,VCL,TFRC,CYP1B1,F11R,MDGA1,IRF1,HLA-DMB,CRKL,HLA-DPB1,THBS1,PDE3B,DMTN,SFTPD,NLRP3,EPHA1,F…
HALLMARK_MYC_TARGETS_V1%MSIGDB_C2%HALLMARK_MYC_TARGETS_V1	HALLMARK_MYC_TARGETS_V1%MSIGDB_C2%HALLMARK_MYC_TARGETS_V1	3.50831e-06	0.000630771	-2.04269	-1	CTPS1,STARD7,SRSF7,RRP9,SRM,MCM6,XPOT,TCP1,NOLC1,EIF4A1,USP1,ERH,CCT4,TRA2B,PA2G4,DUT,SNRPD3,NOP56,NOP16,PRPF31,VDAC3,CLNS1A,CAD,EIF2S1,TRIM28,GNL3,MCM5,IFRD1,CCT7,APEX1,DDX21,HDAC2,RUVBL2,NCBP1,U2AF1,CDK2,CYC1,PSMC4,HSPD1,RPL14,C1QBP,ABCE1,RAN,PSMA2,PSMD3,SRPK1,LSM2,TOMM70,SNRPA1
LEUKOCYTE MEDIATED IMMUNITY%GOBP%GO:0002443	LEUKOCYTE MEDIATED IMMUNITY%GOBP%GO:0002443	3.50899e-06	0.000630771	1.5897	1	IDH1,ANXA2,HLA-DQB1,ADAM17,SDCBP,NPC2,DYNLT1,PLEKHO2,CHI3L1,BRI3,S100A11,HP,METTL7A,C3,ARL8A,MOSPD2,PSEN1,CD74,PLAUR,HLA-DRB1,RAB18,PTX3,TOLLIP,ASAH1,CD53,SIRPB1,YPEL5,FCGR2A,TOM1,ADGRE5,PECAM1,CST3,AMPD3,LAMP2,PSAP,FCGR2B,GM2A,MILR1,TIMP2,FTH1,IST1,FTL,SLC2A3,ATP6V1D,CCL3,CTSA,HSPA1B,GLIPR1,HBB,MAPK1,CPPED1,KCMF1,CYB5R3,TYROBP,RAP1B,RAC1,IQGAP1,VCL,ARSB,HEXB,CSTB,HVCN1,ATP6AP2,SLC44A2,TNFRSF1B,T…
NEGATIVE REGULATION OF RESPONSE TO EXTERNAL STIMULUS%GOBP%GO:0032102	NEGATIVE REGULATION OF RESPONSE TO EXTERNAL STIMULUS%GOBP%GO:0032102	3.41984e-06	0.000630771	1.84724	1	PTGER4,MICB,LDLR,CDKN1A,DUSP10,TNFAIP3,MVK,CRK,THBD,SEMA3C,TFPI,MAPK7,PLAUR,HLA-DRB1,SEMA4B,RIN3,SEC14L1,CD109,FCGR2B,PDCD4,ABCD1,TRIB1,INPP5F,LILRA2,TNFRSF1B,BBS4,KANK2,OTULIN,C5AR2,THBS1,NLRP3,AOAH,GHRL,GRN,PPARD,PLAU
MYELOID LEUKOCYTE MEDIATED IMMUNITY%GOBP%GO:0002444	MYELOID LEUKOCYTE MEDIATED IMMUNITY%GOBP%GO:0002444	4.13628e-06	0.000675323	1.5948	1	IDH1,ANXA2,ADAM17,SDCBP,NPC2,DYNLT1,PLEKHO2,CHI3L1,BRI3,S100A11,HP,METTL7A,C3,ARL8A,MOSPD2,PSEN1,PLAUR,RAB18,PTX3,TOLLIP,ASAH1,CD53,SIRPB1,YPEL5,FCGR2A,TOM1,ADGRE5,PECAM1,CST3,AMPD3,LAMP2,PSAP,GM2A,MILR1,TIMP2,FTH1,IST1,FTL,SLC2A3,ATP6V1D,CCL3,CTSA,HSPA1B,GLIPR1,HBB,MAPK1,CPPED1,KCMF1,CYB5R3,TYROBP,RAP1B,RAC1,IQGAP1,VCL,ARSB,HEXB,CSTB,HVCN1,ATP6AP2,SLC44A2,TNFRSF1B,TMEM179B,CMTM6,RAP2C,ARMC8,MAGT…
POSITIVE REGULATION OF CELL-CELL ADHESION%GOBP%GO:0022409	POSITIVE REGULATION OF CELL-CELL ADHESION%GOBP%GO:0022409	4.13924e-06	0.000675323	1.85932	1	TNFSF9,CCR7,DENND6A,ANXA1,DUSP10,HLA-DRA,TNFSF14,HLA-DPA1,MYB,CD86,TGFBR2,CDC42,TRAF6,PLAUR,HLA-DRB1,SIRPB1,ZBTB1,NCK1,CCR2,FADD,IL18,ADAM19,TNFSF4,CITED2,SOCS1,SRC,RAC1,PDPK1,TFRC,F11R,HLA-DMB,HLA-DPB1,DMTN,NLRP3,FOXA2,SOCS5,CD6,MAP3K8,CAV1,CD55
REGULATION OF DEFENSE RESPONSE%GOBP%GO:0031347	REGULATION OF DEFENSE RESPONSE%GOBP%GO:0031347	4.14547e-06	0.000675323	1.54249	1	PTGER4,CCR7,MICB,LDLR,VAMP3,ANXA1,TNFAIP3,IRAK2,MVK,SOCS3,BCL10,NR1H2,IFNAR2,A2M,NFKBIA,C3,MAPK7,TRAF6,POLR3B,HLA-DRB1,ZCCHC3,PIK3R4,TAB2,RELB,XIAP,TICAM1,CD40,SEC14L1,FCGR2B,RIPK1,PDCD4,OPTN,CCR2,FADD,BTRC,CCL1,TIFA,TIRAP,IFNGR2,TRIM21,SPATA2,IL18,CCL3,ABCD1,TNFSF4,HSPA1B,BIRC3,SOCS1,SRC,PIAS1,TYROBP,IRF7,PDPK1,AREL1,RNASEL,CLEC7A,PSMD5,TANK,LILRA2,TNFRSF1B,IRF1,TLR6,NLRP1,PTGS2,DDX58,TLR4,GBP5,…
REGULATION OF CELL ACTIVATION%GOBP%GO:0050865	REGULATION OF CELL ACTIVATION%GOBP%GO:0050865	4.45315e-06	0.000703463	1.63806	1	TNFSF9,CCR7,LDLR,CRLF2,VAMP3,ANXA1,DUSP10,TNFAIP3,HLA-DRA,TNFSF14,HLA-DPA1,MYB,CD86,HAVCR2,THBD,SAMSN1,TGFBR2,CDC42,CD74,GPR183,HLA-DRB1,CD4,SIRPB1,SDC4,ZBTB1,TICAM1,CD40,FCGR2B,MILR1,NCK1,CCR2,FADD,TIRAP,DCAF15,IL18,CCL3,TNFSF4,CD38,SOCS1,SRC,AXL,DLG5,TYROBP,RAC1,PDPK1,TFRC,CLEC7A,CD84,F11R,LILRA2,TNFRSF1B,IRF1,TLR6,HLA-DMB,TLR4,ZFP36L2,HLA-DPB1,PLA2G4A,THBS1,DMTN,SFTPD,GPR137B,NLRP3,SOCS5,KMT5B…
POSITIVE REGULATION OF LEUKOCYTE CHEMOTAXIS%GOBP%GO:0002690	POSITIVE REGULATION OF LEUKOCYTE CHEMOTAXIS%GOBP%GO:0002690	4.62895e-06	0.000709727	2.04343	1	CCR7,ADAM17,MOSPD2,CMKLR1,CD74,CCR2,CCL1,TIRAP,CCR1,CCL3,DAPK2,CAMK1D,IL6R,MAPK1,RAC1,THBS1
NEUTROPHIL MEDIATED IMMUNITY%GOBP%GO:0002446	NEUTROPHIL MEDIATED IMMUNITY%GOBP%GO:0002446	4.78476e-06	0.000712655	1.57766	1	IDH1,ANXA2,ADAM17,SDCBP,NPC2,DYNLT1,PLEKHO2,CHI3L1,BRI3,S100A11,HP,METTL7A,C3,ARL8A,MOSPD2,PSEN1,PLAUR,RAB18,PTX3,TOLLIP,ASAH1,CD53,SIRPB1,YPEL5,FCGR2A,TOM1,ADGRE5,PECAM1,CST3,AMPD3,LAMP2,PSAP,GM2A,TIMP2,FTH1,IST1,FTL,SLC2A3,ATP6V1D,CTSA,HSPA1B,GLIPR1,HBB,MAPK1,CPPED1,KCMF1,CYB5R3,TYROBP,RAP1B,RAC1,IQGAP1,VCL,ARSB,HEXB,CSTB,HVCN1,ATP6AP2,SLC44A2,TNFRSF1B,TMEM179B,CMTM6,RAP2C,ARMC8,MAGT1,DYNC1H1,C…
INTERFERON SIGNALING%REACTOME%R-HSA-913531.2	INTERFERON SIGNALING%REACTOME%R-HSA-913531.2	5.56135e-06	0.000785287	1.82795	1	MT2A,IFIT2,HLA-DQB1,HLA-DQA1,HLA-DRA,SOCS3,HLA-DPA1,TRIM38,ICAM1,HLA-DRB1,KPNA5,HLA-DRB5,IFIT3,IFNGR2,TRIM21,TRIM62,KPNA2,MX1,MX2,SOCS1,GBP2,PIAS1,IRF7,IP6K2,RNASEL,CAMK2A,IRF1,CAMK2G,DDX58,GBP5,B2M,OAS2,HLA-DPB1
REGULATION OF CELL-CELL ADHESION%GOBP%GO:0022407	REGULATION OF CELL-CELL ADHESION%GOBP%GO:0022407	5.57368e-06	0.000785287	1.75113	1	TNFSF9,CCR7,DENND6A,ANXA1,DUSP10,HLA-DRA,TNFSF14,HLA-DPA1,MYB,CD86,HAVCR2,TGFBR2,CDC42,IL1RN,MAPK7,TRAF6,PLAUR,HLA-DRB1,SIRPB1,SDC4,ADA,ZBTB1,FCGR2B,NCK1,CCR2,FADD,IL18,ADAM19,TNFSF4,CITED2,SOCS1,SRC,DLG5,RDX,RAC1,PDPK1,TFRC,F11R,MDGA1,IRF1,HLA-DMB,HLA-DPB1,DMTN,SFTPD,NLRP3,FOXA2,SOCS5,RC3H2,CD6,MAP3K8,CAV1,CD55,RC3H1
POSITIVE REGULATION OF RESPONSE TO EXTERNAL STIMULUS%GOBP%GO:0032103	POSITIVE REGULATION OF RESPONSE TO EXTERNAL STIMULUS%GOBP%GO:0032103	6.06648e-06	0.000827365	1.83199	1	PTGER4,CCR7,ADAM17,STX3,MN1,THBD,NFKBIA,MOSPD2,CMKLR1,CD74,ZCCHC3,TICAM1,RIPK1,PDCD4,OPTN,CCR2,CCL1,TIRAP,IL18,CCR1,CCL3,TNFSF4,DAPK2,CAMK1D,IL6R,MAPK1,FGFR1,RAC1,CLEC7A,TLR6,PTGS2,TLR4,GBP5,THBS1,TLR7,CD6,GHRL,GRN,TNFRSF11A,P2RX4,NAPEPLD,MCU,IL16,SNX4,IL6ST
RRNA PROCESSING IN THE NUCLEUS AND CYTOSOL%REACTOME DATABASE ID RELEASE 75%8868773	RRNA PROCESSING IN THE NUCLEUS AND CYTOSOL%REACTOME DATABASE ID RELEASE 75%8868773	6.18977e-06	0.000827365	-1.90043	-1	THUMPD1,NAT10,EXOSC8,WDR12,PDCD11,RRP9,NOC4L,UTP3,BOP1,PNO1,GAR1,RRP7A,WDR46,UTP14A,RPL36A,NOL6,TSR1,NOP56,NOP58,RPP25,EXOSC5,PES1,RBM28,DHX37,WDR36,RCL1,SENP3,EXOSC2,MPHOSPH10,NOL12,UTP20,IMP4,NCL,GNL3,EMG1,DDX21,WDR43,EBNA1BP2,TEX10,TSR3,TBL3,LAS1L,RPL26L1,EXOSC7,WDR18,UTP15,DDX49,BMS1,RIOK1,LTV1,RPP40,PWP2,CSNK1E,EXOSC4,RRP1,HEATR1,RPL14,UTP4
POSITIVE REGULATION OF MAPK CASCADE%GOBP%GO:0043410	POSITIVE REGULATION OF MAPK CASCADE%GOBP%GO:0043410	7.09986e-06	0.000925289	1.67789	1	CCR7,NCF1,SDCBP,IRAK2,CRK,CHI3L1,S1PR2,CCL3L3,LPAR1,CD74,GPR183,TRAF6,ICAM1,AVPI1,HLA-DRB1,CD4,ARHGEF5,TAB2,CDK1,CD40,FCGR2B,RIPK1,CCL24,CAV2,ADRB2,INSR,CCL1,TIRAP,CCR1,ADAM9,CCL3,SLAMF1,MAPK1,FGFR1,CCL23,BCAR3,IQGAP1,MAP2K3,ZNF622,PDCD10,DUSP5,TLR6,RELL1,CRKL,TAOK1,TLR4,TGFBR1,ARL6IP5,PELI2,THBS1,MAPK14,SPAG9,GDF15,MAPKAPK2,FGFR3,RAPGEF1,MADD,GHRL,RAP1A,TNFRSF11A,FPR1,MAP3K2,MAP2K7,FLT3
REGULATION OF CYTOKINE PRODUCTION%GOBP%GO:0001817	REGULATION OF CYTOKINE PRODUCTION%GOBP%GO:0001817	7.72887e-06	0.000982698	1.56867	1	PTGER4,CCR7,CRLF2,ANXA1,SMAD3,ADAM17,TNFAIP3,HLA-DPA1,CD86,BCL10,SORL1,HAVCR2,C3,CMKLR1,PSEN1,CD74,TRAF6,POLR3B,HLA-DRB1,CTNNB1,HMOX1,CD4,SMAD4,CX3CR1,ZCCHC3,RELB,EIF2AK3,TICAM1,CD40,TRIB2,SEC14L1,FCGR2B,RIPK1,PDCD4,CCR2,FADD,CCL1,TIRAP,TRIM21,IL18,CCL3,ABCD1,SLAMF1,TNFSF4,HSPA1B,BIRC3,IL6R,AXL,BCL3,TYROBP,IRF7,RAC1,CYP1B1,CLEC7A,CD84,ATP6AP2,SRGN,LILRA2,TNFRSF1B,IRF1,TLR6,NLRP1,PTGS2,DDX58,TLR4,…
LEUKOCYTE DEGRANULATION%GOBP%GO:0043299	LEUKOCYTE DEGRANULATION%GOBP%GO:0043299	8.23949e-06	0.00100791	1.56785	1	IDH1,ANXA2,SDCBP,NPC2,DYNLT1,PLEKHO2,CHI3L1,BRI3,S100A11,HP,METTL7A,C3,ARL8A,MOSPD2,PSEN1,PLAUR,RAB18,PTX3,TOLLIP,ASAH1,CD53,SIRPB1,YPEL5,FCGR2A,TOM1,ADGRE5,PECAM1,CST3,AMPD3,LAMP2,PSAP,GM2A,MILR1,TIMP2,FTH1,IST1,FTL,SLC2A3,ATP6V1D,CCL3,CTSA,HSPA1B,GLIPR1,HBB,MAPK1,CPPED1,KCMF1,CYB5R3,TYROBP,RAP1B,RAC1,IQGAP1,VCL,ARSB,HEXB,CSTB,HVCN1,ATP6AP2,SLC44A2,TNFRSF1B,TMEM179B,CMTM6,RAP2C,ARMC8,MAGT1,DYNC1…
POSITIVE REGULATION OF CYTOKINE PRODUCTION%GOBP%GO:0001819	POSITIVE REGULATION OF CYTOKINE PRODUCTION%GOBP%GO:0001819	8.31389e-06	0.00100791	1.6902	1	PTGER4,CCR7,CRLF2,ANXA1,ADAM17,HLA-DPA1,CD86,BCL10,SORL1,HAVCR2,C3,PSEN1,CD74,TRAF6,POLR3B,CTNNB1,HMOX1,CD4,ZCCHC3,EIF2AK3,TICAM1,CD40,RIPK1,CCR2,FADD,CCL1,TIRAP,IL18,CCL3,TNFSF4,HSPA1B,IL6R,TYROBP,IRF7,CYP1B1,CLEC7A,ATP6AP2,LILRA2,IRF1,TLR6,NLRP1,PTGS2,DDX58,TLR4,GBP5,NFKB2,B2M,HLA-DPB1,CEBPG,THBS1,MAPK14,TLR7,NLRP3,SCAMP5,SULF2,CD6,CD244,FRMD8
CELL MOTILITY%GOBP%GO:0048870	CELL MOTILITY%GOBP%GO:0048870	9.58084e-06	0.00104052	1.53717	1	CCR7,CXCR3,ITGA5,ANXA1,ADAM17,TNFAIP3,SDCBP,PEX13,TNFAIP1,NR4A2,THBD,SEMA3C,CCL3L3,CCRL2,CDC42,LPAR1,MT-RNR2,LRP12,CD74,SCYL3,GPR183,GCNT1,ICAM1,CTTN,CX3CR1,SDC4,SEMA4B,ELMO2,CDK1,PECAM1,CD99,CCL24,ZRANB1,RHOQ,LPXN,LGALS12,CCR2,SLC16A3,CCL1,GAB1,PAK4,CCR1,ADAM9,CCL3,NR4A1,RFX3,SRC,IL6R,AXL,FGFR1,CCL23,TNFRSF10B,CD48,PIK3C2A,RAC1,PDPK1,IQGAP1,GBF1,SGPL1,ARSB,CYP1B1,CD84,TREM1,F11R,MDGA1,PDCD10,LAM…
LOCALIZATION OF CELL%GOBP%GO:0051674	LOCALIZATION OF CELL%GOBP%GO:0051674	9.58084e-06	0.00104052	1.53717	1	CCR7,CXCR3,ITGA5,ANXA1,ADAM17,TNFAIP3,SDCBP,PEX13,TNFAIP1,NR4A2,THBD,SEMA3C,CCL3L3,CCRL2,CDC42,LPAR1,MT-RNR2,LRP12,CD74,SCYL3,GPR183,GCNT1,ICAM1,CTTN,CX3CR1,SDC4,SEMA4B,ELMO2,CDK1,PECAM1,CD99,CCL24,ZRANB1,RHOQ,LPXN,LGALS12,CCR2,SLC16A3,CCL1,GAB1,PAK4,CCR1,ADAM9,CCL3,NR4A1,RFX3,SRC,IL6R,AXL,FGFR1,CCL23,TNFRSF10B,CD48,PIK3C2A,RAC1,PDPK1,IQGAP1,GBF1,SGPL1,ARSB,CYP1B1,CD84,TREM1,F11R,MDGA1,PDCD10,LAM…
MYELOID CELL ACTIVATION INVOLVED IN IMMUNE RESPONSE%GOBP%GO:0002275	MYELOID CELL ACTIVATION INVOLVED IN IMMUNE RESPONSE%GOBP%GO:0002275	9.28106e-06	0.00104052	1.57154	1	IDH1,ANXA2,SDCBP,NPC2,DYNLT1,PLEKHO2,CHI3L1,BRI3,S100A11,HP,METTL7A,C3,ARL8A,MOSPD2,PSEN1,PLAUR,RAB18,PTX3,TOLLIP,ASAH1,CD53,SIRPB1,YPEL5,FCGR2A,TOM1,ADGRE5,PECAM1,CST3,AMPD3,LAMP2,PSAP,GM2A,MILR1,TIMP2,FTH1,IST1,FTL,SLC2A3,ATP6V1D,CCL3,SLAMF1,CTSA,HSPA1B,GLIPR1,HBB,MAPK1,CPPED1,KCMF1,CYB5R3,TYROBP,RAP1B,RAC1,IQGAP1,VCL,ARSB,HEXB,CSTB,HVCN1,ATP6AP2,SLC44A2,LILRA2,TNFRSF1B,TMEM179B,CMTM6,RAP2C,ARM…
NEUTROPHIL DEGRANULATION%REACTOME%R-HSA-6798695.2	NEUTROPHIL DEGRANULATION%REACTOME%R-HSA-6798695.2	9.35873e-06	0.00104052	1.57494	1	IDH1,ANXA2,SDCBP,NPC2,DYNLT1,PLEKHO2,CHI3L1,BRI3,S100A11,HP,METTL7A,C3,ARL8A,MOSPD2,PSEN1,PLAUR,RAB18,PTX3,TOLLIP,ASAH1,CD53,SIRPB1,YPEL5,FCGR2A,TOM1,ADGRE5,PECAM1,CST3,AMPD3,LAMP2,PSAP,GM2A,TIMP2,FTH1,IST1,FTL,SLC2A3,ATP6V1D,CTSA,HSPA1B,GLIPR1,HBB,MAPK1,CPPED1,KCMF1,CYB5R3,TYROBP,RAP1B,RAC1,IQGAP1,VCL,ARSB,HEXB,CSTB,HVCN1,ATP6AP2,SLC44A2,TNFRSF1B,TMEM179B,CMTM6,RAP2C,ARMC8,MAGT1,DYNC1H1,COPB1,B2…
REGULATION OF LEUKOCYTE ACTIVATION%GOBP%GO:0002694	REGULATION OF LEUKOCYTE ACTIVATION%GOBP%GO:0002694	9.57877e-06	0.00104052	1.64673	1	TNFSF9,CCR7,LDLR,CRLF2,VAMP3,ANXA1,DUSP10,TNFAIP3,HLA-DRA,TNFSF14,HLA-DPA1,MYB,CD86,HAVCR2,SAMSN1,TGFBR2,CDC42,CD74,GPR183,HLA-DRB1,CD4,SIRPB1,SDC4,ZBTB1,TICAM1,CD40,FCGR2B,MILR1,NCK1,CCR2,FADD,TIRAP,DCAF15,IL18,CCL3,TNFSF4,CD38,SOCS1,SRC,AXL,DLG5,TYROBP,RAC1,PDPK1,TFRC,CLEC7A,CD84,TNFRSF1B,IRF1,TLR6,HLA-DMB,TLR4,ZFP36L2,HLA-DPB1,THBS1,SFTPD,GPR137B,NLRP3,SOCS5,KMT5B,RC3H2,CD6,MAP3K8,GRN,CAV1,CD5…
REGULATION OF TUMOR NECROSIS FACTOR SUPERFAMILY CYTOKINE PRODUCTION%GOBP%GO:1903555	REGULATION OF TUMOR NECROSIS FACTOR SUPERFAMILY CYTOKINE PRODUCTION%GOBP%GO:1903555	9.88932e-06	0.0010521	1.92676	1	TNFAIP3,CD86,BCL10,HAVCR2,PSEN1,CX3CR1,RIPK1,CCR2,FADD,TIRAP,CCL3,SLAMF1,TYROBP,CLEC7A,LILRA2,DDX58,TLR4,C5AR2,THBS1,MAPKAPK2,FRMD8,GHRL,CD2,IFIH1
INFLAMMATORY RESPONSE%GOBP%GO:0006954	INFLAMMATORY RESPONSE%GOBP%GO:0006954	1.02532e-05	0.001069	1.79693	1	PTGER4,CCR7,ANXA1,CHI3L1,HP,CCL3L3,CCRL2,IL1RN,CMKLR1,PSEN1,HLA-DRB1,PTX3,HMOX1,RELB,PARP4,ADGRE5,CD40,FCGR2B,CCL24,CCR2,CCL1,IL18,CCR1,CTNNBIP1,CCL3,TNFSF4,IL6R,CCL23,TYROBP,RAC1,F11R,TLR6,TLR4,C5AR2,THBS1,ADORA3,MAPKAPK2,SCUBE1,NLRP3,HMGB2,CD6,GRN,FPR1
GENERATION OF SECOND MESSENGER MOLECULES%REACTOME DATABASE ID RELEASE 75%202433	GENERATION OF SECOND MESSENGER MOLECULES%REACTOME DATABASE ID RELEASE 75%202433	1.10724e-05	0.00113177	2.07045	1	HLA-DQB1,HLA-DQA1,HLA-DRA,HLA-DPA1,HLA-DRB1,CD4,HLA-DRB5,CD101,NCK1,HLA-DPB1
NEUTROPHIL ACTIVATION%GOBP%GO:0042119	NEUTROPHIL ACTIVATION%GOBP%GO:0042119	1.23323e-05	0.00123631	1.55502	1	IDH1,ANXA2,SDCBP,NPC2,DYNLT1,PLEKHO2,CHI3L1,BRI3,S100A11,HP,METTL7A,C3,ARL8A,MOSPD2,PSEN1,PLAUR,RAB18,PTX3,TOLLIP,ASAH1,CD53,SIRPB1,YPEL5,FCGR2A,TOM1,ADGRE5,PECAM1,CST3,AMPD3,LAMP2,PSAP,GM2A,TIMP2,FTH1,IST1,FTL,SLC2A3,ATP6V1D,CTSA,HSPA1B,GLIPR1,HBB,MAPK1,CPPED1,KCMF1,CYB5R3,TYROBP,RAP1B,RAC1,IQGAP1,VCL,ARSB,HEXB,CSTB,HVCN1,ATP6AP2,SLC44A2,LILRA2,TNFRSF1B,TMEM179B,CMTM6,RAP2C,ARMC8,MAGT1,DYNC1H1,C…
NEGATIVE REGULATION OF GROWTH%GOBP%GO:0045926	NEGATIVE REGULATION OF GROWTH%GOBP%GO:0045926	1.33639e-05	0.00131445	1.83208	1	MT2A,MT1E,CDKN1A,DUSP10,SMAD3,SERTAD3,FLCN,SEMA3C,SMAD4,SEMA4B,RNF6,EI24,SESN2,VGLL4,HSPA1B,SERTAD2,IP6K2,PRDM11,ING4
NEUTROPHIL DEGRANULATION%GOBP%GO:0043312	NEUTROPHIL DEGRANULATION%GOBP%GO:0043312	1.45299e-05	0.00140267	1.55503	1	IDH1,ANXA2,SDCBP,NPC2,DYNLT1,PLEKHO2,CHI3L1,BRI3,S100A11,HP,METTL7A,C3,ARL8A,MOSPD2,PSEN1,PLAUR,RAB18,PTX3,TOLLIP,ASAH1,CD53,SIRPB1,YPEL5,FCGR2A,TOM1,ADGRE5,PECAM1,CST3,AMPD3,LAMP2,PSAP,GM2A,TIMP2,FTH1,IST1,FTL,SLC2A3,ATP6V1D,CTSA,HSPA1B,GLIPR1,HBB,MAPK1,CPPED1,KCMF1,CYB5R3,TYROBP,RAP1B,RAC1,IQGAP1,VCL,ARSB,HEXB,CSTB,HVCN1,ATP6AP2,SLC44A2,TNFRSF1B,TMEM179B,CMTM6,RAP2C,ARMC8,MAGT1,DYNC1H1,COPB1,B2…
CELL MIGRATION%GOBP%GO:0016477	CELL MIGRATION%GOBP%GO:0016477	1.52102e-05	0.00144165	1.55498	1	CCR7,CXCR3,ITGA5,ANXA1,ADAM17,TNFAIP3,SDCBP,PEX13,TNFAIP1,NR4A2,THBD,SEMA3C,CCL3L3,CCRL2,CDC42,LPAR1,MT-RNR2,LRP12,CD74,SCYL3,GPR183,GCNT1,ICAM1,CX3CR1,SDC4,SEMA4B,ELMO2,CDK1,PECAM1,CD99,CCL24,ZRANB1,RHOQ,LPXN,LGALS12,CCR2,SLC16A3,CCL1,GAB1,PAK4,CCR1,ADAM9,CCL3,NR4A1,SRC,IL6R,AXL,FGFR1,CCL23,TNFRSF10B,CD48,PIK3C2A,RAC1,PDPK1,IQGAP1,GBF1,SGPL1,ARSB,CYP1B1,CD84,TREM1,F11R,MDGA1,PDCD10,LAMB3,ITGA3,F…
NEUTROPHIL ACTIVATION INVOLVED IN IMMUNE RESPONSE%GOBP%GO:0002283	NEUTROPHIL ACTIVATION INVOLVED IN IMMUNE RESPONSE%GOBP%GO:0002283	1.63069e-05	0.001518	1.56324	1	IDH1,ANXA2,SDCBP,NPC2,DYNLT1,PLEKHO2,CHI3L1,BRI3,S100A11,HP,METTL7A,C3,ARL8A,MOSPD2,PSEN1,PLAUR,RAB18,PTX3,TOLLIP,ASAH1,CD53,SIRPB1,YPEL5,FCGR2A,TOM1,ADGRE5,PECAM1,CST3,AMPD3,LAMP2,PSAP,GM2A,TIMP2,FTH1,IST1,FTL,SLC2A3,ATP6V1D,CTSA,HSPA1B,GLIPR1,HBB,MAPK1,CPPED1,KCMF1,CYB5R3,TYROBP,RAP1B,RAC1,IQGAP1,VCL,ARSB,HEXB,CSTB,HVCN1,ATP6AP2,SLC44A2,LILRA2,TNFRSF1B,TMEM179B,CMTM6,RAP2C,ARMC8,MAGT1,DYNC1H1,C…
REGULATION OF LEUKOCYTE DIFFERENTIATION%GOBP%GO:1902105	REGULATION OF LEUKOCYTE DIFFERENTIATION%GOBP%GO:1902105	1.7202e-05	0.00157323	1.80589	1	TNFSF9,ANXA1,DUSP10,HLA-DRA,MYB,CD86,TGFBR2,CD74,TRAF6,HLA-DRB1,CD4,ZBTB1,FCGR2B,RIPK1,MYC,CCR2,FADD,EVI2B,SIGLEC15,IL18,CCR1,CTNNBIP1,CCL3,TNFSF4,SOCS1,AXL,TYROBP,IRF7,TMEM178A,IRF1,TLR4,ZFP36L2,GPR137B,NLRP3,SOCS5,RC3H2,DCSTAMP,RC3H1,CD2,LILRB3,IRF4
MYELOID LEUKOCYTE ACTIVATION%GOBP%GO:0002274	MYELOID LEUKOCYTE ACTIVATION%GOBP%GO:0002274	1.86844e-05	0.00167934	1.53519	1	IDH1,ANXA2,SDCBP,NPC2,DYNLT1,PLEKHO2,CHI3L1,BRI3,S100A11,HP,METTL7A,TGFBR2,C3,ARL8A,MOSPD2,PSEN1,PLAUR,RAB18,PTX3,TOLLIP,ASAH1,CD53,SIRPB1,YPEL5,FCGR2A,TOM1,ADGRE5,PECAM1,CST3,AMPD3,LAMP2,PSAP,FCGR2B,GM2A,MILR1,TIMP2,FTH1,IST1,FTL,SLC2A3,ADAM9,ATP6V1D,CCL3,SLAMF1,CTSA,HSPA1B,GLIPR1,HBB,MAPK1,CPPED1,KCMF1,CYB5R3,TYROBP,RAP1B,RAC1,IQGAP1,VCL,ARSB,HEXB,CSTB,HVCN1,ATP6AP2,SLC44A2,LILRA2,TNFRSF1B,TMEM…
POSITIVE REGULATION OF CELL DIFFERENTIATION%GOBP%GO:0045597	POSITIVE REGULATION OF CELL DIFFERENTIATION%GOBP%GO:0045597	1.98169e-05	0.00175094	1.5334	1	TNFSF9,ANXA1,DUSP10,SMAD3,HLA-DRA,SDCBP,MYB,S100A10,CD86,CRK,SEMA3C,S1PR2,TGFBR2,RRAS,CDC42,CMKLR1,PSEN1,CD74,VEZF1,TRAF6,HLA-DRB1,CTNNB1,ACVR1,MAML1,AR,CD4,PLXNC1,SMAD4,CX3CR1,SCARB2,TWF1,CD53,RGS14,SOX13,ZBTB1,HIF1AN,RIPK1,CCR2,FADD,EVI2B,IL18,CDH2,CCR1,ARNTL,CTNNBIP1,CCL3,TNFSF4,HSPA1B,CAMK1D,RFX3,SOCS1,IL6R,AXL,FGFR1,DLG5,TYROBP,FOXO3,SERPINF1,RAC1,ARSB,CLEC7A,KITLG,F11R,SLC6A6,TNFRSF1B,MMD,W…
GRANULOCYTE ACTIVATION%GOBP%GO:0036230	GRANULOCYTE ACTIVATION%GOBP%GO:0036230	2.07248e-05	0.00180064	1.56312	1	IDH1,ANXA2,SDCBP,NPC2,DYNLT1,PLEKHO2,CHI3L1,BRI3,S100A11,HP,METTL7A,C3,ARL8A,MOSPD2,PSEN1,PLAUR,RAB18,PTX3,TOLLIP,ASAH1,CD53,SIRPB1,YPEL5,FCGR2A,TOM1,ADGRE5,PECAM1,CST3,AMPD3,LAMP2,PSAP,GM2A,TIMP2,FTH1,IST1,FTL,SLC2A3,ATP6V1D,CCL3,CTSA,HSPA1B,GLIPR1,HBB,MAPK1,CPPED1,KCMF1,CYB5R3,TYROBP,RAP1B,RAC1,IQGAP1,VCL,ARSB,HEXB,CSTB,HVCN1,ATP6AP2,SLC44A2,LILRA2,TNFRSF1B,TMEM179B,CMTM6,RAP2C,ARMC8,MAGT1,DYNC…
PD-1 SIGNALING%REACTOME%R-HSA-389948.2	PD-1 SIGNALING%REACTOME%R-HSA-389948.2	2.12048e-05	0.00181214	2.04139	1	HLA-DQB1,HLA-DQA1,HLA-DRA,HLA-DPA1,HLA-DRB1,CD4,HLA-DRB5,HLA-DPB1
RRNA PROCESSING%REACTOME DATABASE ID RELEASE 75%72312	RRNA PROCESSING%REACTOME DATABASE ID RELEASE 75%72312	2.38261e-05	0.00200331	-1.84121	-1	THUMPD1,NAT10,EXOSC8,WDR12,PDCD11,RRP9,MRM1,NOC4L,UTP3,BOP1,PNO1,GAR1,RRP7A,WDR46,UTP14A,RPL36A,NOL6,TSR1,NOP56,NOP58,RPP25,EXOSC5,PES1,RBM28,DHX37,WDR36,RCL1,SENP3,EXOSC2,MPHOSPH10,NOL12,UTP20,IMP4,NCL,GNL3,ELAC2,EMG1,DDX21,WDR43,EBNA1BP2,TEX10,TSR3,TBL3,LAS1L,RPL26L1,EXOSC7,WDR18,UTP15,DDX49,BMS1,RIOK1,LTV1,RPP40,PWP2,CSNK1E,EXOSC4,RRP1,HEATR1,RPL14,UTP4
PHOSPHORYLATION OF CD3 AND TCR ZETA CHAINS%REACTOME DATABASE ID RELEASE 75%202427	PHOSPHORYLATION OF CD3 AND TCR ZETA CHAINS%REACTOME DATABASE ID RELEASE 75%202427	2.68312e-05	0.00221106	2.02715	1	HLA-DQB1,HLA-DQA1,HLA-DRA,HLA-DPA1,HLA-DRB1,CD4,HLA-DRB5,HLA-DPB1
POSITIVE REGULATION OF CHOLESTEROL TRANSPORT%GOBP%GO:0032376	POSITIVE REGULATION OF CHOLESTEROL TRANSPORT%GOBP%GO:0032376	2.78732e-05	0.00221106	2.02598	1	ANXA2,NR1H2,ABCA1,EEPD1,NFKBIA,LDLRAP1
POSITIVE REGULATION OF HEMOPOIESIS%GOBP%GO:1903708	POSITIVE REGULATION OF HEMOPOIESIS%GOBP%GO:1903708	2.79934e-05	0.00221106	1.83723	1	TNFSF9,ANXA1,DUSP10,HLA-DRA,MYB,CD86,TGFBR2,CD74,TRAF6,HLA-DRB1,CD4,ZBTB1,RIPK1,FADD,EVI2B,IL18,CCR1,CTNNBIP1,TNFSF4,HSPA1B,SOCS1,AXL,TYROBP,FOXO3,KITLG,BRD1,MAPK14,NLRP3,SOCS5,HMGB2,FAM210B
POSITIVE REGULATION OF STEROL TRANSPORT%GOBP%GO:0032373	POSITIVE REGULATION OF STEROL TRANSPORT%GOBP%GO:0032373	2.78732e-05	0.00221106	2.02598	1	ANXA2,NR1H2,ABCA1,EEPD1,NFKBIA,LDLRAP1
REGULATION OF CELLULAR RESPONSE TO TRANSFORMING GROWTH FACTOR BETA STIMULUS%GOBP%GO:1903844	REGULATION OF CELLULAR RESPONSE TO TRANSFORMING GROWTH FACTOR BETA STIMULUS%GOBP%GO:1903844	3.07072e-05	0.0023892	1.8977	1	CDKN1C,SMAD3,ADAM17,SDCBP,FLCN,TGFBR2,RNF111,ZBTB7A,SMAD4,CD109,SPRY1,CITED2,LATS1,FAM89B,PDPK1,ITGA3,TGFBR1,BCL9L,THBS1,SMURF2,SKI,MPP5,LEMD3,TRIM33,SPRED2,CAV1,PPM1A,ZNF451
REGULATION OF CELLULAR RESPONSE TO GROWTH FACTOR STIMULUS%GOBP%GO:0090287	REGULATION OF CELLULAR RESPONSE TO GROWTH FACTOR STIMULUS%GOBP%GO:0090287	3.68994e-05	0.00267162	1.80612	1	CDKN1C,MYO1C,ITGA5,SMAD3,ADAM17,SDCBP,FLCN,SORL1,TGFBR2,RNF111,ZBTB7A,SMAD4,XIAP,CD109,SPRY1,CITED2,SPRY3,FGFR1,LATS1,FAM89B,PDPK1,ITGA3,TGFBR1,BCL9L,THBS1,SMURF2,SKI,MPP5,GPC1,SULF2,LEMD3,TRIM33,SPRED2,CAV1,NPTN,PPM1A,ZNF451,NOTCH1,DAB2,ZDHHC17
REGULATION OF TRANSMEMBRANE RECEPTOR PROTEIN SERINE/THREONINE KINASE SIGNALING PATHWAY%GOBP%GO:0090092	REGULATION OF TRANSMEMBRANE RECEPTOR PROTEIN SERINE/THREONINE KINASE SIGNALING PATHWAY%GOBP%GO:0090092	3.64549e-05	0.00267162	1.83092	1	CDKN1C,SMAD3,ADAM17,SDCBP,FLCN,SORL1,TGFBR2,RNF111,ZBTB7A,TTK,ACVR1,SMAD4,XIAP,CD109,SPRY1,CITED2,LATS1,FAM89B,PDPK1,ITGA3,TGFBR1,BCL9L,THBS1,SMURF2,GDF15,SKI,MPP5,LEMD3,TRIM33,WWTR1,SPRED2,CAV1,PPM1A,ZNF451,NOTCH1,ACVR2B,DAB2
SIGNAL TRANSDUCTION INVOLVED IN DNA DAMAGE CHECKPOINT%GOBP%GO:0072422	SIGNAL TRANSDUCTION INVOLVED IN DNA DAMAGE CHECKPOINT%GOBP%GO:0072422	3.60353e-05	0.00267162	1.89174	1	BTG2,CDKN1A,MDM2,CNOT4,CDC5L,ARID3A,CDK1,E2F7,CNOT8,CDC25C,DTL,E2F8
SIGNAL TRANSDUCTION INVOLVED IN DNA INTEGRITY CHECKPOINT%GOBP%GO:0072401	SIGNAL TRANSDUCTION INVOLVED IN DNA INTEGRITY CHECKPOINT%GOBP%GO:0072401	3.60353e-05	0.00267162	1.89174	1	BTG2,CDKN1A,MDM2,CNOT4,CDC5L,ARID3A,CDK1,E2F7,CNOT8,CDC25C,DTL,E2F8
TRANSLOCATION OF ZAP-70 TO IMMUNOLOGICAL SYNAPSE%REACTOME DATABASE ID RELEASE 75%202430	TRANSLOCATION OF ZAP-70 TO IMMUNOLOGICAL SYNAPSE%REACTOME DATABASE ID RELEASE 75%202430	3.62922e-05	0.00267162	1.9953	1	HLA-DQB1,HLA-DQA1,HLA-DRA,HLA-DPA1,HLA-DRB1,CD4,HLA-DRB5,HLA-DPB1
NEGATIVE REGULATION OF IMMUNE SYSTEM PROCESS%GOBP%GO:0002683	NEGATIVE REGULATION OF IMMUNE SYSTEM PROCESS%GOBP%GO:0002683	4.2579e-05	0.00304061	1.68212	1	PTGER4,MICB,LDLR,ANXA1,TNFAIP3,CD86,BCL10,NR1H2,HAVCR2,A2M,SAMSN1,HLA-DRB1,HMOX1,SDC4,TICAM1,RIN3,SEC14L1,FCGR2B,MILR1,MYC,LPXN,CCR2,FADD,TRIM21,CCL3,TNFSF4,SOCS1,DLG5,TYROBP,TMEM178A,CD84,LILRA2,IRF1,TLR6,TLR4,HLA-DOA,C5AR2,THBS1,TRAFD1,SFTPD,GPR137B,SOCS5,RC3H2,METTL14,GRN,CD55,RC3H1,SERPING1,NOTCH1,LILRB3,GBP1,LGALS3,LYN,ERBIN,CTR9,LDB1,PTPN22,OCIAD1,LILRB4,TNFAIP8L2,MICA
PROTEIN AUTOUBIQUITINATION%GOBP%GO:0051865	PROTEIN AUTOUBIQUITINATION%GOBP%GO:0051865	4.4107e-05	0.00310716	1.95319	1	KLHL24,MDM2,RNF4,RNF19B,CNOT4,RNF41,TRAF6,RNF122,RNF185,TRIM21,RNF146,TRIM37,WWP2,RNF13,DTX3L,DDB2,TRIM13
REGULATION OF TRANSFORMING GROWTH FACTOR BETA RECEPTOR SIGNALING PATHWAY%GOBP%GO:0017015	REGULATION OF TRANSFORMING GROWTH FACTOR BETA RECEPTOR SIGNALING PATHWAY%GOBP%GO:0017015	5.05978e-05	0.00351688	1.89735	1	CDKN1C,SMAD3,ADAM17,SDCBP,FLCN,TGFBR2,RNF111,ZBTB7A,SMAD4,CD109,SPRY1,CITED2,LATS1,FAM89B,PDPK1,ITGA3,TGFBR1,BCL9L,THBS1,SMURF2,SKI,MPP5,LEMD3,TRIM33,SPRED2,CAV1,PPM1A,ZNF451
MAJOR PATHWAY OF RRNA PROCESSING IN THE NUCLEOLUS AND CYTOSOL%REACTOME%R-HSA-6791226.3	MAJOR PATHWAY OF RRNA PROCESSING IN THE NUCLEOLUS AND CYTOSOL%REACTOME%R-HSA-6791226.3	5.58929e-05	0.00374671	-1.79196	-1	EXOSC8,WDR12,PDCD11,RRP9,NOC4L,UTP3,BOP1,PNO1,RRP7A,WDR46,UTP14A,RPL36A,NOL6,TSR1,NOP56,NOP58,RPP25,EXOSC5,PES1,RBM28,DHX37,WDR36,RCL1,SENP3,EXOSC2,MPHOSPH10,NOL12,UTP20,IMP4,NCL,GNL3,EMG1,DDX21,WDR43,EBNA1BP2,TEX10,TBL3,LAS1L,RPL26L1,EXOSC7,WDR18,UTP15,DDX49,BMS1,RIOK1,LTV1,RPP40,PWP2,CSNK1E,EXOSC4,RRP1,HEATR1,RPL14,UTP4
POSITIVE REGULATION OF LYMPHOCYTE DIFFERENTIATION%GOBP%GO:0045621	POSITIVE REGULATION OF LYMPHOCYTE DIFFERENTIATION%GOBP%GO:0045621	5.60604e-05	0.00374671	1.88815	1	TNFSF9,ANXA1,DUSP10,HLA-DRA,MYB,CD86,TGFBR2,HLA-DRB1,ZBTB1,IL18,TNFSF4,SOCS1,AXL
RRNA MODIFICATION IN THE NUCLEUS AND CYTOSOL%REACTOME%R-HSA-6790901.4	RRNA MODIFICATION IN THE NUCLEUS AND CYTOSOL%REACTOME%R-HSA-6790901.4	5.56585e-05	0.00374671	-2.03834	-1	THUMPD1,NAT10,PDCD11,RRP9,NOC4L,UTP3,PNO1,GAR1,RRP7A,WDR46,UTP14A,NOL6,NOP56,NOP58,DHX37,WDR36,RCL1,MPHOSPH10,UTP20,IMP4,EMG1,WDR43,TSR3,TBL3,UTP15,DDX49,BMS1,PWP2,HEATR1,UTP4
COSTIMULATION BY THE CD28 FAMILY%REACTOME%R-HSA-388841.3	COSTIMULATION BY THE CD28 FAMILY%REACTOME%R-HSA-388841.3	5.79582e-05	0.00382451	1.91263	1	HLA-DQB1,HLA-DQA1,HLA-DRA,HLA-DPA1,CD86,CDC42,HLA-DRB1,CD4,HLA-DRB5,RAC1,PDPK1,RICTOR,PPP2CB,HLA-DPB1,MAP3K8,PPP2R5C
AUTOPHAGY OF MITOCHONDRION%GOBP%GO:0000422	AUTOPHAGY OF MITOCHONDRION%GOBP%GO:0000422	6.16929e-05	0.00382864	1.99734	1	SQSTM1,ATG14,WIPI2,GABARAPL1,ATG13,GABARAP,WDR45B,CISD2,BECN1,ATG9A,AMBRA1,WIPI1,MARK2,GABARAPL2,WDR45
HALLMARK_MYC_TARGETS_V2%MSIGDB_C2%HALLMARK_MYC_TARGETS_V2	HALLMARK_MYC_TARGETS_V2%MSIGDB_C2%HALLMARK_MYC_TARGETS_V2	6.12571e-05	0.00382864	-2.07472	-1	HK2,RRP9,SRM,NOC4L,NOLC1,UNG,MYBBP1A,WDR74,PA2G4,NOP56,EXOSC5,PPAN,SLC19A1,TCOF1,PES1,NDUFAF4,NOP16,SORD,RCL1,MPHOSPH10,UTP20,IMP4,GNL3,MCM5,WDR43,PPRC1,DCTPP1,LAS1L
MITOCHONDRION DISASSEMBLY%GOBP%GO:0061726	MITOCHONDRION DISASSEMBLY%GOBP%GO:0061726	6.16929e-05	0.00382864	1.99734	1	SQSTM1,ATG14,WIPI2,GABARAPL1,ATG13,GABARAP,WDR45B,CISD2,BECN1,ATG9A,AMBRA1,WIPI1,MARK2,GABARAPL2,WDR45
POSITIVE REGULATION OF LOCOMOTION%GOBP%GO:0040017	POSITIVE REGULATION OF LOCOMOTION%GOBP%GO:0040017	6.08342e-05	0.00382864	1.57429	1	CCR7,MYO1C,ANXA1,ADAM17,SDCBP,S100A11,STX3,SEMA3C,RRAS,MOSPD2,CMKLR1,CD74,ICAM1,ACVR1,HMOX1,TMEM102,SEMA4B,PECAM1,CD40,CD99,CCL24,CAV2,CCR2,FADD,INSR,CHMP3,CCL1,TIRAP,GAB1,CCR1,ADAM9,CCL3,MAP3K3,DAPK2,CAMK1D,SRC,IL6R,MAPK1,FGFR1,CHMP2B,PIK3C2A,FAM89B,RDX,RAC1,PDPK1,MAP2K3,CLEC7A,PDCD10,PTGS2,CRKL,ZNF268,TGFBR1,RAB11A,ZNF304,THBS1,SMURF2,MAPRE2,MAPK14,ENPP2,SPAG9,DMTN,GATA2,EPHA1,ARHGEF7,ITGAX,BCA…
REGULATION OF T CELL ACTIVATION%GOBP%GO:0050863	REGULATION OF T CELL ACTIVATION%GOBP%GO:0050863	5.99672e-05	0.00382864	1.71191	1	TNFSF9,CCR7,ANXA1,DUSP10,HLA-DRA,TNFSF14,HLA-DPA1,MYB,CD86,HAVCR2,TGFBR2,CDC42,HLA-DRB1,CD4,SIRPB1,SDC4,ZBTB1,FCGR2B,NCK1,CCR2,FADD,IL18,TNFSF4,SOCS1,SRC,DLG5,RAC1,PDPK1,TFRC,TNFRSF1B,IRF1,HLA-DMB,HLA-DPB1,SFTPD,NLRP3,SOCS5,RC3H2,CD6,MAP3K8,CAV1,CD55,RC3H1,CD2,IRF4,CARD11,IL6ST,LGALS3,LYN,TESPA1,PTPN22,PRDM1,LILRB4,TNFAIP8L2,VNN1
POSITIVE REGULATION OF T CELL ACTIVATION%GOBP%GO:0050870	POSITIVE REGULATION OF T CELL ACTIVATION%GOBP%GO:0050870	6.37266e-05	0.00390831	1.79009	1	TNFSF9,CCR7,ANXA1,DUSP10,HLA-DRA,TNFSF14,HLA-DPA1,MYB,CD86,TGFBR2,CDC42,HLA-DRB1,SIRPB1,ZBTB1,NCK1,CCR2,FADD,IL18,TNFSF4,SOCS1,SRC,RAC1,PDPK1,TFRC,HLA-DMB,HLA-DPB1,NLRP3,SOCS5,CD6,MAP3K8,CAV1,CD55
NUCLEOSIDE PHOSPHATE BIOSYNTHETIC PROCESS%GOBP%GO:1901293	NUCLEOSIDE PHOSPHATE BIOSYNTHETIC PROCESS%GOBP%GO:1901293	6.85001e-05	0.0041045	-1.83812	-1	ACOT7,HK2,PPAT,CTPS1,ACSL4,DHODH,SCD5,SLC26A2,ATIC,IMPDH1,LDHA,HK1,FASN,GCDH,CMPK1,DUT,NAPRT,PFAS,RFK,ACACA,NAMPT,MTHFD1,HACD2,CAD,ADSL,ELOVL6,IMPDH2,PARP10,PDHA1,TGFB1,ACSF3,RRM2B,TPI1,NME2,COASY,PNP,PARP16,NNMT,CYC1,GAPDH,PKM,NADK,AK1,PFKL,ACSS1,DCTD,HAAO,SLC35B3,PFKM,ENO1,ENO3,ALDOA,DLAT,DCAKD,DTYMK,PRPSAP1,ADCY9,UMPS,AK4
REGULATION OF LEUKOCYTE CELL-CELL ADHESION%GOBP%GO:1903037	REGULATION OF LEUKOCYTE CELL-CELL ADHESION%GOBP%GO:1903037	6.81348e-05	0.0041045	1.72265	1	TNFSF9,CCR7,ANXA1,DUSP10,HLA-DRA,TNFSF14,HLA-DPA1,MYB,CD86,HAVCR2,TGFBR2,CDC42,TRAF6,HLA-DRB1,SIRPB1,SDC4,ZBTB1,FCGR2B,NCK1,CCR2,FADD,IL18,TNFSF4,SOCS1,SRC,DLG5,RAC1,PDPK1,TFRC,IRF1,HLA-DMB,HLA-DPB1,SFTPD,NLRP3,SOCS5,RC3H2,CD6,MAP3K8,CAV1,CD55,RC3H1
REGULATION OF PROTEIN KINASE ACTIVITY%GOBP%GO:0045859	REGULATION OF PROTEIN KINASE ACTIVITY%GOBP%GO:0045859	6.95396e-05	0.00411943	1.47559	1	CDKN1C,CCR7,NCF1,CDKN1A,DUSP10,ADAM17,IRAK2,CCNG2,CD86,SORL1,CRK,CHI3L1,S1PR2,TGFBR2,RGS2,TRAF6,AVPI1,CCNF,CD4,CCNE2,ARHGEF5,RGS14,SERTAD1,CHP1,CCNYL1,TAB2,PKIG,CARD10,CCNG1,CDK1,CD40,TRIB2,ZFP91,RIPK1,CALM1,PDCD4,ADRB2,INSR,SPRY1,TIRAP,SMG8,CBL,AIDA,IL18,PAK4,ADAM9,CDC25C,SRC,IL6R,MAPK1,SPRY3,FGFR1,TNFRSF10B,SNX9,LATS1,TRIB1,PDPK1,IQGAP1,MAP2K3,RICTOR,PDCD10,SMPD1,DUSP5,MMD,SH3BP5L,TLR6,RAP2C,CR…
POSITIVE REGULATION OF IMMUNE RESPONSE%GOBP%GO:0050778	POSITIVE REGULATION OF IMMUNE RESPONSE%GOBP%GO:0050778	7.31087e-05	0.0042822	1.45845	1	CCR7,MICB,MYO1C,HLA-DQB1,HLA-DQA1,ANXA1,TNFAIP3,HLA-DRA,IRAK2,HLA-DPA1,MYB,CD86,BCL10,CRK,C3,CDC42,CMKLR1,CD74,TRAF6,FBXO38,POLR3B,HLA-DRB1,CD4,HLA-DRB5,ZCCHC3,PIK3R4,TAB2,ELMO2,FCGR2A,RELB,ZBTB1,TICAM1,CD40,FCGR2B,RIPK1,NCK1,CCR2,FADD,WIPF2,BTRC,TIFA,BAIAP2,TIRAP,PLEKHA1,IL18,TNFSF4,SH2B2,HSPA1B,CD38,BIRC3,SRC,MAPK1,TYROBP,IRF7,RAC1,PDPK1,TFRC,PSMD5,TANK,LILRA2,TLR6,HLA-DMB,DDX58,TLR4,GBP5,SLC15…
NUCLEOTIDE BIOSYNTHETIC PROCESS%GOBP%GO:0009165	NUCLEOTIDE BIOSYNTHETIC PROCESS%GOBP%GO:0009165	7.70669e-05	0.00446389	-1.85846	-1	ACOT7,HK2,PPAT,CTPS1,ACSL4,DHODH,SCD5,SLC26A2,ATIC,IMPDH1,LDHA,HK1,FASN,GCDH,CMPK1,DUT,NAPRT,PFAS,RFK,ACACA,NAMPT,MTHFD1,HACD2,CAD,ADSL,ELOVL6,IMPDH2,PARP10,PDHA1,TGFB1,ACSF3,RRM2B,TPI1,COASY,PNP,PARP16,NNMT,CYC1,GAPDH,PKM,NADK,PFKL,ACSS1,DCTD,HAAO,SLC35B3,PFKM,ENO1,ENO3,ALDOA,DLAT,DCAKD,DTYMK,PRPSAP1,ADCY9,UMPS
ACTIVATION OF IMMUNE RESPONSE%GOBP%GO:0002253	ACTIVATION OF IMMUNE RESPONSE%GOBP%GO:0002253	8.0319e-05	0.00460113	1.52449	1	MICB,MYO1C,HLA-DQB1,HLA-DQA1,TNFAIP3,HLA-DRA,IRAK2,HLA-DPA1,BCL10,CRK,C3,CDC42,CMKLR1,TRAF6,HLA-DRB1,CD4,HLA-DRB5,ZCCHC3,PIK3R4,TAB2,ELMO2,FCGR2A,RELB,TICAM1,CD40,FCGR2B,RIPK1,NCK1,FADD,WIPF2,BTRC,TIFA,BAIAP2,TIRAP,PLEKHA1,SH2B2,CD38,BIRC3,SRC,MAPK1,TYROBP,IRF7,RAC1,PDPK1,PSMD5,TANK,LILRA2,TLR6,DDX58,TLR4,OTULIN,C5AR2,HLA-DPB1,WASF2,ACTR2,RPS6KA5,MAPKAPK2,SFTPD,MFAP4,TLR7,RC3H2,CLEC10A,ICAM2,LACC…
POSITIVE REGULATION OF CELL MOTILITY%GOBP%GO:2000147	POSITIVE REGULATION OF CELL MOTILITY%GOBP%GO:2000147	8.18625e-05	0.00463858	1.55721	1	CCR7,MYO1C,ANXA1,ADAM17,SDCBP,S100A11,SEMA3C,RRAS,MOSPD2,CMKLR1,CD74,ICAM1,ACVR1,HMOX1,TMEM102,SEMA4B,PECAM1,CD40,CD99,CCL24,CCR2,FADD,INSR,CCL1,TIRAP,GAB1,CCR1,ADAM9,CCL3,MAP3K3,DAPK2,CAMK1D,SRC,IL6R,MAPK1,FGFR1,PIK3C2A,FAM89B,RDX,RAC1,PDPK1,MAP2K3,CLEC7A,PDCD10,PTGS2,CRKL,ZNF268,TGFBR1,RAB11A,ZNF304,THBS1,SMURF2,MAPRE2,MAPK14,ENPP2,SPAG9,DMTN,GATA2,EPHA1,ARHGEF7,ITGAX,BCAS3,GRN,CAV1,RHOC,SRGAP2…
DNA DAMAGE RESPONSE, SIGNAL TRANSDUCTION BY P53 CLASS MEDIATOR%GOBP%GO:0030330	DNA DAMAGE RESPONSE, SIGNAL TRANSDUCTION BY P53 CLASS MEDIATOR%GOBP%GO:0030330	8.40535e-05	0.00468403	1.86154	1	BTG2,CDKN1A,MDM2,CNOT4,ARID3A,CDK1,E2F7,CNOT8,SESN2,CDC25C,BCL3,E2F8,USP10,ING4
REGULATION OF LYMPHOCYTE ACTIVATION%GOBP%GO:0051249	REGULATION OF LYMPHOCYTE ACTIVATION%GOBP%GO:0051249	8.44616e-05	0.00468403	1.60551	1	TNFSF9,CCR7,ANXA1,DUSP10,TNFAIP3,HLA-DRA,TNFSF14,HLA-DPA1,MYB,CD86,HAVCR2,SAMSN1,TGFBR2,CDC42,CD74,GPR183,HLA-DRB1,CD4,SIRPB1,SDC4,ZBTB1,TICAM1,CD40,FCGR2B,NCK1,CCR2,FADD,TIRAP,DCAF15,IL18,TNFSF4,CD38,SOCS1,SRC,AXL,DLG5,TYROBP,RAC1,PDPK1,TFRC,CLEC7A,TNFRSF1B,IRF1,HLA-DMB,ZFP36L2,HLA-DPB1,SFTPD,NLRP3,SOCS5,KMT5B,RC3H2,CD6,MAP3K8,CAV1,CD55,RC3H1,SLC15A4,CD2
RIBOSE PHOSPHATE BIOSYNTHETIC PROCESS%GOBP%GO:0046390	RIBOSE PHOSPHATE BIOSYNTHETIC PROCESS%GOBP%GO:0046390	8.60107e-05	0.00471972	-1.90895	-1	ACOT7,HK2,CTPS1,ACSL4,DHODH,SCD5,SLC26A2,ATIC,IMPDH1,LDHA,HK1,FASN,GCDH,CMPK1,PFAS,RFK,ACACA,HACD2,CAD,ADSL,ELOVL6,IMPDH2,PDHA1,TGFB1,ACSF3
POSITIVE REGULATION OF TUMOR NECROSIS FACTOR PRODUCTION%GOBP%GO:0032760	POSITIVE REGULATION OF TUMOR NECROSIS FACTOR PRODUCTION%GOBP%GO:0032760	9.1844e-05	0.00498732	1.91232	1	HAVCR2,PSEN1,RIPK1,CCR2,FADD,TIRAP,CCL3,TYROBP,CLEC7A,LILRA2,DDX58,TLR4,THBS1,FRMD8,CD2,IFIH1
REGULATION OF HEMOPOIESIS%GOBP%GO:1903706	REGULATION OF HEMOPOIESIS%GOBP%GO:1903706	9.48685e-05	0.00509845	1.55994	1	TNFSF9,ANXA1,DUSP10,HLA-DRA,FLCN,MYB,CD86,TNRC6C,TGFBR2,CNOT4,CD74,TRAF6,TNRC6A,HLA-DRB1,CD4,FNIP1,ZBTB1,FCGR2B,RIPK1,MYC,CCR2,FADD,EVI2B,SIGLEC15,IL18,CCR1,CTNNBIP1,CCL3,TNFSF4,HSPA1B,SOCS1,AXL,TYROBP,IRF7,FOXO3,TMEM178A,KITLG,PSMD5,TNRC6B,IRF1,BRD1,TLR4,ZFP36L2,THBS1,MAPK14,GPR137B,GATA2,NLRP3,SOCS5,HMGB2,FAM210B,RC3H2,METTL14,DCSTAMP,RC3H1,PSMD11,CD2,NOTCH1,LILRB3,IRF4,LGALS3,CASP8,LYN,CTR9,FA…
RESPONSE TO TOXIC SUBSTANCE%GOBP%GO:0009636	RESPONSE TO TOXIC SUBSTANCE%GOBP%GO:0009636	9.78978e-05	0.00520756	1.80632	1	MT2A,MT1E,ANXA1,TNFAIP3,HP,SESN1,MAPK7,HMOX1,SNN,RIPK1,SESN2,PLEKHA1,ADAM9,CCL3,HBB,MAPK1,NFE2L2,CYP1B1,PDCD10,NQO1,CHRNB1,B2M
POSITIVE REGULATION OF T CELL DIFFERENTIATION%GOBP%GO:0045582	POSITIVE REGULATION OF T CELL DIFFERENTIATION%GOBP%GO:0045582	0.000101466	0.00534287	1.89058	1	TNFSF9,ANXA1,DUSP10,HLA-DRA,MYB,CD86,TGFBR2,HLA-DRB1,ZBTB1,IL18,TNFSF4,SOCS1
POSITIVE REGULATION OF LEUKOCYTE CELL-CELL ADHESION%GOBP%GO:1903039	POSITIVE REGULATION OF LEUKOCYTE CELL-CELL ADHESION%GOBP%GO:1903039	0.000103547	0.00538756	1.75161	1	TNFSF9,CCR7,ANXA1,DUSP10,HLA-DRA,TNFSF14,HLA-DPA1,MYB,CD86,TGFBR2,CDC42,TRAF6,HLA-DRB1,SIRPB1,ZBTB1,NCK1,CCR2,FADD,IL18,TNFSF4,SOCS1,SRC,RAC1,PDPK1,TFRC,HLA-DMB,HLA-DPB1,NLRP3,SOCS5,CD6,MAP3K8,CAV1,CD55
REGULATION OF LIPID METABOLIC PROCESS%GOBP%GO:0019216	REGULATION OF LIPID METABOLIC PROCESS%GOBP%GO:0019216	0.000104382	0.00538756	1.65869	1	CCR7,LDLR,IDI1,PIK3IP1,ANXA1,CNEP1R1,MVK,ALAS1,NPC2,SORL1,NR1H2,ABCA1,HELZ2,C3,LACTB,ACSL1,CD74,ATG14,ASAH1,DHCR7,PDP2,CHP1,PIK3R4,PSAP,ID2,MTMR9,LDLRAP1,PLPP1,ABCG1,ABCD1,GLIPR1,GSTZ1,HMGCR,PTGS2,BBS4,MTMR3,PDE3B,PEX11A,HMGCS1,FGFR3,NFYC,SREBF2,TGS1,SORBS1,FDFT1,ADIPOR1,CAV1,ADIPOR2,FDPS,FLT3,PPARD,PIP4K2C,SC5D,AMBRA1,WDR91,FMO5,LSS,ELOVL5,ERLIN2
POSITIVE REGULATION OF CELL MIGRATION%GOBP%GO:0030335	POSITIVE REGULATION OF CELL MIGRATION%GOBP%GO:0030335	0.000107523	0.00549528	1.56017	1	CCR7,MYO1C,ANXA1,ADAM17,SDCBP,S100A11,SEMA3C,RRAS,MOSPD2,CMKLR1,CD74,ICAM1,ACVR1,HMOX1,TMEM102,SEMA4B,PECAM1,CD40,CD99,CCL24,CCR2,FADD,INSR,CCL1,TIRAP,GAB1,CCR1,ADAM9,CCL3,MAP3K3,DAPK2,CAMK1D,SRC,IL6R,MAPK1,FGFR1,PIK3C2A,FAM89B,RDX,RAC1,PDPK1,MAP2K3,CLEC7A,PDCD10,PTGS2,CRKL,ZNF268,TGFBR1,RAB11A,ZNF304,THBS1,SMURF2,MAPRE2,MAPK14,ENPP2,SPAG9,DMTN,GATA2,EPHA1,ARHGEF7,ITGAX,BCAS3,GRN,CAV1,RHOC,SRGAP2…
IMMUNE RESPONSE-ACTIVATING SIGNAL TRANSDUCTION%GOBP%GO:0002757	IMMUNE RESPONSE-ACTIVATING SIGNAL TRANSDUCTION%GOBP%GO:0002757	0.000111385	0.00552772	1.50765	1	MICB,MYO1C,HLA-DQB1,HLA-DQA1,TNFAIP3,HLA-DRA,IRAK2,HLA-DPA1,BCL10,CRK,CDC42,CMKLR1,TRAF6,HLA-DRB1,CD4,HLA-DRB5,PIK3R4,TAB2,ELMO2,FCGR2A,RELB,TICAM1,CD40,FCGR2B,RIPK1,NCK1,FADD,WIPF2,BTRC,TIFA,BAIAP2,TIRAP,PLEKHA1,SH2B2,CD38,BIRC3,SRC,MAPK1,TYROBP,IRF7,RAC1,PDPK1,PSMD5,TANK,LILRA2,TLR6,DDX58,TLR4,OTULIN,C5AR2,HLA-DPB1,WASF2,ACTR2,RPS6KA5,MAPKAPK2,SFTPD,TLR7,RC3H2,CLEC10A,ICAM2,LACC1,FPR1,ARPC2,RC3…
INTRACELLULAR SIGNAL TRANSDUCTION INVOLVED IN G1 DNA DAMAGE CHECKPOINT%GOBP%GO:1902400	INTRACELLULAR SIGNAL TRANSDUCTION INVOLVED IN G1 DNA DAMAGE CHECKPOINT%GOBP%GO:1902400	0.00011452	0.00552772	1.86567	1	BTG2,CDKN1A,MDM2,CNOT4,ARID3A,CDK1,E2F7,CNOT8,CDC25C,E2F8
SIGNAL TRANSDUCTION INVOLVED IN MITOTIC DNA DAMAGE CHECKPOINT%GOBP%GO:1902402	SIGNAL TRANSDUCTION INVOLVED IN MITOTIC DNA DAMAGE CHECKPOINT%GOBP%GO:1902402	0.00011452	0.00552772	1.86567	1	BTG2,CDKN1A,MDM2,CNOT4,ARID3A,CDK1,E2F7,CNOT8,CDC25C,E2F8
SIGNAL TRANSDUCTION INVOLVED IN MITOTIC DNA INTEGRITY CHECKPOINT%GOBP%GO:1902403	SIGNAL TRANSDUCTION INVOLVED IN MITOTIC DNA INTEGRITY CHECKPOINT%GOBP%GO:1902403	0.00011452	0.00552772	1.86567	1	BTG2,CDKN1A,MDM2,CNOT4,ARID3A,CDK1,E2F7,CNOT8,CDC25C,E2F8
SIGNAL TRANSDUCTION INVOLVED IN MITOTIC G1 DNA DAMAGE CHECKPOINT%GOBP%GO:0072431	SIGNAL TRANSDUCTION INVOLVED IN MITOTIC G1 DNA DAMAGE CHECKPOINT%GOBP%GO:0072431	0.00011452	0.00552772	1.86567	1	BTG2,CDKN1A,MDM2,CNOT4,ARID3A,CDK1,E2F7,CNOT8,CDC25C,E2F8
TP53 REGULATES TRANSCRIPTION OF CELL CYCLE GENES%REACTOME DATABASE ID RELEASE 75%6791312	TP53 REGULATES TRANSCRIPTION OF CELL CYCLE GENES%REACTOME DATABASE ID RELEASE 75%6791312	0.000111734	0.00552772	1.90168	1	BTG2,CDKN1A,CNOT4,ARID3A,CCNE2,CDK1,E2F7,CNOT8,CDC25C,E2F8,CNOT6,CCNA1,AURKA,CNOT9,E2F1
DNA DAMAGE RESPONSE, SIGNAL TRANSDUCTION BY P53 CLASS MEDIATOR RESULTING IN CELL CYCLE ARREST%GOBP%GO:0006977	DNA DAMAGE RESPONSE, SIGNAL TRANSDUCTION BY P53 CLASS MEDIATOR RESULTING IN CELL CYCLE ARREST%GOBP%GO:0006977	0.000119008	0.00569162	1.87577	1	BTG2,CDKN1A,MDM2,CNOT4,ARID3A,CDK1,E2F7,CNOT8,CDC25C,E2F8
ANTIGEN PROCESSING AND PRESENTATION OF EXOGENOUS PEPTIDE ANTIGEN VIA MHC CLASS II%GOBP%GO:0019886	ANTIGEN PROCESSING AND PRESENTATION OF EXOGENOUS PEPTIDE ANTIGEN VIA MHC CLASS II%GOBP%GO:0019886	0.000126886	0.0058654	1.78358	1	HLA-DQB1,HLA-DQA1,HLA-DRA,HLA-DPA1,DYNC1LI2,CD74,SEC24B,HLA-DRB1,HLA-DMA,HLA-DRB5,FCGR2B,CAPZA1,HLA-DMB,KIF18A,DYNC1H1,HLA-DOA,HLA-DPB1,KIF23,SEC23A,AP1G1,DCTN6,DCTN2,AP1S3,KIF2C,CAPZB,RACGAP1,CLTA
ANTIGEN PROCESSING AND PRESENTATION OF PEPTIDE ANTIGEN VIA MHC CLASS II%GOBP%GO:0002495	ANTIGEN PROCESSING AND PRESENTATION OF PEPTIDE ANTIGEN VIA MHC CLASS II%GOBP%GO:0002495	0.000126886	0.0058654	1.78358	1	HLA-DQB1,HLA-DQA1,HLA-DRA,HLA-DPA1,DYNC1LI2,CD74,SEC24B,HLA-DRB1,HLA-DMA,HLA-DRB5,FCGR2B,CAPZA1,HLA-DMB,KIF18A,DYNC1H1,HLA-DOA,HLA-DPB1,KIF23,SEC23A,AP1G1,DCTN6,DCTN2,AP1S3,KIF2C,CAPZB,RACGAP1,CLTA
ANTIGEN PROCESSING AND PRESENTATION OF PEPTIDE OR POLYSACCHARIDE ANTIGEN VIA MHC CLASS II%GOBP%GO:0002504	ANTIGEN PROCESSING AND PRESENTATION OF PEPTIDE OR POLYSACCHARIDE ANTIGEN VIA MHC CLASS II%GOBP%GO:0002504	0.000126886	0.0058654	1.78358	1	HLA-DQB1,HLA-DQA1,HLA-DRA,HLA-DPA1,DYNC1LI2,CD74,SEC24B,HLA-DRB1,HLA-DMA,HLA-DRB5,FCGR2B,CAPZA1,HLA-DMB,KIF18A,DYNC1H1,HLA-DOA,HLA-DPB1,KIF23,SEC23A,AP1G1,DCTN6,DCTN2,AP1S3,KIF2C,CAPZB,RACGAP1,CLTA
CLASS A 1 (RHODOPSIN-LIKE RECEPTORS)%REACTOME%R-HSA-373076.8	CLASS A 1 (RHODOPSIN-LIKE RECEPTORS)%REACTOME%R-HSA-373076.8	0.000128267	0.0058654	1.7835	1	PTGER4,CCR7,CXCR3,ANXA1,S1PR2,C3,CCL3L3,CCRL2,LPAR1,CMKLR1,MT-RNR2,GPR183,CX3CR1,PSAP,ADRB2,CCR2,CCL1,CCR1,CCL3
RIBOSOMAL LARGE SUBUNIT BIOGENESIS%GOBP%GO:0042273	RIBOSOMAL LARGE SUBUNIT BIOGENESIS%GOBP%GO:0042273	0.000128013	0.0058654	-1.99198	-1	RRP15,MDN1,WDR12,URB1,HEATR3,BOP1,MRTO4,WDR74,PAK1IP1,MRPL1,NLE1,RPL7L1,PPAN,PES1,NOP16,MAK16,SURF6,GTF3A,NOC2L,RRS1,EBNA1BP2,NIFK
REGULATION OF CELL MIGRATION%GOBP%GO:0030334	REGULATION OF CELL MIGRATION%GOBP%GO:0030334	0.000139889	0.00634123	1.43122	1	PTGER4,CCR7,MYO1C,ANXA1,DUSP10,ADAM17,SDCBP,FLCN,SORL1,S100A11,SEMA3C,RRAS,MOSPD2,CMKLR1,RNF41,CD74,GPR183,ICAM1,SGK1,ACVR1,HMOX1,PLXNC1,CX3CR1,TMEM102,SEMA4B,CARD10,PECAM1,CD40,RIN3,CD99,CCL24,CCR2,FADD,GNA12,INSR,CLIC4,CCL1,TIRAP,GAB1,CCR1,ADAM9,CCL3,CITED2,MAP3K3,DAPK2,CAMK1D,SRC,IL6R,MAPK1,FGFR1,DLG5,PIK3C2A,FAM89B,TRIB1,FOXO3,RDX,RAC1,PDPK1,MAP2K3,VCL,ARSB,CYP1B1,CLEC7A,CAMK2A,PDCD10,SGK3,RA…
REGULATION OF PROTEIN SERINE/THREONINE KINASE ACTIVITY%GOBP%GO:0071900	REGULATION OF PROTEIN SERINE/THREONINE KINASE ACTIVITY%GOBP%GO:0071900	0.000145934	0.00655822	1.53332	1	CDKN1C,CDKN1A,DUSP10,ADAM17,IRAK2,CCNG2,SORL1,CRK,S1PR2,RGS2,TRAF6,AVPI1,CCNF,CCNE2,ARHGEF5,RGS14,SERTAD1,CCNYL1,TAB2,PKIG,CCNG1,CDK1,CD40,TRIB2,RIPK1,CALM1,PDCD4,ADRB2,INSR,SPRY1,AIDA,ADAM9,CDC25C,SRC,MAPK1,SPRY3,FGFR1,LATS1,TRIB1,MAP2K3,PDCD10,SMPD1,DUSP5,TLR6,CRKL,TAOK1,TLR4,TGFBR1,THBS1,MAPK14,SPAG9,GDF15,MAPKAPK2,RAPGEF1,CCNJL,MADD,CCNA1,GHRL,SPRED2,CAV1,TNFRSF11A,FPR1,APC,MAP3K2,CDK7,MAP2K7…
AUTOPHAGOSOME ASSEMBLY%GOBP%GO:0000045	AUTOPHAGOSOME ASSEMBLY%GOBP%GO:0000045	0.00015182	0.00662288	1.86091	1	ATG14,TP53INP2,WIPI2,GABARAPL1,ATG13,TMEM41B,GABARAP,WDR45B,RAB23,RAB1A,BECN1,ATG9A,AMBRA1,WIPI1,RAB1B,GABARAPL2,TP53INP1,WDR45,UBXN2A,VMP1,ATG2A,UBQLN2,TRAPPC8,UBQLN1
HALLMARK_HYPOXIA%MSIGDB_C2%HALLMARK_HYPOXIA	HALLMARK_HYPOXIA%MSIGDB_C2%HALLMARK_HYPOXIA	0.000152454	0.00662288	1.7575	1	MT2A,CDKN1C,MT1E,KLHL24,ANXA2,CDKN1A,TNFAIP3,CCNG2,BNIP3L,KDM3A,PNRC1,PLAUR,NFIL3,HMOX1,HS3ST1,SDC4,AMPD3,SLC2A3,CITED2,RRAGD,FOXO3
POSITIVE REGULATION OF LIPID LOCALIZATION%GOBP%GO:1905954	POSITIVE REGULATION OF LIPID LOCALIZATION%GOBP%GO:1905954	0.000152454	0.00662288	1.90372	1	ANXA2,SPP1,NR1H2,ABCA1,EEPD1,NFKBIA,C3,ACSL1,DBI,LDLRAP1,SREBF2,GHRL,PLIN3,CAV1,TNFRSF11A,P2RX4
POSITIVE REGULATION OF TRANSMEMBRANE RECEPTOR PROTEIN SERINE/THREONINE KINASE SIGNALING PATHWAY%GOBP%GO:0090100	POSITIVE REGULATION OF TRANSMEMBRANE RECEPTOR PROTEIN SERINE/THREONINE KINASE SIGNALING PATHWAY%GOBP%GO:0090100	0.00015182	0.00662288	1.86048	1	CDKN1C,ADAM17,SDCBP,FLCN,RNF111,TTK,ACVR1,SMAD4,CITED2,TGFBR1,THBS1,GDF15,NOTCH1,ACVR2B,DAB2
REGULATION OF MAP KINASE ACTIVITY%GOBP%GO:0043405	REGULATION OF MAP KINASE ACTIVITY%GOBP%GO:0043405	0.000155834	0.00671372	1.67065	1	DUSP10,IRAK2,SORL1,CRK,S1PR2,RGS2,TRAF6,AVPI1,ARHGEF5,RGS14,TAB2,CDK1,CD40,TRIB2,RIPK1,PDCD4,INSR,SPRY1,AIDA,ADAM9,MAPK1,SPRY3,FGFR1,TRIB1,MAP2K3,PDCD10,SMPD1,DUSP5,TLR6,CRKL,TAOK1,TLR4,TGFBR1,THBS1,MAPK14,SPAG9,GDF15,MAPKAPK2,RAPGEF1,MADD,GHRL,SPRED2,CAV1,TNFRSF11A,FPR1,MAP3K2,MAP2K7,FLT3
POSITIVE REGULATION OF CELL ACTIVATION%GOBP%GO:0050867	POSITIVE REGULATION OF CELL ACTIVATION%GOBP%GO:0050867	0.000164678	0.00703661	1.63267	1	TNFSF9,CCR7,CRLF2,ANXA1,DUSP10,HLA-DRA,TNFSF14,HLA-DPA1,MYB,CD86,TGFBR2,CDC42,CD74,GPR183,HLA-DRB1,SIRPB1,ZBTB1,TICAM1,CD40,NCK1,CCR2,FADD,TIRAP,IL18,CCL3,TNFSF4,CD38,SOCS1,SRC,AXL,TYROBP,RAC1,PDPK1,TFRC,CLEC7A,F11R,LILRA2,TLR6,HLA-DMB,TLR4,HLA-DPB1,PLA2G4A,THBS1,DMTN,NLRP3,SOCS5,KMT5B,CD6,MAP3K8,CAV1,CD55
REGULATION OF INFLAMMATORY RESPONSE%GOBP%GO:0050727	REGULATION OF INFLAMMATORY RESPONSE%GOBP%GO:0050727	0.000167484	0.00709834	1.66595	1	PTGER4,CCR7,LDLR,VAMP3,ANXA1,TNFAIP3,MVK,A2M,NFKBIA,C3,MAPK7,HLA-DRB1,XIAP,TICAM1,FCGR2B,RIPK1,PDCD4,CCR2,CCL1,SPATA2,IL18,CCL3,ABCD1,TNFSF4,BIRC3,AREL1,CLEC7A,TNFRSF1B,TLR6,NLRP1,PTGS2,TLR4,GBP5,OTULIN,C5AR2,MAPK14,TLR7,NLRP3,PLD4,PLD3,AOAH,CD6,GHRL,GRN,TNFRSF11A,LACC1,CD55,PPARD,SERPING1,PIK3AP1,NAPEPLD,IL16,ADCY7,SNX4,IL6ST
POSITIVE REGULATION OF CD4-POSITIVE, ALPHA-BETA T CELL DIFFERENTIATION%GOBP%GO:0043372	POSITIVE REGULATION OF CD4-POSITIVE, ALPHA-BETA T CELL DIFFERENTIATION%GOBP%GO:0043372	0.000176238	0.00740912	1.97707	1	ANXA1,HLA-DRA,MYB,CD86,HLA-DRB1,IL18,TNFSF4,SOCS1,NLRP3,SOCS5
HALLMARK_TNFA_SIGNALING_VIA_NFKB%MSIGDB_C2%HALLMARK_TNFA_SIGNALING_VIA_NFKB	HALLMARK_TNFA_SIGNALING_VIA_NFKB%MSIGDB_C2%HALLMARK_TNFA_SIGNALING_VIA_NFKB	0.00017877	0.00745542	1.69846	1	BTG2,PTGER4,LDLR,IFIT2,CDKN1A,TNFAIP3,SOCS3,DNAJB4,ABCA1,RNF19B,SQSTM1,NFKBIA,CCRL2,PNRC1,PLAUR,NFIL3,SGK1,PTX3,SDC4,RELB,SNN,TNFAIP2,MYC,ID2,SLC2A3,IFNGR2,PTPRE,IL18,KDM6B,BIRC3,JUNB,NFE2L2,CD69,TRIB1,CD83,MAP2K3,TANK,SERPINB8,NINJ1,LAMB3,DUSP5,IRF1,KYNU,PTGS2,DDX58,NFKB2,MSC
RIBONUCLEOTIDE BIOSYNTHETIC PROCESS%GOBP%GO:0009260	RIBONUCLEOTIDE BIOSYNTHETIC PROCESS%GOBP%GO:0009260	0.000181429	0.00750628	-1.92449	-1	ACOT7,HK2,CTPS1,ACSL4,DHODH,SCD5,SLC26A2,ATIC,IMPDH1,LDHA,HK1,FASN,GCDH,CMPK1,PFAS,RFK,ACACA,HACD2,CAD,ADSL,ELOVL6,IMPDH2,PDHA1,TGFB1,ACSF3
POSITIVE REGULATION OF CELL CYCLE ARREST%GOBP%GO:0071158	POSITIVE REGULATION OF CELL CYCLE ARREST%GOBP%GO:0071158	0.000194478	0.00798279	1.79722	1	BTG2,CDKN1A,MDM2,CNOT4,ARID3A,CDK1,ID2,E2F7,CNOT8,CDC25C,E2F8
POSITIVE REGULATION OF CHEMOTAXIS%GOBP%GO:0050921	POSITIVE REGULATION OF CHEMOTAXIS%GOBP%GO:0050921	0.000197655	0.0080498	1.83566	1	CCR7,ADAM17,STX3,MOSPD2,CMKLR1,CD74,CCR2,CCL1,TIRAP,CCR1,CCL3,DAPK2,CAMK1D,IL6R,MAPK1,FGFR1,RAC1
TRANSMEMBRANE RECEPTOR PROTEIN TYROSINE KINASE SIGNALING PATHWAY%GOBP%GO:0007169	TRANSMEMBRANE RECEPTOR PROTEIN TYROSINE KINASE SIGNALING PATHWAY%GOBP%GO:0007169	0.0002059	0.00832059	1.50468	1	GFRA2,MYO1C,NCF1,SLA,ADAM17,SDCBP,REPS2,CRK,CDC42,PSEN1,EFNA4,SHCBP1,CD4,RGS14,ELMO2,EIF2AK3,C2CD5,RHOQ,ATP6V1A,CAV2,ADRB2,NCK1,INSR,GALNT3,BAIAP2,GAB1,CBL,ATP6V1D,SH2B2,MTSS1,SRC,MAPK1,AXL,FGFR1,ATP6V0D1,NCF2,PIK3C2A,BCAR3,RAC1,STMN1,PDPK1,IQGAP1,FLRT3,RBFOX2,DDIT4,RASGRP4,WASF2,ACTR2,RPS6KA5,MAPK14,GDF15,ATP6V1G1,MAPKAPK2,PSENEN,FGFR3,RAPGEF1,EPHA1,ARHGEF7,RAB14,NCSTN,SULF2,SORBS1,SPRED2,EFNB2,…
POSITIVE REGULATION OF NEUTROPHIL MIGRATION%GOBP%GO:1902624	POSITIVE REGULATION OF NEUTROPHIL MIGRATION%GOBP%GO:1902624	0.000212673	0.00848072	1.95432	1	CCR7,MOSPD2,CD74,CD99,TIRAP,DAPK2,CAMK1D,RAC1
SIGNAL TRANSDUCTION IN RESPONSE TO DNA DAMAGE%GOBP%GO:0042770	SIGNAL TRANSDUCTION IN RESPONSE TO DNA DAMAGE%GOBP%GO:0042770	0.000213116	0.00848072	1.81314	1	BTG2,CDKN1A,MDM2,CNOT4,CDC5L,ARID3A,CDK1,E2F7,CNOT8,SESN2,CDC25C,DTL,BCL3,E2F8,USP10,ING4,MAPK14,CNOT6,AURKA,CNOT9,E2F1,FOXM1,TFDP2,HIPK2,MDM4,FZR1,BID,PLAGL1,UIMC1,CASP9,TFDP1,CNOT6L,ABL1,EP300,CRADD,KAT5
POSITIVE REGULATION OF CELLULAR RESPONSE TO TRANSFORMING GROWTH FACTOR BETA STIMULUS%GOBP%GO:1903846	POSITIVE REGULATION OF CELLULAR RESPONSE TO TRANSFORMING GROWTH FACTOR BETA STIMULUS%GOBP%GO:1903846	0.000221355	0.00861136	1.94656	1	CDKN1C,ADAM17,SDCBP,FLCN,RNF111,SMAD4,CITED2,THBS1
POSITIVE REGULATION OF TRANSFORMING GROWTH FACTOR BETA RECEPTOR SIGNALING PATHWAY%GOBP%GO:0030511	POSITIVE REGULATION OF TRANSFORMING GROWTH FACTOR BETA RECEPTOR SIGNALING PATHWAY%GOBP%GO:0030511	0.000221355	0.00861136	1.94656	1	CDKN1C,ADAM17,SDCBP,FLCN,RNF111,SMAD4,CITED2,THBS1
REGULATION OF TUMOR NECROSIS FACTOR PRODUCTION%GOBP%GO:0032680	REGULATION OF TUMOR NECROSIS FACTOR PRODUCTION%GOBP%GO:0032680	0.000218942	0.00861136	1.7894	1	TNFAIP3,HAVCR2,PSEN1,CX3CR1,RIPK1,CCR2,FADD,TIRAP,CCL3,SLAMF1,TYROBP,CLEC7A,LILRA2,DDX58,TLR4,C5AR2,THBS1,MAPKAPK2,FRMD8,GHRL,CD2,IFIH1
POSITIVE REGULATION OF CELLULAR COMPONENT MOVEMENT%GOBP%GO:0051272	POSITIVE REGULATION OF CELLULAR COMPONENT MOVEMENT%GOBP%GO:0051272	0.000225924	0.00872401	1.51782	1	CCR7,MYO1C,ANXA1,ADAM17,SDCBP,S100A11,SEMA3C,RRAS,MOSPD2,CMKLR1,CD74,ICAM1,ACVR1,HMOX1,TMEM102,SEMA4B,PECAM1,CD40,CD99,CCL24,CCR2,FADD,INSR,CCL1,TIRAP,GAB1,CCR1,ADAM9,CCL3,MAP3K3,DAPK2,CAMK1D,SRC,IL6R,MAPK1,FGFR1,PIK3C2A,FAM89B,RDX,RAC1,PDPK1,MAP2K3,CLEC7A,PDCD10,PTGS2,CRKL,ZNF268,TGFBR1,RAB11A,ZNF304,THBS1,SMURF2,MAPRE2,MAPK14,ENPP2,SPAG9,DMTN,GATA2,EPHA1,ARHGEF7,ITGAX,BCAS3,GRN,CAV1,RHOC,SRGAP2…
REGULATION OF LEUKOCYTE CHEMOTAXIS%GOBP%GO:0002688	REGULATION OF LEUKOCYTE CHEMOTAXIS%GOBP%GO:0002688	0.000247794	0.00949816	1.80731	1	CCR7,ADAM17,MOSPD2,CMKLR1,CD74,RIN3,CCR2,CCL1,TIRAP,CCR1,CCL3,DAPK2,CAMK1D,IL6R,MAPK1,RAC1,C5AR2,THBS1
POSITIVE REGULATION OF NUCLEAR-TRANSCRIBED MRNA CATABOLIC PROCESS, DEADENYLATION-DEPENDENT DECAY%GOBP%GO:1900153	POSITIVE REGULATION OF NUCLEAR-TRANSCRIBED MRNA CATABOLIC PROCESS, DEADENYLATION-DEPENDENT DECAY%GOBP%GO:1900153	0.000251684	0.00950747	1.92667	1	BTG2,TOB1,TNRC6C,TNRC6A,TNRC6B,ZFP36L2
REGULATION OF NUCLEAR-TRANSCRIBED MRNA CATABOLIC PROCESS, DEADENYLATION-DEPENDENT DECAY%GOBP%GO:1900151	REGULATION OF NUCLEAR-TRANSCRIBED MRNA CATABOLIC PROCESS, DEADENYLATION-DEPENDENT DECAY%GOBP%GO:1900151	0.000251684	0.00950747	1.92667	1	BTG2,TOB1,TNRC6C,TNRC6A,TNRC6B,ZFP36L2
NEGATIVE REGULATION OF DEFENSE RESPONSE%GOBP%GO:0031348	NEGATIVE REGULATION OF DEFENSE RESPONSE%GOBP%GO:0031348	0.000261307	0.00972995	1.72	1	PTGER4,MICB,LDLR,TNFAIP3,MVK,NR1H2,A2M,MAPK7,HLA-DRB1,SEC14L1,FCGR2B,PDCD4,TRIM21,ABCD1,TNFRSF1B,OTULIN,TRAFD1,NLRP3,AOAH,GHRL,GRN,PPARD,SERPING1
T CELL DIFFERENTIATION%GOBP%GO:0030217	T CELL DIFFERENTIATION%GOBP%GO:0030217	0.000259806	0.00972995	1.84586	1	PTGER4,ANXA1,ADAM17,CD74,GPR183,CD4,SOX13,LFNG,FADD
MYELOID LEUKOCYTE MIGRATION%GOBP%GO:0097529	MYELOID LEUKOCYTE MIGRATION%GOBP%GO:0097529	0.000268267	0.00991826	1.82093	1	CCR7,ANXA1,CCL3L3,PECAM1,CCL24,CCR2,CCL1,CCL3,IL6R,CCL23,GBF1,PIP5K1C,UMODL1,SFTPD,TNFRSF11A,P2RX4
SIGNAL TRANSDUCTION INVOLVED IN CELL CYCLE CHECKPOINT%GOBP%GO:0072395	SIGNAL TRANSDUCTION INVOLVED IN CELL CYCLE CHECKPOINT%GOBP%GO:0072395	0.000278531	0.0102252	1.7742	1	BTG2,CDKN1A,MDM2,CNOT4,CDC5L,ARID3A,CDK1,E2F7,CNOT8,CDC25C,DTL,E2F8
NCRNAS INVOLVED IN WNT SIGNALING IN HEPATOCELLULAR CARCINOMA%WIKIPATHWAYS_20201210%WP4336%HOMO SAPIENS	NCRNAS INVOLVED IN WNT SIGNALING IN HEPATOCELLULAR CARCINOMA%WIKIPATHWAYS_20201210%WP4336%HOMO SAPIENS	0.000297119	0.0108313	-1.92052	-1	MTDH,ELAVL1,CCND1,NLK,JUN,CCND2,DVL1
NUCLEIC ACID PHOSPHODIESTER BOND HYDROLYSIS%GOBP%GO:0090305	NUCLEIC ACID PHOSPHODIESTER BOND HYDROLYSIS%GOBP%GO:0090305	0.000308466	0.0110139	-1.79551	-1	EXOSC8,RPA2,ANKLE1,TOE1,NTHL1,NOP9,SETMAR,CASP3,REXO4,CPSF1,PCF11,KPNB1,POLD1,MUS81,DFFA,TSR1,GTF2H3,ERCC2,UBC,FAN1,NYNRIN,RCL1,EXOSC2,UTP20,CPSF3,RRS1,ELAC2,KRI1,GTF2H2,ENDOG,DICER1,NCBP1,TBL3,DFFB,CUL4A
POSITIVE REGULATION OF CHOLESTEROL EFFLUX%GOBP%GO:0010875	POSITIVE REGULATION OF CHOLESTEROL EFFLUX%GOBP%GO:0010875	0.000307756	0.0110139	1.92642	1	NR1H2,ABCA1,EEPD1,NFKBIA,CAV1
POSITIVE REGULATION OF LIPID TRANSPORT%GOBP%GO:0032370	POSITIVE REGULATION OF LIPID TRANSPORT%GOBP%GO:0032370	0.000306166	0.0110139	1.88891	1	ANXA2,SPP1,NR1H2,ABCA1,EEPD1,NFKBIA,ACSL1,DBI,LDLRAP1,GHRL,CAV1,TNFRSF11A,P2RX4
GLYCOSPHINGOLIPID METABOLIC PROCESS%GOBP%GO:0006687	GLYCOSPHINGOLIPID METABOLIC PROCESS%GOBP%GO:0006687	0.000311479	0.0110459	1.86102	1	ST3GAL1,ASAH1,PSAP,GM2A,ST3GAL5,UGCG,CTSA,HEXB,SMPD1,B3GALT4,ST8SIA6,SUMF1,CERK,GALC,NEU1,ESYT2,ARSA,NEU4,CPTP
PURINE NUCLEOTIDE BIOSYNTHETIC PROCESS%GOBP%GO:0006164	PURINE NUCLEOTIDE BIOSYNTHETIC PROCESS%GOBP%GO:0006164	0.000321009	0.011231	-1.81287	-1	ACOT7,HK2,PPAT,ACSL4,SCD5,SLC26A2,ATIC,IMPDH1,LDHA,HK1,FASN,GCDH,PFAS,ACACA,MTHFD1,HACD2,ADSL,ELOVL6,IMPDH2,PDHA1,TGFB1,ACSF3
REACTIVE OXYGEN SPECIES METABOLIC PROCESS%GOBP%GO:0072593	REACTIVE OXYGEN SPECIES METABOLIC PROCESS%GOBP%GO:0072593	0.00032066	0.011231	1.83355	1	NCF1C,NCF1,NCF1B,HBD,SESN1,SESN2,HBB,CYB5R3,NCF2,GBF1,CYP1B1,NQO1
POSITIVE REGULATION OF LEUKOCYTE ACTIVATION%GOBP%GO:0002696	POSITIVE REGULATION OF LEUKOCYTE ACTIVATION%GOBP%GO:0002696	0.00032796	0.0113977	1.60599	1	TNFSF9,CCR7,CRLF2,ANXA1,DUSP10,HLA-DRA,TNFSF14,HLA-DPA1,MYB,CD86,TGFBR2,CDC42,CD74,GPR183,HLA-DRB1,SIRPB1,ZBTB1,TICAM1,CD40,NCK1,CCR2,FADD,TIRAP,IL18,CCL3,TNFSF4,CD38,SOCS1,SRC,AXL,TYROBP,RAC1,PDPK1,TFRC,CLEC7A,TLR6,HLA-DMB,TLR4,HLA-DPB1,THBS1,NLRP3,SOCS5,KMT5B,CD6,MAP3K8,CAV1,CD55
MHC CLASS II ANTIGEN PRESENTATION%REACTOME DATABASE ID RELEASE 75%2132295	MHC CLASS II ANTIGEN PRESENTATION%REACTOME DATABASE ID RELEASE 75%2132295	0.000336982	0.0116337	1.74464	1	HLA-DQB1,HLA-DQA1,HLA-DRA,HLA-DPA1,DYNC1LI2,CD74,SEC24B,HLA-DRB1,HLA-DMA,HLA-DRB5,CTSA,CAPZA1,CTSO,HLA-DMB,KIF18A,DYNC1H1,HLA-DOA,HLA-DPB1,KIF23,SEC23A,AP1G1,DCTN6,DCTN2,AP1S3,KIF2C,CAPZB,RACGAP1,CLTA,CTSB
PEPTIDE LIGAND-BINDING RECEPTORS%REACTOME%R-HSA-375276.5	PEPTIDE LIGAND-BINDING RECEPTORS%REACTOME%R-HSA-375276.5	0.000347563	0.0118421	1.81323	1	CCR7,CXCR3,ANXA1,C3,CCL3L3,CCRL2,MT-RNR2,CX3CR1,PSAP,CCR2,CCL1,CCR1,CCL3
REGULATION OF LEUKOCYTE PROLIFERATION%GOBP%GO:0070663	REGULATION OF LEUKOCYTE PROLIFERATION%GOBP%GO:0070663	0.000346514	0.0118421	1.69558	1	TNFSF9,ANXA1,TNFAIP3,HLA-DPA1,CD86,TGFBR2,CD74,GPR183,HLA-DRB1,SDC4,CD40,FCGR2B,NCK1,CCR2,FADD,TIRAP,IL18,TNFSF4,CD38,MAPK1,DLG5,TYROBP,TFRC,TNFRSF1B,IRF1,HLA-DMB,HLA-DPB1,SFTPD,CD6,CD55,RC3H1
CELLULAR ION HOMEOSTASIS%GOBP%GO:0006873	CELLULAR ION HOMEOSTASIS%GOBP%GO:0006873	0.000357378	0.0120975	1.51722	1	MT2A,MT1E,PTGER4,CCR7,CXCR3,SMAD3,CCRL2,LPAR1,CMKLR1,MT-RNR2,PSEN1,SLC31A2,HMOX1,SMAD4,CX3CR1,CHP1,CD40,CALM1,MYC,ATP6V1A,CAV2,CCR2,FTH1,FTL,CCL1,C19orf12,CCR1,ATP6V1D,CCL3,HEPH,GPR157,FBXL5,CCL23,SLC25A23,ATP6V0D1,TMEM178A,PDPK1,TFRC,ATP6AP2,C5AR2,MCUB,ATP6V1G1,SLC4A8,SLC9B1,RHAG,ANXA6,TPT1,GHRL,GRN,CAV1,SLC40A1,LACC1,CD55,FPR1,P2RX4,NPTN,HTT,RAB20,SLC11A2,SLC24A3,MCU,TMCO1,FLVCR1,ATP6V1C1,GPR35…
NEGATIVE REGULATION OF INFLAMMATORY RESPONSE%GOBP%GO:0050728	NEGATIVE REGULATION OF INFLAMMATORY RESPONSE%GOBP%GO:0050728	0.000370461	0.0124594	1.78187	1	PTGER4,LDLR,TNFAIP3,MVK,MAPK7,HLA-DRB1,FCGR2B,PDCD4,ABCD1,TNFRSF1B,OTULIN,NLRP3,AOAH,GHRL,GRN,PPARD,ADCY7,RB1,MEFV,LILRB4,TNFAIP8L2
AUTOPHAGY%REACTOME%R-HSA-9612973.2	AUTOPHAGY%REACTOME%R-HSA-9612973.2	0.000374748	0.0125228	1.71878	1	RRAGC,SQSTM1,DYNC1LI2,ULK1,ATG14,WIPI2,PIK3R4,ATG4D,LAMP2,CHMP3,TSC1,GABARAPL1,ATG13,VPS37A,HBB,CHMP2B,RRAGD,MTERF3,GABARAP,WDR45B,ARL13B,DYNC1H1,LAMTOR3,PRKAB1,MFN1,MTMR3,PLIN3,BECN1,EEF1A1,ATG9A,AMBRA1,WIPI1
SELENIUM MICRONUTRIENT NETWORK%WIKIPATHWAYS_20201210%WP15%HOMO SAPIENS	SELENIUM MICRONUTRIENT NETWORK%WIKIPATHWAYS_20201210%WP15%HOMO SAPIENS	0.000380308	0.0126277	1.93156	1	LDLR,ALOX5AP,ABCA1,INSR,HBB,KMO,KYNU,PTGS2,NFKB2
PROTEIN LOCALIZATION TO MITOCHONDRION%GOBP%GO:0070585	PROTEIN LOCALIZATION TO MITOCHONDRION%GOBP%GO:0070585	0.000395636	0.0130535	-1.86177	-1	TOMM34,TIMM17B,HK2,DNAJA1,BCS1L,HK1,TOMM40,TIMM44,TOMM5,TIMM9,COX18,PMAIP1,TIMM23B,TIMM22,HSP90AA1,CHCHD4,TOMM40L,DNAJC19
REGULATION OF CELL DIVISION%GOBP%GO:0051302	REGULATION OF CELL DIVISION%GOBP%GO:0051302	0.000400442	0.013129	1.71044	1	FLCN,TXNIP,CDC42,PIK3R4,CALM1,MYC,E2F7,EVI2B,RAB11FIP4,E2F8,SPAST,BBS4,RAB11A,KIF23,ECT2,BECN1,AURKA,PLK4,KLHL9,CETN2,RACGAP1,SH3GLB1,ORC6,SETD2,DLL1
NEGATIVE REGULATION OF DEVELOPMENTAL PROCESS%GOBP%GO:0051093	NEGATIVE REGULATION OF DEVELOPMENTAL PROCESS%GOBP%GO:0051093	0.000405374	0.0132076	1.44303	1	ANXA2,LDLR,CDKN1A,ANXA1,DUSP10,SMAD3,FLCN,DYNLT1,SORL1,NR1H2,ABCA1,SEMA3C,NFKBIA,ATF2,LPAR1,ZKSCAN3,CTNNB1,SMAD4,SEMA4B,CARD10,RNF6,EIF2AK3,CST3,TRIB2,BBS12,LFNG,FCGR2B,PDCD4,MYC,ID2,CCR2,VGLL4,SPRY1,ABCG1,CCR1,ARNTL,CCL3,TNFSF4,MAP3K3,SOCS1,SPRY3,NFATC1,INPP5F,TMEM178A,SERPINF1,TFRC,PDCD10,SRGN,IRF1,TLR4,SUFU,TGFBR1,B2M,BRCA2,ZFP36L2,PRICKLE1,THBS1,PDE3B,GDF15,DMTN,FGFR3,GPR137B,SKI,GATA2,FOXA2,…
CELL CHEMOTAXIS%GOBP%GO:0060326	CELL CHEMOTAXIS%GOBP%GO:0060326	0.000408902	0.0132398	1.7582	1	CCR7,CXCR3,ANXA1,CCL3L3,CCRL2,LPAR1,MT-RNR2,GPR183,CX3CR1,ELMO2,CCL24,CCR2,CCL1,GAB1,CCR1,CCL3,NR4A1,IL6R,CCL23,GBF1,PIP5K1C,SFTPD,HMGB2,RAB13,TNFRSF11A,PIP5K1A,IL16,LGALS3,ARHGEF16
VACUOLE ORGANIZATION%GOBP%GO:0007033	VACUOLE ORGANIZATION%GOBP%GO:0007033	0.00041858	0.0134695	1.75638	1	ABCA1,ZKSCAN3,ATG14,TP53INP2,WIPI2,GABARAPL1,ATG13,TMEM41B,AKTIP,GABARAP,ARSB,ATP6AP2,WDR45B,RAB23,SNAPIN,RAB14,FAM160A2,GRN,RAB1A,BECN1,RAB20,ATG9A,AMBRA1,TPP1,WIPI1,VPS18,RAB1B,GABARAPL2,TP53INP1,WDR45,TPCN2,UBXN2A,VMP1,LAPTM5,HPS4,PIKFYVE,GAA,ATG2A,UBQLN2,TRAPPC8,HPS1,UBQLN1
IMMUNE RESPONSE-REGULATING SIGNALING PATHWAY%GOBP%GO:0002764	IMMUNE RESPONSE-REGULATING SIGNALING PATHWAY%GOBP%GO:0002764	0.000423828	0.0135547	1.46847	1	FCER1A,MICB,MYO1C,HLA-DQB1,HLA-DQA1,TNFAIP3,HLA-DRA,IRAK2,HLA-DPA1,BCL10,CRK,CDC42,CMKLR1,TRAF6,HLA-DRB1,CD4,HLA-DRB5,PIK3R4,TAB2,ELMO2,FCGR2A,RELB,TICAM1,CD40,FCGR2B,RIPK1,CALM1,NCK1,FADD,WIPF2,BTRC,TIFA,BAIAP2,TIRAP,PLEKHA1,SH2B2,CD38,BIRC3,SRC,MAPK1,NFATC1,TYROBP,IRF7,RAC1,PDPK1,PSMD5,TANK,LILRA2,TLR6,DDX58,TLR4,OTULIN,C5AR2,HLA-DPB1,WASF2,ACTR2,RPS6KA5,MAPKAPK2,SFTPD,TLR7,RC3H2,CLEC10A,ICAM2,…
REGULATION OF ERK1 AND ERK2 CASCADE%GOBP%GO:0070372	REGULATION OF ERK1 AND ERK2 CASCADE%GOBP%GO:0070372	0.000441185	0.0140238	1.63173	1	CCR7,DUSP10,FLCN,CHI3L1,CCL3L3,RRAS,CD74,GPR183,ICAM1,HLA-DRB1,CD4,SMAD4,ARHGEF5,RGS14,CCL24,CCL1,SPRY1,TIRAP,CCR1,CCL3,SLAMF1,SPRY3,CCL23,TIMP3,FAM83D,CRKL,TLR4,FGFR3,YWHAZ,SPRED2,RAP1A,TNFRSF11A,MAP2K7,NOTCH1,GBP1,ZDHHC17,LYN,MTURN,CD36,PTPN22
CARBOHYDRATE DERIVATIVE BIOSYNTHETIC PROCESS%GOBP%GO:1901137	CARBOHYDRATE DERIVATIVE BIOSYNTHETIC PROCESS%GOBP%GO:1901137	0.000449016	0.0141862	-1.52481	-1	ACOT7,HK2,CTPS1,B4GAT1,ACSL4,UAP1,ANGPT1,DHODH,GFPT1,TMEM106A,SCD5,SLC26A2,PIGX,GXYLT1,ATIC,IMPDH1,FKTN,DPY19L1,LDHA,HK1,OSTC,POFUT1,STT3B,NDST1,GMDS,FASN,GCDH,CMPK1,DUT,GALNT2,SERP1,ST3GAL4,PFAS,RFK,ALG11,CHST11,C1GALT1,ACACA,B3GNT2,NUS1,SORD,PIGF,HACD2,PIGK,GALNT14,ADAL,DPY19L2,CAD,SDF2L1,ADSL,B3GNT7,ELOVL6,IMPDH2,B3GALT6,PDHA1,TGFB1,MOGS,ACSF3,PIGQ,UBE2J1,RRM2B,XYLB,TPI1,CHST10
POSITIVE REGULATION OF LYMPHOCYTE ACTIVATION%GOBP%GO:0051251	POSITIVE REGULATION OF LYMPHOCYTE ACTIVATION%GOBP%GO:0051251	0.000460643	0.0144659	1.62829	1	TNFSF9,CCR7,ANXA1,DUSP10,HLA-DRA,TNFSF14,HLA-DPA1,MYB,CD86,TGFBR2,CDC42,CD74,GPR183,HLA-DRB1,SIRPB1,ZBTB1,TICAM1,CD40,NCK1,CCR2,FADD,TIRAP,IL18,TNFSF4,CD38,SOCS1,SRC,AXL,TYROBP,RAC1,PDPK1,TFRC,CLEC7A,HLA-DMB,HLA-DPB1,NLRP3,SOCS5,KMT5B,CD6,MAP3K8,CAV1,CD55
LYMPHOCYTE MIGRATION%GOBP%GO:0072676	LYMPHOCYTE MIGRATION%GOBP%GO:0072676	0.000479398	0.0148756	1.89012	1	CCR7,CCL3L3,GPR183,CD99,CCL24,CCR2,CCL1,CCL3,CCL23,F11R
NUCLEAR SIGNALING BY ERBB4%REACTOME DATABASE ID RELEASE 75%1251985	NUCLEAR SIGNALING BY ERBB4%REACTOME DATABASE ID RELEASE 75%1251985	0.000479104	0.0148756	1.91889	1	ADAM17,PSEN1,MXD4,TAB2,SRC,STMN1,PSENEN,S100B,NCSTN,APH1A,APH1B
REGULATION OF CELL MOTILITY%GOBP%GO:2000145	REGULATION OF CELL MOTILITY%GOBP%GO:2000145	0.000487153	0.0150268	1.41293	1	PTGER4,CCR7,MYO1C,ANXA1,DUSP10,ADAM17,SDCBP,FLCN,SORL1,CRK,S100A11,SEMA3C,RRAS,MOSPD2,CMKLR1,RNF41,CD74,GPR183,ICAM1,SGK1,ACVR1,HMOX1,PLXNC1,CX3CR1,TMEM102,SEMA4B,CARD10,PECAM1,CD40,RIN3,CD99,CCL24,CCR2,FADD,GNA12,INSR,CLIC4,CCL1,TIRAP,GAB1,CCR1,ADAM9,CCL3,CITED2,MAP3K3,DAPK2,CAMK1D,SRC,IL6R,MAPK1,FGFR1,CCSAP,DLG5,PIK3C2A,FAM89B,TRIB1,INPP5F,FOXO3,RDX,RAC1,PDPK1,MAP2K3,VCL,ARSB,CYP1B1,CLEC7A,CAMK…
GLUCOSE 6-PHOSPHATE METABOLIC PROCESS%GOBP%GO:0051156	GLUCOSE 6-PHOSPHATE METABOLIC PROCESS%GOBP%GO:0051156	0.000505855	0.0155119	-1.99549	-1	RPIA,HK2,HK1
CELLULAR CATION HOMEOSTASIS%GOBP%GO:0030003	CELLULAR CATION HOMEOSTASIS%GOBP%GO:0030003	0.000509881	0.0155439	1.51149	1	MT2A,MT1E,PTGER4,CCR7,CXCR3,SMAD3,CCRL2,LPAR1,CMKLR1,MT-RNR2,PSEN1,SLC31A2,HMOX1,SMAD4,CX3CR1,CHP1,CD40,CALM1,MYC,ATP6V1A,CAV2,CCR2,FTH1,FTL,CCL1,C19orf12,CCR1,ATP6V1D,CCL3,HEPH,GPR157,FBXL5,CCL23,SLC25A23,ATP6V0D1,TMEM178A,PDPK1,TFRC,ATP6AP2,C5AR2,MCUB,ATP6V1G1,SLC4A8,SLC9B1,ANXA6,TPT1,GHRL,GRN,CAV1,SLC40A1,LACC1,CD55,FPR1,P2RX4,NPTN,HTT,RAB20,SLC11A2,SLC24A3,MCU,TMCO1,FLVCR1,ATP6V1C1,GPR35,TRPV…
RNA LOCALIZATION%GOBP%GO:0006403	RNA LOCALIZATION%GOBP%GO:0006403	0.000522901	0.0158482	-1.73604	-1	SRSF7,FMR1,PHAX,MRPL18,XPOT,TCP1,NOP9,XPO5,HNRNPU,NUP107,CCT4,CPSF1,NOL6,MAGOHB,SRSF1,NOP58,DDX39A,XPO1,PRPF31,EXOSC2,CCT2,NUP50,NUP43,SEH1L,CPSF3,RRS1,SYMPK,BICD1,DDX39B,PIH1D1,ARC,NCBP1,ATR,NUP155,SMG7,U2AF1,THOC3,PNPT1,SRSF5,LTV1,THOC6,THOC1,MCM3AP,ABCE1,RAN,NXT1,PCID2,DKC1,DDX19A
GENOTOXICITY PATHWAY%WIKIPATHWAYS_20201210%WP4286%HOMO SAPIENS	GENOTOXICITY PATHWAY%WIKIPATHWAYS_20201210%WP4286%HOMO SAPIENS	0.000530069	0.0159725	1.81154	1	BTG2,PTGER4,CDKN1A,MDM2,HIST1H1E,BRMS1L,SERTAD1,EI24,ID2,E2F7,LRRFIP2,DCP1B,E2F8,IKBIP,PRKAB1,PPM1D,DUSP14,DDB2
REGULATION OF NEUTROPHIL MIGRATION%GOBP%GO:1902622	REGULATION OF NEUTROPHIL MIGRATION%GOBP%GO:1902622	0.000541788	0.0162319	1.94208	1	CCR7,MOSPD2,CD74,CD99,TIRAP,DAPK2,CAMK1D,RAC1,C5AR2
NEGATIVE REGULATION OF LEUKOCYTE ACTIVATION%GOBP%GO:0002695	NEGATIVE REGULATION OF LEUKOCYTE ACTIVATION%GOBP%GO:0002695	0.000558227	0.0166288	1.71999	1	LDLR,ANXA1,TNFAIP3,CD86,HAVCR2,SAMSN1,HLA-DRB1,SDC4,FCGR2B,MILR1,CCR2,TNFSF4,SOCS1,DLG5,TYROBP,CD84,IRF1,SFTPD,SOCS5,RC3H2,GRN,RC3H1,LGALS3,LYN,PTPN22,LILRB4,TNFAIP8L2,MICA
CELLULAR METAL ION HOMEOSTASIS%GOBP%GO:0006875	CELLULAR METAL ION HOMEOSTASIS%GOBP%GO:0006875	0.000582758	0.0172609	1.54713	1	MT2A,MT1E,PTGER4,CCR7,CXCR3,SMAD3,CCRL2,LPAR1,CMKLR1,MT-RNR2,PSEN1,SLC31A2,HMOX1,SMAD4,CX3CR1,CD40,CALM1,MYC,ATP6V1A,CAV2,CCR2,FTH1,FTL,CCL1,C19orf12,CCR1,CCL3,HEPH,GPR157,FBXL5,CCL23,SLC25A23,ATP6V0D1,TMEM178A,PDPK1,TFRC,C5AR2,MCUB,ATP6V1G1,ANXA6,TPT1,GHRL,CAV1,SLC40A1,CD55,FPR1,P2RX4,NPTN,HTT,SLC11A2,SLC24A3,MCU,TMCO1,FLVCR1
NUCLEOBASE-CONTAINING SMALL MOLECULE METABOLIC PROCESS%GOBP%GO:0055086	NUCLEOBASE-CONTAINING SMALL MOLECULE METABOLIC PROCESS%GOBP%GO:0055086	0.000600457	0.0176846	-1.51002	-1	ACOT7,RPIA,HK2,PPAT,CTPS1,NDUFB5,ACSL4,UAP1,DHODH,GLRX,TDG,GFPT1,SCD5,SLC26A2,NEIL2,NTHL1,UNG,ATIC,IMPDH1,MOCS2,ERH,LDHA,TXNRD1,HK1,BPNT1,REXO2,GMDS,FASN,GSR,SULT1B1,GCDH,CMPK1,DUT,NAPRT,GPD2,FAR2,PFAS,RFK,ACACA,NAMPT,TAZ,MTHFD1,SULT1A1,HACD2,ADAL,CAD,COA6,RNASEH2B,NT5M,ADSL,KCNAB2,ELOVL6,IMPDH2,PARP10,HSPA8,PDHA1,TGFB1,ACSF3,RRM2B,TPI1,NME2,PMM2,DCTPP1,ACSM3,COASY,ENTPD7,PNP,PARP16,NME1,FUT8
HALLMARK_E2F_TARGETS%MSIGDB_C2%HALLMARK_E2F_TARGETS	HALLMARK_E2F_TARGETS%MSIGDB_C2%HALLMARK_E2F_TARGETS	0.000607668	0.0176971	-1.7236	-1	ANP32E,LBR,CTPS1,EXOSC8,MCM6,TOP2A,ZW10,NOLC1,UNG,USP1,NUP107,TRA2B,CENPE,PA2G4,DUT,NOP56,DDX39A,RAD51C,HMGB3,POLA2,ILF3,PNN,EIF2S1,UBE2S,LYAR,MCM5
REGULATION OF T CELL PROLIFERATION%GOBP%GO:0042129	REGULATION OF T CELL PROLIFERATION%GOBP%GO:0042129	0.000604883	0.0176971	1.68342	1	TNFSF9,ANXA1,HLA-DPA1,CD86,TGFBR2,HLA-DRB1,SDC4,NCK1,CCR2,FADD,IL18,TNFSF4,DLG5,TFRC,TNFRSF1B,IRF1,HLA-DMB,HLA-DPB1,SFTPD,CD6,CD55,RC3H1
ION HOMEOSTASIS%GOBP%GO:0050801	ION HOMEOSTASIS%GOBP%GO:0050801	0.000634748	0.018383	1.45301	1	MT2A,MT1E,PTGER4,CCR7,CXCR3,SMAD3,ABCA1,CCRL2,LPAR1,CMKLR1,MT-RNR2,PSEN1,SLC31A2,HMOX1,SMAD4,CX3CR1,CHP1,XIAP,CD40,CALM1,MYC,ATP6V1A,CAV2,CCR2,FTH1,FTL,CCL1,C19orf12,ABCG1,CCR1,ATP6V1D,CCL3,ABCD1,HEPH,GPR157,FBXL5,SRC,CCL23,SLC25A23,ATP6V0D1,TMEM178A,PDPK1,TFRC,ATP6AP2,CNNM4,B2M,KLHL3,C5AR2,MCUB,ATP6V1G1,RCN3,SLC4A8,SLC9B1,RHAG,ANXA6,TPT1,GHRL,GRN,CAV1,SLC40A1,LACC1,CD55,FPR1,P2RX4,NPTN,HTT,RAB20…
CELLULAR RESPONSE TO TUMOR NECROSIS FACTOR%GOBP%GO:0071356	CELLULAR RESPONSE TO TUMOR NECROSIS FACTOR%GOBP%GO:0071356	0.000646031	0.0186064	1.62113	1	TNFSF9,ADAM17,TNFSF14,CHI3L1,NFKBIA,CCL3L3,TRAF6,ASAH1,CD40,RIPK1,CCL24,BAG4,CCL1,CCL3,TNFSF4,BIRC3,ZFAND6,GBP2,CCL23,NFE2L2,FOXO3,PSMD5,TANK,TNFRSF1B
RESPONSE TO INORGANIC SUBSTANCE%GOBP%GO:0010035	RESPONSE TO INORGANIC SUBSTANCE%GOBP%GO:0010035	0.000709896	0.0203334	1.56233	1	MT2A,MT1E,CCR7,NCF1,ALOX5AP,ANXA1,TNFAIP3,HP,SLC38A2,MAPK7,MTF1,HMOX1,ALG2,RIPK1,CALM1,CLIC4,PLEKHA1,ADAM9,TNFSF4,NSMCE3,HBB,PAM,MAPK1,NFE2L2,IQGAP1,CYP1B1,HVCN1,PDCD10,CPNE8,SMPD1,PPP2CB,MEF2A,B2M,THBS1,DMTN
METAL ION HOMEOSTASIS%GOBP%GO:0055065	METAL ION HOMEOSTASIS%GOBP%GO:0055065	0.000720892	0.020424	1.50361	1	MT2A,MT1E,PTGER4,CCR7,CXCR3,SMAD3,CCRL2,LPAR1,CMKLR1,MT-RNR2,PSEN1,SLC31A2,HMOX1,SMAD4,CX3CR1,XIAP,CD40,CALM1,MYC,ATP6V1A,CAV2,CCR2,FTH1,FTL,CCL1,C19orf12,CCR1,CCL3,HEPH,GPR157,FBXL5,CCL23,SLC25A23,ATP6V0D1,TMEM178A,PDPK1,TFRC,CNNM4,B2M,C5AR2,MCUB,ATP6V1G1,ANXA6,TPT1,GHRL,CAV1,SLC40A1,CD55,FPR1,P2RX4,NPTN,HTT,SLC11A2,COX11,SLC24A3,MCU,TMCO1,FLVCR1
RESPONSE TO TUMOR NECROSIS FACTOR%GOBP%GO:0034612	RESPONSE TO TUMOR NECROSIS FACTOR%GOBP%GO:0034612	0.000719145	0.020424	1.58394	1	TNFSF9,ADAM17,TNFSF14,CHI3L1,NFKBIA,CCL3L3,TRAF6,ASAH1,CD40,RIPK1,CCL24,BAG4,CCL1,ADAM9,CCL3,TNFSF4,BIRC3,ZFAND6,GBP2,CCL23,IGBP1,NFE2L2,FOXO3,PSMD5,TANK,SMPD1,TNFRSF1B
ALLOGRAFT REJECTION%WIKIPATHWAYS_20201210%WP2328%HOMO SAPIENS	ALLOGRAFT REJECTION%WIKIPATHWAYS_20201210%WP2328%HOMO SAPIENS	0.000744376	0.0208625	1.8431	1	HLA-DQB1,HLA-DQA1,HLA-DRA,HLA-DPA1,HLA-DRB1,HLA-DMA,HLA-DRB5,CD40,ABCB1,HLA-DMB,HLA-DOA,HLA-DPB1
T CELL ACTIVATION%GOBP%GO:0042110	T CELL ACTIVATION%GOBP%GO:0042110	0.000741474	0.0208625	1.65371	1	PTGER4,CCR7,MICB,ANXA1,ADAM17,TNFSF14,CD74,GPR183,ICAM1,CD4,ADA,SOX13,LFNG,NCK1,FADD,TNFSF4
POSITIVE REGULATION OF MYELOID LEUKOCYTE DIFFERENTIATION%GOBP%GO:0002763	POSITIVE REGULATION OF MYELOID LEUKOCYTE DIFFERENTIATION%GOBP%GO:0002763	0.000759407	0.0210718	1.85211	1	CD74,TRAF6,HLA-DRB1,CD4,RIPK1,FADD,EVI2B,CCR1,CTNNBIP1,TYROBP
SIGNAL TRANSDUCTION INVOLVED IN MITOTIC CELL CYCLE CHECKPOINT%GOBP%GO:0072413	SIGNAL TRANSDUCTION INVOLVED IN MITOTIC CELL CYCLE CHECKPOINT%GOBP%GO:0072413	0.000759928	0.0210718	1.75566	1	BTG2,CDKN1A,MDM2,CNOT4,ARID3A,CDK1,E2F7,CNOT8,CDC25C,E2F8
AUTOPHAGOSOME ORGANIZATION%GOBP%GO:1905037	AUTOPHAGOSOME ORGANIZATION%GOBP%GO:1905037	0.000766004	0.0211279	1.77071	1	ATG14,TP53INP2,WIPI2,GABARAPL1,ATG13,TMEM41B,GABARAP,WDR45B,RAB23,RAB1A,BECN1,ATG9A,AMBRA1,WIPI1,RAB1B,GABARAPL2,TP53INP1,WDR45,UBXN2A,VMP1,ATG2A,UBQLN2,TRAPPC8,UBQLN1
REGULATION OF LYMPHOCYTE PROLIFERATION%GOBP%GO:0050670	REGULATION OF LYMPHOCYTE PROLIFERATION%GOBP%GO:0050670	0.00079865	0.0217977	1.64561	1	TNFSF9,ANXA1,HLA-DPA1,CD86,TGFBR2,CD74,GPR183,HLA-DRB1,SDC4,CD40,FCGR2B,NCK1,CCR2,FADD,TIRAP,IL18,TNFSF4,CD38,DLG5,TYROBP,TFRC,TNFRSF1B,IRF1,HLA-DMB,HLA-DPB1,SFTPD,CD6,CD55,RC3H1
REGULATION OF MONONUCLEAR CELL PROLIFERATION%GOBP%GO:0032944	REGULATION OF MONONUCLEAR CELL PROLIFERATION%GOBP%GO:0032944	0.00079865	0.0217977	1.64561	1	TNFSF9,ANXA1,HLA-DPA1,CD86,TGFBR2,CD74,GPR183,HLA-DRB1,SDC4,CD40,FCGR2B,NCK1,CCR2,FADD,TIRAP,IL18,TNFSF4,CD38,DLG5,TYROBP,TFRC,TNFRSF1B,IRF1,HLA-DMB,HLA-DPB1,SFTPD,CD6,CD55,RC3H1
ENDOTHELIAL CELL DIFFERENTIATION%GOBP%GO:0045446	ENDOTHELIAL CELL DIFFERENTIATION%GOBP%GO:0045446	0.00081944	0.0222486	1.80785	1	ICAM1,ACVR1,SMAD4,PPP1R16B,PECAM1,KDM6B,RDX,RAP1B,F11R,RAP2C,SCUBE1,RAPGEF1,RAP1A,RAB1A,MYADM,NOTCH1,ACVR2B,PDE4D,RAB1B,RAP2B,DLL1,EZR,RAPGEF2
INORGANIC ION HOMEOSTASIS%GOBP%GO:0098771	INORGANIC ION HOMEOSTASIS%GOBP%GO:0098771	0.000836424	0.0223604	1.46956	1	MT2A,MT1E,PTGER4,CCR7,CXCR3,SMAD3,CCRL2,LPAR1,CMKLR1,MT-RNR2,PSEN1,SLC31A2,HMOX1,SMAD4,CX3CR1,CHP1,XIAP,CD40,CALM1,MYC,ATP6V1A,CAV2,CCR2,FTH1,FTL,CCL1,C19orf12,CCR1,ATP6V1D,CCL3,HEPH,GPR157,FBXL5,CCL23,SLC25A23,ATP6V0D1,TMEM178A,PDPK1,TFRC,ATP6AP2,CNNM4,B2M,C5AR2,MCUB,ATP6V1G1,SLC4A8,SLC9B1,ANXA6,TPT1,GHRL,GRN,CAV1,SLC40A1,LACC1,CD55,FPR1,P2RX4,NPTN,HTT,RAB20,SLC11A2,COX11,SLC24A3,MCU,TMCO1,FLVCR…
REGULATION OF CHEMOTAXIS%GOBP%GO:0050920	REGULATION OF CHEMOTAXIS%GOBP%GO:0050920	0.000829619	0.0223604	1.65954	1	CCR7,ADAM17,STX3,SEMA3C,MOSPD2,CMKLR1,CD74,GPR183,SEMA4B,RIN3,CCR2,CCL1,TIRAP,CCR1,CCL3,DAPK2,CAMK1D,IL6R,MAPK1,FGFR1,RAC1
TCR SIGNALING%REACTOME%R-HSA-202403.5	TCR SIGNALING%REACTOME%R-HSA-202403.5	0.000835445	0.0223604	1.66921	1	HLA-DQB1,HLA-DQA1,HLA-DRA,HLA-DPA1,BCL10,NFKBIA,TRAF6,HLA-DRB1,CD4,HLA-DRB5,CD101,TAB2,NCK1,BTRC,PDPK1,PSMD5
CONSTITUTIVE SIGNALING BY AKT1 E17K IN CANCER%REACTOME DATABASE ID RELEASE 75%5674400	CONSTITUTIVE SIGNALING BY AKT1 E17K IN CANCER%REACTOME DATABASE ID RELEASE 75%5674400	0.000843266	0.0224283	1.84457	1	CDKN1A,MDM2,NR4A1,FOXO3,PDPK1,RICTOR
CATION HOMEOSTASIS%GOBP%GO:0055080	CATION HOMEOSTASIS%GOBP%GO:0055080	0.000849595	0.0224819	1.46852	1	MT2A,MT1E,PTGER4,CCR7,CXCR3,SMAD3,CCRL2,LPAR1,CMKLR1,MT-RNR2,PSEN1,SLC31A2,HMOX1,SMAD4,CX3CR1,CHP1,XIAP,CD40,CALM1,MYC,ATP6V1A,CAV2,CCR2,FTH1,FTL,CCL1,C19orf12,CCR1,ATP6V1D,CCL3,HEPH,GPR157,FBXL5,CCL23,SLC25A23,ATP6V0D1,TMEM178A,PDPK1,TFRC,ATP6AP2,CNNM4,B2M,C5AR2,MCUB,ATP6V1G1,SLC4A8,SLC9B1,ANXA6,TPT1,GHRL,GRN,CAV1,SLC40A1,LACC1,CD55,FPR1,P2RX4,NPTN,HTT,RAB20,SLC11A2,COX11,SLC24A3,MCU,TMCO1,FLVCR…
MACROAUTOPHAGY%REACTOME%R-HSA-1632852.8	MACROAUTOPHAGY%REACTOME%R-HSA-1632852.8	0.000874825	0.0230326	1.66749	1	RRAGC,SQSTM1,DYNC1LI2,ULK1,ATG14,WIPI2,PIK3R4,ATG4D,CHMP3,TSC1,GABARAPL1,ATG13,CHMP2B,RRAGD,MTERF3,GABARAP,WDR45B,ARL13B,DYNC1H1,LAMTOR3,PRKAB1,MFN1,MTMR3,PLIN3,BECN1,ATG9A,AMBRA1,WIPI1
IMMUNE RESPONSE-ACTIVATING CELL SURFACE RECEPTOR SIGNALING PATHWAY%GOBP%GO:0002429	IMMUNE RESPONSE-ACTIVATING CELL SURFACE RECEPTOR SIGNALING PATHWAY%GOBP%GO:0002429	0.000883557	0.0231456	1.49008	1	MICB,MYO1C,HLA-DQB1,HLA-DQA1,HLA-DRA,HLA-DPA1,BCL10,CRK,CDC42,CMKLR1,TRAF6,HLA-DRB1,CD4,HLA-DRB5,TAB2,ELMO2,FCGR2A,RELB,FCGR2B,NCK1,WIPF2,BTRC,BAIAP2,PLEKHA1,SH2B2,CD38,SRC,MAPK1,TYROBP,RAC1,PDPK1,PSMD5,LILRA2,C5AR2,HLA-DPB1,WASF2,ACTR2,RPS6KA5,RC3H2,CLEC10A,ICAM2,FPR1,ARPC2,RC3H1,PSMD11
GLYCOSPHINGOLIPID METABOLISM%REACTOME%R-HSA-1660662.5	GLYCOSPHINGOLIPID METABOLISM%REACTOME%R-HSA-1660662.5	0.000894798	0.0233229	1.8573	1	ASAH1,PSAP,GM2A,UGCG,CTSA,ARSB,HEXB,SMPD1,SUMF1,CERK,GALC,NEU1,ESYT2,ARSA,CPTP
CHEMICAL HOMEOSTASIS%GOBP%GO:0048878	CHEMICAL HOMEOSTASIS%GOBP%GO:0048878	0.00093407	0.0242254	1.35535	1	MT2A,MT1E,PTGER4,CCR7,LDLR,CXCR3,SMAD3,NPC2,DYNLT1,NR1H2,ABCA1,CCRL2,LPAR1,CMKLR1,MT-RNR2,PSEN1,SLC31A2,STAU1,HMOX1,SMAD4,CX3CR1,CHP1,XIAP,CD40,CALM1,MYC,ATP6V1A,ABHD4,CAV2,CCR2,FTH1,UGCG,INSR,FTL,CCL1,C19orf12,LDLRAP1,IL18,ABCG1,CCR1,ATP6V1D,CCL3,ABCD1,HEPH,GPR157,FBXL5,SRC,CCL23,SLC25A23,ATP6V0D1,TBC1D20,TMEM178A,STMN1,PDPK1,TFRC,ATP6AP2,CNNM4,RAB11B,B2M,KLHL3,C5AR2,GRAMD1B,RAB11A,CRTC2,MCUB,AT…
ENZYME LINKED RECEPTOR PROTEIN SIGNALING PATHWAY%GOBP%GO:0007167	ENZYME LINKED RECEPTOR PROTEIN SIGNALING PATHWAY%GOBP%GO:0007167	0.0010469	0.0270173	1.38854	1	GFRA2,MYO1C,NCF1,SLA,SMAD3,ADAM17,SDCBP,REPS2,CRK,TGFBR2,CDC42,PSEN1,EFNA4,SHCBP1,RNF111,BTBD11,ACVR1,CD4,SMAD4,RGS14,ELMO2,EIF2AK3,C2CD5,PDCD4,RHOQ,LPXN,ATP6V1A,CAV2,ADRB2,NCK1,INSR,GALNT3,BAIAP2,GAB1,CBL,ADAM9,ATP6V1D,CITED2,SH2B2,MTSS1,SRC,MAPK1,AXL,FGFR1,ATP6V0D1,NCF2,PIK3C2A,BCAR3,RAC1,STMN1,PDPK1,IQGAP1,F11R,ZFYVE16,FLRT3,RBFOX2,TGFBR1,DDIT4,SMAD5,RASGRP4,WASF2,ACTR2,SMURF2,RPS6KA5,MAPK14,G…
NUCLEOTIDE METABOLIC PROCESS%GOBP%GO:0009117	NUCLEOTIDE METABOLIC PROCESS%GOBP%GO:0009117	0.00106655	0.0273888	-1.51156	-1	ACOT7,RPIA,HK2,PPAT,CTPS1,NDUFB5,ACSL4,DHODH,TDG,SCD5,SLC26A2,NEIL2,NTHL1,UNG,ATIC,IMPDH1,MOCS2,LDHA,HK1,BPNT1,REXO2,FASN,SULT1B1,GCDH,CMPK1,DUT,NAPRT,GPD2,FAR2,PFAS,RFK,ACACA,NAMPT,TAZ,MTHFD1,SULT1A1,HACD2,CAD,COA6,RNASEH2B,NT5M,ADSL,KCNAB2,ELOVL6,IMPDH2,PARP10,HSPA8,PDHA1,TGFB1,ACSF3
DOWNSTREAM TCR SIGNALING%REACTOME%R-HSA-202424.4	DOWNSTREAM TCR SIGNALING%REACTOME%R-HSA-202424.4	0.00107531	0.0274783	1.68056	1	HLA-DQB1,HLA-DQA1,HLA-DRA,HLA-DPA1,BCL10,NFKBIA,TRAF6,HLA-DRB1,CD4,HLA-DRB5,TAB2,BTRC,PDPK1,PSMD5
HALLMARK_TGF_BETA_SIGNALING%MSIGDB_C2%HALLMARK_TGF_BETA_SIGNALING	HALLMARK_TGF_BETA_SIGNALING%MSIGDB_C2%HALLMARK_TGF_BETA_SIGNALING	0.00111431	0.028336	1.81394	1	CDKN1C,CTNNB1,ACVR1,ID2,IFNGR2,JUNB,TGFBR1,THBS1,SMURF2,SKI,WWTR1,APC,SMAD6,ARID4B,FKBP1A,SKIL,MAP3K7,HIPK2,RAB31
MACROAUTOPHAGY%GOBP%GO:0016236	MACROAUTOPHAGY%GOBP%GO:0016236	0.00112233	0.0284014	1.59129	1	ZFYVE1,ACBD5,SQSTM1,ULK1,ATG14,TP53INP2,WIPI2,PIK3R4,EI24,LAMP2,CHMP3,GABARAPL1,ATG13,VPS37A,TMEM41B,SRC,CHMP2B,MTERF3,GABARAP,WDR45B,KLHL3,PRKAB1,RAB23,MFN1,MTMR3,CALCOCO2,STAM,RAB1A,BECN1,STAM2,ATG9A,AMBRA1,WIPI1,PLAA,RAB1B,GABARAPL2,TP53INP1,SNAP29,UBXN6,WDR45
REGULATION OF GROWTH%GOBP%GO:0040008	REGULATION OF GROWTH%GOBP%GO:0040008	0.00113033	0.0284657	1.44947	1	MT2A,MT1E,CDKN1A,DUSP10,SMAD3,SERTAD3,ADAM17,SDCBP,FLCN,SEMA3C,CDC42,LRP12,AGR2,CTTN,SGK1,SMAD4,SEMA4B,RNF6,EI24,CISH,SESN2,INSR,VGLL4,PAK4,ADNP2,HSPA1B,MTPN,SERTAD2,LATS1,IP6K2,PRDM11,TFRC,ING4,SGK3
NEGATIVE REGULATION OF CELL DIFFERENTIATION%GOBP%GO:0045596	NEGATIVE REGULATION OF CELL DIFFERENTIATION%GOBP%GO:0045596	0.00114064	0.0285874	1.4684	1	LDLR,ANXA1,SMAD3,FLCN,DYNLT1,SORL1,NR1H2,ABCA1,SEMA3C,NFKBIA,LPAR1,SMAD4,SEMA4B,RNF6,TRIB2,BBS12,FCGR2B,PDCD4,MYC,ID2,SPRY1,ABCG1,ARNTL,CCL3,TNFSF4,SOCS1,SPRY3,NFATC1,INPP5F,TMEM178A,IRF1,TLR4,SUFU,TGFBR1,B2M,ZFP36L2,PRICKLE1,DMTN,GPR137B,SKI,GATA2,FOXA2,SOCS5,RC3H2,METTL14,WWTR1,SPRED2,ADIPOR1,CAV1,EFNB2,SRGAP2C,RC3H1,NOTCH1,LILRB3,GBP1,EFNA1,E2F1,HDAC3,USF3,SMAD6,CTR9,LDB1,RB1,SUZ12,CBFA2T2,DEN…
NUCLEOSIDE PHOSPHATE METABOLIC PROCESS%GOBP%GO:0006753	NUCLEOSIDE PHOSPHATE METABOLIC PROCESS%GOBP%GO:0006753	0.00115955	0.028648	-1.49481	-1	ACOT7,RPIA,HK2,PPAT,CTPS1,NDUFB5,ACSL4,DHODH,TDG,SCD5,SLC26A2,NEIL2,NTHL1,UNG,ATIC,IMPDH1,MOCS2,LDHA,HK1,BPNT1,REXO2,FASN,SULT1B1,GCDH,CMPK1,DUT,NAPRT,GPD2,FAR2,PFAS,RFK,ACACA,NAMPT,TAZ,MTHFD1,SULT1A1,HACD2,CAD,COA6,RNASEH2B,NT5M,ADSL,KCNAB2,ELOVL6,IMPDH2,PARP10,HSPA8,PDHA1,TGFB1,ACSF3
REGULATION OF LIPID LOCALIZATION%GOBP%GO:1905952	REGULATION OF LIPID LOCALIZATION%GOBP%GO:1905952	0.00115509	0.028648	1.68657	1	ANXA2,SPP1,NR1H2,ABCA1,EEPD1,NFKBIA,C3,ACSL1,DBI,LDLRAP1,ABCG1,ALKBH7,THBS1,SREBF2,GHRL,PLIN3,CAV1,TNFRSF11A,PPARD,P2RX4
TRNA METABOLIC PROCESS%GOBP%GO:0006399	TRNA METABOLIC PROCESS%GOBP%GO:0006399	0.00115486	0.028648	-1.73521	-1	THUMPD1,EXOSC8,FAM98B,EEF1E1,CTU2,TRIT1,DUS2,LARS2,AARS2,CPSF1,TRMT61A,PUS1,TRMT1,FARSA,POP5,METTL1,TARBP1,RPP25,PPA2,NSUN6,GTF3C1,NARS2,ANKRD16,DARS2,EXOSC2,CARS2,TRMU,QTRT1,FTSJ1,RPP25L,ELAC2,AIMP1,ADAT2,DPH3,DTD2,FARSB,FARS2,NSUN2,ZBTB8OS,CDKAL1,EXOSC7,TSEN54,TYW1,RPP40,MTFMT,OSGEP,METTL2B,GTF3C5,TSEN2,POP4,PPA1
EPITHELIUM DEVELOPMENT%GOBP%GO:0060429	EPITHELIUM DEVELOPMENT%GOBP%GO:0060429	0.00117975	0.0290096	1.44471	1	ITGA5,ANXA1,ADAM17,TXNIP,BCL10,TGFBR2,CDC42,PPP2R3A,ICAM1,CTNNB1,ACVR1,TOLLIP,SMAD4,ASAH1,PPP1R16B,CDK1,PECAM1,PSAP,LFNG,MYC,ID2,E2F7,ARHGAP12,UGCG,CLIC4,KRT17,CDH2,ADAM9,KDM6B,CITED2,MTSS1,SRC,LATS1,RDX,RAP1B,IQGAP1,VCL,E2F8,ATP6AP2,F11R,PDCD10,RAP2C,ARL13B,FLRT3,BBS4,KANK2,ERRFI1,KLHL3,STIL,DAG1,PRICKLE1,LUZP1,RCN3,PHACTR4,SCUBE1,SKI,RAPGEF1,MPP5,KDM2B,RAB13,RAP1A,RHOC,KRT8,RAB1A,DHRS9,MYADM,NO…
AUTOPHAGY%GOBP%GO:0006914	AUTOPHAGY%GOBP%GO:0006914	0.00119619	0.0290683	1.58927	1	ZFYVE1,ACBD5,SQSTM1,ULK1,ATG14,TP53INP2,WIPI2,PIK3R4,EI24,LAMP2,CHMP3,C19orf12,GABARAPL1,ATG13,VPS37A,NRBF2,TMEM41B,SRC,CHMP2B,MTERF3,GABARAP,WDR45B,KLHL3,PRKAB1,RAB23,MFN1,MTMR3,CALCOCO2,CISD2,STAM,RAB1A,BECN1,STAM2,ATG9A,AMBRA1,WIPI1,PLAA,VPS39,RAB1B,MARK2,GABARAPL2,TP53INP1,SNAP29,UBXN6,WDR45
CXCR4%IOB%CXCR4	CXCR4%IOB%CXCR4	0.00120221	0.0290683	1.68037	1	SOCS3,CRK,NFKBIA,CDC42,CTNNB1,SDC4,NCK1,CBL,SOCS1,SRC,MAPK1,FOXO3,RAC1,MAP2K3,GNA13,CRKL
HALLMARK_ALLOGRAFT_REJECTION%MSIGDB_C2%HALLMARK_ALLOGRAFT_REJECTION	HALLMARK_ALLOGRAFT_REJECTION%MSIGDB_C2%HALLMARK_ALLOGRAFT_REJECTION	0.00120444	0.0290683	1.63641	1	CXCR3,HLA-DQA1,HLA-DRA,BCL10,IFNAR2,CD74,HLA-DMA,CD40,FCGR2B,NCK1,CCR2,IFNGR2,IL18,CCR1,SOCS1,GBP2,IRF7,SRGN,HLA-DMB,HLA-DOA,B2M,NLRP3,TAPBP,SOCS5,CD2,IRF4,IL16,STAT4,LYN
PROCESS UTILIZING AUTOPHAGIC MECHANISM%GOBP%GO:0061919	PROCESS UTILIZING AUTOPHAGIC MECHANISM%GOBP%GO:0061919	0.00119619	0.0290683	1.58927	1	ZFYVE1,ACBD5,SQSTM1,ULK1,ATG14,TP53INP2,WIPI2,PIK3R4,EI24,LAMP2,CHMP3,C19orf12,GABARAPL1,ATG13,VPS37A,NRBF2,TMEM41B,SRC,CHMP2B,MTERF3,GABARAP,WDR45B,KLHL3,PRKAB1,RAB23,MFN1,MTMR3,CALCOCO2,CISD2,STAM,RAB1A,BECN1,STAM2,ATG9A,AMBRA1,WIPI1,PLAA,VPS39,RAB1B,MARK2,GABARAPL2,TP53INP1,SNAP29,UBXN6,WDR45
NUCLEOBASE-CONTAINING SMALL MOLECULE BIOSYNTHETIC PROCESS%GOBP%GO:0034404	NUCLEOBASE-CONTAINING SMALL MOLECULE BIOSYNTHETIC PROCESS%GOBP%GO:0034404	0.00122056	0.0293216	-1.77644	-1	ACOT7,HK2,CTPS1,DHODH,TDG,NEIL2,NTHL1,UNG,IMPDH1,LDHA,HK1,CMPK1,DUT
PROTEIN FOLDING%GOBP%GO:0006457	PROTEIN FOLDING%GOBP%GO:0006457	0.0013106	0.0312461	-1.67472	-1	HSPE1,MLEC,FKBP4,TCP1,ENGASE,GNB4,SACS,CLGN,CHORDC1,GNB3,FKBP5,CCT4,FKBP9,BAG3,AHSA1,DFFA,NUDCD3,DNAJC21,ERP27,NGLY1,PFDN6,HSPA5,NUDCD2,TBCA,SDF2L1,CCT2,NUDC,BAG1,SPHK1,HSPA8,CCT7,MOGS,DNAJC3,CCT6A,DNAJC10,RUVBL2
TCR%NETPATH%TCR	TCR%NETPATH%TCR	0.00131266	0.0312461	1.52186	1	ANXA2,BMF,SLA,SDCBP,DYRK1B,BCL10,CRK,NFKBIA,ATF2,CDC42,MAPK7,TRAF6,CTNNB1,DNAJB1,ADA,PECAM1,CISH,GOLGA5,LPXN,NCK1,CBL,ADAM9,SOS2,SRC,MAPK1,NFATC1,PTTG1IP,GIT2,CD84,CRKL,WASF2,RPS6KA5,MAPK14,PIK3C2B,RAPGEF1,YWHAZ
POSITIVE REGULATION OF ALPHA-BETA T CELL DIFFERENTIATION%GOBP%GO:0046638	POSITIVE REGULATION OF ALPHA-BETA T CELL DIFFERENTIATION%GOBP%GO:0046638	0.00131949	0.0312659	1.84103	1	ANXA1,HLA-DRA,MYB,CD86,TGFBR2,HLA-DRB1,IL18,TNFSF4,SOCS1,NLRP3,SOCS5
NUCLEAR EXPORT%GOBP%GO:0051168	NUCLEAR EXPORT%GOBP%GO:0051168	0.00138168	0.0325915	-1.67968	-1	SRSF7,PHAX,XPOT,ANKLE1,RITA1,NOP9,XPO5,NUP107,DESI1,CPSF1,NOL6,MAGOHB,SRSF1,DDX39A,XPO6,XPO1,XPO4,NUP50,NUP43,SEH1L,CPSF3,TGFB1,RRS1,SYMPK,DDX39B,NCBP1,NUP155,NEMF,SMG7,U2AF1,THOC3,SRSF5,LTV1,THOC6,THOC1,MCM3AP,ABCE1,RAN,NXT1,PCID2,CCHCR1,DDX19A,RANBP17,DHX38,SRSF3,NUP210,STRADB
NEGATIVE REGULATION OF CELL ACTIVATION%GOBP%GO:0050866	NEGATIVE REGULATION OF CELL ACTIVATION%GOBP%GO:0050866	0.00141723	0.0332794	1.6708	1	LDLR,ANXA1,TNFAIP3,CD86,HAVCR2,THBD,SAMSN1,HLA-DRB1,SDC4,FCGR2B,MILR1,CCR2,TNFSF4,SOCS1,DLG5,TYROBP,CD84,IRF1,SFTPD,SOCS5,RC3H2,GRN,RC3H1
EBOLA VIRUS PATHWAY ON HOST%WIKIPATHWAYS_20201210%WP4217%HOMO SAPIENS	EBOLA VIRUS PATHWAY ON HOST%WIKIPATHWAYS_20201210%WP4217%HOMO SAPIENS	0.00145633	0.034044	1.66661	1	HLA-DQB1,HLA-DQA1,ADAM17,HLA-DRA,SOCS3,HLA-DPA1,NPC2,HAVCR2,CDC42,HLA-DRB1,HLA-DMA,HLA-DRB5,RELB,RAB5A,CAV2,MAPK1,AXL,IRF7,RAC1,RAB9A,HLA-DMB,DDX58,TLR4,NFKB2,HLA-DOA,HLA-DPB1
INTERLEUKIN-10 SIGNALING%REACTOME%R-HSA-6783783.3	INTERLEUKIN-10 SIGNALING%REACTOME%R-HSA-6783783.3	0.00146484	0.0340903	1.784	1	CD86,CCL3L3,IL1RN,IL10RA,ICAM1,CCR2,IL18,CCR1,CCL3,TNFRSF1B,PTGS2
REGULATION OF INTERLEUKIN-2 PRODUCTION%GOBP%GO:0032663	REGULATION OF INTERLEUKIN-2 PRODUCTION%GOBP%GO:0032663	0.00147245	0.0341151	1.80114	1	ANXA1,TNFAIP3,CD86,HAVCR2,TRAF6,CD4,CCR2,CLEC7A,SFTPD,GBP1,IRF4,CARD11,PDE4D,LILRB4,MAP3K7,TRIM27,EZR,ZFP36,PRNP,LAPTM5,RPS3,PDE4B,KAT5
REGULATION OF COLD-INDUCED THERMOGENESIS%GOBP%GO:0120161	REGULATION OF COLD-INDUCED THERMOGENESIS%GOBP%GO:0120161	0.00152326	0.0351204	1.62604	1	ADAM17,FLCN,ARRDC3,NR1H2,IP6K1,CMKLR1,ACSL1,KDM3A,ADRB2,CCR2,IL18,ARNTL,KDM6B,PLCL2,DYNC1H1,TLR4,PRKAB1,GHRL,ADIPOR1,CAV1,ADIPOR2,APC,GNAS,NOTCH1,ACVR2B,IRF4,SLC25A44,IGF1R,HDAC3,TFE3,RB1,CD36,LPIN1
REGULATION OF NEUTROPHIL CHEMOTAXIS%GOBP%GO:0090022	REGULATION OF NEUTROPHIL CHEMOTAXIS%GOBP%GO:0090022	0.00152932	0.0351204	1.8151	1	CCR7,MOSPD2,CD74,TIRAP,DAPK2,CAMK1D,RAC1,C5AR2,MCU
ALPHA-BETA T CELL DIFFERENTIATION%GOBP%GO:0046632	ALPHA-BETA T CELL DIFFERENTIATION%GOBP%GO:0046632	0.00157489	0.0355454	1.84456	1	PTGER4,ANXA1,GPR183,IRF4
AMYLOID PRECURSOR PROTEIN METABOLIC PROCESS%GOBP%GO:0042982	AMYLOID PRECURSOR PROTEIN METABOLIC PROCESS%GOBP%GO:0042982	0.00157826	0.0355454	1.84077	1	ADAM17,PSEN1,LDLRAP1,ABCG1,ADAM19,PSENEN,NCSTN,APH1A,APH1B,TMCC2
ANTIGEN PROCESSING AND PRESENTATION OF EXOGENOUS PEPTIDE ANTIGEN%GOBP%GO:0002478	ANTIGEN PROCESSING AND PRESENTATION OF EXOGENOUS PEPTIDE ANTIGEN%GOBP%GO:0002478	0.00155735	0.0355454	1.52941	1	NCF1,HLA-DQB1,HLA-DQA1,VAMP3,HLA-DRA,HLA-DPA1,DYNC1LI2,CD74,SEC24B,HLA-DRB1,HLA-DMA,HLA-DRB5,FCGR2B,NCF2,PSMD5,CAPZA1,HLA-DMB,KIF18A,DYNC1H1,HLA-DOA,B2M,HLA-DPB1,KIF23,TAPBP,PSMD11,SEC23A,AP1G1,DCTN6,DCTN2,AP1S3,KIF2C,CAPZB,RACGAP1,ITGB5,CLTA,CYBB,CD36
CELLULAR RESPONSE TO EXTERNAL STIMULUS%GOBP%GO:0071496	CELLULAR RESPONSE TO EXTERNAL STIMULUS%GOBP%GO:0071496	0.00157361	0.0355454	1.52453	1	PTGER4,ZFYVE1,CDKN1A,FLCN,TNFSF14,RRAGC,NR4A2,BCL10,SESN1,ULK1,NUDT15,ATG14,WIPI2,FNIP1,PIK3R4,EIF2AK3,CD40,LAMP2,FADD,SESN2,TSC1,GABARAPL1,MAPK1,TNFRSF10B,RRAGD,FOXO3,GABARAP,F11R,WDR45B,IRF1,TLR4,NUAK2,MTMR3,SSH1,TLR7,FOXA2,SREBF2,FAS,MAP3K2,BECN1,P2RX4
SIGNALING BY GPCR%REACTOME DATABASE ID RELEASE 75%372790	SIGNALING BY GPCR%REACTOME DATABASE ID RELEASE 75%372790	0.00158192	0.0355454	1.38642	1	PTGER4,CCR7,LDLR,CXCR3,ANXA1,S1PR2,C3,CCL3L3,CCRL2,CDC42,LPAR1,CMKLR1,MT-RNR2,LRP12,GPR183,RGS2,MAPK7,RGS1,CX3CR1,ARHGEF5,RGS14,SDC4,ADGRE5,FZD2,PSAP,CALM1,ADRB2,CCR2,GNA12,CCL1,KPNA2,CCR1,CCL3,SOS2,SRC,MAPK1,DHRS3,PDPK1,ARHGEF3,CAMK2A,GNB5,CALCRL,GNG7,CNR2,GNA13,RTP4,CAMK2G,PPP2CB,C5AR2,PLA2G4A,PDE3B,ADORA3,GNG5,ARHGEF7,GNG2,GPC1,ECT2,FGD4,GNAI3,RHOC,ADGRE1,CD55,FPR1,FZD4,DHRS9,GNAS,NAPEPLD,RGS1…
POSITIVE REGULATION OF LIPID METABOLIC PROCESS%GOBP%GO:0045834	POSITIVE REGULATION OF LIPID METABOLIC PROCESS%GOBP%GO:0045834	0.00160902	0.0359991	1.66159	1	CCR7,LDLR,ANXA1,CNEP1R1,NR1H2,CD74,ATG14,CHP1,PIK3R4,LDLRAP1,ABCG1,ABCD1,PTGS2,FGFR3,SORBS1,FLT3,PPARD,AMBRA1,ELOVL5
COFACTOR BIOSYNTHETIC PROCESS%GOBP%GO:0051188	COFACTOR BIOSYNTHETIC PROCESS%GOBP%GO:0051188	0.00161668	0.0360159	-1.6371	-1	ACOT7,HK2,ACSL4,SCD5,GGCT,MOCS2,RSAD1,MAT2A,LDHA,HK1,HAGH,COQ2,FASN,GCDH,UBIAD1,NAPRT,RFK,ACACA,NAMPT,MTHFD1,LIAS,HACD2,QDPR,UROD,ELOVL6,PARP10,PDHA1,ACSF3,TPI1,HMBS,CNDP2,COASY,PARP16,GCLC,PDSS1,NNMT,COQ10B,GAPDH,PKM,SPR,NADK,PFKL,ACSS1,HAAO,CPOX,PFKM,ENO1,ENO3,ALDOA
PURINE-CONTAINING COMPOUND BIOSYNTHETIC PROCESS%GOBP%GO:0072522	PURINE-CONTAINING COMPOUND BIOSYNTHETIC PROCESS%GOBP%GO:0072522	0.00164827	0.0365636	-1.77683	-1	ACOT7,HK2,PPAT,ACSL4,SCD5,SLC26A2,ATIC,IMPDH1,LDHA,HK1,FASN,GCDH,PFAS,ACACA,MTHFD1,HACD2,ADAL,ADSL,ELOVL6,IMPDH2,PDHA1,TGFB1,ACSF3
REGULATION OF GRANULOCYTE CHEMOTAXIS%GOBP%GO:0071622	REGULATION OF GRANULOCYTE CHEMOTAXIS%GOBP%GO:0071622	0.0017885	0.0395061	1.79512	1	CCR7,MOSPD2,CMKLR1,CD74,TIRAP,DAPK2,CAMK1D,MAPK1,RAC1,C5AR2,THBS1
GPCR LIGAND BINDING%REACTOME%R-HSA-500792.3	GPCR LIGAND BINDING%REACTOME%R-HSA-500792.3	0.00184505	0.0402838	1.58057	1	PTGER4,CCR7,CXCR3,ANXA1,S1PR2,C3,CCL3L3,CCRL2,LPAR1,CMKLR1,MT-RNR2,GPR183,CX3CR1,ADGRE5,FZD2,PSAP,ADRB2,CCR2,CCL1,CCR1,CCL3,GNB5,CALCRL,GNG7,CNR2,C5AR2,ADORA3,GNG5,GNG2,ADGRE1,CD55,FPR1,FZD4,GNAS
POSITIVE REGULATION OF LYMPHOCYTE PROLIFERATION%GOBP%GO:0050671	POSITIVE REGULATION OF LYMPHOCYTE PROLIFERATION%GOBP%GO:0050671	0.00184728	0.0402838	1.64211	1	TNFSF9,ANXA1,HLA-DPA1,CD86,TGFBR2,CD74,GPR183,CD40,NCK1,CCR2,FADD,TIRAP,IL18,TNFSF4,CD38,TFRC,HLA-DMB,HLA-DPB1
POSITIVE REGULATION OF MONONUCLEAR CELL PROLIFERATION%GOBP%GO:0032946	POSITIVE REGULATION OF MONONUCLEAR CELL PROLIFERATION%GOBP%GO:0032946	0.00184728	0.0402838	1.64211	1	TNFSF9,ANXA1,HLA-DPA1,CD86,TGFBR2,CD74,GPR183,CD40,NCK1,CCR2,FADD,TIRAP,IL18,TNFSF4,CD38,TFRC,HLA-DMB,HLA-DPB1
RIP-MEDIATED NFKB ACTIVATION VIA ZBP1%REACTOME%R-HSA-1810476.2	RIP-MEDIATED NFKB ACTIVATION VIA ZBP1%REACTOME%R-HSA-1810476.2	0.00185461	0.0402838	1.84436	1	NFKBIA,TICAM1,RIPK1,NFKB2,NKIRAS2,NKIRAS1
PURINE RIBONUCLEOTIDE BIOSYNTHETIC PROCESS%GOBP%GO:0009152	PURINE RIBONUCLEOTIDE BIOSYNTHETIC PROCESS%GOBP%GO:0009152	0.00192357	0.0416082	-1.76577	-1	ACOT7,HK2,ACSL4,SCD5,SLC26A2,ATIC,IMPDH1,LDHA,HK1,FASN,GCDH,PFAS,ACACA,HACD2,ADSL,ELOVL6,IMPDH2,PDHA1,TGFB1,ACSF3
CHEMOTAXIS%GOBP%GO:0006935	CHEMOTAXIS%GOBP%GO:0006935	0.00198302	0.041821	1.48553	1	CCR7,GFRA2,CXCR3,ANXA1,SEMA3C,CCL3L3,CCRL2,LPAR1,CMKLR1,MT-RNR2,GPR183,MAPK7,EFNA4,PLAUR,SPTA1,PLXNC1,CX3CR1,SEMA4B,ELMO2,CCL24,CCR2,CCL1,GAB1,CCR1,CCL3,NR4A1,SRC,IL6R,MAPK1,CCL23,RAC1,GBF1,PIP5K1C,DAG1,RPS6KA5,MAPK14,ENPP2,SFTPD,EPHA1,HMGB2,GPC1,RAB13,TNFRSF11A,EFNB2,NPTN,PLAU,KLF7,NOTCH1,PIP5K1A,IL16,FEZ2,EFNA1,USP33,LGALS3,DOK2,ARHGEF16
IMMUNE RESPONSE-REGULATING CELL SURFACE RECEPTOR SIGNALING PATHWAY%GOBP%GO:0002768	IMMUNE RESPONSE-REGULATING CELL SURFACE RECEPTOR SIGNALING PATHWAY%GOBP%GO:0002768	0.00197911	0.041821	1.47489	1	FCER1A,MICB,MYO1C,HLA-DQB1,HLA-DQA1,HLA-DRA,HLA-DPA1,BCL10,CRK,CDC42,CMKLR1,TRAF6,HLA-DRB1,CD4,HLA-DRB5,TAB2,ELMO2,FCGR2A,RELB,CD40,FCGR2B,CALM1,NCK1,WIPF2,BTRC,BAIAP2,PLEKHA1,SH2B2,CD38,SRC,MAPK1,NFATC1,TYROBP,RAC1,PDPK1,PSMD5,LILRA2,C5AR2,HLA-DPB1,WASF2,ACTR2,RPS6KA5,RC3H2,CLEC10A,ICAM2,FPR1,ARPC2,MAP2K7,RC3H1,PSMD11
MATURATION OF 5.8S RRNA%GOBP%GO:0000460	MATURATION OF 5.8S RRNA%GOBP%GO:0000460	0.00196716	0.041821	-1.957	-1	RRP15,EXOSC8,WDR12,NOP9,URB1,PES1,MAK16,EXOSC2,UTP20,RRS1,KRI1,LAS1L,EXOSC7,RPP40,EXOSC4
NEGATIVE REGULATION OF EXTRINSIC APOPTOTIC SIGNALING PATHWAY%GOBP%GO:2001237	NEGATIVE REGULATION OF EXTRINSIC APOPTOTIC SIGNALING PATHWAY%GOBP%GO:2001237	0.00195737	0.041821	1.65382	1	TNFAIP3,MAPK7,ICAM1,ACVR1,AR,HMOX1,RNF34,TNFSF10,RIPK1,FADD,HSPA1B,SRC,TNFRSF10B,TGFBR1,THBS1,FAS,HTT,LGALS3,CASP8
NUCLEOBASE-CONTAINING COMPOUND TRANSPORT%GOBP%GO:0015931	NUCLEOBASE-CONTAINING COMPOUND TRANSPORT%GOBP%GO:0015931	0.00201588	0.041821	-1.6533	-1	SRSF7,FMR1,PHAX,MRPL18,XPOT,SLC17A9,NOP9,XPO5,NUP107,CPSF1,NOL6,MAGOHB,SRSF1,DDX39A,XPO1,NUP50,NUP43,SEH1L,SLC25A33,CPSF3,RRS1,SYMPK,DDX39B,ARC,ABCC5,NCBP1,NUP155,CR1,SMG7,U2AF1,SLC25A24,SLC29A2,THOC3,PNPT1,SLC25A19,SRSF5,LTV1,THOC6,THOC1,MCM3AP,ABCE1,RAN,NXT1,PCID2,SLC25A4,DDX19A,SLC25A36
ORGANOPHOSPHATE BIOSYNTHETIC PROCESS%GOBP%GO:0090407	ORGANOPHOSPHATE BIOSYNTHETIC PROCESS%GOBP%GO:0090407	0.00199445	0.041821	-1.46116	-1	ACOT7,FADS1,HK2,PPAT,CTPS1,STARD7,ACSL4,FIG4,DHODH,PPIP5K2,SCD5,SLC26A2,PIGX,ATIC,LPCAT1,IMPDH1,MOCS2,LDHA,PLD6,DGKA,HK1,PIK3CB,PIP4K2A,MBOAT1,FASN,GCDH,SPHK2,CMPK1,DUT,NAPRT,ABHD5,PTDSS2,PFAS,RFK,ACACA,NUS1,SORD,NAMPT,PIGF,ACP6,TAZ,MTHFD1,AGPAT5,HACD2,PIGK,CAD,ADSL,ELOVL6,IMPDH2,PARP10,LCAT,PDHA1,TGFB1,ACSF3,PIGQ,RRM2B,XYLB,TPI1,INPP5D,DDHD1,RAB4A,NME2
PHOSPHOLIPID DEPHOSPHORYLATION%GOBP%GO:0046839	PHOSPHOLIPID DEPHOSPHORYLATION%GOBP%GO:0046839	0.00201378	0.041821	1.78485	1	SYNJ2,MTMR9,PLPP1,OCRL,INPP5F,MTMR6,SACM1L,MTMR3,MTM1,PLPP6,MTMR11,MTMR12
POSITIVE REGULATION OF INTERLEUKIN-8 PRODUCTION%GOBP%GO:0032757	POSITIVE REGULATION OF INTERLEUKIN-8 PRODUCTION%GOBP%GO:0032757	0.00197933	0.041821	1.72438	1	BCL10,CD74,RIPK1,FADD,TIRAP,HSPA1B,CLEC7A,DDX58,TLR4,TLR7,CD244,CD2
PYRIMIDINE METABOLISM%WIKIPATHWAYS_20201210%WP4022%HOMO SAPIENS	PYRIMIDINE METABOLISM%WIKIPATHWAYS_20201210%WP4022%HOMO SAPIENS	0.00202165	0.041821	-1.8381	-1	CTPS1,DHODH,POLR3F,POLR3H,CMPK1,DUT,POLR2K,POLR1D,NME7,POLR3E,POLA2,POLR3C,CAD,NT5M,RRM2B,POLR1A,POLA1,NME2,DCTPP1,POLR2H,POLR2C,POLE,PNPT1,POLR2J3,DCTD,DTYMK,UMPS,UCK2
REGULATION OF LIPID TRANSPORT%GOBP%GO:0032368	REGULATION OF LIPID TRANSPORT%GOBP%GO:0032368	0.00201461	0.041821	1.73559	1	ANXA2,SPP1,NR1H2,ABCA1,EEPD1,NFKBIA,ACSL1,DBI,LDLRAP1,THBS1,SREBF2,GHRL,CAV1,TNFRSF11A,P2RX4
TAXIS%GOBP%GO:0042330	TAXIS%GOBP%GO:0042330	0.00198302	0.041821	1.48553	1	CCR7,GFRA2,CXCR3,ANXA1,SEMA3C,CCL3L3,CCRL2,LPAR1,CMKLR1,MT-RNR2,GPR183,MAPK7,EFNA4,PLAUR,SPTA1,PLXNC1,CX3CR1,SEMA4B,ELMO2,CCL24,CCR2,CCL1,GAB1,CCR1,CCL3,NR4A1,SRC,IL6R,MAPK1,CCL23,RAC1,GBF1,PIP5K1C,DAG1,RPS6KA5,MAPK14,ENPP2,SFTPD,EPHA1,HMGB2,GPC1,RAB13,TNFRSF11A,EFNB2,NPTN,PLAU,KLF7,NOTCH1,PIP5K1A,IL16,FEZ2,EFNA1,USP33,LGALS3,DOK2,ARHGEF16
RNA PHOSPHODIESTER BOND HYDROLYSIS%GOBP%GO:0090501	RNA PHOSPHODIESTER BOND HYDROLYSIS%GOBP%GO:0090501	0.00205581	0.0423595	-1.80731	-1	EXOSC8,TOE1,NOP9,CPSF1,PCF11,TSR1,NYNRIN,RCL1,EXOSC2,UTP20,CPSF3,RRS1,ELAC2,KRI1,DICER1,NCBP1,TBL3,EXOSC7,BMS1,RPP40
RIBOSE PHOSPHATE METABOLIC PROCESS%GOBP%GO:0019693	RIBOSE PHOSPHATE METABOLIC PROCESS%GOBP%GO:0019693	0.00207165	0.0425178	-1.54463	-1	ACOT7,RPIA,HK2,CTPS1,NDUFB5,ACSL4,DHODH,SCD5,SLC26A2,ATIC,IMPDH1,MOCS2,LDHA,HK1,BPNT1,FASN,SULT1B1,GCDH,CMPK1,FAR2,PFAS,RFK,ACACA,TAZ,SULT1A1,HACD2,CAD,COA6,RNASEH2B,ADSL,ELOVL6,IMPDH2,HSPA8,PDHA1,TGFB1,ACSF3
EGFR1%NETPATH%EGFR1	EGFR1%NETPATH%EGFR1	0.00212829	0.0435089	1.4091	1	ANXA2,LDLR,ANXA1,ADAM17,SDCBP,SOCS3,DYRK1B,S100A10,LAPTM4A,REPS2,CRK,CDC42,PPP2R3A,MAPK7,KIAA1217,ARHGEF5,SDC4,ELMO2,LPP,RIPK1,MYC,PDZD11,RAB5A,CAV2,NCK1,AHNAK,INSR,SPRY1,BAIAP2,CBL,PTPRE,CDH2,ADAM9,PHLPP1,SOS2,SOCS1,SRC,MAPK1,AXL,PTTG1IP,GIT2,RAC1,PDPK1,MAP2K3,CSTB,RICTOR,CAMK2A,TNS3,ZFYVE16,CRKL,ERRFI1,ARF4,ACTR2,RPS6KA5,MAPK14,PIK3C2B,CALCOCO2,EPHA1,YWHAZ
REGULATION OF IMMUNE EFFECTOR PROCESS%GOBP%GO:0002697	REGULATION OF IMMUNE EFFECTOR PROCESS%GOBP%GO:0002697	0.00218538	0.0445015	1.42096	1	MICB,VAMP3,ANXA1,TNFAIP3,HLA-DRA,MYB,CD86,BCL10,HAVCR2,A2M,C3,CD74,TRAF6,FBXO38,HLA-DRB1,ZCCHC3,ZBTB1,TICAM1,CD40,SEC14L1,FCGR2B,CCR2,FADD,IL18,TNFSF4,BIRC3,TFRC,CD84,TNFRSF1B,HLA-DMB,DDX58,B2M,C5AR2,DTX3L,NLRP3,SOCS5,KMT5B,RC3H2,CD244,GRN,CD55,RC3H1,SERPING1,SLC15A4
NEGATIVE REGULATION OF CELL GROWTH%GOBP%GO:0030308	NEGATIVE REGULATION OF CELL GROWTH%GOBP%GO:0030308	0.00221783	0.0449865	1.61838	1	CDKN1A,SMAD3,SERTAD3,FLCN,SEMA3C,SMAD4,SEMA4B,RNF6,EI24,SESN2,VGLL4,HSPA1B,SERTAD2,IP6K2,PRDM11
BIOCARTA_P53HYPOXIA_PATHWAY%MSIGDB_C2%BIOCARTA_P53HYPOXIA_PATHWAY	BIOCARTA_P53HYPOXIA_PATHWAY%MSIGDB_C2%BIOCARTA_P53HYPOXIA_PATHWAY	0.00225858	0.0455165	1.82905	1	CDKN1A,MDM2,DNAJB1,ABCB1,NQO1
EPITHELIAL CELL DEVELOPMENT%GOBP%GO:0002064	EPITHELIAL CELL DEVELOPMENT%GOBP%GO:0002064	0.00226142	0.0455165	1.6944	1	ICAM1,PPP1R16B,PECAM1,CDH2,SRC,RDX,RAP1B,IQGAP1,F11R,RAP2C,RAPGEF1,RAB13,RAP1A,RAB1A,MYADM,PDE4D,IL6ST,RAB1B,RAP2B,DLL1,TMEM79,EZR,RILPL2,RAPGEF2
PROTEIN TARGETING TO MITOCHONDRION%GOBP%GO:0006626	PROTEIN TARGETING TO MITOCHONDRION%GOBP%GO:0006626	0.002304	0.0461951	-1.84479	-1	TOMM34,TIMM17B,TOMM40,TIMM44,TOMM5,TIMM9,TIMM23B,TIMM22,HSP90AA1,CHCHD4,TOMM40L,DNAJC19,PMPCA,HSPD1,PITRM1,TOMM70,TIMM17A
POSITIVE REGULATION OF KINASE ACTIVITY%GOBP%GO:0033674	POSITIVE REGULATION OF KINASE ACTIVITY%GOBP%GO:0033674	0.00234295	0.0467962	1.39624	1	CCR7,NCF1,CDKN1A,ADAM17,IRAK2,CD86,CRK,CHI3L1,S1PR2,TGFBR2,CD74,TRAF6,AVPI1,HLA-DRB1,ATG14,CD4,ARHGEF5,PIK3R4,CCNYL1,TAB2,CARD10,CDK1,CD40,ZFP91,RIPK1,CALM1,ADRB2,INSR,TIRAP,IL18,PAK4,ADAM9,SRC,IL6R,MAPK1,AXL,FGFR1,TNFRSF10B,SNX9,PDPK1,IQGAP1,MAP2K3,ZNF622,RICTOR,PDCD10,DUSP5,MMD,PIFO,TLR6,CRKL,TAOK1,STOX1,TLR4,TGFBR1,THBS1,MAPK14,SPAG9,GDF15,MAPKAPK2,FGFR3,RAPGEF1,EPHA1,MADD,ECT2,GHRL,RAP1A,TNFR…
VITAMIN D RECEPTOR PATHWAY%WIKIPATHWAYS_20201210%WP2877%HOMO SAPIENS	VITAMIN D RECEPTOR PATHWAY%WIKIPATHWAYS_20201210%WP2877%HOMO SAPIENS	0.0023595	0.0469469	1.62794	1	PTGER4,CDKN1A,HLA-DQA1,DUSP10,TNFAIP3,LRRC25,THBD,HLA-DRB1,S100A6,ADGRE5,CD40,ABCB1,MYC,ADRB2,ABCD1,MX2,JUNB,TREM1,NINJ1,TIMP3
POSITIVE REGULATION OF LEUKOCYTE PROLIFERATION%GOBP%GO:0070665	POSITIVE REGULATION OF LEUKOCYTE PROLIFERATION%GOBP%GO:0070665	0.00239916	0.0475544	1.62063	1	TNFSF9,ANXA1,HLA-DPA1,CD86,TGFBR2,CD74,GPR183,CD40,NCK1,CCR2,FADD,TIRAP,IL18,TNFSF4,CD38,MAPK1,TFRC,HLA-DMB,HLA-DPB1
RESPONSE TO ACID CHEMICAL%GOBP%GO:0001101	RESPONSE TO ACID CHEMICAL%GOBP%GO:0001101	0.0024324	0.0480308	1.65063	1	PTGER4,CCR7,MICB,RRAGC,SESN1,SLC38A2,RARG,SESN2,ZNF35,TNFSF4,ADNP2,RRAGD,FOXO3,LAMTOR3,TMBIM6,GNG2
EGFR1%IOB%EGFR1	EGFR1%IOB%EGFR1	0.00245509	0.0482957	1.42432	1	ANXA2,LDLR,ANXA1,ADAM17,SDCBP,SOCS3,DYRK1B,S100A10,LAPTM4A,REPS2,CRK,CDC42,PPP2R3A,MAPK7,KIAA1217,ARHGEF5,SDC4,ELMO2,LPP,RIPK1,MYC,PDZD11,RAB5A,CAV2,NCK1,AHNAK,INSR,SPRY1,BAIAP2,CBL,PTPRE,CDH2,ADAM9,PHLPP1,SOS2,SOCS1,SRC,MAPK1,AXL,PTTG1IP,GIT2,RAC1,PDPK1,MAP2K3,CSTB,CAMK2A,TNS3,ZFYVE16,CRKL,ERRFI1,ARF4,ACTR2,RPS6KA5,MAPK14,PIK3C2B,CALCOCO2,EPHA1,YWHAZ
POSITIVE REGULATION OF CD4-POSITIVE, ALPHA-BETA T CELL ACTIVATION%GOBP%GO:2000516	POSITIVE REGULATION OF CD4-POSITIVE, ALPHA-BETA T CELL ACTIVATION%GOBP%GO:2000516	0.00249486	0.0488936	1.83837	1	ANXA1,HLA-DRA,MYB,CD86,TGFBR2,HLA-DRB1,IL18,TNFSF4,SOCS1,NLRP3,SOCS5,CD55
LEUKOCYTE CHEMOTAXIS%GOBP%GO:0030595	LEUKOCYTE CHEMOTAXIS%GOBP%GO:0030595	0.00257628	0.0503001	1.66516	1	CCR7,ANXA1,CCL3L3,MT-RNR2,GPR183,CCL24,CCR2,CCL1,CCR1,CCL3,IL6R,CCL23,GBF1,PIP5K1C,SFTPD
POSITIVE REGULATION OF MRNA CATABOLIC PROCESS%GOBP%GO:0061014	POSITIVE REGULATION OF MRNA CATABOLIC PROCESS%GOBP%GO:0061014	0.00259093	0.0503974	1.691	1	BTG2,TOB1,TNRC6C,TNRC6A,CNOT8,TNRC6B,ZFP36L2,METTL14,RC3H1,MEX3D
HALLMARK_COAGULATION%MSIGDB_C2%HALLMARK_COAGULATION	HALLMARK_COAGULATION%MSIGDB_C2%HALLMARK_COAGULATION	0.00263965	0.0511543	1.64897	1	CRIP2,ANXA1,A2M,THBD,PECAM1,LAMP2,USP11,ADAM9,SH2B2,PRSS23,RAC1,TIMP3,CTSO,ARF4,THBS1,DUSP14,SERPING1,KLF7
NEGATIVE REGULATION OF PROTEIN SERINE/THREONINE KINASE ACTIVITY%GOBP%GO:0071901	NEGATIVE REGULATION OF PROTEIN SERINE/THREONINE KINASE ACTIVITY%GOBP%GO:0071901	0.00267363	0.0516208	1.60322	1	CDKN1C,DUSP10,SORL1,RGS2,RGS14,PKIG,PDCD4,SPRY1,AIDA,SPRY3,LATS1,SMPD1,DUSP5,SPRED2,CAV1,APC
REGULATION OF MRNA STABILITY BY PROTEINS THAT BIND AU-RICH ELEMENTS%REACTOME DATABASE ID RELEASE 75%450531	REGULATION OF MRNA STABILITY BY PROTEINS THAT BIND AU-RICH ELEMENTS%REACTOME DATABASE ID RELEASE 75%450531	0.00269945	0.0517361	-1.74097	-1	ELAVL1,EXOSC8,PSMA8,EXOSC5,XPO1,UBC,PSMD10,PSMB8,EXOSC2,EIF4G1,TNFSF13,HSPA8,PSMB4,PSMB9,PSMA5,TNPO1,ANP32A,PSMA3,EXOSC7,PSMC5,PSMC4,EXOSC4,PRKCA,PSMA2,PSMD3
REGULATION OF TRIGLYCERIDE METABOLIC PROCESS%GOBP%GO:0090207	REGULATION OF TRIGLYCERIDE METABOLIC PROCESS%GOBP%GO:0090207	0.00269734	0.0517361	1.81909	1	LDLR,CNEP1R1,SORL1,NR1H2,C3
ESTABLISHMENT OF RNA LOCALIZATION%GOBP%GO:0051236	ESTABLISHMENT OF RNA LOCALIZATION%GOBP%GO:0051236	0.00277253	0.0527488	-1.62584	-1	SRSF7,FMR1,PHAX,MRPL18,XPOT,NOP9,XPO5,NUP107,CPSF1,NOL6,MAGOHB,SRSF1,DDX39A,XPO1,NUP50,NUP43,SEH1L,CPSF3,RRS1,SYMPK,DDX39B,ARC,NCBP1,ATR,NUP155,SMG7,U2AF1,THOC3,PNPT1,SRSF5,LTV1,THOC6,THOC1,MCM3AP,ABCE1,RAN,NXT1,PCID2,DDX19A
SENESCENCE AND AUTOPHAGY IN CANCER%WIKIPATHWAYS_20201210%WP615%HOMO SAPIENS	SENESCENCE AND AUTOPHAGY IN CANCER%WIKIPATHWAYS_20201210%WP615%HOMO SAPIENS	0.00276658	0.0527488	1.60896	1	CDKN1A,MDM2,SQSTM1,ULK1,ATG14,SMAD4,LAMP2,IGFBP7,GABARAPL1,CCL3,SRC,IL6R,MAPK1,IRF7,GABARAP,MAP2K3,RNASEL,IRF1,THBS1,MAPK14,AMBRA1,IL6ST,IGF1R,SH3GLB1,RB1,GABARAPL2,KMT2A,ING1,BRAF,RAF1
RESPONSE TO TOPOLOGICALLY INCORRECT PROTEIN%GOBP%GO:0035966	RESPONSE TO TOPOLOGICALLY INCORRECT PROTEIN%GOBP%GO:0035966	0.00278883	0.052866	-1.59576	-1	HSPE1,SSR1,SRPRB,DNAJA1,GFPT1,F12,HSPH1,CLGN,STT3B,HDGF,XBP1,BAG3,SERP1,YOD1,CXXC1,HSPA5,EIF2S1,RHBDD1,DDX11,HSPA8,DNAJC3,TBL2,PPP2R5B,TSPYL2,HSP90AA1,YIF1A,PARP16,BAK1,HSPA14,DCTN1,KLHL15
CHAPERONE-MEDIATED PROTEIN FOLDING%GOBP%GO:0061077	CHAPERONE-MEDIATED PROTEIN FOLDING%GOBP%GO:0061077	0.00282885	0.0530548	-1.75188	-1	HSPE1,FKBP4,CHORDC1,FKBP5,DFFA,HSPA5,SDF2L1,CCT2,BAG1,HSPA8
NEGATIVE REGULATION OF IMMUNE RESPONSE%GOBP%GO:0050777	NEGATIVE REGULATION OF IMMUNE RESPONSE%GOBP%GO:0050777	0.00282932	0.0530548	1.62512	1	ANXA1,TNFAIP3,NR1H2,HAVCR2,A2M,SAMSN1,HLA-DRB1,FCGR2B,CCR2,TRIM21,TNFSF4,CD84,TRAFD1,SOCS5,RC3H2,GRN,CD55,RC3H1,SERPING1
REGULATION OF T CELL DIFFERENTIATION%GOBP%GO:0045580	REGULATION OF T CELL DIFFERENTIATION%GOBP%GO:0045580	0.00281274	0.0530548	1.62057	1	TNFSF9,ANXA1,DUSP10,HLA-DRA,MYB,CD86,TGFBR2,HLA-DRB1,ZBTB1,CCR2,IL18,TNFSF4,SOCS1,IRF1,NLRP3,SOCS5,RC3H2,RC3H1,CD2,IRF4,TESPA1,PRDM1,LILRB4,VNN1
REGULATION OF LYMPHOCYTE DIFFERENTIATION%GOBP%GO:0045619	REGULATION OF LYMPHOCYTE DIFFERENTIATION%GOBP%GO:0045619	0.00288774	0.0539563	1.63119	1	TNFSF9,ANXA1,DUSP10,HLA-DRA,MYB,CD86,TGFBR2,HLA-DRB1,ZBTB1,CCR2,IL18,TNFSF4,SOCS1,AXL,IRF1,ZFP36L2,NLRP3,SOCS5,RC3H2,RC3H1,CD2
ESTABLISHMENT OF PROTEIN LOCALIZATION TO MITOCHONDRION%GOBP%GO:0072655	ESTABLISHMENT OF PROTEIN LOCALIZATION TO MITOCHONDRION%GOBP%GO:0072655	0.00290505	0.0540858	-1.8198	-1	TOMM34,TIMM17B,HK2,BCS1L,HK1,TOMM40,TIMM44,TOMM5,TIMM9,COX18,PMAIP1,TIMM23B,TIMM22,HSP90AA1,CHCHD4,TOMM40L,DNAJC19
DRUG TRANSPORT%GOBP%GO:0015893	DRUG TRANSPORT%GOBP%GO:0015893	0.00294745	0.0546799	-1.74498	-1	SLC25A15,SNCA,SLC25A22,TMEM30A,SLC7A1,SLC38A5,SLC17A9,AMN,SLC18A2,RALBP1,CA2,SLC7A5,SLC19A1
BIOCARTA_NTHI_PATHWAY%MSIGDB_C2%BIOCARTA_NTHI_PATHWAY	BIOCARTA_NTHI_PATHWAY%MSIGDB_C2%BIOCARTA_NTHI_PATHWAY	0.0030394	0.0556504	1.77414	1	NFKBIA,TGFBR2,SMAD4,MAP2K3,TGFBR1,MAPK14
MIRNAS INVOLVEMENT IN THE IMMUNE RESPONSE IN SEPSIS%WIKIPATHWAYS_20201210%WP4329%HOMO SAPIENS	MIRNAS INVOLVEMENT IN THE IMMUNE RESPONSE IN SEPSIS%WIKIPATHWAYS_20201210%WP4329%HOMO SAPIENS	0.0030449	0.0556504	1.82523	1	NFKBIA,TRAF6,RELB,CCL3,IRF7,IRF1,TLR4,NFKB2,MAPK14,TLR7
REGULATION OF CHOLESTEROL TRANSPORT%GOBP%GO:0032374	REGULATION OF CHOLESTEROL TRANSPORT%GOBP%GO:0032374	0.00305314	0.0556504	1.75309	1	ANXA2,NR1H2,ABCA1,EEPD1,NFKBIA,LDLRAP1,SREBF2,CAV1
REGULATION OF STEROL TRANSPORT%GOBP%GO:0032371	REGULATION OF STEROL TRANSPORT%GOBP%GO:0032371	0.00305314	0.0556504	1.75309	1	ANXA2,NR1H2,ABCA1,EEPD1,NFKBIA,LDLRAP1,SREBF2,CAV1
RESPONSE TO UNFOLDED PROTEIN%GOBP%GO:0006986	RESPONSE TO UNFOLDED PROTEIN%GOBP%GO:0006986	0.00302108	0.0556504	-1.65854	-1	HSPE1,SSR1,SRPRB,DNAJA1,GFPT1,HSPH1,CLGN,STT3B,HDGF,XBP1,BAG3,SERP1,YOD1,CXXC1,HSPA5,EIF2S1,RHBDD1,DDX11,HSPA8,DNAJC3,TBL2,PPP2R5B,TSPYL2,HSP90AA1,YIF1A,PARP16,BAK1,HSPA14,DCTN1
POSITIVE REGULATION OF INFLAMMATORY RESPONSE%GOBP%GO:0050729	POSITIVE REGULATION OF INFLAMMATORY RESPONSE%GOBP%GO:0050729	0.00306523	0.0556761	1.6215	1	PTGER4,CCR7,NFKBIA,TICAM1,RIPK1,PDCD4,CCR2,CCL1,IL18,CCL3,TNFSF4,CLEC7A,TLR6,PTGS2,TLR4,GBP5,TLR7,CD6,GRN,TNFRSF11A,NAPEPLD,IL16,SNX4,IL6ST
SIGNALING BY INTERLEUKINS%REACTOME DATABASE ID RELEASE 75%449147	SIGNALING BY INTERLEUKINS%REACTOME DATABASE ID RELEASE 75%449147	0.00307991	0.0557203	1.37516	1	ANXA2,CRLF2,CDKN1A,ANXA1,SMAD3,IRAK2,SOCS3,VIM,CD86,HAVCR2,CRK,STX3,SQSTM1,NFKBIA,ATF2,CCL3L3,CDC42,IL1RN,IL10RA,MAPK7,TRAF6,ICAM1,CSF2RA,TOLLIP,HMOX1,CD4,TAB2,CISH,PDCD4,MYC,CCR2,BTRC,CBL,IL18,CCR1,CCL3,MAP3K3,SOS2,SOCS1,JUNB,IL6R,MAPK1,IL3RA,FOXO3,RAP1B,MAP2K3,PSMD5,CAPZA1,TNFRSF1B,CSF2RB,PTGS2,PPP2CB,MEF2A,CRKL,NFKB2,PELI2,IL21R,RPS6KA5,MAPK14,NKIRAS2,MAPKAPK2,RAPGEF1,YWHAZ,NKIRAS1,S100B,IL7R,…
TGF-BETA RECEPTOR SIGNALING%PATHWAY INTERACTION DATABASE NCI-NATURE CURATED DATA%TGF-BETA RECEPTOR SIGNALING	TGF-BETA RECEPTOR SIGNALING%PATHWAY INTERACTION DATABASE NCI-NATURE CURATED DATA%TGF-BETA RECEPTOR SIGNALING	0.00308904	0.0557203	1.70032	1	SMAD3,DYNLRB1,TGFBR2,RNF111,CTNNB1,SMAD4,TAB2,XIAP,PDPK1,CAMK2A,ZFYVE16,PPP2CB,TGFBR1,SMURF2,CAV1,DAB2,PPP2R2A,FKBP1A,YWHAE,MAP3K7
POSITIVE REGULATION OF CELL PROLIFERATION%GOBP%GO:0008284	POSITIVE REGULATION OF CELL PROLIFERATION%GOBP%GO:0008284	0.00311086	0.0559204	1.33139	1	TNFSF9,CRLF2,CDKN1A,MDM2,ANXA1,ADAM17,SDCBP,HLA-DPA1,CD86,STX3,S1PR2,ATF2,TGFBR2,TBC1D8,CD74,GPR183,TTK,CTNNB1,AR,HMOX1,SMAD4,CX3CR1,SERTAD1,PPP1R16B,S100A6,CD40,MYC,CCL24,ID2,CNOT8,NCK1,CCR2,FADD,INSR,LDLRAP1,TIRAP,IL18,SLAMF1,TNFSF4,MAP3K3,NR4A1,CD38,IL6R,MAPK1,FGFR1,PDPK1,TFRC,CLEC7A,KITLG,PDCD10,HLA-DMB,CRKL,STOX1,ZNF268,TLR4,TGFBR1,HLA-DPB1,ZNF304,THBS1,AGGF1,CNOT6,FGFR3,GATA2,EPHA1,S100B,IL…
NEGATIVE REGULATION OF RESPONSE TO WOUNDING%GOBP%GO:1903035	NEGATIVE REGULATION OF RESPONSE TO WOUNDING%GOBP%GO:1903035	0.00313996	0.0562495	1.68287	1	CDKN1A,DUSP10,CRK,THBD,TFPI,PLAUR,CD109,INPP5F
NUCLEIC ACID TRANSPORT%GOBP%GO:0050657	NUCLEIC ACID TRANSPORT%GOBP%GO:0050657	0.00318085	0.0565931	-1.61281	-1	SRSF7,FMR1,PHAX,MRPL18,XPOT,NOP9,XPO5,NUP107,CPSF1,NOL6,MAGOHB,SRSF1,DDX39A,XPO1,NUP50,NUP43,SEH1L,CPSF3,RRS1,SYMPK,DDX39B,ARC,NCBP1,NUP155,SMG7,U2AF1,THOC3,PNPT1,SRSF5,LTV1,THOC6,THOC1,MCM3AP,ABCE1,RAN,NXT1,PCID2,DDX19A
RNA TRANSPORT%GOBP%GO:0050658	RNA TRANSPORT%GOBP%GO:0050658	0.00318085	0.0565931	-1.61281	-1	SRSF7,FMR1,PHAX,MRPL18,XPOT,NOP9,XPO5,NUP107,CPSF1,NOL6,MAGOHB,SRSF1,DDX39A,XPO1,NUP50,NUP43,SEH1L,CPSF3,RRS1,SYMPK,DDX39B,ARC,NCBP1,NUP155,SMG7,U2AF1,THOC3,PNPT1,SRSF5,LTV1,THOC6,THOC1,MCM3AP,ABCE1,RAN,NXT1,PCID2,DDX19A
RESPONSE TO INTERLEUKIN-1%GOBP%GO:0070555	RESPONSE TO INTERLEUKIN-1%GOBP%GO:0070555	0.0032298	0.0572686	1.52478	1	ANXA1,IRAK2,CHI3L1,SQSTM1,NFKBIA,CCL3L3,IL1RN,TRAF6,TOLLIP,TAB2,CD40,CCL24,BTRC,CCL1,CCL3,MAP3K3,SRC,GBP2,CCL23,IGBP1,PSMD5,TANK,USP10,SMPD1,PELI2,RPS6KA5,MAP3K8,TNFRSF11A,RC3H1,PSMD11
LEUKOCYTE MIGRATION%GOBP%GO:0050900	LEUKOCYTE MIGRATION%GOBP%GO:0050900	0.00325444	0.0575099	1.48859	1	CCR7,ITGA5,ANXA1,THBD,CCL3L3,MT-RNR2,CD74,GPR183,GCNT1,ICAM1,CX3CR1,SDC4,PECAM1,CD99,CCL24,CCR2,SLC16A3,CCL1,CCR1,CCL3,SRC,IL6R,CCL23,TNFRSF10B,CD48,GBF1,CD84,TREM1,F11R,ITGA3,PIP5K1C,ITGB7,UMODL1,SFTPD,ITGAX,GPC1,CD244,CAV1,TNFRSF11A,P2RX4,CD2
NUCLEOSIDE BISPHOSPHATE BIOSYNTHETIC PROCESS%GOBP%GO:0033866	NUCLEOSIDE BISPHOSPHATE BIOSYNTHETIC PROCESS%GOBP%GO:0033866	0.00331479	0.0575999	-1.73702	-1	ACOT7,ACSL4,SCD5,SLC26A2,FASN,GCDH,ACACA,HACD2,ELOVL6,PDHA1,ACSF3
POSITIVE REGULATION OF LYMPHOCYTE MIGRATION%GOBP%GO:2000403	POSITIVE REGULATION OF LYMPHOCYTE MIGRATION%GOBP%GO:2000403	0.00330957	0.0575999	1.79299	1	ADAM17,TMEM102,CCR2,FADD,CCL3
POSITIVE REGULATION OF SPROUTING ANGIOGENESIS%GOBP%GO:1903672	POSITIVE REGULATION OF SPROUTING ANGIOGENESIS%GOBP%GO:1903672	0.00331002	0.0575999	1.78547	1	ITGA5,ANXA1,HMOX1,PPP1R16B,MAP3K3,PIK3C2A,PDPK1,PTGS2,GATA2
PURINE NUCLEOSIDE BISPHOSPHATE BIOSYNTHETIC PROCESS%GOBP%GO:0034033	PURINE NUCLEOSIDE BISPHOSPHATE BIOSYNTHETIC PROCESS%GOBP%GO:0034033	0.00331479	0.0575999	-1.73702	-1	ACOT7,ACSL4,SCD5,SLC26A2,FASN,GCDH,ACACA,HACD2,ELOVL6,PDHA1,ACSF3
RIBONUCLEOSIDE BISPHOSPHATE BIOSYNTHETIC PROCESS%GOBP%GO:0034030	RIBONUCLEOSIDE BISPHOSPHATE BIOSYNTHETIC PROCESS%GOBP%GO:0034030	0.00331479	0.0575999	-1.73702	-1	ACOT7,ACSL4,SCD5,SLC26A2,FASN,GCDH,ACACA,HACD2,ELOVL6,PDHA1,ACSF3
OSTEOBLAST DIFFERENTIATION%GOBP%GO:0001649	OSTEOBLAST DIFFERENTIATION%GOBP%GO:0001649	0.00335572	0.0581175	-1.7758	-1	HSPE1,RRBP1,MYBBP1A,HNRNPU,FASN,SYNCRIP
NEGATIVE REGULATION OF WOUND HEALING%GOBP%GO:0061045	NEGATIVE REGULATION OF WOUND HEALING%GOBP%GO:0061045	0.00336717	0.0581227	1.74545	1	CDKN1A,DUSP10,CRK,THBD,TFPI,PLAUR,CD109
CELLULAR RESPONSE TO MECHANICAL STIMULUS%GOBP%GO:0071260	CELLULAR RESPONSE TO MECHANICAL STIMULUS%GOBP%GO:0071260	0.00338769	0.0582179	1.72356	1	PTGER4,TNFSF14,BCL10,CD40,FADD,TNFRSF10B,F11R,IRF1,TLR4,TLR7,FAS,MAP3K2,TMEM150C,CASP8,CNN2,CASP1,MAPK3
DEFENSE RESPONSE TO VIRUS%GOBP%GO:0051607	DEFENSE RESPONSE TO VIRUS%GOBP%GO:0051607	0.00340619	0.0582179	1.6059	1	IFIT2,SERINC5,IFNAR2,BNIP3L,CD40,IFIT3,FADD,MX1,MX2,APOBEC3B,IRF7,SLFN11,RNASEL,IRF1,NLRP1,RTP4,DDX58,DDIT4,OAS2,APOBEC3C,TLR7,SERINC3
RESPONSE TO HYDROGEN PEROXIDE%GOBP%GO:0042542	RESPONSE TO HYDROGEN PEROXIDE%GOBP%GO:0042542	0.00339849	0.0582179	1.72856	1	ANXA1,TNFAIP3,HP,MAPK7,HMOX1,RIPK1,PLEKHA1,ADAM9,HBB,NFE2L2,CYP1B1,PDCD10
CELLULAR RESPONSE TO OXYGEN-CONTAINING COMPOUND%GOBP%GO:1901701	CELLULAR RESPONSE TO OXYGEN-CONTAINING COMPOUND%GOBP%GO:1901701	0.00342997	0.0584329	1.31695	1	PTGER4,NCF1,MDM2,ANXA1,TNFAIP3,RRAGC,SPP1,VIM,CD86,NR4A2,BCL10,SESN1,PSEN1,SLC38A2,MAPK7,TRAF6,ICAM1,CTNNB1,AR,CX3CR1,RAB12,TICAM1,FCGR2B,C2CD5,RIPK1,PDCD4,RHOQ,ATP6V1A,CAV2,ADRB2,SESN2,INSR,ZNF35,BAIAP2,TIRAP,GAB1,PLEKHA1,IL18,ADAM9,ATP6V1D,CCL3,TNFSF4,ADNP2,SH2B2,NR4A1,SRC,MAPK1,AXL,ATP6V0D1,RRAGD,PIK3C2A,NFE2L2,BCAR3,RAP1B,IP6K2,PDPK1,CYP1B1,CLEC7A,CAMK2A,PDCD10,CALCRL,TNFRSF1B,TLR6,RAB11B,TLR…
PID_NECTIN_PATHWAY%MSIGDB_C2%PID_NECTIN_PATHWAY	PID_NECTIN_PATHWAY%MSIGDB_C2%PID_NECTIN_PATHWAY	0.0034909	0.0587034	1.77936	1	CRK,CDC42,CTNNB1,SRC,RAC1,F11R,PIP5K1C,RAPGEF1,RAP1A,ITGAV,NECTIN1,CTNNA1
REGULATION OF FIBROBLAST PROLIFERATION%GOBP%GO:0048145	REGULATION OF FIBROBLAST PROLIFERATION%GOBP%GO:0048145	0.00347304	0.0587034	1.72402	1	CDKN1A,MORC3,CD74,CTNNB1,S100A6,MYC,FTH1,SKI
REGULATION OF RNA STABILITY%GOBP%GO:0043487	REGULATION OF RNA STABILITY%GOBP%GO:0043487	0.00348584	0.0587034	-1.58286	-1	ELAVL1,HNRNPD,EXOSC8,FMR1,HNRNPU,SERBP1,SYNCRIP,PSMA8,EXOSC5,ROCK2,XPO1,UBC,FUS,ZC3H14,PSMD10,FTO,PSMB8,EXOSC2,EIF4G1,TNFSF13,HSPA8,APEX1,ROCK1,PSMB4,PSMB9,PSMA5,NAF1,TNPO1,ANP32A,PSMA3,NSUN2,EXOSC7,YBX3,PSMC5,DDX49,PSMC4,EXOSC4,IGF2BP2,PRKCA,PSMA2,PSMD3,PCID2,DKC1
RESPONSE TO MECHANICAL STIMULUS%GOBP%GO:0009612	RESPONSE TO MECHANICAL STIMULUS%GOBP%GO:0009612	0.00348586	0.0587034	1.61338	1	PTGER4,TNFSF14,BCL10,CHI3L1,CTNNB1,CD40,FADD,CDH2,TNFRSF10B,USP53,F11R,IRF1,TLR4,TLR7,FAS,MAP3K2,HTT,TMEM150C,CASP8,TIFAB,CNN2,CASP1,MAPK3,JUP
EPITHELIAL CELL DIFFERENTIATION%GOBP%GO:0030855	EPITHELIAL CELL DIFFERENTIATION%GOBP%GO:0030855	0.00355868	0.0594596	1.46697	1	ANXA1,TXNIP,CDC42,ICAM1,CTNNB1,ACVR1,TOLLIP,SMAD4,ASAH1,PPP1R16B,CDK1,PECAM1,PSAP,ID2,E2F7,UGCG,CLIC4,KRT17,CDH2,ADAM9,KDM6B,MTSS1,SRC,LATS1,RDX,RAP1B,IQGAP1,E2F8,F11R,RAP2C,SCUBE1,RAPGEF1,RAB13,RAP1A,KRT8,RAB1A,DHRS9,MYADM,NOTCH1,ACVR2B,PLK4,DAB2,TPP1,PIP5K1A,PDE4D,IL6ST,RAP2A,LGALS3,CTSB,ANXA4,RAB1B,TAGLN2,RAP2B,DLL1,JUP,CAPNS1,TMEM79,EZR,RILPL2
REGULATION OF ADAPTIVE IMMUNE RESPONSE%GOBP%GO:0002819	REGULATION OF ADAPTIVE IMMUNE RESPONSE%GOBP%GO:0002819	0.00355702	0.0594596	1.60107	1	ANXA1,TNFAIP3,HLA-DRA,SAMSN1,TRAF6,FBXO38,HLA-DRB1,ZBTB1,CD40,FCGR2B,CCR2,FADD,IL18,TNFSF4,IRF7,TFRC,TNFRSF1B,IRF1,B2M,NLRP3,SOCS5,KMT5B,RC3H2,RC3H1,SLC15A4
NUCLEOSIDE TRIPHOSPHATE BIOSYNTHETIC PROCESS%GOBP%GO:0009142	NUCLEOSIDE TRIPHOSPHATE BIOSYNTHETIC PROCESS%GOBP%GO:0009142	0.0035928	0.059838	-1.72485	-1	HK2,CTPS1,IMPDH1,LDHA,HK1,CMPK1,CAD,IMPDH2,TGFB1,TPI1,NME2,CYC1,GAPDH,PKM,AK1,PFKL,PFKM,ENO1,ENO3,ALDOA,DTYMK,AK4
DRUG TRANSMEMBRANE TRANSPORT%GOBP%GO:0006855	DRUG TRANSMEMBRANE TRANSPORT%GOBP%GO:0006855	0.00363034	0.0602707	-1.86806	-1	SLC25A15,SLC25A22,TMEM30A,SLC7A1,SLC38A5,RALBP1,SLC7A5,SLC19A1,ATP13A2
TOLL-LIKE RECEPTOR CASCADES%REACTOME DATABASE ID RELEASE 75%168898	TOLL-LIKE RECEPTOR CASCADES%REACTOME DATABASE ID RELEASE 75%168898	0.0036639	0.0606346	1.50539	1	IRAK2,NFKBIA,ATF2,MAPK7,TRAF6,PIK3R4,TAB2,TICAM1,RIPK1,FADD,BTRC,TIRAP,BIRC3,SOCS1,MAPK1,IRF7,MAP2K3,TANK,TLR6,PPP2CB,MEF2A,TLR4,NFKB2,PELI2,RPS6KA5,MAPK14,NKIRAS2,MAPKAPK2,TLR7,NKIRAS1,S100B,MAP3K8,MAP2K7,TBK1,ATF1,CASP8,CTSB,CD180,CD36
ALPHA-BETA T CELL ACTIVATION%GOBP%GO:0046631	ALPHA-BETA T CELL ACTIVATION%GOBP%GO:0046631	0.00368189	0.0607396	1.72978	1	PTGER4,ANXA1,GPR183,TNFSF4
PYRIMIDINE NUCLEOTIDE METABOLIC PROCESS%GOBP%GO:0006220	PYRIMIDINE NUCLEOTIDE METABOLIC PROCESS%GOBP%GO:0006220	0.00375441	0.0615729	-1.91192	-1	CTPS1,DHODH,TDG,NEIL2,NTHL1,UNG,CMPK1,DUT,CAD,NT5M,DCTPP1,ENTPD7
REGULATION OF EPITHELIAL TO MESENCHYMAL TRANSITION%GOBP%GO:0010717	REGULATION OF EPITHELIAL TO MESENCHYMAL TRANSITION%GOBP%GO:0010717	0.00375603	0.0615729	1.62602	1	SMAD3,SDCBP,TGFBR2,CTNNB1,ACVR1,SMAD4,SPRY1,TGFBR1,BCL9L,DAG1,FOXA2,WWTR1,SPRED2,ADIPOR1,NOTCH1,DAB2,EFNA1,USF3
RESPONSE TO EXTRACELLULAR STIMULUS%GOBP%GO:0009991	RESPONSE TO EXTRACELLULAR STIMULUS%GOBP%GO:0009991	0.00379505	0.0619639	1.47409	1	LDLR,ZFYVE1,CDKN1A,FLCN,RRAGC,SPP1,NR4A2,BCL10,SORL1,SESN1,ULK1,NUDT15,ATG14,WIPI2,FNIP1,PIK3R4,EIF2AK3,LAMP2,SESN2,TSC1,GABARAPL1,MAPK1,RRAGD,FOXO3,GABARAP,WDR45B,KYNU,BBS4,NUAK2,MTMR3,RASGRP4,GDF15,SSH1,TMBIM6,FOXA2,SREBF2,BCAS3,FAS,GHRL,BECN1,P2RX4
TOLL LIKE RECEPTOR 4 (TLR4) CASCADE%REACTOME DATABASE ID RELEASE 75%166016	TOLL LIKE RECEPTOR 4 (TLR4) CASCADE%REACTOME DATABASE ID RELEASE 75%166016	0.00380365	0.0619639	1.51164	1	IRAK2,NFKBIA,ATF2,MAPK7,TRAF6,TAB2,TICAM1,RIPK1,FADD,BTRC,TIRAP,BIRC3,SOCS1,MAPK1,IRF7,MAP2K3,TANK,TLR6,PPP2CB,MEF2A,TLR4,NFKB2,PELI2,RPS6KA5,MAPK14,NKIRAS2,MAPKAPK2,NKIRAS1,S100B,MAP3K8,MAP2K7,TBK1,ATF1,CASP8,CD180,CD36
NEGATIVE REGULATION OF INTRACELLULAR SIGNAL TRANSDUCTION%GOBP%GO:1902532	NEGATIVE REGULATION OF INTRACELLULAR SIGNAL TRANSDUCTION%GOBP%GO:1902532	0.00383316	0.0619678	1.34615	1	MDM2,PIK3IP1,DUSP10,TNFAIP3,FLCN,SOCS3,TNFAIP1,SORL1,SESN1,TMEM127,ARHGAP25,CD74,RGS2,MAPK7,PLAUR,SMAD4,FNIP1,RGS14,RNF34,CHP1,SEC14L1,RIPK1,CALM1,PDCD4,MYC,ARHGAP12,SESN2,TNFAIP8L1,VGLL4,TSC1,SPRY1,PLEKHA1,AIDA,ARNTL,PHLPP1,SOCS1,SRC,SPRY3,IGBP1,DLG5,NFE2L2,BCL3,PTTG1IP,INPP5F,STMN1,MAP2K3,TANK,USP10,SMPD1,TIMP3,DUSP5,ITGA3,DDIAS,TLR4,KCTD10,DDIT4,DAG1,THBS1,PDE3B,LEPROT,MAPK14
REGULATION OF CELL SHAPE%GOBP%GO:0008360	REGULATION OF CELL SHAPE%GOBP%GO:0008360	0.00383955	0.0619678	1.61394	1	CDC42EP4,ANXA1,FAM171A1,CRK,LPAR1,PLXNC1,CCL24,BAIAP2,CCL3,BRWD3,RDX,RAC1,SYNE3,F11R,FGD6,DAG1,TBCCD1,DMTN,FGD4,RHOC
REGULATION OF CYTOKINE PRODUCTION INVOLVED IN INFLAMMATORY RESPONSE%GOBP%GO:1900015	REGULATION OF CYTOKINE PRODUCTION INVOLVED IN INFLAMMATORY RESPONSE%GOBP%GO:1900015	0.00382215	0.0619678	1.7316	1	TICAM1,PDCD4,ABCD1,CLEC7A,TLR6,TLR4,GBP5,MAPK14,PLD4,PLD3,CD6,ADCY7,MEFV,LILRB4
COENZYME BIOSYNTHETIC PROCESS%GOBP%GO:0009108	COENZYME BIOSYNTHETIC PROCESS%GOBP%GO:0009108	0.00388895	0.0624943	-1.71051	-1	ACOT7,HK2,ACSL4,SCD5,MOCS2,MAT2A,LDHA,HK1,COQ2,FASN,GCDH,UBIAD1,NAPRT,RFK,ACACA,NAMPT,MTHFD1,LIAS,HACD2,QDPR,ELOVL6,PARP10,PDHA1,ACSF3,TPI1,COASY,PARP16,PDSS1,NNMT,COQ10B,GAPDH,PKM,SPR,NADK,PFKL,ACSS1,HAAO,PFKM,ENO1,ENO3,ALDOA,DLAT,DCAKD
POSITIVE REGULATION OF ERBB SIGNALING PATHWAY%GOBP%GO:1901186	POSITIVE REGULATION OF ERBB SIGNALING PATHWAY%GOBP%GO:1901186	0.00389615	0.0624943	1.74176	1	NCF1,ADAM17,AGR2,PLAUR,CBL,BCAR3
ANTIGEN PROCESSING AND PRESENTATION OF PEPTIDE ANTIGEN%GOBP%GO:0048002	ANTIGEN PROCESSING AND PRESENTATION OF PEPTIDE ANTIGEN%GOBP%GO:0048002	0.00401201	0.0641552	1.50366	1	NCF1,HLA-DQB1,HLA-DQA1,VAMP3,HLA-DRA,HLA-DPA1,DYNC1LI2,CD74,SEC24B,HLA-DRB1,HLA-DMA,HLA-DRB5,FCGR2B,NCF2,PSMD5,CAPZA1,HLA-DMB,KIF18A,DYNC1H1,HLA-DOA,B2M,HLA-DPB1,KIF23,TAPBP,PSMD11,SEC23A,AP1G1,DCTN6,DCTN2,AP1S3,KIF2C,CAPZB,RACGAP1,ITGB5,CLTA,CYBB,CD36
REGULATION OF TOLL-LIKE RECEPTOR SIGNALING PATHWAY%WIKIPATHWAYS_20201210%WP1449%HOMO SAPIENS	REGULATION OF TOLL-LIKE RECEPTOR SIGNALING PATHWAY%WIKIPATHWAYS_20201210%WP1449%HOMO SAPIENS	0.00402501	0.0641662	1.5812	1	TNFAIP3,IRAK2,IFNAR2,SQSTM1,NFKBIA,RNF41,TRAF6,TICAM1,CD40,CISH,RIPK1,FADD,TIFA,TIRAP,CCL3,SOCS1,MAPK1,IRF7,RAC1,MAP2K3,TREM1,TLR4,NFKB2,MAPK14,TRAFD1,SFTPD,TLR7
MONONUCLEAR CELL MIGRATION%GOBP%GO:0071674	MONONUCLEAR CELL MIGRATION%GOBP%GO:0071674	0.00403806	0.0641781	1.75387	1	ANXA1,CCL3L3,PECAM1,CCL24,CCR2,CCL1,CCL3,IL6R,CCL23
REGULATION OF T-HELPER CELL DIFFERENTIATION%GOBP%GO:0045622	REGULATION OF T-HELPER CELL DIFFERENTIATION%GOBP%GO:0045622	0.00414575	0.0656894	1.80269	1	ANXA1,HLA-DRA,MYB,CD86,HLA-DRB1,IL18,TNFSF4,NLRP3,SOCS5,RC3H2,RC3H1,IRF4
POSITIVE REGULATION OF MAP KINASE ACTIVITY%GOBP%GO:0043406	POSITIVE REGULATION OF MAP KINASE ACTIVITY%GOBP%GO:0043406	0.00416256	0.0657559	1.50111	1	IRAK2,CRK,S1PR2,TRAF6,AVPI1,ARHGEF5,TAB2,CDK1,CD40,RIPK1,INSR,ADAM9,MAPK1,FGFR1,MAP2K3,PDCD10,DUSP5,TLR6,CRKL,TAOK1,TLR4,TGFBR1,THBS1,MAPK14,SPAG9,GDF15,MAPKAPK2,RAPGEF1,MADD,GHRL,TNFRSF11A,FPR1,MAP3K2,MAP2K7,FLT3
CELLULAR DIVALENT INORGANIC CATION HOMEOSTASIS%GOBP%GO:0072503	CELLULAR DIVALENT INORGANIC CATION HOMEOSTASIS%GOBP%GO:0072503	0.0042057	0.0659376	1.45966	1	MT2A,MT1E,PTGER4,CCR7,CXCR3,SMAD3,CCRL2,LPAR1,CMKLR1,PSEN1,CX3CR1,CD40,CALM1,CAV2,CCR2,CCL1,C19orf12,CCR1,CCL3,GPR157,CCL23,SLC25A23,TMEM178A,PDPK1,C5AR2,MCUB,ANXA6,TPT1,GHRL,CAV1,CD55,FPR1,P2RX4,NPTN,HTT,SLC24A3,MCU
RESPONSE TO ANTIBIOTIC%GOBP%GO:0046677	RESPONSE TO ANTIBIOTIC%GOBP%GO:0046677	0.00419233	0.0659376	1.59199	1	MDM2,ANXA1,TNFAIP3,HP,MAPK7,HMOX1,RIPK1,PLEKHA1,ADAM9,HBB,NFE2L2,CYP1B1,PDCD10
TARGET OF RAPAMYCIN (TOR) SIGNALING%WIKIPATHWAYS_20201210%WP1471%HOMO SAPIENS	TARGET OF RAPAMYCIN (TOR) SIGNALING%WIKIPATHWAYS_20201210%WP1471%HOMO SAPIENS	0.00421201	0.0659376	1.7574	1	IDI1,CDC42,ULK1,TSC1,RRAGD,RAC1,RICTOR,HMGCR,DDIT4,PRKAB1
REGULATION OF LYMPHOCYTE MIGRATION%GOBP%GO:2000401	REGULATION OF LYMPHOCYTE MIGRATION%GOBP%GO:2000401	0.00424293	0.0662227	1.72575	1	ADAM17,TMEM102,CCR2,FADD,CCL3
CHEMOKINE SIGNALING PATHWAY%WIKIPATHWAYS_20201210%WP3929%HOMO SAPIENS	CHEMOKINE SIGNALING PATHWAY%WIKIPATHWAYS_20201210%WP3929%HOMO SAPIENS	0.0042838	0.0664627	1.55659	1	CCR7,NCF1,CXCR3,CRK,NFKBIA,CDC42,CX3CR1,CCL24,CCR2,CCL1,CCR1,CCL3,SOS2,MAPK1,FOXO3,RAC1,GNB5,GNG7,CRKL,GNG5,GNG2,GNAI3,RAP1A
GLUCOCORTICOID RECEPTOR PATHWAY%WIKIPATHWAYS_20201210%WP2880%HOMO SAPIENS	GLUCOCORTICOID RECEPTOR PATHWAY%WIKIPATHWAYS_20201210%WP2880%HOMO SAPIENS	0.00428362	0.0664627	1.73134	1	CDKN1C,ALOX5AP,TNFAIP3,THBD,ARL5B,RGS2,SPRY1,BIRC3,SERTAD2,SRGN,PTGS2,NFKB2,GPR153
SIGNAL TRANSDUCTION BY P53 CLASS MEDIATOR%GOBP%GO:0072331	SIGNAL TRANSDUCTION BY P53 CLASS MEDIATOR%GOBP%GO:0072331	0.00431601	0.0667637	1.56958	1	BTG2,CDKN1A,MDM2,CNOT4,ARID3A,CDK1,E2F7,CNOT8,SESN2,CDC25C,BCL3,E2F8,USP10,ING4,PPP1R13B,DDIT4,CNOT6
VALIDATED TRANSCRIPTIONAL TARGETS OF TAP63 ISOFORMS%PATHWAY INTERACTION DATABASE NCI-NATURE CURATED DATA%VALIDATED TRANSCRIPTIONAL TARGETS OF TAP63 ISOFORMS	VALIDATED TRANSCRIPTIONAL TARGETS OF TAP63 ISOFORMS%PATHWAY INTERACTION DATABASE NCI-NATURE CURATED DATA%VALIDATED TRANSCRIPTIONAL TARGETS OF TAP63 ISOFORMS	0.00434289	0.0669807	1.64185	1	CDKN1A,MDM2,HBP1,ADA,BTRC,DHRS3,NQO1,ITGA3,GDF15,S100A2,FAS
ANTIGEN PROCESSING AND PRESENTATION OF EXOGENOUS ANTIGEN%GOBP%GO:0019884	ANTIGEN PROCESSING AND PRESENTATION OF EXOGENOUS ANTIGEN%GOBP%GO:0019884	0.00441121	0.0678337	1.52333	1	NCF1,HLA-DQB1,HLA-DQA1,VAMP3,HLA-DRA,HLA-DPA1,DYNC1LI2,CD74,SEC24B,HLA-DRB1,HLA-DMA,HLA-DRB5,FCGR2B,NCF2,PSMD5,CAPZA1,HLA-DMB,KIF18A,DYNC1H1,HLA-DOA,B2M,HLA-DPB1,KIF23,TAPBP,PSMD11,SEC23A,AP1G1,DCTN6,DCTN2,AP1S3,KIF2C,CAPZB,RACGAP1,ITGB5,CLTA,CYBB,CD36
GPCRS, CLASS A RHODOPSIN-LIKE%WIKIPATHWAYS_20201210%WP455%HOMO SAPIENS	GPCRS, CLASS A RHODOPSIN-LIKE%WIKIPATHWAYS_20201210%WP455%HOMO SAPIENS	0.00451941	0.0690088	1.60733	1	PTGER4,CCR7,CXCR3,CCRL2,CMKLR1,CX3CR1,ADRB2,CCR2,CCR1,GPR171,CNR2,C5AR2,FPR1,ADORA2B,P2RY13,RABGAP1
LYMPHOCYTE COSTIMULATION%GOBP%GO:0031294	LYMPHOCYTE COSTIMULATION%GOBP%GO:0031294	0.00454057	0.0690088	1.68861	1	TNFSF14,CD86,CDC42,SRC,RAC1,PDPK1,MAP3K8,CAV1,CARD11,LYN
REGULATION OF ERBB SIGNALING PATHWAY%GOBP%GO:1901184	REGULATION OF ERBB SIGNALING PATHWAY%GOBP%GO:1901184	0.00454057	0.0690088	1.53407	1	NCF1,ADAM17,CDC42,AGR2,PLAUR,SPRY1,CBL,BCAR3,ERRFI1,SOCS4,ARHGEF7,SOCS5,STAM,STAM2,CBLB,CNOT9
REGULATION OF MYELOID LEUKOCYTE DIFFERENTIATION%GOBP%GO:0002761	REGULATION OF MYELOID LEUKOCYTE DIFFERENTIATION%GOBP%GO:0002761	0.00452438	0.0690088	1.62572	1	CD74,TRAF6,HLA-DRB1,CD4,RIPK1,MYC,FADD,EVI2B,SIGLEC15,CCR1,CTNNBIP1,CCL3,TYROBP,IRF7,TMEM178A,TLR4,GPR137B,DCSTAMP,LILRB3,CASP8
EPIDERMAL GROWTH FACTOR RECEPTOR SIGNALING PATHWAY%GOBP%GO:0007173	EPIDERMAL GROWTH FACTOR RECEPTOR SIGNALING PATHWAY%GOBP%GO:0007173	0.00458474	0.0694775	1.74272	1	ADAM17,REPS2,GAB1,CBL,SRC,PIK3C2A,PDPK1,IQGAP1,RPS6KA5
TRAF6 MEDIATED NF-KB ACTIVATION%REACTOME DATABASE ID RELEASE 75%933542	TRAF6 MEDIATED NF-KB ACTIVATION%REACTOME DATABASE ID RELEASE 75%933542	0.00461695	0.0697628	1.80084	1	NFKBIA,TRAF6,DDX58,NFKB2,NKIRAS2,NKIRAS1,S100B,IFIH1
REGULATION OF INTERLEUKIN-8 PRODUCTION%GOBP%GO:0032677	REGULATION OF INTERLEUKIN-8 PRODUCTION%GOBP%GO:0032677	0.00465469	0.0701298	1.58371	1	ANXA1,BCL10,CD74,RIPK1,FADD,TIRAP,HSPA1B,BCL3,CLEC7A,TLR6,DDX58,TLR4,C5AR2,TLR7,CD244,CD2,ANXA4,PTPN22
CELLULAR TRANSITION METAL ION HOMEOSTASIS%GOBP%GO:0046916	CELLULAR TRANSITION METAL ION HOMEOSTASIS%GOBP%GO:0046916	0.00469795	0.0703747	1.56952	1	MT2A,MT1E,MT-RNR2,SLC31A2,HMOX1,SMAD4,MYC,ATP6V1A,FTH1,FTL,HEPH,FBXL5,ATP6V0D1,TFRC
TRANSLATION%REACTOME%R-HSA-72766.4	TRANSLATION%REACTOME%R-HSA-72766.4	0.00468688	0.0703747	-1.48369	-1	GFM2,SSR1,SRPRB,MRPL18,EEF1E1,MRPS27,SRP68,LARS2,EIF2S3,EIF4A1,CHCHD1,MRPS33,AARS2,EIF2B3,FARSA,MRPS23,MRPL1,RPL36A,PPA2,MRPL13,NARS2,DARS2,CARS2,MRPL58,EIF4G1,EIF2S1,MRPS25,EIF5,MRPL4,EIF2B1,EIF4A2,AIMP1,MRPS12,FARSB,FARS2,MRPL32,N6AMT1,EIF5B,MRPS31,RPL26L1,MRPS2,MRPL12,EIF2B4,EIF2B2,SSR3,MRPS34,MTFMT,MRPS9,GSPT1,RPL14
G ALPHA (I) SIGNALLING EVENTS%REACTOME DATABASE ID RELEASE 75%418594	G ALPHA (I) SIGNALLING EVENTS%REACTOME DATABASE ID RELEASE 75%418594	0.00478356	0.0712828	1.48713	1	CCR7,LDLR,CXCR3,ANXA1,S1PR2,C3,LPAR1,MT-RNR2,LRP12,GPR183,RGS1,CX3CR1,RGS14,SDC4,PSAP,CALM1,CCR2,CCL1,KPNA2,CCR1,SRC,MAPK1,DHRS3,CAMK2A,GNB5,GNG7,CNR2,CAMK2G,PPP2CB,PLA2G4A,ADORA3,GNG5,GNG2,GPC1,GNAI3,FPR1,DHRS9,GNAS,NAPEPLD,RGS12,GNAI2,ADCY7,PDE4D,P2RY13
HALLMARK_UNFOLDED_PROTEIN_RESPONSE%MSIGDB_C2%HALLMARK_UNFOLDED_PROTEIN_RESPONSE	HALLMARK_UNFOLDED_PROTEIN_RESPONSE%MSIGDB_C2%HALLMARK_UNFOLDED_PROTEIN_RESPONSE	0.00478592	0.0712828	-1.65949	-1	SSR1,SRPRB,RRP9,DDX10,XPOT,NOLC1,EIF4A1,XBP1,BAG3,SLC7A5,NOP56,SERP1,EXOSC5,CXXC1,FUS,ALDH18A1,EIF4G1,EIF2S1,DNAJC3,TTC37,EIF4A2,NABP1,TSPYL2
MITOCHONDRIAL PROTEIN IMPORT%REACTOME DATABASE ID RELEASE 75%1268020	MITOCHONDRIAL PROTEIN IMPORT%REACTOME DATABASE ID RELEASE 75%1268020	0.00490225	0.0728074	-1.72174	-1	TIMM17B,BCS1L,COQ2,TOMM40,TIMM44,TAZ,CHCHD7,TOMM5,TIMM9,COA6,TIMM22,CHCHD4,DNAJC19,CYC1,PMPCA,HSPD1,CHCHD3,PITRM1,SLC25A4,TOMM70,COA4,TIMM17A,GFER
POSITIVE REGULATION OF INTERLEUKIN-2 PRODUCTION%GOBP%GO:0032743	POSITIVE REGULATION OF INTERLEUKIN-2 PRODUCTION%GOBP%GO:0032743	0.00492526	0.0729415	1.76539	1	ANXA1,CD86,TRAF6,CD4,CCR2,CLEC7A,IRF4,CARD11,PDE4D
LYMPHOCYTE ACTIVATION%GOBP%GO:0046649	LYMPHOCYTE ACTIVATION%GOBP%GO:0046649	0.00504604	0.0745184	1.42493	1	PTGER4,CCR7,MICB,ANXA1,ADAM17,TNFSF14,CD86,CD74,GPR183,ICAM1,ZBTB7A,CD4,FNIP1,ADA,SOX13,RELB,CD40,LFNG,FCGR2B,DNAJB9,NCK1,FADD,LRRC8A,TNFSF4,AXL
FOXO-MEDIATED TRANSCRIPTION OF CELL CYCLE GENES%REACTOME%R-HSA-9617828.1	FOXO-MEDIATED TRANSCRIPTION OF CELL CYCLE GENES%REACTOME%R-HSA-9617828.1	0.00509332	0.0750041	1.78179	1	CDKN1A,SMAD3,CCNG2,SMAD4,FOXO3,CAV1
HEMATOPOIETIC OR LYMPHOID ORGAN DEVELOPMENT%GOBP%GO:0048534	HEMATOPOIETIC OR LYMPHOID ORGAN DEVELOPMENT%GOBP%GO:0048534	0.00518944	0.0762043	1.37412	1	PTGER4,CCR7,ANXA2,OSTM1,ANXA1,ADAM17,FLCN,ALAS1,TGFBR2,RRAS,CDC42,CD74,GPR183,ZBTB7A,HLA-DRB1,CD4,FNIP1,SOX13,RELB,ZBTB1,LFNG,FCGR2B,DNAJB9,FADD,EVI2B,TIRAP,LRRC8A,CITED2,SRC,AXL,CD164,TYROBP,KITLG,MELK,TET2,SLC25A38,TGFBR1,ZFP36L2,RASGRP4,CEBPG,MAPK14,DMTN,GATA2,PLD4
LEUKOCYTE DIFFERENTIATION%GOBP%GO:0002521	LEUKOCYTE DIFFERENTIATION%GOBP%GO:0002521	0.00521205	0.0763214	1.47118	1	PTGER4,CCR7,ANXA2,OSTM1,ANXA1,ADAM17,TGFBR2,RRAS,CDC42,CD74,GPR183,ZBTB7A,HLA-DRB1,CD4,FNIP1,SOX13,RELB,LFNG,FCGR2B,DNAJB9,FADD,LRRC8A,SRC,AXL,TYROBP
PHOSPHATIDYLINOSITOL DEPHOSPHORYLATION%GOBP%GO:0046856	PHOSPHATIDYLINOSITOL DEPHOSPHORYLATION%GOBP%GO:0046856	0.00528346	0.0771504	1.76068	1	SYNJ2,MTMR9,OCRL,INPP5F,MTMR6,SACM1L,MTMR3,MTM1,MTMR11,MTMR12
REGULATION OF INTERLEUKIN-6 PRODUCTION%GOBP%GO:0032675	REGULATION OF INTERLEUKIN-6 PRODUCTION%GOBP%GO:0032675	0.00530831	0.0772968	1.57263	1	TNFAIP3,BCL10,CD74,TIRAP,SLAMF1,TNFSF4,IL6R,TYROBP,CLEC7A,LILRA2,TLR6,DDX58,TLR4,C5AR2,MAPKAPK2,TLR7,GHRL,IFIH1,IL16,PTPN22,LILRB4,LILRB2,HLA-B,ARHGEF2
POSITIVE REGULATION OF TRANSFERASE ACTIVITY%GOBP%GO:0051347	POSITIVE REGULATION OF TRANSFERASE ACTIVITY%GOBP%GO:0051347	0.00535241	0.0777217	1.31037	1	CCR7,NCF1,CDKN1A,ADAM17,IRAK2,CD86,SERINC5,ARRDC3,SORL1,CRK,CHI3L1,S1PR2,TGFBR2,CD74,TRAF6,AVPI1,HLA-DRB1,ATG14,CD4,ARHGEF5,DBI,PIK3R4,CCNYL1,TAB2,CARD10,CDK1,CD40,ZFP91,RIPK1,CALM1,MYC,ADRB2,INSR,BTRC,TIRAP,IL18,PAK4,ADAM9,ARRDC4,SRC,IL6R,MAPK1,AXL,FGFR1,TNFRSF10B,SNX9,PDPK1,IQGAP1,MAP2K3,ZNF622,RICTOR,PDCD10,DUSP5,MMD,PIFO,TLR6,CRKL,TAOK1,STOX1,TLR4,TGFBR1,THBS1,MAPK14,SPAG9,DTX3L,GDF15,MAPKAPK…
POSITIVE REGULATION OF EPIDERMAL GROWTH FACTOR RECEPTOR SIGNALING PATHWAY%GOBP%GO:0045742	POSITIVE REGULATION OF EPIDERMAL GROWTH FACTOR RECEPTOR SIGNALING PATHWAY%GOBP%GO:0045742	0.00541673	0.0784372	1.78423	1	NCF1,ADAM17,AGR2,PLAUR,CBL,BCAR3
SULFUR COMPOUND METABOLIC PROCESS%GOBP%GO:0006790	SULFUR COMPOUND METABOLIC PROCESS%GOBP%GO:0006790	0.00549421	0.0793388	-1.50056	-1	ACOT7,B4GAT1,ACSL4,ANGPT1,GSTO1,STAT5B,SCD5,SLC26A2,GGCT,MAT2A,NUBPL,GLRX5,HAGH,BPNT1,FASN,GSR,SULT1B1,GCDH,ST3GAL4,FAR2,ISCU,CHST11,ACACA,B3GNT2,MTHFD1,MICAL1,SULT1A1,LIAS,HACD2,GGT5,B3GNT7,ELOVL6,PDHA1,ACSF3,GLRX3,SLC5A6,BLMH,CNDP2,ACSM3
POSITIVE REGULATION OF T CELL PROLIFERATION%GOBP%GO:0042102	POSITIVE REGULATION OF T CELL PROLIFERATION%GOBP%GO:0042102	0.00553821	0.0797533	1.63225	1	TNFSF9,ANXA1,HLA-DPA1,CD86,TGFBR2,NCK1,CCR2,FADD,IL18,TNFSF4,TFRC,HLA-DMB,HLA-DPB1,CD6,CD55
PROTEIN EXPORT FROM NUCLEUS%GOBP%GO:0006611	PROTEIN EXPORT FROM NUCLEUS%GOBP%GO:0006611	0.00556765	0.0799564	-1.59167	-1	SRSF7,XPOT,ANKLE1,NOP9,XPO5,NUP107,DESI1,CPSF1,NOL6,MAGOHB,SRSF1,DDX39A,XPO6,XPO1,XPO4,NUP50,NUP43,SEH1L,CPSF3,TGFB1,RRS1,SYMPK,DDX39B,NCBP1,NUP155,SMG7,U2AF1,THOC3,SRSF5,LTV1,THOC6,THOC1,MCM3AP,ABCE1,RAN,NXT1,PCID2,CCHCR1,DDX19A,RANBP17,DHX38,SRSF3,NUP210,STRADB,YTHDC1,SRSF2,SRSF9
NEGATIVE REGULATION OF LYMPHOCYTE ACTIVATION%GOBP%GO:0051250	NEGATIVE REGULATION OF LYMPHOCYTE ACTIVATION%GOBP%GO:0051250	0.00559159	0.0800796	1.55826	1	ANXA1,TNFAIP3,CD86,HAVCR2,SAMSN1,HLA-DRB1,SDC4,FCGR2B,TNFSF4,SOCS1,DLG5,TYROBP,IRF1,SFTPD,SOCS5,RC3H2,RC3H1,LGALS3,LYN,PTPN22,LILRB4,TNFAIP8L2,MICA
ACTIVATION OF PROTEIN KINASE ACTIVITY%GOBP%GO:0032147	ACTIVATION OF PROTEIN KINASE ACTIVITY%GOBP%GO:0032147	0.00564886	0.080678	1.45905	1	IRAK2,CD86,CRK,CHI3L1,S1PR2,TGFBR2,TRAF6,AVPI1,TAB2,CARD10,CDK1,ZFP91,RIPK1,ADRB2,INSR,TIRAP,IL18,PAK4,ADAM9,MAPK1,TNFRSF10B,PDPK1,MAP2K3,RICTOR,DUSP5,TLR6,CRKL,TAOK1,TLR4,TGFBR1,THBS1,MAPK14,SPAG9,GDF15,MAPKAPK2,RAPGEF1,MADD,ECT2,GHRL,FPR1,MAP3K2,MAP2K7
NUCLEOSIDE PHOSPHATE CATABOLIC PROCESS%GOBP%GO:1901292	NUCLEOSIDE PHOSPHATE CATABOLIC PROCESS%GOBP%GO:1901292	0.00567588	0.0808426	-1.68758	-1	ACOT7,HK2,TDG,NEIL2,NTHL1,UNG,LDHA,HK1,DUT
POSITIVE REGULATION OF MITOCHONDRIAL MEMBRANE PERMEABILITY%GOBP%GO:0035794	POSITIVE REGULATION OF MITOCHONDRIAL MEMBRANE PERMEABILITY%GOBP%GO:0035794	0.00573442	0.0814538	1.75163	1	BMF,BNIP3L,ATF2,PPIF
REGULATION OF EPIDERMAL GROWTH FACTOR RECEPTOR SIGNALING PATHWAY%GOBP%GO:0042058	REGULATION OF EPIDERMAL GROWTH FACTOR RECEPTOR SIGNALING PATHWAY%GOBP%GO:0042058	0.00590452	0.083642	1.61039	1	NCF1,ADAM17,CDC42,AGR2,PLAUR,SPRY1,CBL,BCAR3,ERRFI1,SOCS4,ARHGEF7,SOCS5,STAM,STAM2,CBLB,CNOT9
T CELL COSTIMULATION%GOBP%GO:0031295	T CELL COSTIMULATION%GOBP%GO:0031295	0.00598825	0.0845983	1.68925	1	TNFSF14,CD86,CDC42,SRC,RAC1,PDPK1,MAP3K8,CAV1,CARD11,LYN
NEGATIVE REGULATION OF CATALYTIC ACTIVITY%GOBP%GO:0043086	NEGATIVE REGULATION OF CATALYTIC ACTIVITY%GOBP%GO:0043086	0.00604513	0.0850768	1.32907	1	CDKN1C,ZFYVE1,CDKN1A,PIK3IP1,ANXA1,DUSP10,SORL1,HP,CSRNP2,RGS2,MAPK7,MASTL,PLAUR,PTX3,ARL6IP1,FNIP1,RGS14,RNF34,CHP1,PKIG,XIAP,CST3,TRIB2,PDCD4,TIMP2,CCR2,TSC1,SPRY1,CBL,AIDA,BIRC3,SRC,SPRY3,IGBP1,DHCR24,LATS1,TRIB1,RDX,SERPINF1,TFIP11,PDPK1,CSTB,F11R,CAMK2A,SERPINB8,MIDN,SMPD1,TIMP3,DUSP5,SH3BP5L,ERRFI1,SOCS4,THBS1,DTX3L,TMBIM6,EPHA1,FOXA2,SOCS5,BCAS3,AKAP5,WWTR1,SPRED2,GNAI3,CAV1,ERCC4,APC,SERP…
REGULATION OF EPIDERMAL GROWTH FACTOR-ACTIVATED RECEPTOR ACTIVITY%GOBP%GO:0007176	REGULATION OF EPIDERMAL GROWTH FACTOR-ACTIVATED RECEPTOR ACTIVITY%GOBP%GO:0007176	0.00607109	0.0850768	1.74049	1	NCF1,ADAM17,CBL,ERRFI1,SOCS4,SOCS5,CBLB
RESPONSE TO LIPID%GOBP%GO:0033993	RESPONSE TO LIPID%GOBP%GO:0033993	0.00606321	0.0850768	1.39921	1	PTGER4,CCR7,MICB,ANXA1,ADAM17,TNFAIP3,SPP1,VIM,CD86,BCL10,TFPI,TGFBR2,IL1RN,KDM3A,TRAF6,CTNNB1,RARG,AR,CX3CR1,TAB2,TICAM1,PDCD4,ZNF35,TIRAP,PLPP1,IL18,ABCG1,ADAM9,CCL3,TNFSF4,ADNP2,SRC,AXL,TRIB1,FOXO3,TNFRSF1B,TLR4,RBFOX2,TGFBR1,ZFP36L2,GRAMD1B,THBS1,SRR,MAPK14,MAPKAPK2,INSIG2,NLRP3,GNG2,HMGB2,FAM210B,CD6,CAV1,TNFRSF11A,FZD4,PPARD
AMIDE BIOSYNTHETIC PROCESS%GOBP%GO:0043604	AMIDE BIOSYNTHETIC PROCESS%GOBP%GO:0043604	0.00619998	0.0866501	-1.4232	-1	SLC25A15,GFM2,ACSL4,DHPS,MRPL18,EEF1E1,MRPS27,CERS1,SCD5,RRBP1,LARS2,EIF2S3,GGCT,EIF4A1,CHCHD1,MRPS33,AARS2,CERS6,EIF2B3,HAGH,FASN,FARSA,MRPS23,MRPL1,GCDH,RPL36A,PPA2,ACACA,MRPL13,NARS2,MTHFD1,DARS2,HACD2,CARS2,MRPL58,EIF4G1,EIF2S1,GGT5,FTSJ1,ZNF598,MRPS25,ELOVL6,RBM4,PDHA1,EIF5,MRPL4,ACSF3,CLN8,EIF2B1,EIF4A2,AIMP1,MRPS12,CNDP2,ZC3H15,EEFSEC,FARSB,GCLC,ABCF1,FARS2,MRPL32,N6AMT1,NEMF,MRPS31,RPL26L…
INTERACTION WITH HOST%GOBP%GO:0051701	INTERACTION WITH HOST%GOBP%GO:0051701	0.00631223	0.087515	1.54305	1	DYNLT1,CTNNB1,CD4,KPNA5,CAV2,IST1,INSR,CBL,KPNA2,SRC,AXL,SMPD1,ZBED1,WWP2,DAG1,CAV1,CASP8,ITGAV,CTNND1,TPCN2,HIPK2,VAPA,NECTIN1
POSITIVE REGULATION OF LIPID BIOSYNTHETIC PROCESS%GOBP%GO:0046889	POSITIVE REGULATION OF LIPID BIOSYNTHETIC PROCESS%GOBP%GO:0046889	0.00629749	0.087515	1.60254	1	LDLR,ANXA1,CNEP1R1,NR1H2,CD74,CHP1,ABCG1,ABCD1,PTGS2
REGULATION OF ALPHA-BETA T CELL DIFFERENTIATION%GOBP%GO:0046637	REGULATION OF ALPHA-BETA T CELL DIFFERENTIATION%GOBP%GO:0046637	0.0063043	0.087515	1.66944	1	ANXA1,HLA-DRA,MYB,CD86,TGFBR2,HLA-DRB1,IL18,TNFSF4,SOCS1,NLRP3,SOCS5,RC3H2,RC3H1,IRF4,PRDM1,LILRB4
PEPTIDE BIOSYNTHETIC PROCESS%GOBP%GO:0043043	PEPTIDE BIOSYNTHETIC PROCESS%GOBP%GO:0043043	0.00639346	0.0884062	-1.43548	-1	GFM2,DHPS,MRPL18,EEF1E1,MRPS27,RRBP1,LARS2,EIF2S3,GGCT,EIF4A1,CHCHD1,MRPS33,AARS2,EIF2B3,HAGH,FARSA,MRPS23,MRPL1,RPL36A,PPA2,MRPL13,NARS2,DARS2,CARS2,MRPL58,EIF4G1,EIF2S1,GGT5,FTSJ1,ZNF598,MRPS25,RBM4,EIF5,MRPL4,EIF2B1,EIF4A2,AIMP1,MRPS12,CNDP2,ZC3H15,EEFSEC,FARSB,GCLC,ABCF1,FARS2,MRPL32,N6AMT1,NEMF,MRPS31,RPL26L1,DDX3X,MRPS2,MRPL12,EIF2B4,EIF2B2,MRPS34,TNIP1,MRPS9,GSPT1,RPL14
POSITIVE REGULATION OF DEFENSE RESPONSE%GOBP%GO:0031349	POSITIVE REGULATION OF DEFENSE RESPONSE%GOBP%GO:0031349	0.00644035	0.0885846	1.34253	1	PTGER4,CCR7,TNFAIP3,IRAK2,BCL10,NFKBIA,TRAF6,POLR3B,ZCCHC3,PIK3R4,TAB2,RELB,TICAM1,CD40,RIPK1,PDCD4,OPTN,CCR2,FADD,BTRC,CCL1,TIFA,TIRAP,IL18,CCL3,TNFSF4,HSPA1B,BIRC3,SRC,TYROBP,IRF7,PDPK1,CLEC7A,PSMD5,TANK,LILRA2,TLR6,PTGS2,DDX58,TLR4,GBP5,SLC15A3,OTULIN,RPS6KA5,MAPKAPK2,SFTPD,TLR7,CD6,CLEC10A,ICAM2,GRN,CAV1,TNFRSF11A,LACC1,PSMD11,SLC15A4,PIK3AP1,IFIH1,NAPEPLD,AP1G1,TBK1,CARD11,IL16,SNX4,IL6ST,CA…
RNA EXPORT FROM NUCLEUS%GOBP%GO:0006405	RNA EXPORT FROM NUCLEUS%GOBP%GO:0006405	0.0064327	0.0885846	-1.59142	-1	SRSF7,PHAX,XPOT,NOP9,XPO5,NUP107,CPSF1,NOL6,MAGOHB,SRSF1,DDX39A,XPO1,NUP50,NUP43,SEH1L,CPSF3,RRS1,SYMPK,DDX39B,NCBP1,NUP155,SMG7,U2AF1,THOC3,SRSF5,LTV1,THOC6,THOC1,MCM3AP,ABCE1,RAN,NXT1,PCID2,DDX19A,DHX38,SRSF3,NUP210
HALLMARK_XENOBIOTIC_METABOLISM%MSIGDB_C2%HALLMARK_XENOBIOTIC_METABOLISM	HALLMARK_XENOBIOTIC_METABOLISM%MSIGDB_C2%HALLMARK_XENOBIOTIC_METABOLISM	0.00651469	0.0886713	1.56168	1	MT2A,IDH1,ALAS1,SMOX,CROT,HMOX1,SERTAD1,ID2,GABARAPL1,ALDH9A1,EPHX1,NINJ1,NQO1,KYNU
NUCLEOTIDE CATABOLIC PROCESS%GOBP%GO:0009166	NUCLEOTIDE CATABOLIC PROCESS%GOBP%GO:0009166	0.00651469	0.0886713	-1.68241	-1	ACOT7,HK2,TDG,NEIL2,NTHL1,UNG,LDHA,HK1,DUT
POSITIVE REGULATION OF CELLULAR AMIDE METABOLIC PROCESS%GOBP%GO:0034250	POSITIVE REGULATION OF CELLULAR AMIDE METABOLIC PROCESS%GOBP%GO:0034250	0.00651187	0.0886713	-1.61541	-1	ELAVL1,HNRNPD,NAT10,FMR1,MRPS27,EIF2S3,TNFRSF1A,RPUSD3,JMJD4,CASP3,SPHK2,ROCK2,PPP1R15A,EIF4G1,ABCA2,DNAJC3
REGULATION OF PEPTIDYL-TYROSINE PHOSPHORYLATION%GOBP%GO:0050730	REGULATION OF PEPTIDYL-TYROSINE PHOSPHORYLATION%GOBP%GO:0050730	0.00646573	0.0886713	1.53012	1	NCF1,ITGA5,ADAM17,SOCS3,SAMSN1,CD74,ACVR1,PECAM1,CD40,CBL,IL18,SOCS1,SRC,IL6R,INPP5F,SH3BP5L,RAP2C,ERRFI1,SOCS4,ENPP2,DMTN,FGFR3,SOCS5,CAV1,FLT3,EFNA1,CSPG4,CBLB,IL6ST,LYN
VALIDATED TARGETS OF C-MYC TRANSCRIPTIONAL ACTIVATION%PATHWAY INTERACTION DATABASE NCI-NATURE CURATED DATA%VALIDATED TARGETS OF C-MYC TRANSCRIPTIONAL ACTIVATION	VALIDATED TARGETS OF C-MYC TRANSCRIPTIONAL ACTIVATION%PATHWAY INTERACTION DATABASE NCI-NATURE CURATED DATA%VALIDATED TARGETS OF C-MYC TRANSCRIPTIONAL ACTIVATION	0.00655776	0.089025	-1.69816	-1	MTDH,TAF12,CDC25A,TAF4B,KAT2A,EIF4A1,CCND2,LDHA,PTMA,PIM1,RUVBL1,EIF4G1,CAD,EIF2S1,MMP9,PMAIP1,NCL,ODC1,SUPT3H,RUVBL2,NME2,UBTF,FOSL1,HSP90AA1,NME1
ANTIGEN PROCESSING AND PRESENTATION%GOBP%GO:0019882	ANTIGEN PROCESSING AND PRESENTATION%GOBP%GO:0019882	0.00664282	0.0899455	1.41052	1	NCF1,HLA-DQB1,HLA-DQA1,VAMP3,HLA-DRA,HLA-DPA1,DYNC1LI2,CD74,SEC24B,HLA-DRB1,HLA-DMA,HLA-DRB5,FCGR2B,NCF2,PSMD5,CAPZA1,HLA-DMB,KIF18A,DYNC1H1,HLA-DOA,B2M,HLA-DPB1,KIF23,TAPBP,PSMD11,SEC23A,AP1G1,DCTN6,DCTN2,AP1S3,KIF2C,CAPZB,RACGAP1,ITGB5,CLTA,CYBB,CD36
DEFENSE RESPONSE TO OTHER ORGANISM%GOBP%GO:0098542	DEFENSE RESPONSE TO OTHER ORGANISM%GOBP%GO:0098542	0.00669012	0.0903512	1.43223	1	IFIT2,ADAM17,SERINC5,IFNAR2,BNIP3L,CD40,IFIT3,OPTN,FADD,TIRAP,MX1,TNFSF4,MX2,IL6R,GBP2,APOBEC3B,IRF7,SLFN11,RNASEL,CLEC7A,IRF1,TLR6,NLRP1,RTP4,DDX58,TLR4,DDIT4,OAS2,APOBEC3C,CALCOCO2,SFTPD,TLR7,SERINC3,GBP4,RAB14,HMGB2
POSITIVE REGULATION OF T CELL MIGRATION%GOBP%GO:2000406	POSITIVE REGULATION OF T CELL MIGRATION%GOBP%GO:2000406	0.0067317	0.0904443	1.73865	1	ADAM17,TMEM102,CCR2,FADD
RESPONSE TO OXIDATIVE STRESS%GOBP%GO:0006979	RESPONSE TO OXIDATIVE STRESS%GOBP%GO:0006979	0.00671627	0.0904443	1.36966	1	CCR7,MICB,NCF1,ANXA1,TNFAIP3,HP,MAPK7,HMOX1,RGS14,RAD52,RIPK1,SESN2,C19orf12,PLEKHA1,ARNTL,ADAM9,ADNP2,HSPA1B,HBB,CYGB,MAPK1,DHCR24,NCF2,NFE2L2,FOXO3,IPCEF1,ZNF622,CYP1B1,PDCD10,NQO1,ERMP1,ERCC6,ARL6IP5
POSITIVE REGULATION OF TRANSLATION%GOBP%GO:0045727	POSITIVE REGULATION OF TRANSLATION%GOBP%GO:0045727	0.0067553	0.0905279	-1.65311	-1	ELAVL1,HNRNPD,NAT10,FMR1,MRPS27,EIF2S3,RPUSD3,JMJD4
IMMUNE SYSTEM DEVELOPMENT%GOBP%GO:0002520	IMMUNE SYSTEM DEVELOPMENT%GOBP%GO:0002520	0.00683776	0.0911643	1.37956	1	PTGER4,CCR7,ANXA2,OSTM1,ANXA1,ADAM17,TNFAIP3,FLCN,ALAS1,HAVCR2,TGFBR2,RRAS,CDC42,CD74,GPR183,ZBTB7A,HLA-DRB1,CD4,FNIP1,SOX13,RELB,ZBTB1,LFNG,FCGR2B,DNAJB9,FADD,EVI2B,TIRAP,LRRC8A,CITED2,SRC,AXL,CD164,TYROBP,KITLG,MELK,TET2,SLC25A38,TGFBR1,ZFP36L2,RASGRP4,CEBPG,MAPK14,DMTN
NEGATIVE REGULATION OF EXTRINSIC APOPTOTIC SIGNALING PATHWAY VIA DEATH DOMAIN RECEPTORS%GOBP%GO:1902042	NEGATIVE REGULATION OF EXTRINSIC APOPTOTIC SIGNALING PATHWAY VIA DEATH DOMAIN RECEPTORS%GOBP%GO:1902042	0.00683773	0.0911643	1.67225	1	TNFAIP3,ICAM1,HMOX1,RNF34,TNFSF10,RIPK1,FADD,TNFRSF10B
RIBOSOMAL SMALL SUBUNIT BIOGENESIS%GOBP%GO:0042274	RIBOSOMAL SMALL SUBUNIT BIOGENESIS%GOBP%GO:0042274	0.00691624	0.0919755	-1.67694	-1	NAT10,UTP3,NOP9,RRP7BP,RRP7A,WDR46,TSR1,DHX37,UTP20,SURF6,RRS1,NOL10,EMG1,KRI1,TSR3,TBL3,BMS1,RIOK1,LTV1,RPP40,PWP2,HEATR1,UTP4
POSITIVE REGULATION OF RESPONSE TO CYTOKINE STIMULUS%GOBP%GO:0060760	POSITIVE REGULATION OF RESPONSE TO CYTOKINE STIMULUS%GOBP%GO:0060760	0.00697523	0.0925238	1.61267	1	ADAM17,CD74,RIPK1,FADD,HSPA1B,AXL,DDX58,TLR4,IFIH1,CASP1,UBE2K
PID_P38_ALPHA_BETA_PATHWAY%MSIGDB_C2%PID_P38_ALPHA_BETA_PATHWAY	PID_P38_ALPHA_BETA_PATHWAY%MSIGDB_C2%PID_P38_ALPHA_BETA_PATHWAY	0.00701627	0.0928321	1.72887	1	DUSP10,CDC42,TRAF6,RIPK1,SRC,RAC1,MAP2K3,MAPK14,LYN,RALA,RALB
MATURATION OF LSU-RRNA%GOBP%GO:0000470	MATURATION OF LSU-RRNA%GOBP%GO:0000470	0.00708088	0.0934497	-1.84664	-1	RRP15,WDR12,URB1,BOP1,MRPL1,RPL7L1,PES1,MAK16
MATURATION OF SSU-RRNA%GOBP%GO:0030490	MATURATION OF SSU-RRNA%GOBP%GO:0030490	0.00710566	0.0934597	-1.75088	-1	NAT10,UTP3,NOP9,WDR46,TSR1,DHX37,UTP20,RRS1,NOL10,KRI1,TSR3,TBL3,BMS1,RIOK1,RPP40,PWP2,HEATR1,UTP4
MITOCHONDRIAL TRANSLATION%GOBP%GO:0032543	MITOCHONDRIAL TRANSLATION%GOBP%GO:0032543	0.00711749	0.0934597	-1.63586	-1	GFM2,MRPL18,MRPS27,LARS2,CHCHD1,MRPS33,AARS2,MRPS23,MRPL1,MRPL13,DARS2,MRPL58,MRPS25,MRPL4,MRPS12,MRPL32,MRPS31,MRPS2,MRPL12,MRPS34,MRPS9,MRPL15,MRPL24,MRPL2,MRPL9,MRPS26,MRPL28,GATC,QRSL1,RARS2,EARS2,MRPL57,GFM1
REGULATION OF MRNA STABILITY%GOBP%GO:0043488	REGULATION OF MRNA STABILITY%GOBP%GO:0043488	0.00720847	0.0944165	-1.56917	-1	ELAVL1,HNRNPD,EXOSC8,FMR1,HNRNPU,SERBP1,SYNCRIP,PSMA8,EXOSC5,ROCK2,XPO1,UBC,FUS,ZC3H14,PSMD10,FTO,PSMB8,EXOSC2,EIF4G1,TNFSF13,HSPA8,APEX1,ROCK1,PSMB4,PSMB9,PSMA5,TNPO1,ANP32A,PSMA3,EXOSC7,YBX3,PSMC5,PSMC4,EXOSC4,IGF2BP2,PRKCA,PSMA2,PSMD3,PCID2
BONE DEVELOPMENT%GOBP%GO:0060348	BONE DEVELOPMENT%GOBP%GO:0060348	0.00734631	0.0959808	1.60217	1	PTGER4,ANXA2,SRC,RAB23,FGFR3,SKI,ANXA6,SULF2,GNAS,TIFAB,TSKU
PRE-MRNA SPLICING%REACTOME DATABASE ID RELEASE 75%72163	PRE-MRNA SPLICING%REACTOME DATABASE ID RELEASE 75%72163	0.00739086	0.0963214	-1.47766	-1	ELAVL1,HNRNPD,SRSF7,HNRNPU,CPSF1,PCF11,TRA2B,SNRPD3,MAGOHB,SRSF1,POLR2K,U2SURP,FUS,PRPF31,CPSF3,HSPA8,GCFC2,SYMPK,SRSF10,NCBP1,POLR2H,HNRNPF,CWC27,U2AF1,POLR2C,DDX42,SRSF5,CTNNBL1,SRRT,PPIE,SF3A3,LSM2,SRRM2,SNRPA1,SNU13,DHX38,SNRPA,SNRPF,SNRPE,SRSF3,PRPF19,DDX5,SRSF2,SF3A2,SRSF9,GPKOW,HNRNPL,HNRNPR
DIGESTIVE SYSTEM PROCESS%GOBP%GO:0022600	DIGESTIVE SYSTEM PROCESS%GOBP%GO:0022600	0.00748804	0.0971192	1.73932	1	LDLR,UGCG,F11R,TLR4,GHRL,TIFAB,CD36,SOAT2
RESPONSE TO NUTRIENT LEVELS%GOBP%GO:0031667	RESPONSE TO NUTRIENT LEVELS%GOBP%GO:0031667	0.00748934	0.0971192	1.43395	1	LDLR,ZFYVE1,CDKN1A,FLCN,RRAGC,SPP1,BCL10,SORL1,SESN1,ULK1,ATG14,WIPI2,FNIP1,PIK3R4,EIF2AK3,LAMP2,SESN2,TSC1,GABARAPL1,MAPK1,RRAGD,FOXO3,GABARAP,WDR45B,KYNU,BBS4,NUAK2,MTMR3,GDF15,SSH1,TMBIM6,FOXA2,SREBF2,BCAS3,FAS,GHRL,BECN1,P2RX4
FATTY-ACYL-COA METABOLIC PROCESS%GOBP%GO:0035337	FATTY-ACYL-COA METABOLIC PROCESS%GOBP%GO:0035337	0.00753554	0.0974759	-1.75297	-1	ACOT7,ACSL4,SCD5,FASN,GCDH,FAR2,ACACA,HACD2,ELOVL6,ACSF3
CELLULAR CHEMICAL HOMEOSTASIS%GOBP%GO:0055082	CELLULAR CHEMICAL HOMEOSTASIS%GOBP%GO:0055082	0.00755599	0.0974984	1.33369	1	MT2A,MT1E,PTGER4,CCR7,CXCR3,SMAD3,CCRL2,LPAR1,CMKLR1,MT-RNR2,PSEN1,SLC31A2,HMOX1,SMAD4,CX3CR1,CHP1,CD40,CALM1,MYC,ATP6V1A,CAV2,CCR2,FTH1,FTL,CCL1,C19orf12,CCR1,ATP6V1D,CCL3,HEPH,GPR157,FBXL5,CCL23,SLC25A23,ATP6V0D1,TMEM178A,PDPK1,TFRC,ATP6AP2,RAB11B,C5AR2,MCUB,ATP6V1G1,SLC4A8,SLC9B1,RHAG,ANXA6,TPT1,GHRL,GRN,CAV1,SLC40A1,LACC1,CD55,FPR1,P2RX4,NPTN,HTT,RAB20,SLC11A2,SLC24A3,MCU,TMCO1,FLVCR1,ATP6V1C…
CELLULAR RESPONSE TO INTERLEUKIN-1%GOBP%GO:0071347	CELLULAR RESPONSE TO INTERLEUKIN-1%GOBP%GO:0071347	0.00764487	0.09812	1.46486	1	IRAK2,SQSTM1,NFKBIA,CCL3L3,IL1RN,TRAF6,TOLLIP,TAB2,CD40,CCL24,BTRC,CCL1,CCL3,MAP3K3,GBP2,CCL23,PSMD5,TANK,USP10,PELI2,RPS6KA5,MAP3K8,RC3H1,PSMD11
PURINE NUCLEOSIDE MONOPHOSPHATE BIOSYNTHETIC PROCESS%GOBP%GO:0009127	PURINE NUCLEOSIDE MONOPHOSPHATE BIOSYNTHETIC PROCESS%GOBP%GO:0009127	0.00767945	0.09812	-1.68203	-1	HK2,PPAT,ATIC,IMPDH1,LDHA,HK1,PFAS,ADSL,IMPDH2,TGFB1,TPI1,CYC1,GAPDH,PKM,PFKL,PFKM,ENO1,ENO3,ALDOA
PURINE RIBONUCLEOSIDE MONOPHOSPHATE BIOSYNTHETIC PROCESS%GOBP%GO:0009168	PURINE RIBONUCLEOSIDE MONOPHOSPHATE BIOSYNTHETIC PROCESS%GOBP%GO:0009168	0.00767945	0.09812	-1.68203	-1	HK2,PPAT,ATIC,IMPDH1,LDHA,HK1,PFAS,ADSL,IMPDH2,TGFB1,TPI1,CYC1,GAPDH,PKM,PFKL,PFKM,ENO1,ENO3,ALDOA
REGULATION OF T CELL MIGRATION%GOBP%GO:2000404	REGULATION OF T CELL MIGRATION%GOBP%GO:2000404	0.00764008	0.09812	1.73818	1	ADAM17,TMEM102,CCR2,FADD
POSITIVE REGULATION OF PROTEIN KINASE ACTIVITY%GOBP%GO:0045860	POSITIVE REGULATION OF PROTEIN KINASE ACTIVITY%GOBP%GO:0045860	0.00774079	0.098662	1.34721	1	CCR7,NCF1,CDKN1A,ADAM17,IRAK2,CD86,CRK,CHI3L1,S1PR2,TGFBR2,TRAF6,AVPI1,CD4,ARHGEF5,CCNYL1,TAB2,CARD10,CDK1,CD40,ZFP91,RIPK1,CALM1,ADRB2,INSR,TIRAP,IL18,PAK4,ADAM9,SRC,IL6R,MAPK1,FGFR1,TNFRSF10B,SNX9,PDPK1,IQGAP1,MAP2K3,RICTOR,PDCD10,DUSP5,MMD,TLR6,CRKL,TAOK1,STOX1,TLR4,TGFBR1,THBS1,MAPK14,SPAG9,GDF15,MAPKAPK2,RAPGEF1,MADD,ECT2,GHRL,RAP1A,TNFRSF11A,FPR1,MAP3K2,MAP2K7,FLT3
NEGATIVE REGULATION OF CELLULAR RESPONSE TO GROWTH FACTOR STIMULUS%GOBP%GO:0090288	NEGATIVE REGULATION OF CELLULAR RESPONSE TO GROWTH FACTOR STIMULUS%GOBP%GO:0090288	0.0078144	0.0993572	1.53643	1	SMAD3,ADAM17,SORL1,TGFBR2,ZBTB7A,CD109,SPRY1,SPRY3,FAM89B,PDPK1,TGFBR1,BCL9L,THBS1,SMURF2,SKI,GPC1,SULF2,LEMD3,TRIM33,SPRED2,CAV1,PPM1A,ZNF451,NOTCH1
RESPONSE TO REACTIVE OXYGEN SPECIES%GOBP%GO:0000302	RESPONSE TO REACTIVE OXYGEN SPECIES%GOBP%GO:0000302	0.0079403	0.100712	1.56299	1	CCR7,NCF1,ANXA1,TNFAIP3,HP,MAPK7,HMOX1,RIPK1,PLEKHA1,ADAM9,HBB,MAPK1,NFE2L2,CYP1B1,PDCD10
FOXO-MEDIATED TRANSCRIPTION%REACTOME%R-HSA-9614085.2	FOXO-MEDIATED TRANSCRIPTION%REACTOME%R-HSA-9614085.2	0.00801503	0.101168	1.61377	1	CDKN1A,SMAD3,TXNIP,CCNG2,SMAD4,CITED2,FOXO3,NFYC,YWHAZ,CAV1
REGULATION OF LIPID BIOSYNTHETIC PROCESS%GOBP%GO:0046890	REGULATION OF LIPID BIOSYNTHETIC PROCESS%GOBP%GO:0046890	0.00799571	0.101168	1.50948	1	LDLR,IDI1,ANXA1,CNEP1R1,MVK,NR1H2,C3,CD74,ASAH1,DHCR7,CHP1,ABCG1,ABCD1,HMGCR,PTGS2,HMGCS1,NFYC,SREBF2,SORBS1,FDFT1,ADIPOR1,ADIPOR2,FDPS,SC5D,LSS,ELOVL5,ERLIN2
PID_NCADHERIN_PATHWAY%MSIGDB_C2%PID_NCADHERIN_PATHWAY	PID_NCADHERIN_PATHWAY%MSIGDB_C2%PID_NCADHERIN_PATHWAY	0.00804756	0.101221	1.70495	1	CDC42,CTNNB1,CDH2,FGFR1,RAC1,CAMK2G,PIP5K1C,MAPRE1,DAGLB,CTNND1,JUP,CTNNA1
REGULATION OF PHOSPHOLIPID METABOLIC PROCESS%GOBP%GO:1903725	REGULATION OF PHOSPHOLIPID METABOLIC PROCESS%GOBP%GO:1903725	0.00805811	0.101221	1.61685	1	CCR7,LDLR,PIK3IP1,ATG14,CHP1,PIK3R4,MTMR9,MTMR3,FGFR3,FLT3,PIP4K2C,AMBRA1,WDR91
INSULIN RECEPTOR SIGNALING PATHWAY%GOBP%GO:0008286	INSULIN RECEPTOR SIGNALING PATHWAY%GOBP%GO:0008286	0.00813117	0.101595	1.54392	1	C2CD5,RHOQ,ATP6V1A,CAV2,INSR,BAIAP2,GAB1,ATP6V1D,SH2B2,ATP6V0D1,PIK3C2A,BCAR3,ATP6V1G1,SORBS1,APC,ATP6V1C1,IGF1R,ATP6V1C2
LONG-CHAIN FATTY ACID METABOLIC PROCESS%GOBP%GO:0001676	LONG-CHAIN FATTY ACID METABOLIC PROCESS%GOBP%GO:0001676	0.00816223	0.101595	-1.73782	-1	ACOT7,FADS1,ACSL4,SLC27A4,CBR1,FAAH
REGULATION OF CYTOKINESIS%GOBP%GO:0032465	REGULATION OF CYTOKINESIS%GOBP%GO:0032465	0.00816579	0.101595	1.58801	1	FLCN,CDC42,PIK3R4,CALM1,E2F7,RAB11FIP4,E2F8,SPAST,BBS4,RAB11A,KIF23,ECT2,BECN1,AURKA,PLK4,KLHL9,CETN2,RACGAP1,SH3GLB1,SETD2
RRNA MODIFICATION%GOBP%GO:0000154	RRNA MODIFICATION%GOBP%GO:0000154	0.00812266	0.101595	-1.74576	-1	THUMPD1,NAT10,MRM1,GAR1,RPUSD3,NSUN5P1,EMG1,RPUSD1,TSR3,NAF1,NSUN5P2,METTL15,METTL5,MRM3,DKC1,FTSJ3
RIBONUCLEOSIDE TRIPHOSPHATE BIOSYNTHETIC PROCESS%GOBP%GO:0009201	RIBONUCLEOSIDE TRIPHOSPHATE BIOSYNTHETIC PROCESS%GOBP%GO:0009201	0.00824584	0.102347	-1.72362	-1	HK2,CTPS1,IMPDH1,LDHA,HK1,CAD,IMPDH2,TGFB1,TPI1,CYC1,GAPDH,PKM,PFKL,PFKM,ENO1,ENO3,ALDOA
BEHAVIOR%GOBP%GO:0007610	BEHAVIOR%GOBP%GO:0007610	0.00828806	0.102626	1.46804	1	LDLR,PEX13,DYNLRB1,PSEN1,SGK1,CX3CR1,HOXA1,RGS14,ID2,INSR,TSC1,MAPK1,ITGA3,CHRNB1,BBS4,B2M,THBS1,GDF15,FOXA2,S100B,GHRL,P2RX4,HTT,PAFAH1B1
MITOCHONDRIAL TRANSMEMBRANE TRANSPORT%GOBP%GO:1990542	MITOCHONDRIAL TRANSMEMBRANE TRANSPORT%GOBP%GO:1990542	0.00834017	0.103027	-1.67141	-1	TIMM17B,SLC25A15,SLC25A22,MRPL18,SFXN4,TOMM40,SLC25A37,MRS2,ACACA,LETM1,MID1IP1,TIMM44,TIMM9,SLC25A33,TIMM23B,TIMM22,CHCHD4,TOMM40L,AFG3L2,DNAJC19,CPT1A,PNPT1,CYC1,HSPD1,MICU2,SLC25A29,SFXN2,SLC25A36,TOMM70,TIMM17A
CHEMOKINE-MEDIATED SIGNALING PATHWAY%GOBP%GO:0070098	CHEMOKINE-MEDIATED SIGNALING PATHWAY%GOBP%GO:0070098	0.00840272	0.103424	1.74508	1	CCL3L3,CCL24,CCR2,CCL1,CCR1,CCL3,CCL23
REGULATION OF INTERLEUKIN-1 PRODUCTION%GOBP%GO:0032652	REGULATION OF INTERLEUKIN-1 PRODUCTION%GOBP%GO:0032652	0.00841199	0.103424	1.55365	1	CCR7,ANXA1,TNFAIP3,CX3CR1,CCL3,TYROBP,CLEC7A,LILRA2,NLRP1,TLR4,NLRP3,GHRL,IL16,PANX1,CASP8,MEFV,LILRB4,NLRC4,CASP1,CPTP,JAK2
REGULATION OF INTERFERON-GAMMA PRODUCTION%GOBP%GO:0032649	REGULATION OF INTERFERON-GAMMA PRODUCTION%GOBP%GO:0032649	0.00860954	0.105604	1.53678	1	CCR7,HLA-DPA1,HAVCR2,HLA-DRB1,CCR2,FADD,IL18,TNFSF4,AXL,CLEC7A,TLR4,HLA-DPB1,CEBPG,TLR7,CD244,CD2,PDE4D,PTPN22,LILRB4
PROCESSING OF CAPPED INTRON-CONTAINING PRE-MRNA%REACTOME%R-HSA-72203.3	PROCESSING OF CAPPED INTRON-CONTAINING PRE-MRNA%REACTOME%R-HSA-72203.3	0.00863206	0.105631	-1.46616	-1	ELAVL1,HNRNPD,SRSF7,SNRNP35,HNRNPU,NUP107,CPSF1,PCF11,TRA2B,SNRPD3,MAGOHB,SRSF1,DDX39A,POLR2K,U2SURP,FUS,PRPF31,NUP50,NUP43,CPSF3,HSPA8,GCFC2,SYMPK,DDX39B,SRSF10,NCBP1,POLR2H,NUP155,HNRNPF,CWC27,U2AF1,POLR2C,DDX42,THOC3,SRSF5,THOC6,THOC1,CTNNBL1,SRRT,PPIE,NXT1,SF3A3,LSM2,SRRM2,SNRPA1,SNU13,DHX38,SNRPA,SNRPF,SNRPE,SRSF3,NUP210,PRPF19,ZRSR2,DDX5,SRSF2,SF3A2,SRSF9,GPKOW,HNRNPL,HNRNPR
REGULATION OF PHOSPHATIDYLINOSITOL 3-KINASE ACTIVITY%GOBP%GO:0043551	REGULATION OF PHOSPHATIDYLINOSITOL 3-KINASE ACTIVITY%GOBP%GO:0043551	0.00869498	0.106152	1.69831	1	CCR7,PIK3IP1,ATG14,PIK3R4,FGFR3,FLT3,AMBRA1,WDR91
AMINO ACID TRANSPORT%GOBP%GO:0006865	AMINO ACID TRANSPORT%GOBP%GO:0006865	0.0088152	0.106621	-1.73297	-1	SLC25A15,SLC43A1,SLC25A22,TSPOAP1,SLC7A1,SLC38A5,SLC38A9,VAMP2,SLC7A5,SLC1A5,GLS,PPFIA3,SLC38A10,SLC3A2,SLC38A1
FIBRIN COMPLEMENT RECEPTOR 3 SIGNALING PATHWAY%WIKIPATHWAYS_20201210%WP4136%HOMO SAPIENS	FIBRIN COMPLEMENT RECEPTOR 3 SIGNALING PATHWAY%WIKIPATHWAYS_20201210%WP4136%HOMO SAPIENS	0.00880856	0.106621	1.70743	1	IRAK2,TRAF6,TICAM1,TIRAP,SRC,TYROBP,TLR4
POSITIVE REGULATION OF ADAPTIVE IMMUNE RESPONSE BASED ON SOMATIC RECOMBINATION OF IMMUNE RECEPTORS BUILT FROM IMMUNOGLOBULIN SUPERFAMILY DOMAINS%GOBP%GO:0002824	POSITIVE REGULATION OF ADAPTIVE IMMUNE RESPONSE BASED ON SOMATIC RECOMBINATION OF IMMUNE RECEPTORS BUILT FROM IMMUNOGLOBULIN SUPERFAMILY DOMAINS%GOBP%GO:0002824	0.00876751	0.106621	1.54808	1	ANXA1,HLA-DRA,TRAF6,FBXO38,HLA-DRB1,ZBTB1,CD40,CCR2,FADD,IL18,TNFSF4,TFRC,B2M,NLRP3,SOCS5,KMT5B
POSITIVE REGULATION OF ADAPTIVE IMMUNE RESPONSE%GOBP%GO:0002821	POSITIVE REGULATION OF ADAPTIVE IMMUNE RESPONSE%GOBP%GO:0002821	0.00880857	0.106621	1.52727	1	ANXA1,HLA-DRA,TRAF6,FBXO38,HLA-DRB1,ZBTB1,CD40,CCR2,FADD,IL18,TNFSF4,TFRC,B2M,NLRP3,SOCS5,KMT5B
CELLULAR RESPONSE TO HORMONE STIMULUS%GOBP%GO:0032870	CELLULAR RESPONSE TO HORMONE STIMULUS%GOBP%GO:0032870	0.00891072	0.106794	1.35365	1	PTGER4,ANXA1,SPP1,NR4A2,TFPI,KDM3A,RARG,AR,RAB12,C2CD5,RHOQ,ATP6V1A,CAV2,UGCG,INSR,BAIAP2,GAB1,PLPP1,ATP6V1D,TNFSF4,SH2B2,NR4A1,SRC,ATP6V0D1,PIK3C2A,LATS1,BCAR3,RDX,PDPK1,CAMK2A,BBS4,RBFOX2,ZFP36L2,PDE3B,ATP6V1G1,INSIG2,GNG2,FAM210B,SORBS1,GHRL,ADIPOR1,CAV1,RAB13,ADIPOR2,APC,PPARD,NOTCH1,ADCY7,ATP6V1C1,TRIP4,IGF1R,ATP6V1C2,LYN,MYO5A,CTSB
GLYCERALDEHYDE-3-PHOSPHATE METABOLIC PROCESS%GOBP%GO:0019682	GLYCERALDEHYDE-3-PHOSPHATE METABOLIC PROCESS%GOBP%GO:0019682	0.00893063	0.106794	-1.81134	-1	RPIA
HALLMARK_INTERFERON_ALPHA_RESPONSE%MSIGDB_C2%HALLMARK_INTERFERON_ALPHA_RESPONSE	HALLMARK_INTERFERON_ALPHA_RESPONSE%MSIGDB_C2%HALLMARK_INTERFERON_ALPHA_RESPONSE	0.00895581	0.106794	1.53886	1	IFIT2,TXNIP,HELZ2,CCRL2,CD74,IFIT3,TRIM21,MX1,GBP2,IRF7,LGALS3BP,IRF1,RTP4,B2M,GMPR,TRAFD1,GBP4
MRNA SPLICING, VIA SPLICEOSOME%GOBP%GO:0000398	MRNA SPLICING, VIA SPLICEOSOME%GOBP%GO:0000398	0.00900386	0.106794	-1.41143	-1	ELAVL1,HNRNPD,SRSF7,RAVER2,SNRNP35,HNRNPU,CPSF1,PCF11,TRA2B,SYNCRIP,SNRPD3,MAGOHB,SRSF1,DDX39A,POLR2K,U2SURP,FUS,PRPF31,PRMT7,PNN,RBM6,CLNS1A,CPSF3,RBM4,HSPA8,PRMT5,GCFC2,SYMPK,DDX39B,SRPK2,SRSF10,CACTIN,SRSF8,RBM10,NCBP1,SRSF12,POLR2H,HNRNPF,DDX17,CWC27,U2AF1,POLR2C,DDX42,PSIP1,SRSF5,SCNM1,PRPF40B,CTNNBL1,SRRT,GEMIN7,PPIE,SF3A3,RBM19,SRPK1,GEMIN5,LSM2,SRRM2,SNRPA1,SNU13,DDX41,DHX38,LUC7L3,SNRPA,…
POSITIVE REGULATION OF EPITHELIAL TO MESENCHYMAL TRANSITION%GOBP%GO:0010718	POSITIVE REGULATION OF EPITHELIAL TO MESENCHYMAL TRANSITION%GOBP%GO:0010718	0.00900316	0.106794	1.67246	1	SMAD3,SDCBP,TGFBR2,CTNNB1,ACVR1,SMAD4,TGFBR1,BCL9L,WWTR1,NOTCH1,DAB2
POSITIVE REGULATION OF JNK CASCADE%GOBP%GO:0046330	POSITIVE REGULATION OF JNK CASCADE%GOBP%GO:0046330	0.0090139	0.106794	1.51715	1	CCR7,NCF1,SDCBP,TRAF6,ARHGEF5,FCGR2B,RIPK1,TIRAP,SLAMF1,ZNF622,TLR6,TAOK1,SPAG9,TNFRSF11A,MAP3K2,MAP2K7
REGULATION OF T CELL MEDIATED IMMUNITY%GOBP%GO:0002709	REGULATION OF T CELL MEDIATED IMMUNITY%GOBP%GO:0002709	0.0089817	0.106794	1.56046	1	HLA-DRA,TRAF6,FBXO38,HLA-DRB1,ZBTB1,FCGR2B,CCR2,FADD,IL18,TNFSF4,TNFRSF1B,B2M,NLRP3
RNA SPLICING, VIA TRANSESTERIFICATION REACTIONS WITH BULGED ADENOSINE AS NUCLEOPHILE%GOBP%GO:0000377	RNA SPLICING, VIA TRANSESTERIFICATION REACTIONS WITH BULGED ADENOSINE AS NUCLEOPHILE%GOBP%GO:0000377	0.00900386	0.106794	-1.41143	-1	ELAVL1,HNRNPD,SRSF7,RAVER2,SNRNP35,HNRNPU,CPSF1,PCF11,TRA2B,SYNCRIP,SNRPD3,MAGOHB,SRSF1,DDX39A,POLR2K,U2SURP,FUS,PRPF31,PRMT7,PNN,RBM6,CLNS1A,CPSF3,RBM4,HSPA8,PRMT5,GCFC2,SYMPK,DDX39B,SRPK2,SRSF10,CACTIN,SRSF8,RBM10,NCBP1,SRSF12,POLR2H,HNRNPF,DDX17,CWC27,U2AF1,POLR2C,DDX42,PSIP1,SRSF5,SCNM1,PRPF40B,CTNNBL1,SRRT,GEMIN7,PPIE,SF3A3,RBM19,SRPK1,GEMIN5,LSM2,SRRM2,SNRPA1,SNU13,DDX41,DHX38,LUC7L3,SNRPA,…
ZINC ION TRANSPORT%GOBP%GO:0006829	ZINC ION TRANSPORT%GOBP%GO:0006829	0.00894839	0.106794	-1.82085	-1	SLC39A10,TRPM2,SLC39A14,SLC30A1
BIOCARTA_VEGF_PATHWAY%MSIGDB_C2%BIOCARTA_VEGF_PATHWAY	BIOCARTA_VEGF_PATHWAY%MSIGDB_C2%BIOCARTA_VEGF_PATHWAY	0.00913559	0.107991	-1.79722	-1	ELAVL1,EIF2S3,EIF2B3,FLT4,VHL,EIF2S1,EIF2B1
BIOCARTA_FMLP_PATHWAY%MSIGDB_C2%BIOCARTA_FMLP_PATHWAY	BIOCARTA_FMLP_PATHWAY%MSIGDB_C2%BIOCARTA_FMLP_PATHWAY	0.00921477	0.108565	1.6718	1	NCF1,NFKBIA,MAPK1,NFATC1,NCF2,RAC1,MAP2K3,MAPK14,FPR1
L-ALPHA-AMINO ACID TRANSMEMBRANE TRANSPORT%GOBP%GO:1902475	L-ALPHA-AMINO ACID TRANSMEMBRANE TRANSPORT%GOBP%GO:1902475	0.00922585	0.108565	-1.81654	-1	SLC25A15,SLC25A22,SLC7A1,SLC38A5,SLC7A5,SLC1A5,SLC3A2,SLC38A1
SULFUR COMPOUND BIOSYNTHETIC PROCESS%GOBP%GO:0044272	SULFUR COMPOUND BIOSYNTHETIC PROCESS%GOBP%GO:0044272	0.0093113	0.109324	-1.57492	-1	B4GAT1,ACSL4,ANGPT1,GSTO1,SCD5,SLC26A2,GGCT,MAT2A,HAGH,FASN,GCDH,ST3GAL4,CHST11,ACACA,B3GNT2,MTHFD1,LIAS,HACD2,GGT5,B3GNT7,ELOVL6,PDHA1,ACSF3
CLEAVAGE INVOLVED IN RRNA PROCESSING%GOBP%GO:0000469	CLEAVAGE INVOLVED IN RRNA PROCESSING%GOBP%GO:0000469	0.00936459	0.109702	-1.81033	-1	EXOSC8,NOP9,TSR1,RCL1,EXOSC2,UTP20,RRS1,KRI1,TBL3,EXOSC7,BMS1,RPP40
POSITIVE REGULATION OF INTERLEUKIN-12 PRODUCTION%GOBP%GO:0032735	POSITIVE REGULATION OF INTERLEUKIN-12 PRODUCTION%GOBP%GO:0032735	0.00941084	0.109997	1.6928	1	CCR7,CD40,TIRAP,TNFSF4,CLEC7A,TLR4,MAPK14,IL16
RNA SPLICING%GOBP%GO:0008380	RNA SPLICING%GOBP%GO:0008380	0.00945779	0.110052	-1.43847	-1	ELAVL1,HNRNPD,SRSF7,RAVER2,FAM98B,SNRNP35,HNRNPU,IVNS1ABP,CPSF1,PCF11,TRA2B,SYNCRIP,SNRPD3,PPP1R9B,MAGOHB,SRSF1,DDX39A,POLR2K,U2SURP,FUS,PRPF31,PRMT7,PNN,RBM6,CLNS1A,MPHOSPH10,CPSF3,RBM4,HSPA8,PRMT5,GCFC2,SYMPK,DDX39B,MBNL1,SRPK2,SRSF10,CACTIN,SRSF8,RBM10,NCBP1,SRSF12,POLR2H,HNRNPF,DDX17,ZBTB8OS,CWC27,U2AF1,POLR2C,DDX42,TSEN54,PSIP1,SRSF5,SCNM1,PRPF40B,CTNNBL1,SRRT,GEMIN7,PPIE,TSEN2,SF3A3,RBM19,S…
VASCULAR ENDOTHELIAL GROWTH FACTOR RECEPTOR SIGNALING PATHWAY%GOBP%GO:0048010	VASCULAR ENDOTHELIAL GROWTH FACTOR RECEPTOR SIGNALING PATHWAY%GOBP%GO:0048010	0.00944229	0.110052	1.56673	1	NCF1,CRK,CDC42,ELMO2,NCK1,BAIAP2,SRC,AXL,NCF2,RAC1,WASF2,MAPK14,MAPKAPK2,ABI1,BRK1,CYBB,ITGAV
VITAMIN B12 METABOLISM%WIKIPATHWAYS_20201210%WP1533%HOMO SAPIENS	VITAMIN B12 METABOLISM%WIKIPATHWAYS_20201210%WP1533%HOMO SAPIENS	0.00957177	0.111131	1.69089	1	LDLR,ABCA1,INSR,HBB,NFKB2
NUCLEAR RECEPTORS META-PATHWAY%WIKIPATHWAYS_20201210%WP2882%HOMO SAPIENS	NUCLEAR RECEPTORS META-PATHWAY%WIKIPATHWAYS_20201210%WP2882%HOMO SAPIENS	0.00965801	0.111883	1.43226	1	CDKN1C,ALOX5AP,TNFAIP3,ALAS1,THBD,SQSTM1,TGFBR2,ARL5B,RGS2,HMOX1,DBI,DNAJB1,MGST3,ABCB1,MYC,FTH1,FTL,SPRY1,SLC2A3,BIRC3,SRC,JUNB,SERTAD2,NFE2L2,SLC39A9,CYP1B1,SRGN,NQO1,PTGS2,NFKB2,SLC6A8,GPR153
RNA MODIFICATION%GOBP%GO:0009451	RNA MODIFICATION%GOBP%GO:0009451	0.00969641	0.112078	-1.54154	-1	THUMPD1,NAT10,CTU2,TRIT1,MRM1,DUS2,ADAR,GAR1,AARS2,RPUSD3,TRMT61A,PUS1,TRMT1,PUS7L,METTL1,TARBP1,NSUN6,FTO,ANKRD16,NSUN5P1,TRMU,QTRT1,FTSJ1,EMG1,RPUSD1,ADAT2,DPH3,TSR3,NAF1,NSUN5P2,NSUN2,CDKAL1,METTL15
DETOXIFICATION%GOBP%GO:0098754	DETOXIFICATION%GOBP%GO:0098754	0.00985516	0.112183	1.71856	1	MT2A,MT1E,SESN1,SESN2
ENDOCRINE SYSTEM DEVELOPMENT%GOBP%GO:0035270	ENDOCRINE SYSTEM DEVELOPMENT%GOBP%GO:0035270	0.00989917	0.112183	1.68898	1	ANXA1,EIF2AK3,CDH2,CITED2,RFX3,IL6R,TGFBR1,FOXA2
ENDOTHELIAL CELL DEVELOPMENT%GOBP%GO:0001885	ENDOTHELIAL CELL DEVELOPMENT%GOBP%GO:0001885	0.00979632	0.112183	1.63865	1	ICAM1,PPP1R16B,PECAM1,RDX,RAP1B,F11R,RAP2C,RAPGEF1,RAP1A,RAB1A,MYADM,PDE4D,RAB1B,RAP2B,EZR,RAPGEF2,SOX18
G PROTEIN-COUPLED RECEPTOR SIGNALING PATHWAY%GOBP%GO:0007186	G PROTEIN-COUPLED RECEPTOR SIGNALING PATHWAY%GOBP%GO:0007186	0.00980861	0.112183	1.37288	1	PTGER4,CCR7,CXCR3,ANXA1,SORL1,ABCA1,S1PR2,C3,CCL3L3,LPAR1,CMKLR1,MT-RNR2,ADGRD1,GPR183,RGS2,RGS1,CX3CR1,ARHGEF5,RGS14,ADGRE5,PSAP,CALM1,CCL24,ADRB2,CCR2,GNA12,INSR,CCL1,PLPP1,CCR1,CCL3,GPR157,SOS2,SRC,GPR171,CCL23,BCAR3,RAC1,ARHGEF3,CAMK2A,GNB5,CALCRL,GNG7,CNR2,GNA13,ADGRG5,APLP2,C5AR2,WASF2,PDE3B,ADORA3,GNG5,ARHGEF7,GNG2,ECT2,AKAP5,GHRL,FGD4,GNAI3,CAV1,RHOC,ADGRE1,FPR1,GNAS,RGS12,GNAI2,LANCL1,AD…
MITOCHONDRIAL OUTER MEMBRANE PERMEABILIZATION INVOLVED IN PROGRAMMED CELL DEATH%GOBP%GO:1902686	MITOCHONDRIAL OUTER MEMBRANE PERMEABILIZATION INVOLVED IN PROGRAMMED CELL DEATH%GOBP%GO:1902686	0.00986551	0.112183	1.72736	1	BMF,BNIP3L,ATF2,PPIF
MRNA SPLICING%REACTOME DATABASE ID RELEASE 75%72172	MRNA SPLICING%REACTOME DATABASE ID RELEASE 75%72172	0.00974302	0.112183	-1.50273	-1	ELAVL1,HNRNPD,SRSF7,SNRNP35,HNRNPU,CPSF1,PCF11,TRA2B,SNRPD3,MAGOHB,SRSF1,POLR2K,U2SURP,FUS,PRPF31,CPSF3,HSPA8,GCFC2,SYMPK,SRSF10,NCBP1,POLR2H,HNRNPF,CWC27,U2AF1,POLR2C,DDX42,SRSF5,CTNNBL1,SRRT,PPIE,SF3A3,LSM2,SRRM2,SNRPA1,SNU13,DHX38,SNRPA,SNRPF,SNRPE,SRSF3,PRPF19,ZRSR2,DDX5,SRSF2,SF3A2,SRSF9,GPKOW,HNRNPL,HNRNPR
NEGATIVE REGULATION OF CYCLIN-DEPENDENT PROTEIN KINASE ACTIVITY%GOBP%GO:1904030	NEGATIVE REGULATION OF CYCLIN-DEPENDENT PROTEIN KINASE ACTIVITY%GOBP%GO:1904030	0.00980742	0.112183	1.70274	1	CDKN1C,CDKN1A,LATS1,APC
PID_MYC_ACTIV_PATHWAY%MSIGDB_C2%PID_MYC_ACTIV_PATHWAY	PID_MYC_ACTIV_PATHWAY%MSIGDB_C2%PID_MYC_ACTIV_PATHWAY	0.00985994	0.112183	-1.71691	-1	MTDH,TAF12,TAF4B,KAT2A,EIF4A1,CCND2,PIM1,RUVBL1,EIF4G1,CAD,EIF2S1,MMP9,PMAIP1,NCL,RUVBL2,NME2,UBTF,FOSL1
REGULATION OF TRANS-SYNAPTIC SIGNALING%GOBP%GO:0099177	REGULATION OF TRANS-SYNAPTIC SIGNALING%GOBP%GO:0099177	0.00988842	0.112183	-1.53397	-1	ITGB1,ADGRB1,SNCA,FMR1,GRIK5,TPRG1L,SYNGAP1,NCDN,KAT2A,HOMER1,DLGAP3,SLC12A2,GRM4,KCNMB4,VAMP2,SHANK1,MAP1A,SHANK3,SLC30A1,PPFIA3,ANAPC2,PPP3CB,AKAP9,TMEM25
PROTEIN UBIQUITINATION%GOBP%GO:0016567	PROTEIN UBIQUITINATION%GOBP%GO:0016567	0.009943	0.112436	1.30311	1	KLHL24,MDM2,TNFAIP3,PEX13,DTX2,TNFAIP1,BCL10,RNF4,TRIM38,RNF19B,CNOT4,RNF41,TRAF6,FBXO38,FBXL3,RNF111,KLHL20,RNF122,CTNNB1,MKRN1,TRIM36,CCNF,RNF34,RNF185,TRIM4,RNF6,ZFP91,RNF38,BTRC,ANAPC13,RYBP,ASB2,CBL,DCAF15,TRIM21,TRIM62,RNF146,FBXL5,ARRDC4,DTL,WSB1,AKTIP,NFE2L2,TRIM37,AREL1,PSMD5,KLHL18,PELI2,OTULIN,KCTD10,WWP2,KLHL3,FBXL18,FBXO45,SMURF2,RNF13,DTX3L,UBE2W,RFWD3,UBOX5,RNF144A,PEX12,DDB2,FBXL4…
REGULATION OF ADAPTIVE IMMUNE RESPONSE BASED ON SOMATIC RECOMBINATION OF IMMUNE RECEPTORS BUILT FROM IMMUNOGLOBULIN SUPERFAMILY DOMAINS%GOBP%GO:0002822	REGULATION OF ADAPTIVE IMMUNE RESPONSE BASED ON SOMATIC RECOMBINATION OF IMMUNE RECEPTORS BUILT FROM IMMUNOGLOBULIN SUPERFAMILY DOMAINS%GOBP%GO:0002822	0.0100157	0.112769	1.55473	1	ANXA1,TNFAIP3,HLA-DRA,TRAF6,FBXO38,HLA-DRB1,ZBTB1,CD40,FCGR2B,CCR2,FADD,IL18,TNFSF4,TFRC,TNFRSF1B,B2M,NLRP3,SOCS5,KMT5B,RC3H2,RC3H1,SLC15A4
REGULATION OF PROTEIN COMPLEX ASSEMBLY%GOBP%GO:0043254	REGULATION OF PROTEIN COMPLEX ASSEMBLY%GOBP%GO:0043254	0.00999986	0.112769	1.30789	1	PTGER4,CCR7,BMF,CDC42EP4,SORL1,RNF4,ABCA1,CDC42,TPPP,ULK1,CTTN,CTNNB1,TWF1,FNIP1,PRUNE1,CCL24,NCK1,SLAIN2,BAIAP2,TIRAP,AIDA,HSPA1B,SRC,CLIP1,MTPN,HJURP,SNX9,LATS1,RAP1B,RAC1,TFIP11,STMN1,SSH2,SUB1,TFRC,CLEC7A,ANKRA2,CAPZA1,TLR6,SLF1,TLR4,GBP5,ARFIP1,WASF2,ACTR2,CNOT6,SSH1,DDB2,SLF2,RHOC,ERCC4,G3BP2,ARPC2,PPM1A,ZNF451,MED14,TMSB10,MYADM,MAPRE1,VPS18,CAPZB,ADD3,BRK1,LGALS3,MECP2,SMAD6,SH3GLB1,CARMI…
REGULATION OF CD4-POSITIVE, ALPHA-BETA T CELL ACTIVATION%GOBP%GO:2000514	REGULATION OF CD4-POSITIVE, ALPHA-BETA T CELL ACTIVATION%GOBP%GO:2000514	0.0101115	0.113582	1.61571	1	ANXA1,HLA-DRA,MYB,CD86,TGFBR2,HLA-DRB1,IL18,TNFSF4,SOCS1,NLRP3,SOCS5,RC3H2,CD55,RC3H1,IRF4
RNA SPLICING, VIA TRANSESTERIFICATION REACTIONS%GOBP%GO:0000375	RNA SPLICING, VIA TRANSESTERIFICATION REACTIONS%GOBP%GO:0000375	0.0101448	0.113582	-1.42083	-1	ELAVL1,HNRNPD,SRSF7,RAVER2,SNRNP35,HNRNPU,CPSF1,PCF11,TRA2B,SYNCRIP,SNRPD3,MAGOHB,SRSF1,DDX39A,POLR2K,U2SURP,FUS,PRPF31,PRMT7,PNN,RBM6,CLNS1A,MPHOSPH10,CPSF3,RBM4,HSPA8,PRMT5,GCFC2,SYMPK,DDX39B,SRPK2,SRSF10,CACTIN,SRSF8,RBM10,NCBP1,SRSF12,POLR2H,HNRNPF,DDX17,CWC27,U2AF1,POLR2C,DDX42,PSIP1,SRSF5,SCNM1,PRPF40B,CTNNBL1,SRRT,GEMIN7,PPIE,SF3A3,RBM19,SRPK1,GEMIN5,LSM2,SRRM2,SNRPA1,SNU13,DDX41,DHX38,LUC…
SYNTHESIS OF PIPS AT THE PLASMA MEMBRANE%REACTOME%R-HSA-1660499.6	SYNTHESIS OF PIPS AT THE PLASMA MEMBRANE%REACTOME%R-HSA-1660499.6	0.0101533	0.113582	1.59905	1	PLEKHA2,SYNJ2,PI4K2A,RAB5A,MTMR9,PLEKHA1,PLEKHA3,OCRL,PIK3C2A,MTMR6,PIP5K1C,MTMR3,PIK3C2B,RAB14,MTM1,PIP4K2C,PIP5K1A
LYMPHOCYTE DIFFERENTIATION%GOBP%GO:0030098	LYMPHOCYTE DIFFERENTIATION%GOBP%GO:0030098	0.0102099	0.113971	1.49524	1	PTGER4,ANXA1,ADAM17,CD74,GPR183,ZBTB7A,CD4,FNIP1,SOX13,RELB,LFNG,FCGR2B,DNAJB9,FADD,LRRC8A,AXL
REGULATION OF AMINE TRANSPORT%GOBP%GO:0051952	REGULATION OF AMINE TRANSPORT%GOBP%GO:0051952	0.0103908	0.115742	-1.78327	-1	ITGB1,SLC43A1,SNCA,SLC12A2
NEGATIVE REGULATION OF CELL PROLIFERATION%GOBP%GO:0008285	NEGATIVE REGULATION OF CELL PROLIFERATION%GOBP%GO:0008285	0.0104271	0.115898	1.33444	1	BTG2,CDKN1C,CDKN1A,DUSP10,TNFAIP3,FLCN,CD86,S100A11,TOB1,MN1,CCL3L3,MORC3,TMEM127,RNF41,HLA-DRB1,CTNNB1,RARG,AR,HMOX1,ZBTB49,SDC4,FCGR2B,PDCD4,IGFBP7,MYC,IFIT3,E2F7,CAV2,FTH1,VGLL4,TSC1,PLPP1,CTNNBIP1,HSPA1B,MTSS1,CCL23,DLG5,CD164,TYROBP,TRIB1,E2F3,CYP1B1,PDCD10,ING4,IRF1,ZNF268,KANK2,B2M,BRCA2,ATF5,THBS1,PPM1D,ADORA3,SFTPD,SKI,GATA2,ATRAID,KDM2B,GHRL,CAV1,APC,PPP2R5C,RC3H1,KRIT1
GRANULOCYTE MIGRATION%GOBP%GO:0097530	GRANULOCYTE MIGRATION%GOBP%GO:0097530	0.0105233	0.116089	1.6323	1	ANXA1,CCL3L3,PECAM1,CCL24,CCL1,CCL3,CCL23,GBF1,PIP5K1C,UMODL1
HEMOPOIESIS%GOBP%GO:0030097	HEMOPOIESIS%GOBP%GO:0030097	0.0105333	0.116089	1.34821	1	PTGER4,CCR7,ANXA2,OSTM1,ANXA1,ADAM17,FLCN,ALAS1,TGFBR2,RRAS,CDC42,CD74,GPR183,ZBTB7A,HLA-DRB1,CD4,FNIP1,SOX13,RELB,LFNG,FCGR2B,DNAJB9,FADD,EVI2B,TIRAP,LRRC8A,SRC,AXL,CD164,TYROBP,KITLG,MELK,TET2,SLC25A38,ZFP36L2,RASGRP4,CEBPG,MAPK14,DMTN,GATA2,PLD4
NUCLEOTIDE METABOLISM%REACTOME DATABASE ID RELEASE 75%15869	NUCLEOTIDE METABOLISM%REACTOME DATABASE ID RELEASE 75%15869	0.0104689	0.116089	-1.63607	-1	PPAT,CTPS1,DHODH,GLRX,ATIC,IMPDH1,TXNRD1,CMPK1,PFAS,ADAL,CAD,NT5M,ADSL,IMPDH2,RRM2B,NME2,DCTPP1,ENTPD7,PNP,NME1
TRNA PROCESSING%GOBP%GO:0008033	TRNA PROCESSING%GOBP%GO:0008033	0.0105129	0.116089	-1.59945	-1	THUMPD1,FAM98B,CTU2,TRIT1,DUS2,AARS2,CPSF1,TRMT61A,PUS1,TRMT1,POP5,METTL1,TARBP1,RPP25,NSUN6,ANKRD16,TRMU,QTRT1,FTSJ1,RPP25L,ELAC2,ADAT2,DPH3,FARS2,NSUN2,ZBTB8OS,CDKAL1,TSEN54,TYW1,RPP40,MTFMT,OSGEP,METTL2B,TSEN2,POP4
MRNA PROCESSING%GOBP%GO:0006397	MRNA PROCESSING%GOBP%GO:0006397	0.0106075	0.116297	-1.40539	-1	ELAVL1,HNRNPD,SRSF7,RAVER2,CCNH,SNRNP35,HNRNPU,RNMT,CPSF1,PCF11,TRA2B,SYNCRIP,SNRPD3,MAGOHB,GTF2H3,SRSF1,ERCC2,DDX39A,POLR2K,U2SURP,FUS,PRPF31,PRMT7,PNN,RBM6,CLNS1A,CPSF3,RBM4,HSPA8,PRMT5,GCFC2,SYMPK,DDX39B,SRPK2,GTF2H2,SRSF10,CACTIN,SRSF8,RBM10,NCBP1,SRSF12,POLR2H,HNRNPF,DDX17,CWC27,U2AF1,POLR2C,MTPAP,DDX42,THOC3,PNPT1,PSIP1,SRSF5,SCNM1,THOC6,THOC1,PRPF40B,CTNNBL1,SRRT,GEMIN7,AHCYL1,PPIE,SF3A3,R…
NUCLEOCYTOPLASMIC TRANSPORT%GOBP%GO:0006913	NUCLEOCYTOPLASMIC TRANSPORT%GOBP%GO:0006913	0.0106032	0.116297	-1.45193	-1	SRSF7,PHAX,XPOT,ANKLE1,RITA1,NOP9,XPO5,HEATR3,NUP107,DESI1,CPSF1,KPNB1,HTATIP2,NOL6,SNRPD3,MAGOHB,SRSF1,DDX39A,XPO6,XPO1,XPO4,NUP50,NUP43,SEH1L,CPSF3,TGFB1,RRS1,TSC2,SYMPK,DDX39B,NCBP1,TNPO1,IPO13,ANP32A,NUP155,TNPO2,NEMF,FAM53B,SMG7,U2AF1,IPO5,TNPO3,THOC3,SRSF5,LTV1,THOC6,THOC1,MCM3AP,RANBP6,GEMIN7,ABCE1,RAN,NXT1,PCID2,CCHCR1,GEMIN5,DDX19A,RANBP17,DHX38,SNRPF,SNRPE,SRSF3,NUP210,PPP1R10,STRADB
ZBP1(DAI) MEDIATED INDUCTION OF TYPE I IFNS%REACTOME%R-HSA-1606322.1	ZBP1(DAI) MEDIATED INDUCTION OF TYPE I IFNS%REACTOME%R-HSA-1606322.1	0.0106191	0.116297	1.70625	1	NFKBIA,TICAM1,RIPK1,NFKB2,NKIRAS2,NKIRAS1,TBK1
MYD88-INDEPENDENT TLR4 CASCADE%REACTOME DATABASE ID RELEASE 75%166166	MYD88-INDEPENDENT TLR4 CASCADE%REACTOME DATABASE ID RELEASE 75%166166	0.0107556	0.117054	1.50785	1	IRAK2,NFKBIA,ATF2,MAPK7,TRAF6,TAB2,TICAM1,RIPK1,FADD,BTRC,BIRC3,MAPK1,IRF7,MAP2K3,TANK,PPP2CB,MEF2A,TLR4,NFKB2,RPS6KA5,MAPK14,NKIRAS2,MAPKAPK2,NKIRAS1,S100B,MAP3K8,MAP2K7
NUCLEAR RECEPTOR TRANSCRIPTION PATHWAY%REACTOME DATABASE ID RELEASE 75%383280	NUCLEAR RECEPTOR TRANSCRIPTION PATHWAY%REACTOME DATABASE ID RELEASE 75%383280	0.0107408	0.117054	1.71488	1	NRBP1,NR4A2,NR1H2,RARG,AR,NR4A1,NR2C1,PPARD
TRIF(TICAM1)-MEDIATED TLR4 SIGNALING%REACTOME%R-HSA-937061.2	TRIF(TICAM1)-MEDIATED TLR4 SIGNALING%REACTOME%R-HSA-937061.2	0.0107556	0.117054	1.50785	1	IRAK2,NFKBIA,ATF2,MAPK7,TRAF6,TAB2,TICAM1,RIPK1,FADD,BTRC,BIRC3,MAPK1,IRF7,MAP2K3,TANK,PPP2CB,MEF2A,TLR4,NFKB2,RPS6KA5,MAPK14,NKIRAS2,MAPKAPK2,NKIRAS1,S100B,MAP3K8,MAP2K7
ENDOMEMBRANE SYSTEM ORGANIZATION%GOBP%GO:0010256	ENDOMEMBRANE SYSTEM ORGANIZATION%GOBP%GO:0010256	0.0110108	0.119581	1.30952	1	CNEP1R1,ABCA1,SQSTM1,CDC42,TMEM170A,RAB18,ARL6IP1,LYSMD3,PLSCR4,CDK1,ATL3,EIF2AK3,PI4K2A,OPTN,GOLGA5,DNAJC28,CAV2,UGCG,IST1,CHMP3,VPS37A,ABCD1,STX6,RAB2A,GOLPH3L,CHMP2B,TMED4,AKTIP,SNX9,TBC1D20,NEMP1,RAB22A,MOSPD3,GBF1,PDCD10,TRAM2,SPAST,SRGN,SMPD1,FNBP1L,RAB11A,TJAP1,CSNK1D,YWHAZ,CHMP1B,ARHGEF7,OSBPL2,TMED10,GORASP2,ANXA6,BCAS3,STAM,LEMD3,FAM160A2,CAV1,PLEKHF1,RAB1A,ATL1,HTT,STAM2,PAFAH1B1,VAMP4…
MAPK SIGNALING PATHWAY%WIKIPATHWAYS_20201210%WP382%HOMO SAPIENS	MAPK SIGNALING PATHWAY%WIKIPATHWAYS_20201210%WP382%HOMO SAPIENS	0.0112125	0.120269	1.44904	1	DUSP10,CRK,ATF2,TGFBR2,RRAS,CDC42,MAPK7,TRAF6,RELB,MYC,SOS2,MAPK1,NFATC1,FGFR1,RAC1,MAP2K3,CRKL,TAOK1,TGFBR1,NFKB2,LAMTOR3,RASGRP4,RPS6KA5,MAPK14,MAPKAPK2,FGFR3,MAP3K8,RAP1A,CACNA2D4,MAP3K2
NUCLEAR TRANSPORT%GOBP%GO:0051169	NUCLEAR TRANSPORT%GOBP%GO:0051169	0.011117	0.120269	-1.44411	-1	SRSF7,PHAX,XPOT,ANKLE1,RITA1,NOP9,XPO5,HEATR3,NUP107,DESI1,CPSF1,KPNB1,HTATIP2,NOL6,SNRPD3,MAGOHB,SRSF1,DDX39A,XPO6,XPO1,XPO4,NUP50,NUP43,SEH1L,CPSF3,TGFB1,RRS1,TSC2,SYMPK,DDX39B,NCBP1,TNPO1,IPO13,ANP32A,NUP155,TNPO2,NEMF,FAM53B,SMG7,U2AF1,IPO5,TNPO3,THOC3,PSIP1,SRSF5,LTV1,THOC6,THOC1,MCM3AP,RANBP6,GEMIN7,ABCE1,RAN,NXT1,PCID2,CCHCR1,GEMIN5,DDX19A,RANBP17,DHX38,SNRPF,SNRPE,SRSF3,NUP210,PPP1R10,STR…
SIGNALING BY ERBB4%REACTOME DATABASE ID RELEASE 75%1236394	SIGNALING BY ERBB4%REACTOME DATABASE ID RELEASE 75%1236394	0.0112007	0.120269	1.57405	1	ADAM17,PSEN1,MXD4,TAB2,SRC,STMN1,PSENEN,S100B,NCSTN,APH1A
STRUCTURAL PATHWAY OF INTERLEUKIN 1 (IL-1)%WIKIPATHWAYS_20201210%WP2637%HOMO SAPIENS	STRUCTURAL PATHWAY OF INTERLEUKIN 1 (IL-1)%WIKIPATHWAYS_20201210%WP2637%HOMO SAPIENS	0.0111892	0.120269	1.64198	1	IRAK2,NFKBIA,ATF2,TRAF6,MYC,MAPK1,IRF7,MAP2K3,TANK,RPS6KA5,MAPK14,MAPKAPK2,MAP3K8
TBC RABGAPS%REACTOME%R-HSA-8854214.1	TBC RABGAPS%REACTOME%R-HSA-8854214.1	0.0111759	0.120269	1.56943	1	TBC1D17,TBC1D2,ULK1,OPTN,RAB5A,TSC1,TBC1D20,GABARAP,TBC1D10A,RAB11B,RAB11A,RABGAP1,GABARAPL2,TBC1D14,RAB33B,RAB5C,TBC1D25
TYROBP CAUSAL NETWORK%WIKIPATHWAYS_20201210%WP3945%HOMO SAPIENS	TYROBP CAUSAL NETWORK%WIKIPATHWAYS_20201210%WP3945%HOMO SAPIENS	0.0111892	0.120269	1.60806	1	KCNE3,NPC2,SAMSN1,IL10RA,RGS1,CYTL1,IL18,NCF2,TYROBP,LHFPL2,CD84,TNFRSF1B,TGFBR1,ZFP36L2,ITGAX,CD37
POSITIVE REGULATION OF CELL CYCLE PROCESS%GOBP%GO:0090068	POSITIVE REGULATION OF CELL CYCLE PROCESS%GOBP%GO:0090068	0.0112625	0.120411	1.37637	1	BTG2,CDKN1A,MDM2,ANXA1,ADAM17,CDC42,CNOT4,ARID3A,MAD2L1BP,CDK1,ID2,E2F7,CNOT8,INSR,CDC25C,DTL,RDX,E2F8,SPAST,FAM83D,KLHL18,SLF1,STOX1,DYNC1H1,CEP120,RAB11A,KIF23,CNOT6,ECT2,SLF2,RAD21,BECN1,AURKA,PLK4,MTBP,CNOT9,E2F1,RACGAP1,MECP2,CRLF3,RB1,GEN1,TFDP2,ATAD5,CCND3
POSITIVE REGULATION OF ERK1 AND ERK2 CASCADE%GOBP%GO:0070374	POSITIVE REGULATION OF ERK1 AND ERK2 CASCADE%GOBP%GO:0070374	0.0112876	0.120411	1.53298	1	CCR7,CHI3L1,CCL3L3,CD74,GPR183,ICAM1,HLA-DRB1,CD4,CCL24,CCL1,TIRAP,CCR1,CCL3,SLAMF1,CCL23,CRKL,FGFR3,RAP1A,TNFRSF11A,MAP2K7,NOTCH1,MTURN,CD36,PTPN22
TSH%NETPATH%TSH	TSH%NETPATH%TSH	0.011295	0.120411	1.52603	1	ANXA1,SOCS3,NFKBIA,ATF2,SOCS1,SRC,MAPK1,PDPK1,MAP2K3,GNA13,MAPK14,GNAI3,GNAS,PDE4D,IGF1R,RB1,CCND3,MAPK3
TP53 REGULATES TRANSCRIPTION OF ADDITIONAL CELL CYCLE GENES WHOSE EXACT ROLE IN THE P53 PATHWAY REMAIN UNCERTAIN%REACTOME%R-HSA-6804115.1	TP53 REGULATES TRANSCRIPTION OF ADDITIONAL CELL CYCLE GENES WHOSE EXACT ROLE IN THE P53 PATHWAY REMAIN UNCERTAIN%REACTOME%R-HSA-6804115.1	0.0113235	0.120468	1.67404	1	BTG2,CNOT4,CNOT8,CDC25C,CNOT6
HALLMARK_CHOLESTEROL_HOMEOSTASIS%MSIGDB_C2%HALLMARK_CHOLESTEROL_HOMEOSTASIS	HALLMARK_CHOLESTEROL_HOMEOSTASIS%MSIGDB_C2%HALLMARK_CHOLESTEROL_HOMEOSTASIS	0.0113934	0.120965	1.5822	1	LDLR,IDI1,MVK,PNRC1,PLAUR,NFIL3,CTNNB1,DHCR7,HMGCR,ERRFI1,ATF5,HMGCS1,SREBF2,FDFT1,ACSS2,CHKA,FDPS
I-KAPPAB KINASE/NF-KAPPAB SIGNALING%GOBP%GO:0007249	I-KAPPAB KINASE/NF-KAPPAB SIGNALING%GOBP%GO:0007249	0.0114411	0.121225	1.52479	1	IRAK2,BCL10,NFKBIA,TRAF6,TAB2,RELB,TICAM1,RIPK1,TIFA,BIRC3,BCL3,TANK,TLR4,NKIRAS2,TLR7,NKIRAS1
REGULATION OF TELOMERE MAINTENANCE VIA TELOMERASE%GOBP%GO:0032210	REGULATION OF TELOMERE MAINTENANCE VIA TELOMERASE%GOBP%GO:0032210	0.0114918	0.121515	-1.67108	-1	NAT10,PRKCQ,TCP1,HNRNPU,CCT4,PINX1,MAP3K4,PIF1,MAPKAPK5,CCT2,ACD,CCT7,CCT6A,NAF1,ATR
CELLULAR GLUCOSE HOMEOSTASIS%GOBP%GO:0001678	CELLULAR GLUCOSE HOMEOSTASIS%GOBP%GO:0001678	0.0116087	0.122255	-1.79089	-1	HK2,NGFR,HK1,XBP1,SLC39A14,TRA2B,NUCKS1,NR1D1
MITOCHONDRIAL TRANSLATION TERMINATION%REACTOME%R-HSA-5419276.1	MITOCHONDRIAL TRANSLATION TERMINATION%REACTOME%R-HSA-5419276.1	0.011588	0.122255	-1.56701	-1	GFM2,MRPL18,MRPS27,CHCHD1,MRPS33,MRPS23,MRPL1,MRPL13,MRPL58,MRPS25,MRPL4,MRPS12,MRPL32,MRPS31,MRPS2,MRPL12,MRPS34,MRPS9,MRPL15,MRPL24,MRPL2,MRPL9,MRPS26,MRPL28
PI METABOLISM%REACTOME%R-HSA-1483255.5	PI METABOLISM%REACTOME%R-HSA-1483255.5	0.0116369	0.122304	1.50039	1	PLEKHA2,SYNJ2,PIK3R4,PI4K2A,RAB5A,TNFAIP8,TNFAIP8L1,MTMR9,PLEKHA1,PLEKHA3,OCRL,PIK3C2A,INPP5F,MTMR6,SACM1L,PIP5K1C,MTMR3,PIK3C2B,RAB14,MTM1,ARF3,PIP4K2C,PIP5K1A,MTMR12
REGULATION OF TELOMERE MAINTENANCE%GOBP%GO:0032204	REGULATION OF TELOMERE MAINTENANCE%GOBP%GO:0032204	0.0117378	0.123117	-1.60607	-1	HNRNPD,NAT10,PRKCQ,TCP1,HNRNPU,CCT4,PINX1,MAP3K4,PIF1,MAPKAPK5,CCT2,GNL3,ACD,CCT7,CCT6A,NAF1,ATR
NEGATIVE REGULATION OF PEPTIDYL-TYROSINE PHOSPHORYLATION%GOBP%GO:0050732	NEGATIVE REGULATION OF PEPTIDYL-TYROSINE PHOSPHORYLATION%GOBP%GO:0050732	0.0117689	0.123196	1.62707	1	SOCS3,SAMSN1,CBL,SOCS1,INPP5F,SH3BP5L,ERRFI1,SOCS4,DMTN,SOCS5,CAV1,CBLB,LILRB4
POSITIVE REGULATION OF NITRIC OXIDE BIOSYNTHETIC PROCESS%GOBP%GO:0045429	POSITIVE REGULATION OF NITRIC OXIDE BIOSYNTHETIC PROCESS%GOBP%GO:0045429	0.0118932	0.124247	1.66473	1	SMAD3,INSR,HBB,CLEC7A,TLR6,PTGS2,TLR4,P2RX4,CD36
NUCLEOSIDE MONOPHOSPHATE BIOSYNTHETIC PROCESS%GOBP%GO:0009124	NUCLEOSIDE MONOPHOSPHATE BIOSYNTHETIC PROCESS%GOBP%GO:0009124	0.0120031	0.125144	-1.72139	-1	HK2,PPAT,ATIC,IMPDH1,LDHA,HK1,DUT,PFAS,RFK,ADSL,IMPDH2,TGFB1,TPI1,CYC1,GAPDH,PKM,PFKL,DCTD,PFKM,ENO1,ENO3,ALDOA
LXRS REGULATE GENE EXPRESSION LINKED TO CHOLESTEROL TRANSPORT AND EFFLUX%REACTOME DATABASE ID RELEASE 75%9029569	LXRS REGULATE GENE EXPRESSION LINKED TO CHOLESTEROL TRANSPORT AND EFFLUX%REACTOME DATABASE ID RELEASE 75%9029569	0.0121781	0.126715	1.66695	1	NR1H2,ABCA1,EEPD1,TNRC6C,KDM3A,TNRC6A,ABCG1,TNRC6B
AMYLOID-BETA CLEARANCE%GOBP%GO:0097242	AMYLOID-BETA CLEARANCE%GOBP%GO:0097242	0.0123875	0.127581	1.70216	1	LDLR,C3,RAB5A,INSR,RAB11B,RAB11A,IGF1R,CD36,PICALM,CLTC,LRPAP1
ANION TRANSMEMBRANE TRANSPORT%GOBP%GO:0098656	ANION TRANSMEMBRANE TRANSPORT%GOBP%GO:0098656	0.0124293	0.127581	-1.5421	-1	SLC25A15,SLC25A22,SLC7A1,SLC38A5,SLC26A2,SLC38A9,SLC12A2,SLC12A4,SLC7A5,SLC1A5,SLC19A1,ACACA,MID1IP1,SLC37A1,SLC38A10,SLC3A2,SLC38A1,SLC25A3,SLC5A6,SLC16A1,ABCC5,SLC23A2,GABRD,CPT1A,SLC25A19,SLC25A11,SLC12A9,SLC12A7,LRRC8C
CARBOHYDRATE METABOLIC PROCESS%GOBP%GO:0005975	CARBOHYDRATE METABOLIC PROCESS%GOBP%GO:0005975	0.0125712	0.127581	-1.43004	-1	RPIA,HK2,B4GAT1,GSTO1,PPIP5K2,SLC2A8,LDHA,PHKA1,HK1,COQ2,NDST1,SLC39A14,OMA1,PGGHG,ST3GAL4,MDH2,NAGPA,B3GNT2,NR1D1,SORD,ALDH1B1,MAN2C1,IRS2,PGP,B3GNT7,GALK1,PIGQ,XYLB,TPI1,PHKB,IMPA2,PMM2,PYGL,SLC23A2,GYS1,FUT8,AKR1B1,GUSBP1,KHK,GAPDH,PDXP,PKM,SLC25A11,INPP1,PFKL,IDNK,BRAT1,PFKM,FUT6,ENO1,ENO3,ALDOA,TKFC
HOMEOSTASIS OF NUMBER OF CELLS%GOBP%GO:0048872	HOMEOSTASIS OF NUMBER OF CELLS%GOBP%GO:0048872	0.0125377	0.127581	1.52711	1	ANXA1,TNFAIP3,TNFSF14,ALAS1,GPR183,ZBTB7A,HMOX1,FADD,SLC25A38,CEBPG,DMTN,FAS,FLT3,SLC15A4,NOTCH1,NAPEPLD,FLVCR1,LYN
MITOCHONDRIAL TRANSLATIONAL ELONGATION%GOBP%GO:0070125	MITOCHONDRIAL TRANSLATIONAL ELONGATION%GOBP%GO:0070125	0.0125795	0.127581	-1.55977	-1	GFM2,MRPL18,MRPS27,CHCHD1,MRPS33,MRPS23,MRPL1,MRPL13,MRPL58,MRPS25,MRPL4,MRPS12,MRPL32,MRPS31,MRPS2,MRPL12,MRPS34,MRPS9,MRPL15,MRPL24,MRPL2,MRPL9,MRPS26,MRPL28
POSITIVE REGULATION OF MYELOID CELL DIFFERENTIATION%GOBP%GO:0045639	POSITIVE REGULATION OF MYELOID CELL DIFFERENTIATION%GOBP%GO:0045639	0.0123594	0.127581	1.55004	1	CD74,TRAF6,HLA-DRB1,CD4,RIPK1,FADD,EVI2B,CCR1,CTNNBIP1,HSPA1B,TYROBP,FOXO3,BRD1,MAPK14,HMGB2,FAM210B,DCSTAMP,CASP8,FAXDC2,MTURN
POSITIVE REGULATION OF PROTEIN CATABOLIC PROCESS%GOBP%GO:0045732	POSITIVE REGULATION OF PROTEIN CATABOLIC PROCESS%GOBP%GO:0045732	0.0123002	0.127581	1.40041	1	LDLR,MDM2,TNFAIP3,SORL1,RNF19B,RNF41,TMTC3,RNF185,TRIB2,VGLL4,ADAM9,HSPA1B,DTL,PIAS1,SNX9,NFE2L2,TRIB1,PTTG1IP,RDX,AREL1,SH3D19,TNFRSF1B,WWP2,PRICKLE1,SMURF2,CSNK1D,RNF144A,SOCS5,HECTD1,CAV1,APC,BARD1,NKD1
REGULATION OF ACTIN CYTOSKELETON ORGANIZATION%GOBP%GO:0032956	REGULATION OF ACTIN CYTOSKELETON ORGANIZATION%GOBP%GO:0032956	0.0124241	0.127581	1.31796	1	PTGER4,CCR7,CDC42EP4,S100A10,CRK,CDC42,LPAR1,CTTN,SMAD4,ARHGEF5,TWF1,CCL24,RHOQ,PPFIA1,NCK1,TSC1,SIGLEC15,BAIAP2,MTPN,SNX9,LATS1,RDX,RAC1,STMN1,IQGAP1,SSH2,RICTOR,F11R,CAPZA1,TAOK1,ARFIP1,TGFBR1,WASF2,ACTR2,DMTN,SSH1,EPHA1,BCAS3,RHOC,ARPC2,TMSB10,CFL2,MYADM
RIBONUCLEOTIDE METABOLIC PROCESS%GOBP%GO:0009259	RIBONUCLEOTIDE METABOLIC PROCESS%GOBP%GO:0009259	0.0124776	0.127581	-1.42723	-1	ACOT7,HK2,CTPS1,NDUFB5,ACSL4,DHODH,SCD5,SLC26A2,ATIC,IMPDH1,MOCS2,LDHA,HK1,BPNT1,FASN,SULT1B1,GCDH,CMPK1,FAR2,PFAS,RFK,ACACA,TAZ,SULT1A1,HACD2,CAD,COA6,RNASEH2B,ADSL,ELOVL6,IMPDH2,HSPA8,PDHA1,TGFB1,ACSF3
SIGNALING BY RECEPTOR TYROSINE KINASES%REACTOME DATABASE ID RELEASE 75%9006934	SIGNALING BY RECEPTOR TYROSINE KINASES%REACTOME DATABASE ID RELEASE 75%9006934	0.0125178	0.127581	1.30521	1	NCF1,ADAM17,SPP1,CRK,ATF2,CDC42,PSEN1,RNF41,MAPK7,MXD4,SGK1,CTNNB1,FGFBP2,PIK3R4,TAB2,ELMO2,CALM1,ATP6V1A,ID2,NCK1,INSR,GALNT3,SPRY1,BAIAP2,GAB1,CBL,ATP6V1D,RIT1,SH2B2,SOCS1,SRC,JUNB,MAPK1,AXL,ATP6V0D1,NCF2,TRIB1,RAP1B,RAC1,STMN1,PDPK1,SH3GL1,RICTOR,LAMB3,TNS3,ITGA3,PPP2CB,MEF2A,CRKL,FLRT3,RBFOX2,SOCS6,WASF2,THBS1,PDE3B,RPS6KA5,MAPK14,ATP6V1G1,MAPKAPK2,PSENEN,RAPGEF1,S100B,COL6A1,ARHGEF7,NCSTN,ST…
TNFSF8%IOB%TNFSF8	TNFSF8%IOB%TNFSF8	0.0125277	0.127581	1.68095	1	NFKBIA,RELB,MAPK1,NFKB2,MAPK14
TOLL LIKE RECEPTOR 9 (TLR9) CASCADE%REACTOME%R-HSA-168138.2	TOLL LIKE RECEPTOR 9 (TLR9) CASCADE%REACTOME%R-HSA-168138.2	0.0125751	0.127581	1.4911	1	IRAK2,NFKBIA,ATF2,MAPK7,TRAF6,PIK3R4,TAB2,TICAM1,BTRC,MAPK1,IRF7,MAP2K3,PPP2CB,MEF2A,TLR4,NFKB2,PELI2,RPS6KA5,MAPK14,NKIRAS2,MAPKAPK2,TLR7,NKIRAS1,S100B,MAP3K8,MAP2K7
TRANSITION METAL ION HOMEOSTASIS%GOBP%GO:0055076	TRANSITION METAL ION HOMEOSTASIS%GOBP%GO:0055076	0.0125118	0.127581	1.49112	1	MT2A,MT1E,MT-RNR2,SLC31A2,HMOX1,SMAD4,XIAP,MYC,ATP6V1A,FTH1,FTL,HEPH,FBXL5,ATP6V0D1,TFRC,B2M,ATP6V1G1
POSITIVE REGULATION OF CATABOLIC PROCESS%GOBP%GO:0009896	POSITIVE REGULATION OF CATABOLIC PROCESS%GOBP%GO:0009896	0.0126572	0.127625	1.27556	1	BTG2,LDLR,MDM2,TNFAIP3,FLCN,SORL1,TRIM38,RNF19B,TOB1,SESN1,TNRC6C,BNIP3L,PSEN1,RNF41,ULK1,TNRC6A,TMTC3,RNF185,SPTLC1,TICAM1,TRIB2,OPTN,CNOT8,ADRB2,SESN2,INSR,VGLL4,TRIM21,ADAM9,ABCD1,HSPA1B,DTL,PIAS1,SNX9,PIK3C2A,NFE2L2,TRIB1,PTTG1IP,FOXO3,RDX,AREL1,SH3D19,TMEM59,TNRC6B,TNFRSF1B,WWP2,ZFP36L2,PRICKLE1,SMURF2,DTX3L,CALCOCO2,CSNK1D,RNF144A,SOCS5,HECTD1,TRIM22,METTL14,WAC,SCOC,GNAI3,CAV1,TRIM13,APC,P…
POSITIVE REGULATION OF CYTOKINE-MEDIATED SIGNALING PATHWAY%GOBP%GO:0001961	POSITIVE REGULATION OF CYTOKINE-MEDIATED SIGNALING PATHWAY%GOBP%GO:0001961	0.0126209	0.127625	1.66348	1	ADAM17,CD74,RIPK1,FADD,HSPA1B,AXL
POSITIVE REGULATION OF STRESS-ACTIVATED PROTEIN KINASE SIGNALING CASCADE%GOBP%GO:0070304	POSITIVE REGULATION OF STRESS-ACTIVATED PROTEIN KINASE SIGNALING CASCADE%GOBP%GO:0070304	0.0126442	0.127625	1.464	1	CCR7,NCF1,SDCBP,TRAF6,ARHGEF5,FCGR2B,RIPK1,TIRAP,SLAMF1,ZNF622,PDCD10,TLR6,RELL1,TAOK1,ARL6IP5,RNF13,SPAG9,TNFRSF11A,MAP3K2,MAP2K7
IL5%NETPATH%IL5	IL5%NETPATH%IL5	0.0127275	0.127837	1.51239	1	SDCBP,NFKBIA,ATF2,CTNNB1,CBL,SH2B2,SOCS1,MAPK1,FOXO3,CSF2RB,CRKL,MAPK14,RAPGEF1,YWHAZ
REGULATION OF CD4-POSITIVE, ALPHA-BETA T CELL DIFFERENTIATION%GOBP%GO:0043370	REGULATION OF CD4-POSITIVE, ALPHA-BETA T CELL DIFFERENTIATION%GOBP%GO:0043370	0.0127763	0.127837	1.65524	1	ANXA1,HLA-DRA,MYB,CD86,HLA-DRB1,IL18,TNFSF4,SOCS1,NLRP3,SOCS5,RC3H2,RC3H1,IRF4
REGULATION OF RESPONSE TO CYTOKINE STIMULUS%GOBP%GO:0060759	REGULATION OF RESPONSE TO CYTOKINE STIMULUS%GOBP%GO:0060759	0.012706	0.127837	1.4422	1	ADAM17,TNFAIP3,IRAK2,SOCS3,NR1H2,IFNAR2,IL1RN,CD74,MAPK7,RIPK1,FADD,IFNGR2,SPATA2,HSPA1B,BIRC3,SOCS1,AXL,PIAS1,RNASEL,DDX58,TLR4,OTULIN
TAK1 ACTIVATES NFKB BY PHOSPHORYLATION AND ACTIVATION OF IKKS COMPLEX%REACTOME%R-HSA-445989.3	TAK1 ACTIVATES NFKB BY PHOSPHORYLATION AND ACTIVATION OF IKKS COMPLEX%REACTOME%R-HSA-445989.3	0.0127563	0.127837	1.61164	1	IRAK2,NFKBIA,TRAF6,TAB2,NFKB2,NKIRAS2,NKIRAS1,S100B
ENDOTHELIUM DEVELOPMENT%GOBP%GO:0003158	ENDOTHELIUM DEVELOPMENT%GOBP%GO:0003158	0.0128514	0.128342	1.58374	1	ICAM1,CTNNB1,ACVR1,SMAD4,PPP1R16B,PECAM1,KDM6B,RDX,RAP1B,F11R,RAP2C,SCUBE1,RAPGEF1,RAP1A,RAB1A,MYADM,NOTCH1,ACVR2B,PDE4D,RAB1B,RAP2B,DLL1,EZR,RAPGEF2
TOLL-LIKE RECEPTOR SIGNALING PATHWAY%GOBP%GO:0002224	TOLL-LIKE RECEPTOR SIGNALING PATHWAY%GOBP%GO:0002224	0.012931	0.128889	1.50333	1	IRAK2,BCL10,TRAF6,PIK3R4,TAB2,TICAM1,CD40,RIPK1,FADD,TIRAP,BIRC3,IRF7,TANK,TLR6,TLR4,MAPKAPK2,SFTPD,TLR7,PIK3AP1,TBK1,CASP8,CTSB,CD36
NEGATIVE REGULATION OF TRANSMEMBRANE RECEPTOR PROTEIN SERINE/THREONINE KINASE SIGNALING PATHWAY%GOBP%GO:0090101	NEGATIVE REGULATION OF TRANSMEMBRANE RECEPTOR PROTEIN SERINE/THREONINE KINASE SIGNALING PATHWAY%GOBP%GO:0090101	0.0129705	0.129037	1.46638	1	SMAD3,ADAM17,SORL1,TGFBR2,ZBTB7A,ACVR1,CD109,SPRY1,FAM89B,PDPK1,TGFBR1,BCL9L,SMURF2,SKI,LEMD3,TRIM33,SPRED2,CAV1,PPM1A,ZNF451,NOTCH1
CELLULAR RESPONSE TO AMINO ACID STARVATION%GOBP%GO:0034198	CELLULAR RESPONSE TO AMINO ACID STARVATION%GOBP%GO:0034198	0.0130327	0.129217	1.61183	1	CDKN1A,FLCN,RRAGC,SESN1,EIF2AK3,SESN2,MAPK1,RRAGD
OXIDATIVE DAMAGE%WIKIPATHWAYS_20201210%WP3941%HOMO SAPIENS	OXIDATIVE DAMAGE%WIKIPATHWAYS_20201210%WP3941%HOMO SAPIENS	0.0130382	0.129217	1.62769	1	CDKN1C,CDKN1A,CDC42,TRAF6,BAG4,TNFRSF1B
CELLULAR RESPONSE TO ANTIBIOTIC%GOBP%GO:0071236	CELLULAR RESPONSE TO ANTIBIOTIC%GOBP%GO:0071236	0.013127	0.12985	1.54121	1	MDM2,ANXA1,TNFAIP3,MAPK7,RIPK1,PLEKHA1,NFE2L2,CYP1B1,PDCD10,ECT2,PPIF,ADCY7,OSER1
MITOCHONDRIAL GENE EXPRESSION%GOBP%GO:0140053	MITOCHONDRIAL GENE EXPRESSION%GOBP%GO:0140053	0.0134137	0.132185	-1.52329	-1	GFM2,MRPL18,TRIT1,MRPS27,LARS2,CHCHD1,MRPS33,TFAM,AARS2,PUS1,MRPS23,MRPL1,POLRMT,MRPL13,DARS2,MRPL58,MRPS25,SLC25A33,MRPL4,ELAC2,MRPS12,MRPL32,MRPS31,MRPS2,MRPL12,PNPT1,MRPS34,MRPS9,MTERF2,SUPV3L1,TBRG4,MRPL15,MRPL24,MRPL2,MRPL9,MRPS26,MRPL28,GATC,QRSL1,RARS2,EARS2,MRPL57,GFM1
TRANSMEMBRANE TRANSPORT%GOBP%GO:0055085	TRANSMEMBRANE TRANSPORT%GOBP%GO:0055085	0.0133988	0.132185	-1.33659	-1	TIMM17B,SLC25A15,SLC39A10,SLC25A22,PEX10,TMEM30A,SLC7A1,ERLIN1,TRPM2,SLC27A4,MRPL18,KCNK5,SLC38A5,SLC17A9,SLC26A2,EIF2S3,SLC38A9,SEL1L,SLC2A8,SFXN4,RALBP1,SEC63,SLC12A2,ATP8B2,TAP2,TPCN1,TOMM40,PEX6,F2R,SLC39A14,SLC12A4,SLC25A37,PSMA8,ATP8A1,SLC7A5,SLC1A5,SLC19A1,MRS2,KCNH4,ATP6V1F,ATP11B,SLC30A1,UBC,ACACA,LETM1,PSMD10,MID1IP1,TIMM44,PSMB8,KCNK6,HSPA5,ATP13A2,SLC37A1,TIMM9,CLCN2,SLC9B2,SLC38A10,A…
RIBONUCLEOPROTEIN COMPLEX EXPORT FROM NUCLEUS%GOBP%GO:0071426	RIBONUCLEOPROTEIN COMPLEX EXPORT FROM NUCLEUS%GOBP%GO:0071426	0.0134412	0.132206	-1.50332	-1	SRSF7,XPOT,NOP9,NUP107,CPSF1,NOL6,MAGOHB,SRSF1,DDX39A,XPO1,NUP50,NUP43,SEH1L,CPSF3,RRS1,SYMPK,DDX39B,NCBP1,NUP155,SMG7,U2AF1,THOC3,SRSF5,LTV1,THOC6,THOC1,MCM3AP,ABCE1,RAN,NXT1,PCID2,DDX19A,DHX38,SRSF3,NUP210,YTHDC1,SRSF2,SRSF9
REGULATION OF INTERFERON-GAMMA-MEDIATED SIGNALING PATHWAY%GOBP%GO:0060334	REGULATION OF INTERFERON-GAMMA-MEDIATED SIGNALING PATHWAY%GOBP%GO:0060334	0.0135221	0.132502	1.68081	1	SOCS3,NR1H2,IFNGR2,SOCS1,PIAS1
REGULATION OF RESPONSE TO INTERFERON-GAMMA%GOBP%GO:0060330	REGULATION OF RESPONSE TO INTERFERON-GAMMA%GOBP%GO:0060330	0.0135221	0.132502	1.68081	1	SOCS3,NR1H2,IFNGR2,SOCS1,PIAS1
BRAIN-DERIVED NEUROTROPHIC FACTOR (BDNF) SIGNALING PATHWAY%WIKIPATHWAYS_20201210%WP2380%HOMO SAPIENS	BRAIN-DERIVED NEUROTROPHIC FACTOR (BDNF) SIGNALING PATHWAY%WIKIPATHWAYS_20201210%WP2380%HOMO SAPIENS	0.0135876	0.132893	1.46021	1	NCF1,ADAM17,SQSTM1,NFKBIA,CDC42,MAPK7,TRAF6,CTNNB1,NCK1,CDH2,SH2B2,SRC,MAPK1,NCF2,FOXO3,RAC1,PDPK1,CAMK2A,RPS6KA5,MAPK14,RAP1A,APC,MAP3K2
NEGATIVE REGULATION OF TRANSFORMING GROWTH FACTOR BETA RECEPTOR SIGNALING PATHWAY%GOBP%GO:0030512	NEGATIVE REGULATION OF TRANSFORMING GROWTH FACTOR BETA RECEPTOR SIGNALING PATHWAY%GOBP%GO:0030512	0.0136587	0.133147	1.51201	1	SMAD3,ADAM17,TGFBR2,ZBTB7A,CD109,SPRY1,FAM89B,PDPK1,TGFBR1,BCL9L,SMURF2,SKI,LEMD3,SPRED2,CAV1,PPM1A,ZNF451
SIGNALING EVENTS MEDIATED BY VEGFR1 AND VEGFR2%PATHWAY INTERACTION DATABASE NCI-NATURE CURATED DATA%SIGNALING EVENTS MEDIATED BY VEGFR1 AND VEGFR2	SIGNALING EVENTS MEDIATED BY VEGFR1 AND VEGFR2%PATHWAY INTERACTION DATABASE NCI-NATURE CURATED DATA%SIGNALING EVENTS MEDIATED BY VEGFR1 AND VEGFR2	0.0136646	0.133147	1.50368	1	CDC42,CTNNB1,NCK1,GAB1,CBL,SRC,MAPK1,PDPK1,IQGAP1,MAP2K3,VCL,MAPK14,MAPKAPK2,CAV1,ITGAV,MAPK3,BRAF,RAF1,CTNNA1,PRKCD,RHOA,SHB,NCK2,VEGFA,PIK3CA,GRB2,ARF1,PLCG1
RESPONSE TO AMINO ACID STARVATION%GOBP%GO:1990928	RESPONSE TO AMINO ACID STARVATION%GOBP%GO:1990928	0.0137286	0.133521	1.62733	1	CDKN1A,FLCN,RRAGC,SESN1,EIF2AK3,SESN2,MAPK1,RRAGD
MYD88 DEPENDENT CASCADE INITIATED ON ENDOSOME%REACTOME DATABASE ID RELEASE 75%975155	MYD88 DEPENDENT CASCADE INITIATED ON ENDOSOME%REACTOME DATABASE ID RELEASE 75%975155	0.0140723	0.136354	1.50663	1	IRAK2,NFKBIA,ATF2,MAPK7,TRAF6,TAB2,TICAM1,BTRC,MAPK1,IRF7,MAP2K3,PPP2CB,MEF2A,TLR4,NFKB2,PELI2,RPS6KA5,MAPK14,NKIRAS2,MAPKAPK2,TLR7,NKIRAS1,S100B,MAP3K8,MAP2K7
TOLL LIKE RECEPTOR 7 8 (TLR7 8) CASCADE%REACTOME DATABASE ID RELEASE 75%168181	TOLL LIKE RECEPTOR 7 8 (TLR7 8) CASCADE%REACTOME DATABASE ID RELEASE 75%168181	0.0140723	0.136354	1.50663	1	IRAK2,NFKBIA,ATF2,MAPK7,TRAF6,TAB2,TICAM1,BTRC,MAPK1,IRF7,MAP2K3,PPP2CB,MEF2A,TLR4,NFKB2,PELI2,RPS6KA5,MAPK14,NKIRAS2,MAPKAPK2,TLR7,NKIRAS1,S100B,MAP3K8,MAP2K7
COENZYME METABOLIC PROCESS%GOBP%GO:0006732	COENZYME METABOLIC PROCESS%GOBP%GO:0006732	0.0142443	0.137765	-1.42043	-1	ACOT7,RPIA,HK2,ACSL4,GSTO1,PM20D2,SCD5,MOCS2,MAT2A,LDHA,HK1,COQ2,FASN,GCDH,UBIAD1,NAPRT,GPD2,FAR2,RFK,SLC19A1,ACACA,NAMPT,MTHFD1,LIAS,HACD2,KCNAB2,QDPR,ELOVL6,PARP10,PDHA1,ACSF3,TPI1,SLC5A6,SLC23A2,ACSM3,COASY,PARP16,PDSS1
REGULATION OF NUCLEAR SMAD2 3 SIGNALING%PATHWAY INTERACTION DATABASE NCI-NATURE CURATED DATA%REGULATION OF NUCLEAR SMAD2 3 SIGNALING	REGULATION OF NUCLEAR SMAD2 3 SIGNALING%PATHWAY INTERACTION DATABASE NCI-NATURE CURATED DATA%REGULATION OF NUCLEAR SMAD2 3 SIGNALING	0.0143634	0.138404	1.42183	1	CDKN1A,SMAD3,TGIF2,ATF2,AR,SMAD4,PIAS4,MYC,IRF7,FOXO3,SP3,SKI,MAX,TFE3,ITGB5,SNIP1,SIN3A,SKIL,RBBP4,NCOA1,PIAS3,RBBP7,HDAC1,TFDP1,SP1,MED15,EP300,CREB1
TOLL LIKE RECEPTOR 3 (TLR3) CASCADE%REACTOME%R-HSA-168164.3	TOLL LIKE RECEPTOR 3 (TLR3) CASCADE%REACTOME%R-HSA-168164.3	0.0143371	0.138404	1.48057	1	IRAK2,NFKBIA,ATF2,MAPK7,TRAF6,TAB2,TICAM1,RIPK1,FADD,BTRC,BIRC3,MAPK1,IRF7,MAP2K3,TANK,PPP2CB,MEF2A,NFKB2,RPS6KA5,MAPK14,NKIRAS2,MAPKAPK2,NKIRAS1,S100B,MAP3K8,MAP2K7,TBK1,ATF1,CASP8
REGULATION OF TP53 DEGRADATION%REACTOME DATABASE ID RELEASE 75%6804757	REGULATION OF TP53 DEGRADATION%REACTOME DATABASE ID RELEASE 75%6804757	0.0143923	0.138426	1.62731	1	MDM2,SGK1,RNF34,CCNG1,CDK1,PDPK1,RICTOR,PPP2CB,CCNA1,PPP2R5C
REGULATION OF MONOCYTE CHEMOTAXIS%GOBP%GO:0090025	REGULATION OF MONOCYTE CHEMOTAXIS%GOBP%GO:0090025	0.0145321	0.139002	1.69548	1	MOSPD2,CCR2,CCL1,CCR1,LYN,CCL5
REGULATION OF NITRIC OXIDE BIOSYNTHETIC PROCESS%GOBP%GO:0045428	REGULATION OF NITRIC OXIDE BIOSYNTHETIC PROCESS%GOBP%GO:0045428	0.0145221	0.139002	1.63523	1	SMAD3,CX3CR1,INSR,HBB,RAC1,CLEC7A,TLR6,PTGS2,TLR4,CAV1,P2RX4
TRAF6 MEDIATED INDUCTION OF NFKB AND MAP KINASES UPON TLR7 8 OR 9 ACTIVATION%REACTOME DATABASE ID RELEASE 75%975138	TRAF6 MEDIATED INDUCTION OF NFKB AND MAP KINASES UPON TLR7 8 OR 9 ACTIVATION%REACTOME DATABASE ID RELEASE 75%975138	0.0145044	0.139002	1.47107	1	IRAK2,NFKBIA,ATF2,MAPK7,TRAF6,TAB2,TICAM1,BTRC,MAPK1,MAP2K3,PPP2CB,MEF2A,TLR4,NFKB2,PELI2,RPS6KA5,MAPK14,NKIRAS2,MAPKAPK2,TLR7,NKIRAS1,S100B,MAP3K8,MAP2K7
MODULATION OF CHEMICAL SYNAPTIC TRANSMISSION%GOBP%GO:0050804	MODULATION OF CHEMICAL SYNAPTIC TRANSMISSION%GOBP%GO:0050804	0.0145878	0.139279	-1.54249	-1	ITGB1,ADGRB1,SNCA,FMR1,GRIK5,TPRG1L,SYNGAP1,NCDN,KAT2A,HOMER1,DLGAP3,SLC12A2,GRM4,KCNMB4,VAMP2,SHANK1,MAP1A,SHANK3,SLC30A1,PPFIA3,ANAPC2,PPP3CB,AKAP9,TMEM25
REGULATION OF MACROAUTOPHAGY%GOBP%GO:0016241	REGULATION OF MACROAUTOPHAGY%GOBP%GO:0016241	0.0147289	0.140369	1.42694	1	RRAGC,SESN1,BNIP3L,ULK1,SPTLC1,OPTN,RAB5A,ATP6V1A,ADRB2,PHF23,SESN2,TSC1,ATG13,ATP6V1D,ATP6V0D1,RRAGD,EXOC1,LAMTOR3,PRKAB1,MTMR3,TMEM39B,ATP6V1G1,CALCOCO2,WAC,SCOC,MTM1,GNAI3,TRIM13,HTT,PIP4K2C,VPS26A,TBK1,FEZ2,ATP6V1C1,RAB3GAP1,ATP6V1C2,SH3GLB1,RAB1B,EXOC8,MAP3K7,RALB,CAPNS1,TBC1D14,SNX6,PRKAA1,CHMP4B,TBC1D25,CAPN1,SMCR8,PIKFYVE,IFT88,RHEB,UBQLN2,TOMM7,TMEM39A,NRBP2,LAMTOR4,UBQLN1
INFLAMMATION MEDIATED BY CHEMOKINE AND CYTOKINE SIGNALING PATHWAY%PANTHER PATHWAY%P00031	INFLAMMATION MEDIATED BY CHEMOKINE AND CYTOKINE SIGNALING PATHWAY%PANTHER PATHWAY%P00031	0.0147929	0.14062	1.39675	1	CCR7,ALOX5AP,CXCR3,CCL3L3,RRAS,CCRL2,CDC42,PLCD3,CX3CR1,RELB,CCR2,PAK4,CCR1,CCL3,JUNB,MAPK1,NFATC1,RAC1,PDPK1,CAMK2A,GNG7,PLCL2,CAMK2G,PTGS2,ITGB7,NFKB2,SOCS6,MAPK1IP1L,PLA2G4A,SOCS4,GNG5,COL6A1,GNG2,SOCS5,GNAI3,RHOC,FPR1,ARPC2
POSITIVE REGULATION OF IMMUNE EFFECTOR PROCESS%GOBP%GO:0002699	POSITIVE REGULATION OF IMMUNE EFFECTOR PROCESS%GOBP%GO:0002699	0.0148166	0.14062	1.41074	1	VAMP3,ANXA1,HLA-DRA,MYB,CD86,BCL10,CD74,TRAF6,FBXO38,HLA-DRB1,ZCCHC3,ZBTB1,TICAM1,CD40,CCR2,FADD,IL18,TNFSF4,TFRC,CD84,HLA-DMB,DDX58,B2M,NLRP3,SOCS5,KMT5B,CD244
UBIQUITIN-DEPENDENT DEGRADATION OF CYCLIN D%REACTOME DATABASE ID RELEASE 75%75815	UBIQUITIN-DEPENDENT DEGRADATION OF CYCLIN D%REACTOME DATABASE ID RELEASE 75%75815	0.0148362	0.14062	-1.66071	-1	CCND1,PSMA8,UBC,PSMD10,PSMB8,PSMB4,PSMB9,PSMA5,PSMA3,PSMC5,PSMC4,PSMA2,PSMD3
MONOSACCHARIDE METABOLIC PROCESS%GOBP%GO:0005996	MONOSACCHARIDE METABOLIC PROCESS%GOBP%GO:0005996	0.0149804	0.141494	-1.59055	-1	RPIA,HK2,GSTO1,HK1,SLC39A14,OMA1,MDH2,SORD,IRS2,GALK1,XYLB,TPI1,PMM2,SLC23A2,FUT8,AKR1B1,KHK,GAPDH,PKM,SLC25A11,PFKL,BRAT1,PFKM,FUT6,ENO1,ENO3,ALDOA,TKFC,FUOM
REGULATION OF INTERLEUKIN-12 PRODUCTION%GOBP%GO:0032655	REGULATION OF INTERLEUKIN-12 PRODUCTION%GOBP%GO:0032655	0.0149827	0.141494	1.62366	1	CCR7,CMKLR1,CD40,TIRAP,SLAMF1,TNFSF4,CLEC7A,TLR4,THBS1,MAPK14
INORGANIC CATION IMPORT ACROSS PLASMA MEMBRANE%GOBP%GO:0098659	INORGANIC CATION IMPORT ACROSS PLASMA MEMBRANE%GOBP%GO:0098659	0.0151455	0.14173	-1.76398	-1	SLC39A10,TRPM2,SLC12A2,SLC39A14,SLC12A4
INORGANIC ION IMPORT ACROSS PLASMA MEMBRANE%GOBP%GO:0099587	INORGANIC ION IMPORT ACROSS PLASMA MEMBRANE%GOBP%GO:0099587	0.0151455	0.14173	-1.76398	-1	SLC39A10,TRPM2,SLC12A2,SLC39A14,SLC12A4
PROTEIN SECRETION%GOBP%GO:0009306	PROTEIN SECRETION%GOBP%GO:0009306	0.0150415	0.14173	1.49446	1	ANXA1,ABCA1,TVP23B,TMEM167A,RAB12,RAB11B,CAMK2G,DMTN,RCN3,SVBP,RAB13,RAB3D,ARL4D
REGULATION OF TP53 EXPRESSION AND DEGRADATION%REACTOME%R-HSA-6806003.2	REGULATION OF TP53 EXPRESSION AND DEGRADATION%REACTOME%R-HSA-6806003.2	0.0150863	0.14173	1.59545	1	MDM2,SGK1,RNF34,CCNG1,CDK1,PDPK1,RICTOR,PPP2CB,CCNA1,PPP2R5C
RESPONSE TO OXYGEN LEVELS%GOBP%GO:0070482	RESPONSE TO OXYGEN LEVELS%GOBP%GO:0070482	0.015198	0.14173	1.3958	1	MDM2,SMAD3,ADAM17,ALAS1,BNIP3L,HMOX1,SMAD4,ADA,HIF1AN,MYC,ATP6V1A,TSC1,CITED2,ATP6V0D1,NFE2L2,PSMD5,PTGS2,STOX1,DDIT4,THBS1,ATP6V1G1,EGLN3,FAS,CAV1,PSMD11,SLC11A2,NOTCH1
RIBONUCLEOSIDE MONOPHOSPHATE BIOSYNTHETIC PROCESS%GOBP%GO:0009156	RIBONUCLEOSIDE MONOPHOSPHATE BIOSYNTHETIC PROCESS%GOBP%GO:0009156	0.0150927	0.14173	-1.6871	-1	HK2,PPAT,ATIC,IMPDH1,LDHA,HK1,PFAS,RFK,ADSL,IMPDH2,TGFB1,TPI1,CYC1,GAPDH,PKM,PFKL,PFKM,ENO1,ENO3,ALDOA
TRNA PROCESSING%REACTOME%R-HSA-72306.6	TRNA PROCESSING%REACTOME%R-HSA-72306.6	0.0151782	0.14173	-1.57791	-1	FAM98B,CTU2,TRIT1,XPOT,DUS2,NUP107,CPSF1,TRMT61A,TRMT1,POP5,METTL1,RPP25,NSUN6,TRMU,NUP50,QTRT1,FTSJ1,NUP43,ELAC2,ADAT2,NUP155,NSUN2,ZBTB8OS,CDKAL1,TSEN54,TYW1,RPP40,OSGEP,RAN,TSEN2,POP4
GASTRIC CANCER NETWORK 2%WIKIPATHWAYS_20201210%WP2363%HOMO SAPIENS	GASTRIC CANCER NETWORK 2%WIKIPATHWAYS_20201210%WP2363%HOMO SAPIENS	0.0152362	0.141833	-1.77572	-1	MTDH,LBR,TOP2A,LMNB2
MATURATION OF 5.8S RRNA FROM TRICISTRONIC RRNA TRANSCRIPT (SSU-RRNA, 5.8S RRNA, LSU-RRNA)%GOBP%GO:0000466	MATURATION OF 5.8S RRNA FROM TRICISTRONIC RRNA TRANSCRIPT (SSU-RRNA, 5.8S RRNA, LSU-RRNA)%GOBP%GO:0000466	0.0152638	0.141836	-1.8278	-1	EXOSC8,WDR12,NOP9,URB1,PES1,EXOSC2,UTP20,RRS1,KRI1,EXOSC7,RPP40
REGULATION OF CHOLESTEROL EFFLUX%GOBP%GO:0010874	REGULATION OF CHOLESTEROL EFFLUX%GOBP%GO:0010874	0.0153158	0.142066	1.63892	1	NR1H2,ABCA1,EEPD1,NFKBIA,SREBF2,CAV1
DIVALENT INORGANIC CATION HOMEOSTASIS%GOBP%GO:0072507	DIVALENT INORGANIC CATION HOMEOSTASIS%GOBP%GO:0072507	0.0154045	0.142536	1.42	1	MT2A,MT1E,PTGER4,CCR7,CXCR3,SMAD3,CCRL2,LPAR1,CMKLR1,PSEN1,CX3CR1,CD40,CALM1,CAV2,CCR2,CCL1,C19orf12,CCR1,CCL3,GPR157,CCL23,SLC25A23,TMEM178A,PDPK1,CNNM4,C5AR2,MCUB,ANXA6,TPT1,GHRL,CAV1,CD55,FPR1,P2RX4,NPTN,HTT,SLC24A3,MCU
RAB REGULATION OF TRAFFICKING%REACTOME DATABASE ID RELEASE 75%9007101	RAB REGULATION OF TRAFFICKING%REACTOME DATABASE ID RELEASE 75%9007101	0.0154211	0.142536	1.41277	1	DENND6A,TBC1D17,TBC1D2,ULK1,RAB18,RAB12,RIN3,OPTN,RAB5A,TSC1,TBC1D20,MON1B,GABARAP,RAB9A,TBC1D10A,RAB11B,TRAPPC10,RAB11A,RAB14,RAB13,RAB1A,RABGAP1,RAB3GAP1,RAB1B,DENND5A,DENND4A,GABARAPL2,DENND4C,DENND2D,YWHAE,TBC1D14,RAB31,RAB33B,RAB5C
PID_VEGFR1_2_PATHWAY%MSIGDB_C2%PID_VEGFR1_2_PATHWAY	PID_VEGFR1_2_PATHWAY%MSIGDB_C2%PID_VEGFR1_2_PATHWAY	0.0155043	0.142584	1.49223	1	CDC42,CTNNB1,NCK1,CBL,SRC,MAPK1,PDPK1,MAP2K3,PRKAB1,MAPK14,MAPKAPK2,ITGAV,MAPK3,BRAF,RAF1,PRKAA1,CTNNA1,SHB,NCK2,VEGFA,PIK3CA,GRB2,ARF1
PROSTAGLANDIN SYNTHESIS AND REGULATION%WIKIPATHWAYS_20201210%WP98%HOMO SAPIENS	PROSTAGLANDIN SYNTHESIS AND REGULATION%WIKIPATHWAYS_20201210%WP98%HOMO SAPIENS	0.0155084	0.142584	1.66736	1	PTGER4,ANXA2,ANXA1,S100A10,S100A6,PTGS2,ANXA6
TOLL-LIKE RECEPTOR SIGNALING PATHWAY%WIKIPATHWAYS_20201210%WP75%HOMO SAPIENS	TOLL-LIKE RECEPTOR SIGNALING PATHWAY%WIKIPATHWAYS_20201210%WP75%HOMO SAPIENS	0.0154873	0.142584	1.45998	1	IFNAR2,NFKBIA,TRAF6,TICAM1,CD40,RIPK1,FADD,TIRAP,CCL3,MAPK1,IRF7,RAC1,MAP2K3,TLR4,MAPK14,TLR7,MAP3K8
COFACTOR METABOLIC PROCESS%GOBP%GO:0051186	COFACTOR METABOLIC PROCESS%GOBP%GO:0051186	0.0156853	0.143552	-1.39046	-1	ACOT7,RPIA,HK2,ACSL4,GSTO1,PM20D2,SCD5,GGCT,MOCS2,AMN,RSAD1,MAT2A,NUBPL,LDHA,GLRX5,GPT2,HK1,HAGH,COQ2,FASN,GSR,D2HGDH,GCDH,UBIAD1,NAPRT,GPD2,FAR2,ISCU,RFK,SLC19A1,ACACA,NAMPT,MTHFD1,LIAS,HACD2,GGT5,KCNAB2,QDPR,UROD,ELOVL6,PARP10,PDHA1,ACSF3,GLRX3,TPI1,SLC5A6,HMBS,CNDP2,SLC23A2,ACSM3,COASY,PARP16,GCLC,PDSS1,CRYZL1
DISEASES ASSOCIATED WITH THE TLR SIGNALING CASCADE%REACTOME DATABASE ID RELEASE 75%5602358	DISEASES ASSOCIATED WITH THE TLR SIGNALING CASCADE%REACTOME DATABASE ID RELEASE 75%5602358	0.0157136	0.143552	1.66115	1	NFKBIA,TICAM1,TIRAP,TLR6,TLR4,NFKB2,CD36,TLR1,TLR10,IRAK4
DISEASES OF IMMUNE SYSTEM%REACTOME%R-HSA-5260271.2	DISEASES OF IMMUNE SYSTEM%REACTOME%R-HSA-5260271.2	0.0157136	0.143552	1.66115	1	NFKBIA,TICAM1,TIRAP,TLR6,TLR4,NFKB2,CD36,TLR1,TLR10,IRAK4
MITOCHONDRIAL TRANSLATIONAL TERMINATION%GOBP%GO:0070126	MITOCHONDRIAL TRANSLATIONAL TERMINATION%GOBP%GO:0070126	0.0157768	0.143552	-1.57052	-1	GFM2,MRPL18,MRPS27,CHCHD1,MRPS33,MRPS23,MRPL1,MRPL13,MRPL58,MRPS25,MRPL4,MRPS12,MRPL32,MRPS31,MRPS2,MRPL12,MRPS34,MRPS9,MRPL15,MRPL24,MRPL2,MRPL9,MRPS26,MRPL28
NEGATIVE REGULATION OF APOPTOTIC SIGNALING PATHWAY%GOBP%GO:2001234	NEGATIVE REGULATION OF APOPTOTIC SIGNALING PATHWAY%GOBP%GO:2001234	0.0157789	0.143552	1.41338	1	MDM2,TNFAIP3,NR4A2,CD74,MAPK7,ICAM1,PLAUR,ACVR1,AR,HMOX1,CX3CR1,RNF34,TNFSF10,RIPK1,FADD,HSPA1B,SRC,TNFRSF10B,NFE2L2,PTTG1IP,DDIAS,TGFBR1,THBS1,TMEM14A,TMBIM6,TPT1,FAS
NEGATIVE REGULATION OF IMMUNE EFFECTOR PROCESS%GOBP%GO:0002698	NEGATIVE REGULATION OF IMMUNE EFFECTOR PROCESS%GOBP%GO:0002698	0.0157337	0.143552	1.47354	1	MICB,ANXA1,HAVCR2,A2M,SEC14L1,FCGR2B,CCR2,TNFSF4,CD84,SOCS5,RC3H2,GRN,CD55,RC3H1,SERPING1
CALCIUM ION HOMEOSTASIS%GOBP%GO:0055074	CALCIUM ION HOMEOSTASIS%GOBP%GO:0055074	0.0158085	0.143571	1.36136	1	PTGER4,CCR7,CXCR3,SMAD3,CCRL2,LPAR1,CMKLR1,PSEN1,CX3CR1,CD40,CALM1,CAV2,CCR2,CCL1,C19orf12,CCR1,CCL3,GPR157,CCL23,SLC25A23,TMEM178A,PDPK1,C5AR2,MCUB,ANXA6,TPT1,GHRL,CAV1,CD55,FPR1,P2RX4,NPTN,HTT,SLC24A3,MCU,TMCO1,GPR35,TRPV1,WFS1,CD36,DMPK,DRD4,YWHAE,P2RY8,TPCN2
LYMPHOCYTE CHEMOTAXIS%GOBP%GO:0048247	LYMPHOCYTE CHEMOTAXIS%GOBP%GO:0048247	0.0159709	0.144291	1.66434	1	CCL3L3,GPR183,CCL24,CCR2,CCL1,CCL3,CCL23
REGULATION OF CELLULAR EXTRAVASATION%GOBP%GO:0002691	REGULATION OF CELLULAR EXTRAVASATION%GOBP%GO:0002691	0.0159709	0.144291	1.68795	1	PTGER4,ICAM1,CD99,CCR2,FADD
RESPONSE TO FATTY ACID%GOBP%GO:0070542	RESPONSE TO FATTY ACID%GOBP%GO:0070542	0.0159709	0.144291	1.66349	1	PTGER4,CCR7,TNFSF4,FOXO3,GNG2
CARDIAC SEPTUM DEVELOPMENT%GOBP%GO:0003279	CARDIAC SEPTUM DEVELOPMENT%GOBP%GO:0003279	0.0160066	0.144364	1.60077	1	SEMA3C,TGFBR2,ACVR1,MAML1,SMAD4,CITED2,TGFBR1,HECTD1,NOTCH1,SMAD6
REGULATION OF MYELOID CELL DIFFERENTIATION%GOBP%GO:0045637	REGULATION OF MYELOID CELL DIFFERENTIATION%GOBP%GO:0045637	0.0160756	0.144736	1.39414	1	TNRC6C,CNOT4,CD74,TRAF6,TNRC6A,HLA-DRB1,CD4,RIPK1,MYC,FADD,EVI2B,SIGLEC15,CCR1,CTNNBIP1,CCL3,HSPA1B,TYROBP,IRF7,FOXO3,TMEM178A,TNRC6B,BRD1,TLR4,THBS1,MAPK14,GPR137B,HMGB2,FAM210B,DCSTAMP,LILRB3,LGALS3,CASP8,LYN,CTR9,FAXDC2,AGO1,MTURN,LDB1,LILRB4,KMT2A,SIN3A,ACVR1B
NECTIN ADHESION PATHWAY%PATHWAY INTERACTION DATABASE NCI-NATURE CURATED DATA%NECTIN ADHESION PATHWAY	NECTIN ADHESION PATHWAY%PATHWAY INTERACTION DATABASE NCI-NATURE CURATED DATA%NECTIN ADHESION PATHWAY	0.0161092	0.144789	1.6827	1	CRK,CDC42,CTNNB1,SRC,RAP1B,RAC1,IQGAP1,F11R,PIP5K1C,RAPGEF1,RAP1A
TRANSLATIONAL TERMINATION%GOBP%GO:0006415	TRANSLATIONAL TERMINATION%GOBP%GO:0006415	0.0161463	0.144872	-1.5658	-1	GFM2,MRPL18,MRPS27,CHCHD1,MRPS33,MRPS23,MRPL1,MRPL13,MRPL58,MRPS25,MRPL4,MRPS12,MRPL32,N6AMT1,MRPS31,MRPS2,MRPL12,MRPS34,MRPS9,GSPT1,ABCE1,MRPL15,MRPL24,MRPL2,MRPL9,MRPS26,MRPL28
CELLULAR CALCIUM ION HOMEOSTASIS%GOBP%GO:0006874	CELLULAR CALCIUM ION HOMEOSTASIS%GOBP%GO:0006874	0.0163234	0.144994	1.37512	1	PTGER4,CCR7,CXCR3,SMAD3,CCRL2,LPAR1,CMKLR1,PSEN1,CX3CR1,CD40,CALM1,CAV2,CCR2,CCL1,C19orf12,CCR1,CCL3,GPR157,CCL23,SLC25A23,TMEM178A,PDPK1,C5AR2,MCUB,ANXA6,TPT1,GHRL,CAV1,CD55,FPR1,P2RX4,NPTN,HTT,SLC24A3,MCU,TMCO1,GPR35,TRPV1,WFS1,CD36,DMPK,DRD4,YWHAE,P2RY8,TPCN2
CYTOKINESIS%GOBP%GO:0000910	CYTOKINESIS%GOBP%GO:0000910	0.0163967	0.144994	1.44642	1	TRIM36,IST1,CHMP3,ARL3,CHMP2B,SNX9,STMN1,SPAST,BBS4,KLHDC8B,KIF23,CHMP1B,ECT2,RHOC,APC,ANLN,ALKBH4,SNX18,MITD1,RACGAP1,CHMP7,ANXA11,RASA1
ENTRY INTO CELL OF OTHER ORGANISM INVOLVED IN SYMBIOTIC INTERACTION%GOBP%GO:0051806	ENTRY INTO CELL OF OTHER ORGANISM INVOLVED IN SYMBIOTIC INTERACTION%GOBP%GO:0051806	0.0164282	0.144994	1.62516	1	CTNNB1,CD4,CAV2,CBL,SRC,AXL,SMPD1,WWP2,CAV1,ITGAV,CTNND1,TPCN2,NECTIN1
ENTRY INTO HOST CELL%GOBP%GO:0030260	ENTRY INTO HOST CELL%GOBP%GO:0030260	0.0164282	0.144994	1.62516	1	CTNNB1,CD4,CAV2,CBL,SRC,AXL,SMPD1,WWP2,CAV1,ITGAV,CTNND1,TPCN2,NECTIN1
ENTRY INTO HOST%GOBP%GO:0044409	ENTRY INTO HOST%GOBP%GO:0044409	0.0164282	0.144994	1.62516	1	CTNNB1,CD4,CAV2,CBL,SRC,AXL,SMPD1,WWP2,CAV1,ITGAV,CTNND1,TPCN2,NECTIN1
ENTRY INTO OTHER ORGANISM INVOLVED IN SYMBIOTIC INTERACTION%GOBP%GO:0051828	ENTRY INTO OTHER ORGANISM INVOLVED IN SYMBIOTIC INTERACTION%GOBP%GO:0051828	0.0164282	0.144994	1.62516	1	CTNNB1,CD4,CAV2,CBL,SRC,AXL,SMPD1,WWP2,CAV1,ITGAV,CTNND1,TPCN2,NECTIN1
LEISHMANIA INFECTION%REACTOME%R-HSA-9658195.2	LEISHMANIA INFECTION%REACTOME%R-HSA-9658195.2	0.0163501	0.144994	1.38544	1	PTGER4,MYO1C,ADAM17,TXNIP,CRK,C3,CDC42,ELMO2,FCGR2A,CALM1,ADRB2,NCK1,WIPF2,BAIAP2,IL18,MAPK1,RAC1,GNB5,CALCRL,GNG7,NFKB2,WASF2,ACTR2,MAPK14,NLRP3,GNG5,GNG2,GNAI3,ARPC2,P2RX4,GNAS,ABI1,GNAI2,ADCY7,ADORA2B,BRK1,LYN,MYO5A,MEFV,CASP1,MAPK3,GNB1,ENTPD1,HTR7,ARPC1A,VAV1,DPEP2
MATURATION OF SSU-RRNA FROM TRICISTRONIC RRNA TRANSCRIPT (SSU-RRNA, 5.8S RRNA, LSU-RRNA)%GOBP%GO:0000462	MATURATION OF SSU-RRNA FROM TRICISTRONIC RRNA TRANSCRIPT (SSU-RRNA, 5.8S RRNA, LSU-RRNA)%GOBP%GO:0000462	0.0162192	0.144994	-1.71804	-1	UTP3,NOP9,WDR46,TSR1,DHX37,UTP20,RRS1,NOL10,KRI1,TBL3,BMS1,RPP40,PWP2,HEATR1,UTP4
REGULATION OF CELL CYCLE G1/S PHASE TRANSITION%GOBP%GO:1902806	REGULATION OF CELL CYCLE G1/S PHASE TRANSITION%GOBP%GO:1902806	0.0164855	0.144994	1.38503	1	BTG2,CDKN1A,MDM2,ANXA1,ADAM17,MN1,CNOT4,ARID3A,CDK1,ID2,E2F7,CNOT8,CDC25C,RDX,SLFN11,E2F8,FAM83D,KANK2,RFWD3,CNOT6,APC,AURKA,MTBP,CNOT9,E2F1,WEE1,RB1,TFDP2,CCND3,JADE1,FHL1,LSM11,TMEM14B
REGULATION OF CYTOPLASMIC AND NUCLEAR SMAD2 3 SIGNALING%PATHWAY INTERACTION DATABASE NCI-NATURE CURATED DATA%REGULATION OF CYTOPLASMIC AND NUCLEAR SMAD2 3 SIGNALING	REGULATION OF CYTOPLASMIC AND NUCLEAR SMAD2 3 SIGNALING%PATHWAY INTERACTION DATABASE NCI-NATURE CURATED DATA%REGULATION OF CYTOPLASMIC AND NUCLEAR SMAD2 3 SIGNALING	0.0163122	0.144994	1.64647	1	SMAD3,SMAD4,PIAS4,KPNA2,MAPK1,CTDSP2,CTDSPL,PPM1A,NUP153
RETINOID METABOLISM AND TRANSPORT%REACTOME%R-HSA-975634.2	RETINOID METABOLISM AND TRANSPORT%REACTOME%R-HSA-975634.2	0.0164936	0.144994	1.6271	1	LDLR,LRP12,SDC4,GPC1
RNA PHOSPHODIESTER BOND HYDROLYSIS, ENDONUCLEOLYTIC%GOBP%GO:0090502	RNA PHOSPHODIESTER BOND HYDROLYSIS, ENDONUCLEOLYTIC%GOBP%GO:0090502	0.0164862	0.144994	-1.7321	-1	NOP9,TSR1,NYNRIN,RCL1,UTP20,RRS1,ELAC2,KRI1,DICER1,TBL3,BMS1,RPP40
HALLMARK_P53_PATHWAY%MSIGDB_C2%HALLMARK_P53_PATHWAY	HALLMARK_P53_PATHWAY%MSIGDB_C2%HALLMARK_P53_PATHWAY	0.0167729	0.146853	1.41311	1	BTG2,CDKN1A,MDM2,SERTAD3,TXNIP,S100A10,RNF19B,CSRNP2,TOB1,SESN1,MXD4,NUDT15,HMOX1,ADA,CCNG1,EI24,GM2A,ABHD4,BAIAP2,PTPRE,SOCS1,EPHX1,FOXO3,NINJ1,ANKRA2,DDIT4,PRKAB1,PPM1D,TRAFD1,IER5,DDB2
NEGATIVE REGULATION OF CELLULAR RESPONSE TO TRANSFORMING GROWTH FACTOR BETA STIMULUS%GOBP%GO:1903845	NEGATIVE REGULATION OF CELLULAR RESPONSE TO TRANSFORMING GROWTH FACTOR BETA STIMULUS%GOBP%GO:1903845	0.0168178	0.146853	1.51356	1	SMAD3,ADAM17,TGFBR2,ZBTB7A,CD109,SPRY1,FAM89B,PDPK1,TGFBR1,BCL9L,SMURF2,SKI,LEMD3,SPRED2,CAV1,PPM1A,ZNF451
OVERVIEW OF LEUKOCYTE-INTRINSIC HIPPO PATHWAY FUNCTIONS%WIKIPATHWAYS_20201210%WP4542%HOMO SAPIENS	OVERVIEW OF LEUKOCYTE-INTRINSIC HIPPO PATHWAY FUNCTIONS%WIKIPATHWAYS_20201210%WP4542%HOMO SAPIENS	0.0167368	0.146853	1.65838	1	CCR7,STK38L,MOB1A,LATS1,FOXO3,RAC1,MAPK14,RAB13,RAP1A
RIBONUCLEOPROTEIN COMPLEX LOCALIZATION%GOBP%GO:0071166	RIBONUCLEOPROTEIN COMPLEX LOCALIZATION%GOBP%GO:0071166	0.0167954	0.146853	-1.52547	-1	SRSF7,XPOT,NOP9,NUP107,CPSF1,NOL6,MAGOHB,SRSF1,DDX39A,XPO1,PRPF31,NUP50,NUP43,SEH1L,CPSF3,RRS1,SYMPK,DDX39B,NCBP1,NUP155,SMG7,U2AF1,THOC3,SRSF5,LTV1,THOC6,THOC1,MCM3AP,ABCE1,RAN,NXT1,PCID2,DDX19A,DHX38,SRSF3,NUP210,YTHDC1,SRSF2,SRSF9
CERAMIDE METABOLIC PROCESS%GOBP%GO:0006672	CERAMIDE METABOLIC PROCESS%GOBP%GO:0006672	0.0173041	0.150698	1.47739	1	ST3GAL1,DEGS2,ASAH1,SPTLC1,GM2A,ST3GAL5,UGCG,PLPP1,SGPL1,HEXB,SMPD1,B3GALT4,ST8SIA6
REGULATION OF P38-ALPHA AND P38-BETA%PATHWAY INTERACTION DATABASE NCI-NATURE CURATED DATA%REGULATION OF P38-ALPHA AND P38-BETA	REGULATION OF P38-ALPHA AND P38-BETA%PATHWAY INTERACTION DATABASE NCI-NATURE CURATED DATA%REGULATION OF P38-ALPHA AND P38-BETA	0.017316	0.150698	1.61391	1	DUSP10,CDC42,TRAF6,RIPK1,MAP3K3,SRC,RAC1,MAP2K3,MAPK14
ESTABLISHMENT OF ENDOTHELIAL BARRIER%GOBP%GO:0061028	ESTABLISHMENT OF ENDOTHELIAL BARRIER%GOBP%GO:0061028	0.0177041	0.153395	1.6703	1	ICAM1,PPP1R16B,PECAM1,RDX,RAP1B,F11R,RAP2C,RAPGEF1,RAP1A,RAB1A,MYADM,PDE4D,RAB1B,RAP2B,EZR,RAPGEF2,SOX18
NEGATIVE REGULATION OF CHROMOSOME ORGANIZATION%GOBP%GO:2001251	NEGATIVE REGULATION OF CHROMOSOME ORGANIZATION%GOBP%GO:2001251	0.017736	0.153395	-1.53264	-1	NAT10,SNCA,TOP2A,ZW10,WDR5,CENPF,SETMAR,HNRNPU,PINX1,SPHK2,PIF1,PHF8,BCOR,DNMT3B,ACD,NOC2L,TRIP13,PIH1D1
REGULATION OF CHOLESTEROL BIOSYNTHESIS BY SREBP (SREBF)%REACTOME%R-HSA-1655829.2	REGULATION OF CHOLESTEROL BIOSYNTHESIS BY SREBP (SREBF)%REACTOME%R-HSA-1655829.2	0.0177435	0.153395	1.49468	1	IDI1,MVK,HELZ2,SEC24B,MTF1,DHCR7,INSIG2,HMGCS1,NFYC,SREBF2,TGS1,FDFT1,FDPS,SEC23A,SC5D,LSS
REGULATION OF SMALL GTPASE MEDIATED SIGNAL TRANSDUCTION%GOBP%GO:0051056	REGULATION OF SMALL GTPASE MEDIATED SIGNAL TRANSDUCTION%GOBP%GO:0051056	0.0176738	0.153395	1.32427	1	DEPDC7,FLCN,TNFAIP1,ABCA1,A2M,SQSTM1,CDC42,LPAR1,ARHGAP25,ARHGEF5,RHOQ,ARHGAP1,ARHGAP12,SPRY1,SOS2,SRC,SPRY3,OCRL,RDX,RAC1,STMN1,ARHGEF3,F11R,PDCD10,ITGA3,GNA13,CRKL,KANK2,KCTD10,RHOV,RASGRP4,MAPRE2,RAPGEF1,FAM13B,ARHGEF7,MADD,ECT2,STARD8,FGD4,RHOC
DE NOVO PURINE BIOSYNTHESIS%PANTHER PATHWAY%P02738	DE NOVO PURINE BIOSYNTHESIS%PANTHER PATHWAY%P02738	0.0178506	0.154065	-1.72326	-1	PPAT,ATIC,IMPDH1,NME7,ADSL,IMPDH2,RRM2B,NME2,NME1
CELLULAR HOMEOSTASIS%GOBP%GO:0019725	CELLULAR HOMEOSTASIS%GOBP%GO:0019725	0.0179187	0.154397	1.2395	1	MT2A,MT1E,PTGER4,CCR7,NCF1,CXCR3,SMAD3,CCRL2,LPAR1,CMKLR1,MT-RNR2,PSEN1,SLC31A2,DEDD2,HMOX1,SMAD4,CX3CR1,CHP1,CD40,CALM1,MYC,ATP6V1A,CAV2,CCR2,FTH1,FTL,CCL1,C19orf12,CCR1,ATP6V1D,LRRC8A,CCL3,HEPH,GPR157,FBXL5,CCL23,CHMP2B,SLC25A23,ATP6V0D1,NCF2,NFE2L2,TMEM178A,PDPK1,TFRC,HVCN1,ATP6AP2,NQO1,RAB11B,TAOK1,C5AR2,MCUB,ATP6V1G1,SLC4A8,SLC9B1,RHAG,ANXA6,CLCN6,TPT1,GHRL,MTM1,GRN,CAV1,SLC40A1,LACC1,CD55,F…
POSITIVE REGULATION OF MEMBRANE PERMEABILITY%GOBP%GO:1905710	POSITIVE REGULATION OF MEMBRANE PERMEABILITY%GOBP%GO:1905710	0.0179651	0.154416	1.6445	1	BMF,BNIP3L,ATF2,PPIF
REGULATION OF INNATE IMMUNE RESPONSE%GOBP%GO:0045088	REGULATION OF INNATE IMMUNE RESPONSE%GOBP%GO:0045088	0.0180097	0.154416	1.26466	1	TNFAIP3,IRAK2,SOCS3,BCL10,NR1H2,IFNAR2,A2M,TRAF6,POLR3B,ZCCHC3,PIK3R4,TAB2,RELB,XIAP,TICAM1,CD40,SEC14L1,FCGR2B,RIPK1,FADD,BTRC,TIFA,TIRAP,IFNGR2,TRIM21,HSPA1B,BIRC3,SOCS1,SRC,PIAS1,TYROBP,IRF7,PDPK1,RNASEL,PSMD5,TANK,LILRA2,IRF1,TLR6,DDX58,TLR4,GBP5,SLC15A3,OTULIN,RPS6KA5,MAPKAPK2,TRAFD1,SFTPD,TLR7,CLEC10A,ICAM2,GRN,CAV1,LACC1,SERPING1,PSMD11,SLC15A4,PIK3AP1,IFIH1,AP1G1,TBK1,CARD11
SUMOYLATION OF INTRACELLULAR RECEPTORS%REACTOME%R-HSA-4090294.3	SUMOYLATION OF INTRACELLULAR RECEPTORS%REACTOME%R-HSA-4090294.3	0.0179852	0.154416	1.65479	1	NR4A2,NR1H2,AR,PIAS4,SUMO3,PIAS1,NR2C1
CARDIAC SEPTUM MORPHOGENESIS%GOBP%GO:0060411	CARDIAC SEPTUM MORPHOGENESIS%GOBP%GO:0060411	0.0184648	0.155504	1.60968	1	SEMA3C,TGFBR2,ACVR1,SMAD4,CITED2,TGFBR1,NOTCH1,SMAD6
CELL CYCLE ARREST%GOBP%GO:0007050	CELL CYCLE ARREST%GOBP%GO:0007050	0.0184195	0.155504	1.43284	1	CDKN1A,SMAD3,HBP1,RRAGC,ZBTB49,CAB39L,MYC,RRAGD,DHCR24,ING4,IRF1,DDIAS,TGFBR1,LAMTOR3,PRKAB1,THBS1,APC,CDK7,BARD1,PPM1A,NOTCH1,MCPH1,RB1,WDR6,TP53INP1
GPCR DOWNSTREAM SIGNALLING%REACTOME DATABASE ID RELEASE 75%388396	GPCR DOWNSTREAM SIGNALLING%REACTOME DATABASE ID RELEASE 75%388396	0.0184415	0.155504	1.2971	1	PTGER4,CCR7,LDLR,CXCR3,ANXA1,S1PR2,C3,CDC42,LPAR1,MT-RNR2,LRP12,GPR183,RGS2,MAPK7,RGS1,CX3CR1,ARHGEF5,RGS14,SDC4,PSAP,CALM1,ADRB2,CCR2,GNA12,CCL1,KPNA2,CCR1,SOS2,SRC,MAPK1,DHRS3,PDPK1,ARHGEF3,CAMK2A,GNB5,CALCRL,GNG7,CNR2,GNA13,RTP4,CAMK2G,PPP2CB,PLA2G4A,PDE3B,ADORA3,GNG5,ARHGEF7,GNG2,GPC1,ECT2,FGD4,GNAI3,RHOC,FPR1,DHRS9,GNAS,NAPEPLD,RGS12,GNAI2,ADCY7,PDE4D,ADORA2B,P2RY13
INTRACELLULAR STEROL TRANSPORT%GOBP%GO:0032366	INTRACELLULAR STEROL TRANSPORT%GOBP%GO:0032366	0.0182729	0.155504	1.67873	1	LDLR,NPC2,ABCA1,LDLRAP1,ABCG1,OSBPL2
NEGATIVE REGULATION OF DEVELOPMENTAL GROWTH%GOBP%GO:0048640	NEGATIVE REGULATION OF DEVELOPMENTAL GROWTH%GOBP%GO:0048640	0.0182722	0.155504	1.62506	1	CDKN1A,DUSP10,SEMA3C,SEMA4B,RNF6,VGLL4,GDF15,FGFR3,NKD1
NUCLEOBASE-CONTAINING SMALL MOLECULE INTERCONVERSION%GOBP%GO:0015949	NUCLEOBASE-CONTAINING SMALL MOLECULE INTERCONVERSION%GOBP%GO:0015949	0.018345	0.155504	-1.72485	-1	CTPS1,GLRX,TXNRD1,GSR,CMPK1,DUT,RRM2B,NME2,NME1,AK1,DCTD,DTYMK,AK4
PEPTIDE SECRETION%GOBP%GO:0002790	PEPTIDE SECRETION%GOBP%GO:0002790	0.0184499	0.155504	1.52614	1	ANXA1,ABCA1,TVP23B,TMEM167A,RAB12,CDK16,RAB11B,CAMK2G,DMTN,RCN3,SVBP,GHRL,RAB13,RAB1A,RAB3D,ARL4D
REGULATION OF CYTOKINE-MEDIATED SIGNALING PATHWAY%GOBP%GO:0001959	REGULATION OF CYTOKINE-MEDIATED SIGNALING PATHWAY%GOBP%GO:0001959	0.018447	0.155504	1.41859	1	ADAM17,TNFAIP3,IRAK2,SOCS3,NR1H2,IFNAR2,IL1RN,CD74,RIPK1,FADD,IFNGR2,SPATA2,HSPA1B,BIRC3,SOCS1,AXL,PIAS1,RNASEL
REGULATION OF MITOCHONDRIAL MEMBRANE PERMEABILITY INVOLVED IN APOPTOTIC PROCESS%GOBP%GO:1902108	REGULATION OF MITOCHONDRIAL MEMBRANE PERMEABILITY INVOLVED IN APOPTOTIC PROCESS%GOBP%GO:1902108	0.018264	0.155504	1.64166	1	BMF,BNIP3L,ATF2,CAMK2A
REGULATION OF SMOOTH MUSCLE CELL PROLIFERATION%GOBP%GO:0048660	REGULATION OF SMOOTH MUSCLE CELL PROLIFERATION%GOBP%GO:0048660	0.0181711	0.155504	1.50142	1	CDKN1A,TNFAIP3,CTNNB1,HMOX1,PDCD4,ID2,LDLRAP1,IL18,IL6R,TRIB1,THBS1
REGULATION OF TRANSCRIPTION REGULATORY REGION DNA BINDING%GOBP%GO:2000677	REGULATION OF TRANSCRIPTION REGULATORY REGION DNA BINDING%GOBP%GO:2000677	0.018357	0.155504	1.63788	1	PSEN1,TRAF6,ZBTB7A,GTF2B,CTNNB1,RB1,SIN3A
BIOCARTA_TNFR2_PATHWAY%MSIGDB_C2%BIOCARTA_TNFR2_PATHWAY	BIOCARTA_TNFR2_PATHWAY%MSIGDB_C2%BIOCARTA_TNFR2_PATHWAY	0.0185607	0.155808	1.67727	1	TNFAIP3,NFKBIA,RIPK1,TANK,TNFRSF1B
NEUROTRANSMITTER BIOSYNTHETIC PROCESS%GOBP%GO:0042136	NEUROTRANSMITTER BIOSYNTHETIC PROCESS%GOBP%GO:0042136	0.0185607	0.155808	1.65231	1	ALDH9A1,MOXD1,CYB5R3,CYP1B1,NQO1,DAGLB,HDC
BETA2 INTEGRIN CELL SURFACE INTERACTIONS%PATHWAY INTERACTION DATABASE NCI-NATURE CURATED DATA%BETA2 INTEGRIN CELL SURFACE INTERACTIONS	BETA2 INTEGRIN CELL SURFACE INTERACTIONS%PATHWAY INTERACTION DATABASE NCI-NATURE CURATED DATA%BETA2 INTEGRIN CELL SURFACE INTERACTIONS	0.0186358	0.156187	1.66506	1	C3,ICAM1,PLAUR,FCGR2A,F11R,ITGAX,ICAM2,PLAU
MITOCHONDRIAL TRANSLATION%REACTOME DATABASE ID RELEASE 75%5368287	MITOCHONDRIAL TRANSLATION%REACTOME DATABASE ID RELEASE 75%5368287	0.0186945	0.156427	-1.5686	-1	GFM2,MRPL18,MRPS27,CHCHD1,MRPS33,MRPS23,MRPL1,MRPL13,MRPL58,MRPS25,MRPL4,MRPS12,MRPL32,MRPS31,MRPS2,MRPL12,MRPS34,MTFMT,MRPS9,MRPL15,MRPL24,MRPL2,MRPL9,MRPS26,MRPL28
REGULATION OF TOR SIGNALING%GOBP%GO:0032006	REGULATION OF TOR SIGNALING%GOBP%GO:0032006	0.0187481	0.156625	1.46119	1	FLCN,RRAGC,SESN1,GPAT3,TMEM127,FNIP1,SIK3,SESN2,TNFAIP8L1,GNA12,TSC1,ARNTL,RRAGD,RICTOR,FAM83D,DDIT4,LAMTOR3,GPR137B
POSITIVE REGULATION OF STRESS-ACTIVATED MAPK CASCADE%GOBP%GO:0032874	POSITIVE REGULATION OF STRESS-ACTIVATED MAPK CASCADE%GOBP%GO:0032874	0.0187949	0.156765	1.45505	1	CCR7,NCF1,SDCBP,TRAF6,ARHGEF5,FCGR2B,RIPK1,TIRAP,SLAMF1,ZNF622,PDCD10,TLR6,RELL1,TAOK1,ARL6IP5,SPAG9,TNFRSF11A,MAP3K2,MAP2K7
ADAPTIVE IMMUNE RESPONSE%GOBP%GO:0002250	ADAPTIVE IMMUNE RESPONSE%GOBP%GO:0002250	0.0188492	0.156966	1.45777	1	HLA-DQB1,ADAM17,BCL10,CD74,GPR183,HLA-DRB1,FCGR2B,IL18,TLR4,TNFRSF11A,CD55
RESOLUTION OF ABASIC SITES (AP SITES)%REACTOME%R-HSA-73933.2	RESOLUTION OF ABASIC SITES (AP SITES)%REACTOME%R-HSA-73933.2	0.0189659	0.157686	-1.66001	-1	RPA2,TDG,NEIL2,NTHL1,XRCC1,POLD1,APEX1,POLB
TRANSLATION%GOBP%GO:0006412	TRANSLATION%GOBP%GO:0006412	0.0192811	0.160052	-1.37281	-1	GFM2,DHPS,MRPL18,EEF1E1,MRPS27,RRBP1,LARS2,EIF2S3,EIF4A1,CHCHD1,MRPS33,AARS2,EIF2B3,FARSA,MRPS23,MRPL1,RPL36A,PPA2,MRPL13,NARS2,DARS2,CARS2,MRPL58,EIF4G1,EIF2S1,FTSJ1,ZNF598,MRPS25,RBM4,EIF5,MRPL4,EIF2B1,EIF4A2,AIMP1,MRPS12,ZC3H15,EEFSEC,FARSB,ABCF1,FARS2,MRPL32,N6AMT1,NEMF,MRPS31,RPL26L1,DDX3X,MRPS2,MRPL12,EIF2B4,EIF2B2,MRPS34,TNIP1,MRPS9,GSPT1,RPL14
AUTOPHAGOSOME MATURATION%GOBP%GO:0097352	AUTOPHAGOSOME MATURATION%GOBP%GO:0097352	0.019424	0.160726	1.59834	1	ATG14,WIPI2,LAMP2,CHMP3,GABARAPL1,GABARAP,GABARAPL2,SNAP29,LIX1L,VTI1B,UBQLN1,EPG5,VPS33A
PID_IFNG_PATHWAY%MSIGDB_C2%PID_IFNG_PATHWAY	PID_IFNG_PATHWAY%MSIGDB_C2%PID_IFNG_PATHWAY	0.019424	0.160726	1.59822	1	CBL,SOCS1,MAPK1,PIAS1,CAMK2A,IRF1,CAMK2G,CRKL,RAPGEF1,RAP1A
CELLULAR RESPONSE TO PEPTIDE%GOBP%GO:1901653	CELLULAR RESPONSE TO PEPTIDE%GOBP%GO:1901653	0.0194798	0.160932	1.32364	1	MDM2,VIM,NR4A2,PSEN1,ICAM1,RAB12,FCGR2B,C2CD5,RHOQ,ATP6V1A,CAV2,ADRB2,INSR,BAIAP2,GAB1,ATP6V1D,SH2B2,NR4A1,SRC,ATP6V0D1,PIK3C2A,BCAR3,PDPK1,CAMK2A,TLR6,TLR4,PDE3B,ATP6V1G1,INSIG2,SORBS1,CAV1,RAB13,APC,ADCY7,ATP6V1C1,IGF1R,ATP6V1C2,LYN,MYO5A,CD36,PTPN22,LPIN1,DENND4C
ESC PLURIPOTENCY PATHWAYS%WIKIPATHWAYS_20201210%WP3931%HOMO SAPIENS	ESC PLURIPOTENCY PATHWAYS%WIKIPATHWAYS_20201210%WP3931%HOMO SAPIENS	0.0195266	0.161064	1.46519	1	MDM2,MAPK7,CTNNB1,ACVR1,SMAD4,FZD2,MAPK1,FGFR1,MAP2K3,ACTR2,FGFR3,APC,FZD4,IL6ST,SMAD6
INTERFERON ALPHA BETA SIGNALING%REACTOME DATABASE ID RELEASE 75%909733	INTERFERON ALPHA BETA SIGNALING%REACTOME DATABASE ID RELEASE 75%909733	0.0196307	0.161411	1.51956	1	IFIT2,SOCS3,IFIT3,MX1,MX2,SOCS1,GBP2,IRF7,IP6K2,RNASEL,IRF1,OAS2
RHO GTPASES ACTIVATE NADPH OXIDASES%REACTOME%R-HSA-5668599.6	RHO GTPASES ACTIVATE NADPH OXIDASES%REACTOME%R-HSA-5668599.6	0.0196098	0.161411	1.60395	1	NCF1,PIK3R4,MAPK1,NCF2,RAC1,MAPK14,CYBB,MAPK3
PLACENTA DEVELOPMENT%GOBP%GO:0001890	PLACENTA DEVELOPMENT%GOBP%GO:0001890	0.0198255	0.162756	1.6195	1	SPP1,E2F7,ADAM19,E2F8,GHRL,PPARD,PLK4,CASP8
HALLMARK_UV_RESPONSE_DN%MSIGDB_C2%HALLMARK_UV_RESPONSE_DN	HALLMARK_UV_RESPONSE_DN%MSIGDB_C2%HALLMARK_UV_RESPONSE_DN	0.0200754	0.164344	1.45546	1	MT1E,ANXA2,LDLR,TFPI,TGFBR2,FZD2,MYC,PRDM2,CITED2
SMALL MOLECULE BIOSYNTHETIC PROCESS%GOBP%GO:0044283	SMALL MOLECULE BIOSYNTHETIC PROCESS%GOBP%GO:0044283	0.0200819	0.164344	-1.36695	-1	ACOT7,LBR,FADS1,HK2,CTPS1,DHODH,PPIP5K2,TDG,SCD5,NEIL2,NTHL1,UNG,IMPDH1,LDHA,NAT8L,CBR1,GPT2,HK1,COQ2,PYCR1,XBP1,SLC39A14,UBIAD1,SPHK2,CMPK1,DUT,BDH1,MDH2,RFK,GLS,INSIG1,ACACA,NUS1,SORD,ALDH18A1,MTHFD1,LIAS,HACD2,ADAL,PGP,CAD,NT5M,OSBPL7,GGT5,ABCA2,SPHK1,QDPR,ELOVL6,IMPDH2
VITAMIN TRANSPORT%GOBP%GO:0051180	VITAMIN TRANSPORT%GOBP%GO:0051180	0.0201377	0.164542	-1.71789	-1	AMN,SLC2A8,SLC19A1,SCARB1,SLC5A6,SLC23A2,SLC22A5
REGULATION OF TELOMERE MAINTENANCE VIA TELOMERE LENGTHENING%GOBP%GO:1904356	REGULATION OF TELOMERE MAINTENANCE VIA TELOMERE LENGTHENING%GOBP%GO:1904356	0.0202761	0.165413	-1.61935	-1	NAT10,PRKCQ,TCP1,HNRNPU,CCT4,PINX1,MAP3K4,PIF1,MAPKAPK5,CCT2,ACD,CCT7,CCT6A,NAF1,ATR
APOPTOTIC PROCESS%GOBP%GO:0006915	APOPTOTIC PROCESS%GOBP%GO:0006915	0.0204762	0.165875	1.2563	1	BMF,IFIT2,CDKN1A,MDM2,SMAD3,TNFSF14,RRAGC,TNFAIP1,NFKBIA,BNIP3L,ATF2,TGFBR2,RNF41,DEDD2,TICAM1,IER3,RIPK1,PDCD4,MYC,LGALS12,FADD,C19orf12,PAK4,MX1,DAPK2,CD38,IL6R,TNFRSF10B,DHCR24,BCL3,TYROBP,PDPK1,GABARAP,ZNF622,SGPL1,CYP1B1,CAMK2A,PDCD10,MELK,KREMEN1,DNASE2,ING4,TNFRSF1B,IRF1,NLRP1,TAOK1,TLR4,ARL6IP5,PPP1R13B,DDIT4,FGFR3,EGLN3,NLRP3,MADD,HMGB2,ANXA6,FAS,CAV1,TP53BP2,PPARD,P2RX4,FXR1,CD2
FOLATE METABOLISM%WIKIPATHWAYS_20201210%WP176%HOMO SAPIENS	FOLATE METABOLISM%WIKIPATHWAYS_20201210%WP176%HOMO SAPIENS	0.0205393	0.165875	1.54215	1	LDLR,ABCA1,INSR,HBB,NFKB2,MTHFD2
METABOLIC REPROGRAMMING IN COLON CANCER%WIKIPATHWAYS_20201210%WP4290%HOMO SAPIENS	METABOLIC REPROGRAMMING IN COLON CANCER%WIKIPATHWAYS_20201210%WP4290%HOMO SAPIENS	0.0206508	0.165875	-1.71753	-1	RPIA,FH,FASN,MDH2,PDHA1,SDHB
MYD88:MAL(TIRAP) CASCADE INITIATED ON PLASMA MEMBRANE%REACTOME DATABASE ID RELEASE 75%166058	MYD88:MAL(TIRAP) CASCADE INITIATED ON PLASMA MEMBRANE%REACTOME DATABASE ID RELEASE 75%166058	0.0205393	0.165875	1.43858	1	IRAK2,NFKBIA,ATF2,MAPK7,TRAF6,TAB2,BTRC,TIRAP,SOCS1,MAPK1,MAP2K3,TLR6,PPP2CB,MEF2A,TLR4,NFKB2,PELI2,RPS6KA5,MAPK14,NKIRAS2,MAPKAPK2,NKIRAS1,S100B,MAP3K8,MAP2K7
NEUROMUSCULAR JUNCTION DEVELOPMENT%GOBP%GO:0007528	NEUROMUSCULAR JUNCTION DEVELOPMENT%GOBP%GO:0007528	0.0206508	0.165875	-1.71675	-1	PPFIBP1,DVL1,F2R,ZC4H2,SHANK1,SHANK3,DCTN1,CACNB3
PROTEIN CATABOLIC PROCESS%GOBP%GO:0030163	PROTEIN CATABOLIC PROCESS%GOBP%GO:0030163	0.0205587	0.165875	1.21933	1	ANXA2,MDM2,TNFAIP3,TNFAIP1,RNF4,RNF19B,KCTD21,SQSTM1,BNIP3L,CNOT4,RNF41,FBXO38,FBXL3,RNF111,KLHL20,RNF122,CTNNB1,CCNF,TOLLIP,RNF34,RNF185,RAB12,CDK1,RNF6,KCTD2,LAMP2,RNF130,RIPK1,DNAJB9,ZRANB1,FBXO8,ABHD10,BTRC,ASB2,CBL,VPS37A,ARNTL,RNF146,FBXL5,DTL,NTAN1,ABHD17B,NFE2L2,AREL1,PSMD5,SGSH,CTSO,RHBDD2,ARMC8,KCTD10,WWP2,SOCS6,KLHL3,FBXL18,MANBA,FBXO45,SMURF2,RNF13,DTX3L,RCN3,UBE2W,RNF144A,ERLEC1,FBXL…
REGULATION OF CYTOSOLIC CALCIUM ION CONCENTRATION%GOBP%GO:0051480	REGULATION OF CYTOSOLIC CALCIUM ION CONCENTRATION%GOBP%GO:0051480	0.0206285	0.165875	1.44874	1	PTGER4,CCR7,CXCR3,SMAD3,CCRL2,LPAR1,CMKLR1,CX3CR1,CALM1,CAV2,CCR2,CCL1,CCR1,CCL3,GPR157,TMEM178A,PDPK1,C5AR2,GHRL,CAV1,CD55,FPR1,P2RX4,NPTN,HTT
TOLL LIKE RECEPTOR 2 (TLR2) CASCADE%REACTOME%R-HSA-181438.1	TOLL LIKE RECEPTOR 2 (TLR2) CASCADE%REACTOME%R-HSA-181438.1	0.0205393	0.165875	1.43858	1	IRAK2,NFKBIA,ATF2,MAPK7,TRAF6,TAB2,BTRC,TIRAP,SOCS1,MAPK1,MAP2K3,TLR6,PPP2CB,MEF2A,TLR4,NFKB2,PELI2,RPS6KA5,MAPK14,NKIRAS2,MAPKAPK2,NKIRAS1,S100B,MAP3K8,MAP2K7
TOLL LIKE RECEPTOR TLR1:TLR2 CASCADE%REACTOME DATABASE ID RELEASE 75%168179	TOLL LIKE RECEPTOR TLR1:TLR2 CASCADE%REACTOME DATABASE ID RELEASE 75%168179	0.0205393	0.165875	1.43858	1	IRAK2,NFKBIA,ATF2,MAPK7,TRAF6,TAB2,BTRC,TIRAP,SOCS1,MAPK1,MAP2K3,TLR6,PPP2CB,MEF2A,TLR4,NFKB2,PELI2,RPS6KA5,MAPK14,NKIRAS2,MAPKAPK2,NKIRAS1,S100B,MAP3K8,MAP2K7
TOLL LIKE RECEPTOR TLR6:TLR2 CASCADE%REACTOME%R-HSA-168188.1	TOLL LIKE RECEPTOR TLR6:TLR2 CASCADE%REACTOME%R-HSA-168188.1	0.0205393	0.165875	1.43858	1	IRAK2,NFKBIA,ATF2,MAPK7,TRAF6,TAB2,BTRC,TIRAP,SOCS1,MAPK1,MAP2K3,TLR6,PPP2CB,MEF2A,TLR4,NFKB2,PELI2,RPS6KA5,MAPK14,NKIRAS2,MAPKAPK2,NKIRAS1,S100B,MAP3K8,MAP2K7
REGULATION OF APOPTOTIC SIGNALING PATHWAY%GOBP%GO:2001233	REGULATION OF APOPTOTIC SIGNALING PATHWAY%GOBP%GO:2001233	0.0208071	0.166873	1.30819	1	BMF,MDM2,TNFAIP3,NR4A2,BCL10,CD74,MAPK7,ICAM1,PLAUR,ACVR1,DEDD2,AR,HMOX1,CX3CR1,RNF34,TMEM102,EIF2AK3,TNFSF10,RIPK1,NCK1,FADD,DAPK2,HSPA1B,SRC,FGFR1,TNFRSF10B,NFE2L2,PTTG1IP,TIMP3,DDIAS,TGFBR1,PPP1R13B,THBS1,TMEM14A,TMBIM6,YWHAZ,MADD,TPT1,FAS,CAV1,CHCHD10,TP53BP2,BECN1,HTT
REGULATION OF MONONUCLEAR CELL MIGRATION%GOBP%GO:0071675	REGULATION OF MONONUCLEAR CELL MIGRATION%GOBP%GO:0071675	0.0209341	0.167634	1.5732	1	MOSPD2,CMKLR1,CCR2,CCL1,CCR1,MAPK1,THBS1,LGALS3,LYN,MAPK3,MDK,CCL5
REGULATION OF CATION TRANSMEMBRANE TRANSPORT%GOBP%GO:1904062	REGULATION OF CATION TRANSMEMBRANE TRANSPORT%GOBP%GO:1904062	0.0210434	0.16825	-1.48282	-1	ITGB1,SLC43A1,SNCA,FMR1,GSTO1,UBASH3B,GLRX,HOMER1,BIN1,F2R,SPHK2,VAMP2,SHANK1,ISCU,SHANK3,SLC30A1,RANGRF,AKAP9,MMP9,KCNAB2,JSRP1
POSTTRANSCRIPTIONAL REGULATION OF GENE EXPRESSION%GOBP%GO:0010608	POSTTRANSCRIPTIONAL REGULATION OF GENE EXPRESSION%GOBP%GO:0010608	0.0214199	0.170998	-1.30821	-1	ELAVL1,HNRNPD,NAT10,EXOSC8,FMR1,MRPS27,OGFOD1,NOLC1,EIF2S3,TSN,PUM3,XPO5,ADAR,HNRNPU,RPUSD3,JMJD4,PPP1R15B,DPH7,SERBP1,SYNCRIP,ZC3H7B,EIF1,PSMA8,EXOSC5,ROCK2,XPO1,TCOF1,HNRNPLL,CTIF,UBC,MAPKAPK5,MRPL13,PPP1R15A,FUS,ZC3H14,PSMD10,FTO,PSMB8,ILF3,RPS6KA1,EXOSC2,EIF4G1,EIF2S1,ZNF598,TNFSF13,NCL,RBM4,HSPA8,EIF5,DPH2,APEX1,DNAJC3,EIF2B1,EIF4A2,ROCK1,PSMB4,PSMB9,PSMA5,RPS6KB1,DPH3,EEFSEC,DICER1,NCBP1,NA…
CLATHRIN-MEDIATED ENDOCYTOSIS%REACTOME%R-HSA-8856828.3	CLATHRIN-MEDIATED ENDOCYTOSIS%REACTOME%R-HSA-8856828.3	0.0215387	0.171684	1.3835	1	LDLR,VAMP3,REPS2,CTTN,SYNJ2,CD4,SCARB2,RAB5A,ADRB2,LDLRAP1,CBL,SNX9,OCRL,PIK3C2A,SH3GL1,TFRC,NECAP1,PIP5K1C,FNBP1L,ACTR2,IL7R,STAM,COPS2,ARPC2,FZD4,STAM2,VAMP4,DAB2
TRNA MODIFICATION IN THE NUCLEUS AND CYTOSOL%REACTOME DATABASE ID RELEASE 75%6782315	TRNA MODIFICATION IN THE NUCLEUS AND CYTOSOL%REACTOME DATABASE ID RELEASE 75%6782315	0.0216554	0.17235	-1.62408	-1	CTU2,TRIT1,DUS2,TRMT61A,TRMT1,METTL1,NSUN6,QTRT1,FTSJ1,ADAT2,NSUN2,CDKAL1,TYW1,OSGEP
TUBE DEVELOPMENT%GOBP%GO:0035295	TUBE DEVELOPMENT%GOBP%GO:0035295	0.02188	0.173873	1.25264	1	ANXA2,ITGA5,BCL10,CHI3L1,TGFBR2,AGR2,CTNNB1,ACVR1,HMOX1,HOXA1,EIF2AK3,MYC,ID2,E2F7,CLIC4,GAB1,IL18,CDH2,CITED2,NR4A1,MTSS1,SRC,E2F8,CYP1B1,ATP6AP2,CALCRL,ITGA3,ARL13B,BBS4,TGFBR1,ERRFI1,OTULIN,KLHL3,STIL,PRICKLE1,LUZP1,THBS1,SAT1,RCN3,CHD8,AGGF1,PHACTR4,SFTPD,SKI,GATA2,BCAS3,KDM2B,CAV1,ADIPOR2,EFNB2
PANCREAS DEVELOPMENT%GOBP%GO:0031016	PANCREAS DEVELOPMENT%GOBP%GO:0031016	0.0220138	0.174669	1.65714	1	ANXA1,EIF2AK3,CDH2,RFX3,IL6R,FOXA2
DOWNREGULATION OF SMAD2 3:SMAD4 TRANSCRIPTIONAL ACTIVITY%REACTOME%R-HSA-2173795.1	DOWNREGULATION OF SMAD2 3:SMAD4 TRANSCRIPTIONAL ACTIVITY%REACTOME%R-HSA-2173795.1	0.0221751	0.175682	1.62107	1	SMAD3,TGIF2,RNF111,SMAD4,SMURF2,SKI,TRIM33,PPM1A,SKIL,UBE2D1
REGULATION OF PROTEIN TYROSINE KINASE ACTIVITY%GOBP%GO:0061097	REGULATION OF PROTEIN TYROSINE KINASE ACTIVITY%GOBP%GO:0061097	0.0222644	0.176122	1.50421	1	NCF1,ADAM17,CBL,SRC,SH3BP5L,RAP2C,ERRFI1,SOCS4,SOCS5,CAV1,EFNA1,CBLB,LILRB4,RAP2B,SNX6,UNC119,PRNP
FATTY ACID DERIVATIVE METABOLIC PROCESS%GOBP%GO:1901568	FATTY ACID DERIVATIVE METABOLIC PROCESS%GOBP%GO:1901568	0.0224086	0.176994	-1.53333	-1	ACOT7,FADS1,ACSL4,SCD5,CBR1,FAAH,FASN,GCDH,CES2,BDH1,FAR2,ACACA,HACD2,GGT5,ELOVL6,ACSF3
NEGATIVE REGULATION OF HYDROLASE ACTIVITY%GOBP%GO:0051346	NEGATIVE REGULATION OF HYDROLASE ACTIVITY%GOBP%GO:0051346	0.0225195	0.177601	1.37726	1	ZFYVE1,ANXA1,SORL1,CSRNP2,RGS2,MAPK7,MASTL,PLAUR,PTX3,ARL6IP1,FNIP1,RNF34,CHP1,XIAP,CST3,TIMP2,TSC1,BIRC3,SRC,IGBP1,DHCR24,RDX,SERPINF1,CSTB,F11R,CAMK2A,SERPINB8,TIMP3
ERBB SIGNALING PATHWAY%GOBP%GO:0038127	ERBB SIGNALING PATHWAY%GOBP%GO:0038127	0.0227678	0.179287	1.53851	1	ADAM17,REPS2,GAB1,CBL,SRC,MAPK1,PIK3C2A,PDPK1,IQGAP1,RPS6KA5
REGULATION OF CHROMOSOME ORGANIZATION%GOBP%GO:0033044	REGULATION OF CHROMOSOME ORGANIZATION%GOBP%GO:0033044	0.0230061	0.180619	-1.35933	-1	TADA2B,HNRNPD,NAT10,SNCA,FMR1,TOP2A,PRKCQ,ZW10,TCP1,WDR5,CENPF,SETMAR,HNRNPU,CCT4,PINX1,MAP3K4,CENPE,SPHK2,ARRB1,PIF1,MAPKAPK5,CENPV,TTLL12,CCT2,PHF8,CAMK1,BCOR,TRIM28,GNL3,PARP10,DNMT3B,ACD,DDX11,NOC2L,CCT7,TRIP13,CCT6A,XRCC3,GTF2H2,PIH1D1,PRKD2,RUVBL2,CDK5RAP2,ANAPC7,ANAPC1,NAF1,ATR,RPS6KA4,C6orf89,NAA10,KDM1A
SECOND-MESSENGER-MEDIATED SIGNALING%GOBP%GO:0019932	SECOND-MESSENGER-MEDIATED SIGNALING%GOBP%GO:0019932	0.0229946	0.180619	1.35694	1	PTGER4,CCR7,CXCR3,ABCA1,S1PR2,CCRL2,LPAR1,ADGRD1,MAPK7,CX3CR1,ADGRE5,EIF2AK3,CALM1,ADRB2,CCR2,CCR1,CCL3,NFATC1,PDPK1,CALCRL,CNR2,GNA13,ADGRG5
POSITIVE REGULATION OF INTERLEUKIN-6 PRODUCTION%GOBP%GO:0032755	POSITIVE REGULATION OF INTERLEUKIN-6 PRODUCTION%GOBP%GO:0032755	0.0231856	0.181754	1.5002	1	BCL10,CD74,TIRAP,TNFSF4,IL6R,TYROBP,CLEC7A,LILRA2,TLR6,DDX58,TLR4,TLR7,IFIH1,IL16
RESPONSE TO HORMONE%GOBP%GO:0009725	RESPONSE TO HORMONE%GOBP%GO:0009725	0.0234007	0.183165	1.27165	1	PTGER4,CCR7,ANXA1,SPP1,NR4A2,TFPI,IL1RN,KDM3A,CTNNB1,RARG,AR,RAB12,C2CD5,TIMP2,RHOQ,ATP6V1A,CAV2,UGCG,INSR,TSC1,BAIAP2,GAB1,PLPP1,ADAM9,ATP6V1D,TNFSF4,SH2B2,NR4A1,SRC,ATP6V0D1,PIK3C2A,LATS1,BCAR3,RDX,PDPK1,CAMK2A,TIMP3,BBS4,RBFOX2,ZFP36L2,THBS1,PDE3B,ATP6V1G1,INSIG2,GNG2,FAM210B,SORBS1,GHRL,ADIPOR1,CAV1,RAB13,ADIPOR2,APC,PPARD,NOTCH1,ADCY7,STAT4,ATP6V1C1,TRIP4,IGF1R,ATP6V1C2,LYN,MYO5A,CTSB,EPM2AI…
BIOCARTA_ATM_PATHWAY%MSIGDB_C2%BIOCARTA_ATM_PATHWAY	BIOCARTA_ATM_PATHWAY%MSIGDB_C2%BIOCARTA_ATM_PATHWAY	0.0235619	0.18415	1.61672	1	CDKN1A,MDM2,NFKBIA
POSITIVE REGULATION OF TELOMERE MAINTENANCE%GOBP%GO:0032206	POSITIVE REGULATION OF TELOMERE MAINTENANCE%GOBP%GO:0032206	0.0236243	0.184362	-1.63248	-1	HNRNPD,PRKCQ,TCP1,CCT4,MAP3K4,MAPKAPK5,CCT2,GNL3,ACD,CCT7,CCT6A,NAF1,ATR
CERAMIDE BIOSYNTHETIC PROCESS%GOBP%GO:0046513	CERAMIDE BIOSYNTHETIC PROCESS%GOBP%GO:0046513	0.0238734	0.186027	1.57693	1	ST3GAL1,DEGS2,ASAH1,SPTLC1,ST3GAL5,UGCG,SMPD1,B3GALT4,ST8SIA6
AMINO ACID TRANSMEMBRANE TRANSPORT%GOBP%GO:0003333	AMINO ACID TRANSMEMBRANE TRANSPORT%GOBP%GO:0003333	0.024008	0.186241	-1.63951	-1	SLC25A15,SLC25A22,SLC7A1,SLC38A5,SLC38A9,SLC7A5,SLC1A5,SLC38A10,SLC3A2,SLC38A1
RIBONUCLEOSIDE DIPHOSPHATE METABOLIC PROCESS%GOBP%GO:0009185	RIBONUCLEOSIDE DIPHOSPHATE METABOLIC PROCESS%GOBP%GO:0009185	0.024008	0.186241	-1.63966	-1	HK2,LDHA,HK1,CMPK1,TPI1,ENTPD7,GAPDH,PKM,NUDT18,PFKL,PFKM,ENO1,ENO3,ALDOA,NUDT16
TYPE II INTERFERON SIGNALING (IFNG)%WIKIPATHWAYS_20201210%WP619%HOMO SAPIENS	TYPE II INTERFERON SIGNALING (IFNG)%WIKIPATHWAYS_20201210%WP619%HOMO SAPIENS	0.0239374	0.186241	1.6154	1	IFIT2,SOCS3,IFNGR2,SOCS1,IRF1,GBP1,IRF4,CYBB,IRF2,HLA-B
MITOTIC G2 DNA DAMAGE CHECKPOINT%GOBP%GO:0007095	MITOTIC G2 DNA DAMAGE CHECKPOINT%GOBP%GO:0007095	0.024301	0.188233	1.63744	1	CDKN1A,CDK1,TAOK1,FOXN3
TRANS-GOLGI NETWORK VESICLE BUDDING%REACTOME%R-HSA-199992.3	TRANS-GOLGI NETWORK VESICLE BUDDING%REACTOME%R-HSA-199992.3	0.0244296	0.188949	1.40093	1	FTH1,FTL,SNX9,OCRL,PIK3C2A,GBF1,SH3D19,TFRC,DNASE2,NECAP1,ACBD3,GNS,SNAPIN,AP1G1,AP1S3,BLOC1S3,CLTA,AP3B1,TGOLN2,AP1S2,RAB5C,PICALM,YIPF6,BLOC1S1,IGF2R,TPD52,M6PR,DNAJC6,CLTC,CLINT1
LUNG FIBROSIS%WIKIPATHWAYS_20201210%WP3624%HOMO SAPIENS	LUNG FIBROSIS%WIKIPATHWAYS_20201210%WP3624%HOMO SAPIENS	0.0245248	0.189404	1.6131	1	MT2A,PTX3,HMOX1,CCR2,CCL3,NFE2L2
ARYL HYDROCARBON RECEPTOR NETPATH%WIKIPATHWAYS_20201210%WP2586%HOMO SAPIENS	ARYL HYDROCARBON RECEPTOR NETPATH%WIKIPATHWAYS_20201210%WP2586%HOMO SAPIENS	0.0247218	0.189898	1.49969	1	CDKN1A,MYC,CCL1,SRC,MAPK1,NFE2L2,CYP1B1,NQO1,PTGS2
HALLMARK_KRAS_SIGNALING_UP%MSIGDB_C2%HALLMARK_KRAS_SIGNALING_UP	HALLMARK_KRAS_SIGNALING_UP%MSIGDB_C2%HALLMARK_KRAS_SIGNALING_UP	0.0247731	0.189898	1.3921	1	ADAM17,TNFAIP3,CROT,TFPI,IL10RA,CMKLR1,CSF2RA,PRELID3B,PLAUR,PECAM1,TRIB2,ABCB1,ID2,GALNT3,CBL,BIRC3,TRIB1,TNFRSF1B,MMD,PTGS2
PLATELET DEGRANULATION%GOBP%GO:0002576	PLATELET DEGRANULATION%GOBP%GO:0002576	0.0246453	0.189898	1.42835	1	A2M,CDC37L1,PECAM1,LAMP2,PSAP,CD109,GTPBP2,CALM1,ANXA5,BRPF3,LHFPL2,VCL,SRGN,LGALS3BP,TIMP3,APLP2,FAM3C,THBS1,DMTN,TOR4A,SERPING1,LYN,CD36,ECM1,TAGLN2,WDR1
POSITIVE REGULATION OF CELL-SUBSTRATE ADHESION%GOBP%GO:0010811	POSITIVE REGULATION OF CELL-SUBSTRATE ADHESION%GOBP%GO:0010811	0.0248073	0.189898	1.42935	1	CCR7,S100A10,CRK,PLEKHA2,RRAS,CDC42,AGR2,TSC1,RAC1,CRKL,DMTN,EPHA1,ARHGEF7,UTRN,MYADM
POSITIVE REGULATION OF CYTOKINE PRODUCTION INVOLVED IN IMMUNE RESPONSE%GOBP%GO:0002720	POSITIVE REGULATION OF CYTOKINE PRODUCTION INVOLVED IN IMMUNE RESPONSE%GOBP%GO:0002720	0.0247218	0.189898	1.50176	1	BCL10,CD74,TRAF6,TICAM1,IL18,TNFSF4,DDX58,B2M,NLRP3
PROTEIN-DNA COMPLEX SUBUNIT ORGANIZATION%GOBP%GO:0071824	PROTEIN-DNA COMPLEX SUBUNIT ORGANIZATION%GOBP%GO:0071824	0.0247525	0.189898	-1.46816	-1	ANP32E,TAF12,RPA2,MCM6,SUPT16H,CCNH,CENPF,MCM4,SMARCC2,RUVBL1,CENPE,GTF2H3,ERCC2,CABIN1,DR1,UBC,RAD51C,CENPV,CENPT
INSULIN PATHWAY%PATHWAY INTERACTION DATABASE NCI-NATURE CURATED DATA%INSULIN PATHWAY	INSULIN PATHWAY%PATHWAY INTERACTION DATABASE NCI-NATURE CURATED DATA%INSULIN PATHWAY	0.0248728	0.19012	1.51035	1	CRK,SGK1,RHOQ,NCK1,INSR,CBL,SH2B2,FOXO3,EXOC1,PDPK1,RAPGEF1,SORBS1,CAV1
MRNA TRANSPORT%GOBP%GO:0051028	MRNA TRANSPORT%GOBP%GO:0051028	0.0252951	0.193065	-1.47575	-1	SRSF7,FMR1,NUP107,CPSF1,MAGOHB,SRSF1,DDX39A,NUP50,NUP43,SEH1L,CPSF3,SYMPK,DDX39B,ARC,NCBP1,NUP155,SMG7,U2AF1,THOC3,SRSF5,THOC6,THOC1,MCM3AP,NXT1,PCID2,DDX19A,DHX38,SRSF3,NUP210,YTHDC1,SRSF2,SRSF9
POSITIVE REGULATION OF BLOOD VESSEL ENDOTHELIAL CELL MIGRATION%GOBP%GO:0043536	POSITIVE REGULATION OF BLOOD VESSEL ENDOTHELIAL CELL MIGRATION%GOBP%GO:0043536	0.0256424	0.195421	1.59418	1	ANXA1,ADAM17,HMOX1,CD40,MAP3K3,FGFR1,PIK3C2A,PDPK1,MAP2K3,PTGS2,THBS1,MAPK14,GATA2,P2RX4
T CELL ACTIVATION INVOLVED IN IMMUNE RESPONSE%GOBP%GO:0002286	T CELL ACTIVATION INVOLVED IN IMMUNE RESPONSE%GOBP%GO:0002286	0.0256788	0.195421	1.61922	1	PTGER4,CD74,GPR183,ICAM1
GRANULOCYTE CHEMOTAXIS%GOBP%GO:0071621	GRANULOCYTE CHEMOTAXIS%GOBP%GO:0071621	0.0259494	0.197193	1.59278	1	ANXA1,CCL3L3,CCL24,CCL1,CCL3,CCL23,GBF1,PIP5K1C
NEGATIVE REGULATION OF MAP KINASE ACTIVITY%GOBP%GO:0043407	NEGATIVE REGULATION OF MAP KINASE ACTIVITY%GOBP%GO:0043407	0.0260751	0.19786	1.45459	1	DUSP10,SORL1,RGS2,RGS14,PDCD4,SPRY1,AIDA,SPRY3,SMPD1,DUSP5,SPRED2,CAV1
LXR-MEDIATED SIGNALING%REACTOME DATABASE ID RELEASE 75%9024446	LXR-MEDIATED SIGNALING%REACTOME DATABASE ID RELEASE 75%9024446	0.0263168	0.199114	1.57811	1	NR1H2,ABCA1,EEPD1,TNRC6C,KDM3A,TNRC6A,ABCG1,TNRC6B
PID_INSULIN_PATHWAY%MSIGDB_C2%PID_INSULIN_PATHWAY	PID_INSULIN_PATHWAY%MSIGDB_C2%PID_INSULIN_PATHWAY	0.0263168	0.199114	1.57681	1	CRK,SGK1,NCK1,INSR,CBL,SH2B2,FOXO3,EXOC1,PDPK1,RAPGEF1
REGULATION OF DNA BIOSYNTHETIC PROCESS%GOBP%GO:2000278	REGULATION OF DNA BIOSYNTHETIC PROCESS%GOBP%GO:2000278	0.026643	0.20129	-1.53884	-1	HNRNPD,NAT10,PRKCQ,CERS1,TCP1,HGF,HNRNPU,CCT4,PINX1,MAP3K4,CHTF18,PIF1,MAPKAPK5,KLF4,CCT2,ACD,CCT7,CCT6A,PRKD2,NAF1,HSP90AA1,ATR
REGULATION OF CELLULAR PROTEIN CATABOLIC PROCESS%GOBP%GO:1903362	REGULATION OF CELLULAR PROTEIN CATABOLIC PROCESS%GOBP%GO:1903362	0.0269972	0.203671	1.31909	1	ANXA2,LDLR,MDM2,SDCBP,RNF19B,NUDT15,TMTC3,RNF185,TRIB2,GNA12,VGLL4,RYBP,HSPA1B,PIAS1,NFE2L2,LATS1,TRIB1,PTTG1IP,RDX,PRICKLE1,CSNK1D,RNF144A,ERLEC1,SOCS5,HECTD1,ATRAID,WAC,CAV1,DAB2,WDR91,EFNA1,RNF19A,CSNK1A1,RNF144B
ISOPRENOID METABOLIC PROCESS%GOBP%GO:0006720	ISOPRENOID METABOLIC PROCESS%GOBP%GO:0006720	0.0271154	0.204267	1.43034	1	IDI1,MVK,SDC4,SCPEP1,DHRS3,CYP1B1,HMGCR,HMGCS1,GPC1,FDFT1,FDPS,DHRS9,NAPEPLD
NEGATIVE REGULATION OF CYTOKINE PRODUCTION%GOBP%GO:0001818	NEGATIVE REGULATION OF CYTOKINE PRODUCTION%GOBP%GO:0001818	0.0272737	0.204867	1.33291	1	PTGER4,CCR7,ANXA1,TNFAIP3,HAVCR2,CMKLR1,HLA-DRB1,CX3CR1,RELB,TRIB2,FCGR2B,PDCD4,ABCD1,SLAMF1,TNFSF4,AXL,BCL3,TYROBP,RAC1,CD84,SRGN,TLR6,DDX58,TLR4,C5AR2,THBS1,RPS6KA5,SFTPD,NLRP3
PID_CXCR3_PATHWAY%MSIGDB_C2%PID_CXCR3_PATHWAY	PID_CXCR3_PATHWAY%MSIGDB_C2%PID_CXCR3_PATHWAY	0.0272536	0.204867	1.55794	1	CXCR3,SRC,MAPK1,PDPK1,MAP2K3,RICTOR,MAPK14,GNG2,GNAI3,MAPK3,GNB1,RAF1
RMTS METHYLATE HISTONE ARGININES%REACTOME DATABASE ID RELEASE 75%3214858	RMTS METHYLATE HISTONE ARGININES%REACTOME DATABASE ID RELEASE 75%3214858	0.0274254	0.20571	-1.69096	-1	CCND1,WDR5,SMARCC2,PBRM1,PRMT7,DNMT3A,PRMT5
POSITIVE REGULATION OF ENDOTHELIAL CELL MIGRATION%GOBP%GO:0010595	POSITIVE REGULATION OF ENDOTHELIAL CELL MIGRATION%GOBP%GO:0010595	0.0275927	0.206371	1.41811	1	ANXA1,ADAM17,RRAS,HMOX1,CD40,MAP3K3,FGFR1,PIK3C2A,RAC1,PDPK1,MAP2K3,PTGS2,THBS1,MAPK14,GATA2,BCAS3,GRN,P2RX4
REGULATION OF RESPONSE TO BIOTIC STIMULUS%GOBP%GO:0002831	REGULATION OF RESPONSE TO BIOTIC STIMULUS%GOBP%GO:0002831	0.0275927	0.206371	1.40524	1	MICB,TNFAIP3,FBXO38,HLA-DRB1,ZCCHC3,SEC14L1,OPTN,BIRC3,TRIB1,LILRA2,DDX58,DTX3L,GRN,CD55,TRAF3IP2,CD180,CD36,TIGAR,PTPN22,SIN3A
PATTERN RECOGNITION RECEPTOR SIGNALING PATHWAY%GOBP%GO:0002221	PATTERN RECOGNITION RECEPTOR SIGNALING PATHWAY%GOBP%GO:0002221	0.0279117	0.208458	1.36978	1	TNFAIP3,IRAK2,BCL10,TRAF6,PIK3R4,TAB2,TICAM1,CD40,RIPK1,FADD,TIFA,TIRAP,BIRC3,IRF7,TANK,TLR6,DDX58,TLR4,OTULIN,MAPKAPK2,SFTPD,TLR7,LACC1,PIK3AP1,IFIH1,TBK1,CASP8,CTSB,CD36
REGULATION OF DNA-BINDING TRANSCRIPTION FACTOR ACTIVITY%GOBP%GO:0051090	REGULATION OF DNA-BINDING TRANSCRIPTION FACTOR ACTIVITY%GOBP%GO:0051090	0.0279564	0.208493	1.24791	1	SMAD3,TNFAIP3,IRAK2,BCL10,HAVCR2,TRIM38,NFKBIA,ATF2,CMKLR1,TRAF6,ZBTB7A,BHLHE40,SGK1,CTNNB1,AR,HMOX1,CX3CR1,ARHGEF5,CHP1,TAB2,TICAM1,CD40,FZD2,RIPK1,ID2,BTRC,ARID5B,TIRAP,ZNF431,TRIM21,TRIM62,IL18,CTNNBIP1,TNFSF4,HSPA1B,CAMK1D,MAPK1,MTPN,TRIM37,TRIB1,TFRC,CYP1B1,CAMK2A,TLR6,SGK3,DDX58,TLR4,SUFU,NFKB2,OTULIN,WWP2,CEBPG,CRTC2,RPS6KA5,MAPK14,ADORA3,NLRP3,FOXA2,TRIM22,CAV1,TNFRSF11A,G3BP2,TRIM13,COMM…
PI3K AKT SIGNALING%REACTOME%R-HSA-1257604.9	PI3K AKT SIGNALING%REACTOME%R-HSA-1257604.9	0.028079	0.209109	1.27966	1	CDKN1A,MDM2,RRAGC,CD86,TNRC6C,ATF2,TRAF6,TNRC6A,MKRN1,XIAP,IER3,INSR,GAB1,RNF146,NR4A1,PHLPP1,SRC,MAPK1,RRAGD,FOXO3,RAC1,GATAD2B,PDPK1,RICTOR,CBX2,PSMD5,TNRC6B,EED,PPP2CB,PIP5K1C,WWP2,LAMTOR3
PID_TGFBR_PATHWAY%MSIGDB_C2%PID_TGFBR_PATHWAY	PID_TGFBR_PATHWAY%MSIGDB_C2%PID_TGFBR_PATHWAY	0.0281311	0.209197	1.56647	1	TGFBR2,RNF111,CTNNB1,SMAD4,PDPK1,CAMK2A,ZFYVE16,TGFBR1,SMURF2,PPP2R2A,FKBP1A,SKIL,MAP3K7
MONOSACCHARIDE CATABOLIC PROCESS%GOBP%GO:0046365	MONOSACCHARIDE CATABOLIC PROCESS%GOBP%GO:0046365	0.0282486	0.209474	-1.61693	-1	HK2,HK1,SORD,GALK1,XYLB,TPI1,FUT8,KHK,GAPDH,PKM,PFKL,PFKM,FUT6,ENO1,ENO3,ALDOA,TKFC
POSTTRANSLATIONAL REGULATION OF ADHERENS JUNCTION STABILITY AND DISSASSEMBLY%PATHWAY INTERACTION DATABASE NCI-NATURE CURATED DATA%POSTTRANSLATIONAL REGULATION OF ADHERENS JUNCTION STABILITY AND DISSASSEMBLY	POSTTRANSLATIONAL REGULATION OF ADHERENS JUNCTION STABILITY AND DISSASSEMBLY%PATHWAY INTERACTION DATABASE NCI-NATURE CURATED DATA%POSTTRANSLATIONAL REGULATION OF ADHERENS JUNCTION STABILITY AND DISSASSEMBLY	0.0282307	0.209474	1.57007	1	CDC42,CTNNB1,RAB5A,GNA12,CDH2,SRC,RAC1,IQGAP1,GNA13,IGF1R,CTNND1,JUP,CTNNA1,SNX1,ABL1,CREBBP,RAB7A,CABLES1,ZBTB33
INNATE IMMUNE RESPONSE-ACTIVATING SIGNAL TRANSDUCTION%GOBP%GO:0002758	INNATE IMMUNE RESPONSE-ACTIVATING SIGNAL TRANSDUCTION%GOBP%GO:0002758	0.0284025	0.210045	1.30964	1	TNFAIP3,IRAK2,BCL10,TRAF6,PIK3R4,TAB2,RELB,TICAM1,CD40,RIPK1,FADD,BTRC,TIFA,TIRAP,BIRC3,SRC,TYROBP,IRF7,PDPK1,PSMD5,TANK,LILRA2,TLR6,DDX58,TLR4,OTULIN,RPS6KA5,MAPKAPK2,SFTPD,TLR7,CLEC10A,ICAM2,LACC1,PSMD11,PIK3AP1,IFIH1,TBK1,CARD11,CASP8,LYN,CTSB,CD36
NEGATIVE REGULATION OF LEUKOCYTE PROLIFERATION%GOBP%GO:0070664	NEGATIVE REGULATION OF LEUKOCYTE PROLIFERATION%GOBP%GO:0070664	0.0284062	0.210045	1.5821	1	TNFAIP3,CD86,HLA-DRB1,SDC4,FCGR2B,DLG5,TYROBP,SFTPD,RC3H1,LYN,LILRB4,LILRB2
LIPOSACCHARIDE METABOLIC PROCESS%GOBP%GO:1903509	LIPOSACCHARIDE METABOLIC PROCESS%GOBP%GO:1903509	0.0286724	0.211713	1.42753	1	ST3GAL1,ASAH1,PSAP,GM2A,ST3GAL5,UGCG,CTSA,HEXB,SMPD1,B3GALT4,ST8SIA6,FUCA1,AOAH,SUMF1,CERK,GALC,NEU1,PIGT,ST3GAL6,ESYT2,PIGW,ARSA,PIGS,MPPE1,NEU4,CPTP,PIGG,B3GNT5
AMINOGLYCAN CATABOLIC PROCESS%GOBP%GO:0006026	AMINOGLYCAN CATABOLIC PROCESS%GOBP%GO:0006026	0.0287735	0.211859	1.4916	1	CHI3L1,SDC4,CHP1,ARSB,HEXB,SGSH,GNS,FUCA1,GPC1,CSPG4
NEUTROPHIL MIGRATION%GOBP%GO:1990266	NEUTROPHIL MIGRATION%GOBP%GO:1990266	0.0287735	0.211859	1.49136	1	CCL3L3,PECAM1,CCL24,CCL1,CCL3,CCL23,GBF1,PIP5K1C,UMODL1,LGALS3,FCER1G,CCL5,PIKFYVE,PDE4B,IRAK4,CXCL8,SRP54,PRTN3,CXCL3
POSITIVE REGULATION OF FATTY ACID METABOLIC PROCESS%GOBP%GO:0045923	POSITIVE REGULATION OF FATTY ACID METABOLIC PROCESS%GOBP%GO:0045923	0.0288625	0.211961	1.59398	1	ANXA1,NR1H2,CD74,ABCD1,PTGS2,PPARD,ELOVL5
REGULATORY CIRCUITS OF THE STAT3 SIGNALING PATHWAY%WIKIPATHWAYS_20201210%WP4538%HOMO SAPIENS	REGULATORY CIRCUITS OF THE STAT3 SIGNALING PATHWAY%WIKIPATHWAYS_20201210%WP4538%HOMO SAPIENS	0.0288687	0.211961	1.47219	1	SOCS3,IFNAR2,IL10RA,MAPK7,CSF2RA,IFNGR2,SRC,IL6R,MAPK1,IL3RA,RICTOR,CSF2RB,IL21R,MAPK14,IL7R
REGULATION OF MEMBRANE PROTEIN ECTODOMAIN PROTEOLYSIS%GOBP%GO:0051043	REGULATION OF MEMBRANE PROTEIN ECTODOMAIN PROTEOLYSIS%GOBP%GO:0051043	0.0289304	0.212115	1.57172	1	TIMP2,ADAM9,SNX9,SH3D19,TNFRSF1B,TIMP3
RIBONUCLEOPROTEIN COMPLEX SUBUNIT ORGANIZATION%GOBP%GO:0071826	RIBONUCLEOPROTEIN COMPLEX SUBUNIT ORGANIZATION%GOBP%GO:0071826	0.0291262	0.213251	-1.39412	-1	GFM2,MDN1,OGFOD1,EIF2S3,RRP7BP,ADAR,BOP1,PLD6,RRP7A,KIF5B,RUVBL1,NLE1,SNRPD3,SRSF1,PPAN,DHX37,PRPF31,PRMT7,CLNS1A,EIF2S1,EIF5,RRS1,PRMT5,GCFC2,BICD1,DDX39B,SRPK2,PIH1D1,RUVBL2,SRSF10,DICER1,NCBP1,NAF1,HSP90AA1,SRSF12
REGULATION OF ANGIOGENESIS%GOBP%GO:0045765	REGULATION OF ANGIOGENESIS%GOBP%GO:0045765	0.0292683	0.213991	-1.4518	-1	MTDH,ITGB1,ADGRB1,HK2,SYNJ2BP,VASH1,CLDN5,SLC12A2,NGFR,EMILIN1,ITGB1BP1,PIK3CB,YJEFN3,XBP1,STAB1,E2F2,HTATIP2,ADAM12,STAT1,ROCK2
REGULATION OF CELL GROWTH%GOBP%GO:0001558	REGULATION OF CELL GROWTH%GOBP%GO:0001558	0.029477	0.215215	1.28387	1	CDKN1A,SMAD3,SERTAD3,ADAM17,SDCBP,FLCN,SEMA3C,CDC42,CTTN,SGK1,SMAD4,SEMA4B,RNF6,EI24,CISH,SESN2,VGLL4,PAK4,ADNP2,HSPA1B,MTPN,SERTAD2,IP6K2,PRDM11,TFRC
TOLL-LIKE RECEPTOR SIGNALING RELATED TO MYD88%WIKIPATHWAYS_20201210%WP3858%HOMO SAPIENS	TOLL-LIKE RECEPTOR SIGNALING RELATED TO MYD88%WIKIPATHWAYS_20201210%WP3858%HOMO SAPIENS	0.0295276	0.215283	1.56415	1	TRAF6,RELB,TICAM1,TIRAP,MAPK1,IRF7,TLR4,NFKB2,TLR7,TBK1
PID_NETRIN_PATHWAY%MSIGDB_C2%PID_NETRIN_PATHWAY	PID_NETRIN_PATHWAY%MSIGDB_C2%PID_NETRIN_PATHWAY	0.0296321	0.215743	1.55219	1	CDC42,NCK1,SRC,MAPK1,RAC1,CAMK2A
RESPONSE TO FLUID SHEAR STRESS%GOBP%GO:0034405	RESPONSE TO FLUID SHEAR STRESS%GOBP%GO:0034405	0.0297619	0.216386	1.53691	1	ABCA1,MAPK7,CITED2,MTSS1,NFE2L2,SREBF2,P2RX4,HDAC3,SMAD6
VEGFA-VEGFR2 SIGNALING PATHWAY%WIKIPATHWAYS_20201210%WP3888%HOMO SAPIENS	VEGFA-VEGFR2 SIGNALING PATHWAY%WIKIPATHWAYS_20201210%WP3888%HOMO SAPIENS	0.0298793	0.216937	1.30261	1	CRIP2,MYO1C,NCF1,MDM2,ANXA1,SDCBP,TXNIP,HBD,CRK,DNAJB4,NFKBIA,ATF2,CCRL2,CDC42,TMEM170A,PLAUR,CTNNB1,IGFBP7,DNAJB9,RAB5A,ZNF555,ADRB2,NCK1,FADD,LRRFIP2,CBL,ADAM9,SRC,MAPK1,NFATC1,ATP6V0D1,NCF2,OCRL,FOXO3,RAC1,PDPK1,MAP2K3,RICTOR,USP10,EIF3F,DUSP5,PTGS2,PDE4DIP,RAB11A,ARF4,RPS6KA5,MAPK14,MAPKAPK2,IER5,GATA2,RAPGEF1
POSITIVE REGULATION OF EPITHELIAL CELL MIGRATION%GOBP%GO:0010634	POSITIVE REGULATION OF EPITHELIAL CELL MIGRATION%GOBP%GO:0010634	0.0299416	0.217087	1.44395	1	ANXA1,ADAM17,RRAS,HMOX1,CD40,ADAM9,MAP3K3,SRC,FGFR1,PIK3C2A,RAC1,PDPK1,MAP2K3,PTGS2,RAB11A,THBS1,MAPRE2,MAPK14,ENPP2,GATA2,BCAS3,GRN,P2RX4
OSSIFICATION%GOBP%GO:0001503	OSSIFICATION%GOBP%GO:0001503	0.0301954	0.218407	-1.49992	-1	HSPE1,RRBP1,MYBBP1A,HNRNPU,FASN,SYNCRIP,TGFB3
REGULATION OF LIPID KINASE ACTIVITY%GOBP%GO:0043550	REGULATION OF LIPID KINASE ACTIVITY%GOBP%GO:0043550	0.0302075	0.218407	1.53254	1	CCR7,PIK3IP1,ATG14,PIK3R4,FGFR3,FLT3,PIP4K2C,AMBRA1,WDR91,RB1
RAF-INDEPENDENT MAPK1 3 ACTIVATION%REACTOME%R-HSA-112409.2	RAF-INDEPENDENT MAPK1 3 ACTIVATION%REACTOME%R-HSA-112409.2	0.030303	0.218795	1.54984	1	DUSP10,CDK1,IL6R,MAPK1,DUSP5,MAPK3,JAK2,DUSP4,DUSP2,JAK1
INTERACTOME OF POLYCOMB REPRESSIVE COMPLEX 2 (PRC2) %WIKIPATHWAYS_20201210%WP2916%HOMO SAPIENS	INTERACTOME OF POLYCOMB REPRESSIVE COMPLEX 2 (PRC2) %WIKIPATHWAYS_20201210%WP2916%HOMO SAPIENS	0.0303644	0.218935	1.62854	1	MORC3,EED,AEBP2,ELL,TRIM35,SUZ12,RBBP4,JARID2,RBBP7
INTRACELLULAR LIPID TRANSPORT%GOBP%GO:0032365	INTRACELLULAR LIPID TRANSPORT%GOBP%GO:0032365	0.030426	0.219075	1.54041	1	LDLR,NPC2,ABCA1,LDLRAP1,ABCG1,OSBPL2
ACTIVATION OF INNATE IMMUNE RESPONSE%GOBP%GO:0002218	ACTIVATION OF INNATE IMMUNE RESPONSE%GOBP%GO:0002218	0.0304733	0.219114	1.2746	1	TNFAIP3,IRAK2,BCL10,TRAF6,ZCCHC3,PIK3R4,TAB2,RELB,TICAM1,CD40,RIPK1,FADD,BTRC,TIFA,TIRAP,BIRC3,SRC,TYROBP,IRF7,PDPK1,PSMD5,TANK,LILRA2,TLR6,DDX58,TLR4,OTULIN,RPS6KA5,MAPKAPK2,SFTPD,TLR7,CLEC10A,ICAM2,LACC1,PSMD11,PIK3AP1,IFIH1,TBK1,CARD11,CASP8,LYN,CTSB,CD36,NLRC4,SIN3A,FCER1G,MAP3K7,UBE2D1,BIRC2,RAF1
G1/S TRANSITION OF MITOTIC CELL CYCLE%GOBP%GO:0000082	G1/S TRANSITION OF MITOTIC CELL CYCLE%GOBP%GO:0000082	0.0306527	0.219956	-1.47635	-1	PIM2,CCND1,CACUL1,RPA2,MCM6,CDC25A,CCNH,ZPR1,MCM4
REGULATION OF LIPID STORAGE%GOBP%GO:0010883	REGULATION OF LIPID STORAGE%GOBP%GO:0010883	0.0306748	0.219956	1.51088	1	NR1H2,ABCA1,NFKBIA,C3,ABCG1,ALKBH7,SREBF2,PLIN3,PPARD,PNPLA2,ITGAV,OSBPL8,EHD1
REGULATION OF PROTEIN TARGETING TO MEMBRANE%GOBP%GO:0090313	REGULATION OF PROTEIN TARGETING TO MEMBRANE%GOBP%GO:0090313	0.0307172	0.219957	1.55781	1	MYO1C,CHP1,C2CD5,MIEF2,DMTN
CD4-POSITIVE, ALPHA-BETA T CELL DIFFERENTIATION%GOBP%GO:0043367	CD4-POSITIVE, ALPHA-BETA T CELL DIFFERENTIATION%GOBP%GO:0043367	0.0308636	0.220582	1.62073	1	PTGER4,GPR183,IRF4
POSITIVE REGULATION OF CELLULAR COMPONENT BIOGENESIS%GOBP%GO:0044089	POSITIVE REGULATION OF CELLULAR COMPONENT BIOGENESIS%GOBP%GO:0044089	0.030889	0.220582	1.23308	1	CCR7,BMF,CDC42EP4,SMAD3,SDCBP,S100A10,ABCA1,CDC42,LPAR1,TPPP,CTTN,CTNNB1,ARHGEF5,PLEKHM1,FNIP1,SDC4,CCL24,RHOQ,NCK1,TSC1,SLAIN2,BAIAP2,TIRAP,HSPA1B,SRC,CLIP1,DLG5,SNX9,RAP1B,RAC1,SUB1,TFRC,CLEC7A,TLR6,SLF1,DYNC1H1,BBS4,TLR4,GBP5,TGFBR1,CEP120,WDR75,FNBP1L,DAG1,WASF2,ACTR2,CNOT6,EPHA1,DDB2,BCAS3,STAM,GHRL,SLF2,CAV1,RHOC,ERCC4,G3BP2,APC,ARPC2,MED14,HTT,PIP4K2C,ANLN,PLK4,MAPRE1,BRK1,LGALS3,RAB3GAP1,…
POSITIVE REGULATION OF FIBROBLAST PROLIFERATION%GOBP%GO:0048146	POSITIVE REGULATION OF FIBROBLAST PROLIFERATION%GOBP%GO:0048146	0.0309428	0.220663	1.62655	1	CDKN1A,CD74,S100A6,MYC,E2F1
APOPTOSIS-RELATED NETWORK DUE TO ALTERED NOTCH3 IN OVARIAN CANCER%WIKIPATHWAYS_20201210%WP2864%HOMO SAPIENS	APOPTOSIS-RELATED NETWORK DUE TO ALTERED NOTCH3 IN OVARIAN CANCER%WIKIPATHWAYS_20201210%WP2864%HOMO SAPIENS	0.0311203	0.221626	1.50549	1	CDKN1A,SOCS3,SQSTM1,MAPK1,NQO1,THBS1,IL7R
POSITIVE REGULATION OF PROTEIN TARGETING TO MEMBRANE%GOBP%GO:0090314	POSITIVE REGULATION OF PROTEIN TARGETING TO MEMBRANE%GOBP%GO:0090314	0.03117	0.221677	1.58786	1	MYO1C,CHP1,C2CD5,MIEF2
REGULATION OF MULTI-ORGANISM PROCESS%GOBP%GO:0043900	REGULATION OF MULTI-ORGANISM PROCESS%GOBP%GO:0043900	0.0313448	0.222616	1.24879	1	MICB,ANXA2,TNFAIP3,DYNLT1,TRIM38,CD74,STAU1,HLA-DRB1,PTX3,CD4,ZCCHC3,SEC14L1,OPTN,CAV2,CHMP3,TRIM21,TRIM62,KPNA2,MX1,CCL3,BIRC3,NELFA,AXL,CHMP2B,TBC1D20,APOBEC3B,TRIB1,LHFPL2,RNASEL,CLEC7A,LILRA2,DDX58,ZBED1,OAS2,TMEM39B,SMURF2,DTX3L,APOBEC3C,SFTPD,TRIM22,GRN,CAV1,CD55,TRIM13
CELLULAR ROLES OF ANTHRAX TOXIN%PATHWAY INTERACTION DATABASE NCI-NATURE CURATED DATA%CELLULAR ROLES OF ANTHRAX TOXIN	CELLULAR ROLES OF ANTHRAX TOXIN%PATHWAY INTERACTION DATABASE NCI-NATURE CURATED DATA%CELLULAR ROLES OF ANTHRAX TOXIN	0.0314629	0.222848	1.61531	1	IL18,MAPK1,MAP2K3,NLRP1,MAP2K7,CASP1,MAPK3,MAP2K4
REGULATION OF CELL DEVELOPMENT%GOBP%GO:0060284	REGULATION OF CELL DEVELOPMENT%GOBP%GO:0060284	0.0314624	0.222848	1.22258	1	LDLR,DYNLT1,S100A10,SORL1,CRK,SEMA3C,S1PR2,CDC42,LPAR1,PSEN1,GPR183,CTTN,BHLHE40,CTNNB1,PLXNC1,SMAD4,CX3CR1,SCARB2,TWF1,RGS14,PRUNE1,SEMA4B,CDK1,RNF6,ID2,ZFHX3,CCR2,SIGLEC15,CDH2,ARNTL,CCL3,CAMK1D,RFX3,SPRY3,FGFR1,DLG5,TYROBP,INPP5F,SERPINF1,RAC1,VCL,ARSB,CLEC7A,F11R,CAMK2A,TNFRSF1B,MMD,CAMK2G,CRKL,B2M,DMTN,CSNK1D,RASAL1,SKI,RAPGEF1,ARHGEF7,HMGB2,ECT2,GRN,RAP1A,EFNB2,SRGAP2C,FZD4,P2RX4,NPTN
NUCLEOSIDE DIPHOSPHATE METABOLIC PROCESS%GOBP%GO:0009132	NUCLEOSIDE DIPHOSPHATE METABOLIC PROCESS%GOBP%GO:0009132	0.0320151	0.226434	-1.58629	-1	HK2,LDHA,HK1,CMPK1,TPI1,NME2,ENTPD7,GAPDH,PKM,NUDT18,AK1,PFKL,PFKM,ENO1,ENO3,ALDOA,DTYMK,NUDT16,AK4,ENO2,AK2
REGULATION OF LEUKOCYTE APOPTOTIC PROCESS%GOBP%GO:2000106	REGULATION OF LEUKOCYTE APOPTOTIC PROCESS%GOBP%GO:2000106	0.0320586	0.226434	1.56086	1	CCR7,ANXA1,ADAM17,BCL10,FNIP1,FADD,AXL,IRF7
RESPONSE TO CADMIUM ION%GOBP%GO:0046686	RESPONSE TO CADMIUM ION%GOBP%GO:0046686	0.0320995	0.226434	1.58982	1	MT2A,MT1E,NCF1,MAPK1
REGULATION OF ALPHA-BETA T CELL ACTIVATION%GOBP%GO:0046634	REGULATION OF ALPHA-BETA T CELL ACTIVATION%GOBP%GO:0046634	0.0322654	0.227296	1.43101	1	ANXA1,HLA-DRA,MYB,CD86,TGFBR2,HLA-DRB1,CCR2,IL18,TNFSF4,SOCS1,IRF1,NLRP3,SOCS5,RC3H2,CD55,RC3H1,IRF4,PTPN22,PRDM1,LILRB4
IL1%NETPATH%IL1	IL1%NETPATH%IL1	0.0327511	0.230407	1.4138	1	IRAK2,SQSTM1,NFKBIA,ATF2,IL1RN,TRAF6,MAPK1,MAP2K3,MAPK14,PPP6C,S100B,MAP3K2
POSITIVE REGULATION OF T CELL MEDIATED IMMUNITY%GOBP%GO:0002711	POSITIVE REGULATION OF T CELL MEDIATED IMMUNITY%GOBP%GO:0002711	0.0328647	0.230895	1.52556	1	HLA-DRA,TRAF6,FBXO38,HLA-DRB1,ZBTB1,FADD,IL18,TNFSF4,B2M,NLRP3
RESPONSE TO DECREASED OXYGEN LEVELS%GOBP%GO:0036293	RESPONSE TO DECREASED OXYGEN LEVELS%GOBP%GO:0036293	0.0329865	0.231353	1.32742	1	MDM2,SMAD3,ADAM17,ALAS1,BNIP3L,HMOX1,SMAD4,ADA,HIF1AN,MYC,TSC1,CITED2,NFE2L2,PSMD5,PTGS2,STOX1,DDIT4,THBS1,EGLN3,CAV1,PSMD11,SLC11A2,NOTCH1
RESPONSE TO INTERLEUKIN-6%GOBP%GO:0070741	RESPONSE TO INTERLEUKIN-6%GOBP%GO:0070741	0.0330187	0.231353	1.59941	1	SOCS3,CHI3L1,SMAD4,CBL,SRC,IL6R,FOXA2,IL6ST,CTR9,ST3GAL6
REGULATION OF CELL MIGRATION INVOLVED IN SPROUTING ANGIOGENESIS%GOBP%GO:0090049	REGULATION OF CELL MIGRATION INVOLVED IN SPROUTING ANGIOGENESIS%GOBP%GO:0090049	0.0331501	0.231651	1.54581	1	ANXA1,HMOX1,CARD10,MAP3K3,PIK3C2A,PDCD10,PTGS2,THBS1,GATA2,NOTCH1
SIALIC ACID METABOLISM%REACTOME%R-HSA-4085001.2	SIALIC ACID METABOLISM%REACTOME%R-HSA-4085001.2	0.0331501	0.231651	1.54546	1	SLC17A5,ST3GAL1,ST3GAL5,GNE,CTSA,ST8SIA6,NEU1,ST3GAL6,NEU4,NANP,ST6GAL1,NPL
BIOCARTA_AKT_PATHWAY%MSIGDB_C2%BIOCARTA_AKT_PATHWAY	BIOCARTA_AKT_PATHWAY%MSIGDB_C2%BIOCARTA_AKT_PATHWAY	0.0333333	0.231689	1.54539	1	NFKBIA,FOXO3,PDPK1,CASP9,PPP2CA,PIK3CA,IKBKG
INTERCONVERSION OF NUCLEOTIDE DI- AND TRIPHOSPHATES%REACTOME DATABASE ID RELEASE 75%499943	INTERCONVERSION OF NUCLEOTIDE DI- AND TRIPHOSPHATES%REACTOME DATABASE ID RELEASE 75%499943	0.0333333	0.231689	-1.66076	-1	CTPS1,GLRX,TXNRD1,CMPK1,RRM2B,NME2,DCTPP1,NME1,AK1,DCTD,DTYMK,AK4
PYRIMIDINE-CONTAINING COMPOUND BIOSYNTHETIC PROCESS%GOBP%GO:0072528	PYRIMIDINE-CONTAINING COMPOUND BIOSYNTHETIC PROCESS%GOBP%GO:0072528	0.0333333	0.231689	-1.66191	-1	CTPS1,DHODH,CMPK1,DUT,CAD
REGULATION OF DEVELOPMENTAL GROWTH%GOBP%GO:0048638	REGULATION OF DEVELOPMENTAL GROWTH%GOBP%GO:0048638	0.0333265	0.231689	1.3955	1	CDKN1A,DUSP10,SEMA3C,AGR2,CTTN,SEMA4B,RNF6,INSR,VGLL4,LATS1,TGFBR1,GDF15,RASAL1,FGFR3,GHRL,NKD1,NOTCH1
CARDIOCYTE DIFFERENTIATION%GOBP%GO:0035051	CARDIOCYTE DIFFERENTIATION%GOBP%GO:0035051	0.0334646	0.231982	1.536	1	ACVR1,MAML1,SMAD4,PDCD4,SPRY1,KDM6B,MEF2A,NOTCH1
LEUKOCYTE HOMEOSTASIS%GOBP%GO:0001776	LEUKOCYTE HOMEOSTASIS%GOBP%GO:0001776	0.0334646	0.231982	1.533	1	ANXA1,TNFAIP3,TNFSF14,GPR183,FADD,FAS,FLT3,SLC15A4,LYN
BIOCARTA_CTCF_PATHWAY%MSIGDB_C2%BIOCARTA_CTCF_PATHWAY	BIOCARTA_CTCF_PATHWAY%MSIGDB_C2%BIOCARTA_CTCF_PATHWAY	0.0342742	0.232524	1.51719	1	MDM2,TGFBR2,SMAD4,MYC,TGFBR1
CAMKK2 PATHWAY%WIKIPATHWAYS_20201210%WP4874%HOMO SAPIENS	CAMKK2 PATHWAY%WIKIPATHWAYS_20201210%WP4874%HOMO SAPIENS	0.0339321	0.232524	1.5357	1	SQSTM1,HMOX1,TSC1,MAPK1,NFE2L2,RAC1,WFS1,MAPK3,RAF1,EP300,CREB1
CD4-POSITIVE, ALPHA-BETA T CELL ACTIVATION%GOBP%GO:0035710	CD4-POSITIVE, ALPHA-BETA T CELL ACTIVATION%GOBP%GO:0035710	0.0336388	0.232524	1.57295	1	PTGER4,GPR183,TNFSF4,IRF4
CELL CYCLE G1/S PHASE TRANSITION%GOBP%GO:0044843	CELL CYCLE G1/S PHASE TRANSITION%GOBP%GO:0044843	0.0340273	0.232524	-1.47372	-1	PIM2,CCND1,CACUL1,RPA2,MCM6,CDC25A,CCNH,ZPR1,MCM4
CELL JUNCTION ORGANIZATION%REACTOME%R-HSA-446728.2	CELL JUNCTION ORGANIZATION%REACTOME%R-HSA-446728.2	0.0337711	0.232524	-1.57213	-1	ITGB1,FLNC,LIMS1,PRKCI,CLDN5,PVR
CELL RECRUITMENT (PRO-INFLAMMATORY RESPONSE)%REACTOME DATABASE ID RELEASE 75%9664424	CELL RECRUITMENT (PRO-INFLAMMATORY RESPONSE)%REACTOME DATABASE ID RELEASE 75%9664424	0.0342052	0.232524	1.53242	1	TXNIP,C3,IL18,NFKB2,NLRP3,P2RX4,MEFV,CASP1,ENTPD1
GANGLIOSIDE METABOLIC PROCESS%GOBP%GO:0001573	GANGLIOSIDE METABOLIC PROCESS%GOBP%GO:0001573	0.0342742	0.232524	1.51865	1	ST3GAL1,GM2A,ST3GAL5,HEXB,B3GALT4,ST8SIA6,NEU1,NEU4
IRON ION HOMEOSTASIS%GOBP%GO:0055072	IRON ION HOMEOSTASIS%GOBP%GO:0055072	0.034256	0.232524	1.44868	1	MT-RNR2,HMOX1,SMAD4,MYC,ATP6V1A,FTH1,FTL,HEPH,FBXL5,ATP6V0D1,TFRC,B2M,ATP6V1G1,SLC40A1,SLC11A2,FLVCR1
MEMBRANE LIPID CATABOLIC PROCESS%GOBP%GO:0046466	MEMBRANE LIPID CATABOLIC PROCESS%GOBP%GO:0046466	0.0340681	0.232524	1.55213	1	ASAH1,GM2A,SGPL1,CYP1B1,HEXB,SMPD1,ENPP2,FUCA1,GALC,NEU1,NEU4
ORGANOPHOSPHATE CATABOLIC PROCESS%GOBP%GO:0046434	ORGANOPHOSPHATE CATABOLIC PROCESS%GOBP%GO:0046434	0.03409	0.232524	-1.48656	-1	ACOT7,HK2,TDG,NEIL2,GPCPD1,NTHL1,UNG,LDHA,HK1,DUT,PRDX6,NT5M,TPI1,IMPA2,GDE1,DCTPP1,ENTPD7,PNP,PLBD2,GAPDH,PDXP,PKM,INPP1,NUDT18,PFKL,PFKM,ENO1,ABHD16A,ENO3,ALDOA
PATHWAYS AFFECTED IN ADENOID CYSTIC CARCINOMA%WIKIPATHWAYS_20201210%WP3651%HOMO SAPIENS	PATHWAYS AFFECTED IN ADENOID CYSTIC CARCINOMA%WIKIPATHWAYS_20201210%WP3651%HOMO SAPIENS	0.034256	0.232524	1.4447	1	MYB,HIST1H1E,MYC,ARID5B,KDM6B,SMARCE1,BCORL1,FOXO3,NOTCH1,MAX,ERBIN,SETD2,RAF1,TLK1,EP300,KANSL1,FGFR4,PTEN,CREBBP
PATHWAYS IN CLEAR CELL RENAL CELL CARCINOMA%WIKIPATHWAYS_20201210%WP4018%HOMO SAPIENS	PATHWAYS IN CLEAR CELL RENAL CELL CARCINOMA%WIKIPATHWAYS_20201210%WP4018%HOMO SAPIENS	0.0337711	0.232524	-1.56781	-1	HK2,BHLHE41,CEP290,DEPTOR,FASN,ACACA,VHL,PBRM1,CAMK1,TGFB1,TSC2,BAP1,PFKL,SSPN,PHGDH,PFKM,MLST8,ENO3,SDSL
POSITIVE REGULATION OF ALPHA-BETA T CELL ACTIVATION%GOBP%GO:0046635	POSITIVE REGULATION OF ALPHA-BETA T CELL ACTIVATION%GOBP%GO:0046635	0.0343009	0.232524	1.5488	1	ANXA1,HLA-DRA,MYB,CD86,TGFBR2,HLA-DRB1,CCR2,IL18,TNFSF4,SOCS1,NLRP3,SOCS5,CD55
POSITIVE REGULATION OF CYSTEINE-TYPE ENDOPEPTIDASE ACTIVITY%GOBP%GO:2001056	POSITIVE REGULATION OF CYSTEINE-TYPE ENDOPEPTIDASE ACTIVITY%GOBP%GO:2001056	0.0337838	0.232524	-1.44648	-1	HSPE1,SNCA,PPM1F,PRR7,HIP1,NGFR,F2R,HTRA2,GRAMD4,TRADD,PDCD5,DLC1,ST18,UACA,PMAIP1,LCK,PDCD2,PIDD1,CARD9,BAK1
PURINERGIC SIGNALING IN LEISHMANIASIS INFECTION%REACTOME%R-HSA-9660826.1	PURINERGIC SIGNALING IN LEISHMANIASIS INFECTION%REACTOME%R-HSA-9660826.1	0.0342052	0.232524	1.53242	1	TXNIP,C3,IL18,NFKB2,NLRP3,P2RX4,MEFV,CASP1,ENTPD1
RESPONSE TO PEPTIDE%GOBP%GO:1901652	RESPONSE TO PEPTIDE%GOBP%GO:1901652	0.0340461	0.232524	1.28671	1	MDM2,ANXA1,VIM,NR4A2,PSEN1,ICAM1,RAB12,FCGR2B,C2CD5,RHOQ,ATP6V1A,CAV2,ADRB2,INSR,TSC1,BAIAP2,GAB1,ATP6V1D,SH2B2,NR4A1,SRC,ATP6V0D1,PIK3C2A,BCAR3,PDPK1,CAMK2A,TLR6,NLRP1,TLR4,PDE3B,ATP6V1G1,INSIG2,SORBS1,CAV1,RAB13,APC,ADCY7,STAT4,ATP6V1C1,IGF1R,ATP6V1C2,LYN,ERBIN,MYO5A,EPM2AIP1,CD36,PTPN22,LPIN1,DENND4C
TRIF-DEPENDENT TOLL-LIKE RECEPTOR SIGNALING PATHWAY%GOBP%GO:0035666	TRIF-DEPENDENT TOLL-LIKE RECEPTOR SIGNALING PATHWAY%GOBP%GO:0035666	0.0342874	0.232524	1.55635	1	TICAM1,CD40,RIPK1,FADD,BIRC3,IRF7,TANK,TLR6,TLR4,TBK1,CASP8,UBE2D1,BIRC2
ACTIVATION OF GENE EXPRESSION BY SREBF (SREBP)%REACTOME DATABASE ID RELEASE 75%2426168	ACTIVATION OF GENE EXPRESSION BY SREBF (SREBP)%REACTOME DATABASE ID RELEASE 75%2426168	0.0344129	0.23298	1.52819	1	IDI1,MVK,HELZ2,MTF1,DHCR7,HMGCS1,NFYC,SREBF2,TGS1,FDFT1,FDPS,SC5D,LSS
MITOCHONDRIAL RESPIRATORY CHAIN COMPLEX ASSEMBLY%GOBP%GO:0033108	MITOCHONDRIAL RESPIRATORY CHAIN COMPLEX ASSEMBLY%GOBP%GO:0033108	0.034662	0.233769	-1.49348	-1	COX20,NDUFB5,BCS1L,NUBPL,TMEM126B,OMA1,NDUFAF4,TAZ,ACAD9,COX18,SLC25A33,LYRM7
[truncated: 4,442 more rows]
